# Supplementary material for: Characterization of Microsatellites in the Akebia trifoliata Genome and Their Transferability and Development of a Whole Set of Effective, Polymorphic, and Physically Mapped Simple Sequence Repeat Markers
Source: Front Plant Sci. 2022 Mar 18;13:860101. doi: 10.3389/fpls.2022.860101 (PMC8971770; doi:10.3389/fpls.2022.860101)
Supplement: Supplementary file 1 [file Data_Sheet_1.ZIP › Supplementary_Tables.xlsx]

## Sheet: Table S1
Supplementary Table 1. Geographic distribution of 100 A. trifoliata germplasms.
Materials id	Longitude	Latitude
1	103°03'E	30°01'N
2	104°53'E	32°41'N
3	105°39'E	31°21'N
4	104°22'E	31°34'N
5	105°52'E	32°29'N
6	105°24'E	30°59'N
7	104°07'E	29°65'N
8	105°34'E	30°10'N
9	108°05'E	31°92'N
10	104°36'E	31°96'N
11	104°98'E	29°18'N
12	105°44'E	28°16'N
13	106°29'E	32°23'N
14	105°93'E	31°73'N
15	103°57'E	29°74'N
16	103°34'E	29°56'N
17	106°04'E	31°35'N
18	106°57'E	31°08'N
19	103°59'E	31°48'N
20	102°18'E	27°40'N
21	106°83'E	32°35'N
22	102°85'E	29°79'N
23	105°81'E	28°04'N
24	105°72'E	32°33'N
25	105°99'E	32°52'N
26	103°08'E	29°24'N
27	103°95'E	29°21'N
28	105°90'E	30°99'N
29	107°73'E	31°35'N
30	106°97'E	30°84'N
31	103°85'E	31°68'N
32	101°51'E	27°42'N
33	105°39'E	30°87'N
34	102°65'E	29°34'N
35	104°75'E	31°78'N
36	105°17'E	31°64'N
37	101°74'E	26°50'N
38	104°19'E	31°09'N
39	105°24'E	32°58'N
40	105°71'E	30°76'N
41	103°90'E	28°96'N
42	105°02'E	30°28'N
43	107°87'E	31°08'N
44	99°99'E	31°62'N
45	102°75'E	27°06'N
46	106°78'E	30°39'N
47	106°63'E	31°79'N
48	104°85'E	29°76'N
49	108°77'E	29°53'N
50	116°01'E	26°47'N
51	117°86'E	29°25'N
52	114°52'E	26°31'N
53	117°94'E	28°45'N
54	117°96'E	27°66'N
55	117°79'E	29°34'N
56	115°86'E	28°68'N
57	110°00'E	27°57'N
58	109°95'E	28°62'N
59	109°73'E	26°89'N
60	109°17'E	27°35'N
61	112°20'E	25°90'N
62	111°95'E	25°57'N
63	110°16'E	26°58'N
64	113°69'E	25°55'N
65	112°68'E	26°74'N
66	113°03'E	25°78'N
67	112°37'E	25°59'N
68	112°56'E	25°28'N
69	112°95'E	25°40'N
70	111°33'E	27°73'N
71	112°30'E	27°96'N
72	113°34'E	27°00'N
73	113°54'E	26°78'N
74	110°55'E	29°35'N
75	110°16'E	29°40'N
76	111°38'E	29°58'N
77	112°16'E	28°52'N
78	113°58'E	28°70'N
79	113°64'E	28°16'N
80	109°50'E	32°34'N
81	107°90'E	32°54'N
82	104°96'E	33°37'N
83	105°38'E	26°78'N
84	106°59'E	26°84'N
85	105°74'E	26°30'N
86	107°19'E	26°34'N
87	108°43'E	27°05'N
88	107°45'E	28°55'N
89	108°12'E	28°26'N
90	115°21'E	29°83'N
91	114°87'E	30°64'N
92	114°13'E	31°56'N
93	113°30'E	31°85'N
94	109°14'E	26°23'N
95	109°49'E	29°99'N
96	109°01'E	26°19'N
97	118°34'E	29°72'N
98	100°83'E	24°45'N
99	107°28'E	35°64'N
100	118°31'E	29°70'N

## Sheet: Table S2
Supplementary Table 2. Frequency of different types of SSR motifs in A. trifoliata
Microsatellite motifs	No. of repeats																	Total	Percent of each motif
	5	6	7	8	9	10	11	12	13	14	15	16	17	18	19	20	>20
Si-nucleotide repeats (SNR)
A/T	-	-	-	-	-	102740	46439	30161	20954	19088	14676	11974	9251	7237	4729	3092	8193	278534	0.957596
C/G	-	-	-	-	-	1365	1486	1352	986	1343	905	778	678	697	590	419	1735	12334	0.0424041
Subtotal	-	-	-	-	-	104105	47925	31513	21940	20431	15581	12752	9929	7934	5319	3511	9928	290868	1
Di-nucleotide repeats (DNR)
AT/AT	-	12034	8805	7147	5787	4450	3533	2691	2175	1805	1437	1259	1148	983	845	815	5536	60450	0.533544
AG/CT	-	9206	6956	6250	4956	3415	2161	1541	1144	975	777	661	616	508	438	400	1450	41454	0.365881
AC/GT	-	2770	2014	1518	1170	857	627	485	362	293	229	185	171	121	110	91	289	11292	0.0996655
CG/CG	-	61	28	11	2	1	-	-	-	-	-	-	-	-	-	-	0	103	0.000909099
Subtotal	-	24071	17803	14926	11915	8723	6321	4717	3681	3073	2443	2105	1935	1612	1393	1306	7275	113299	1
Tri-nucleotide repeats (TNR)
AAT/ATT	4960	2732	1402	746	426	266	142	109	90	58	29	18	8	1	4	3	6	11000	0.451912
AAG/CTT	2957	1249	529	233	98	51	25	10	7	5	2	3	-	-	-	-	0	5169	0.212358
ATC/GAT	1603	611	265	93	47	20	11	6	2	-	1	-	-	-	1	-	0	2660	0.109281
ACC/GGT	1235	511	243	107	56	23	14	4	1	-	-	2	-	1	-	-	1	2198	0.0903003
AAC/GTT	1049	471	219	100	45	19	16	9	1	-	1	-	-	-	-	-	0	1930	0.0792901
Others	843	298	142	51	18	17	5	4	2	0	0	3	0	0	0	0	1	1384	0.0568588
Subtotal	12647	5872	2800	1330	690	396	213	142	103	63	33	26	8	2	5	3	8	24341	1
Tetra-nucleotide repeats (TtNR)
AAAT/ATTT	2358	463	116	38	23	14	2	4	-	-	-	-	-	-	-	-	1	3019	0.689427
AAAG/CTTT	196	54	22	10	2	4	1	1	1	-	-	-	-	-	-	-	0	291	0.0664535
ACAT/ATGT	103	51	33	10	6	3	4	-	-	1	-	-	-	-	-	-	0	211	0.0481845
AAAC/GTTT	131	33	11	2	1	-	-	-	-	-	-	-	-	-	-	-	0	178	0.0406485
AATT/AATT	114	24	4	-	-	-	-	-	-	-	-	-	-	-	-	-	0	142	0.0324275
Others	340	113	58	19	6	2	0	0	0	0	0	0	0	0	0	0	0	538	0.122859
Subtotal	3242	738	244	79	38	23	7	5	1	1	0	0	0	0	0	0	1	4379	1
Penta-nucleotide repeats (PNR)
AAAAT/ATTTT	233	51	8	1	-	-	-	-	-	-	-	-	-	-	-	-	0	293	0.30144
AATAT/ATATT	210	55	10	10	2	1	-	-	-	-	-	1	-	-	-	-	0	289	0.297325
AAAAG/CTTTT	46	14	5	1	1	-	-	-	-	-	-	-	-	-	-	-	0	67	0.06893
AAGAG/CTCTT	38	5	3	-	-	-	-	-	-	-	-	-	-	-	-	-	0	46	0.0473251
AAAAC/GTTTT	32	6	5	-	-	-	-	-	-	-	-	-	-	-	-	-	0	43	0.0442387
Others	175	49	9	1	0	0	0	0	0	0	0	0	0	0	0	0	0	234	0.240741
Subtotal	734	180	40	13	3	1	0	0	0	0	0	1	0	0	0	0	0	972	1
Hexa-nucleotide repeats (HNR)
AAAAAT/ATTTTT	75	14	6	1	3	1	-	-	-	-	-	-	-	-	-	-	0	100	0.230415
AAAAAG/CTTTTT	30	14	2	2	1	-	-	1	-	-	-	-	-	-	-	-	0	50	0.115207
AGGGGG/CCCCCT	19	4	1	-	-	-	-	-	-	-	-	-	-	-	-	-	0	24	0.0552995
AAAAAC/GTTTTT	12	3	3	-	-	-	-	-	-	-	-	-	-	-	-	-	0	18	0.0414747
ACCCCC/GGGGGT	12	6	-	-	-	-	-	-	-	-	-	-	-	-	-	-	0	18	0.0414747
Others	168	41	9	3	0	1	1	0	0	1	0	0	0	0	0	0	0	224	0.516129
Subtotal	316	82	21	6	4	2	1	1	0	1	0	0	0	0	0	0	0	434	1
Total	16939	30943	20908	16354	12650	113250	54467	36378	25725	23569	18057	14884	11872	9548	6717	4820	17212	434293

## Sheet: Table S3
Supplementary Table 3. Development of high polymorphism potential (HPP) SSR markers on 16 chromosomes
Chromosome	Start	End	SSR type	SSR	size	Verified marker	FORWARD PRIMER0 (5'-3')	REVERSE PRIMER0 (5'-3')
chr1	25140	25493	c	(TG)10(AG)7ggagagat(AG)6	54	-	CCCTCCCCTTTTTATCTGGA	GTTATGCGGGGGTCAACTTA
chr1	79088	79485	c	(A)10gctaccctacatatttttcttttcctcgttctctccacctcctcaccccaccccttc(T)11c(T)19	98	-	CAACTTTGAGGTCGTGGGTT	TGGCCATGCAATCAATTTTA
chr1	81966	82340	c	(A)12gtgttggacaatattaatatccccatgaagtattgagcgttagcattccct(TA)6	75	-	CCCCATGAAGTATTGAGCGT	TCATGCCCTTAGAATTTCTTCC
chr1	85114	85465	c	(A)10tggttttaaaatcaaataaactttaatttttg(A)10	52	-	ACAAATCTGTAAAAACCAAATCG	CGGCTTCAAAGTTCAACCTC
chr1	95862	96244	c	(TC)8(TA)25t(TA)8	83	-	TTAAGGGTCGTTTGGCTAACA	ATTTGACAGCCGTCCATTTC
chr1	100832	101274	c	(A)16c(TCAT)6tgttatcccagccggctttggcgttttccaatttggga(TC)13catctttggttacaggtaattctctt(TC)6	143	-	ATTCATTGTTATCCCAGCCG	TCCCCTTTGCTTGCTACACT
chr1	108141	108506	c	(TA)14ttctttaatttcttatgatt(TA)9	66	-	AACCCAAAATGCCTCAAGTG	GATTTGCACCATACCAAGCA
chr1	111960	112420	c	(GA)7gggggggagggtgacattggtgatgtaggcggctcagcaggacgcgc(G)17agctgccgatggaggcggagtagaatggggaggagagatgggtgaagctagcagaggcagaggtc(AG)9	161	-	AGCAGAGGCAGAGGTCAGAG	TTCCACCCTCATTTTTCCAC
chr1	168177	168541	c	(TA)9t(TA)23	65	-	GTTGCGGATTTCTCGTTGTT	GAAATCATCCTCGCCAAAAA
chr1	172192	172621	c	(A)14tttcagagagtttaactctccgttttctctttcactcgatgcccttctctctcacactctctctctatctcaaaccttctcgttatcgacagaacc(CT)10	130	-	TCCAAAATTAGTGCCCCATC	GGCGTCGAGAGAGAGAGAGA
chr1	173294	173649	c*	(C)17(CCCCT)5*cc(TA)8	56	-	GAAGTTTCAGGTTGGGCTGA	GGGTTCGGCTGAACATCTTA
chr1	242846	243242	c	(AT)11(GT)27g(GT)10	97	-	AAAAATGTGTATCGCGAGGG	TTTGGCTCCATTTTGACACA
chr1	243877	244228	c	(A)18gaatataacaaaagtaatatgaga(T)10	52	-	TTGGAGACTGTGGTCAAGGA	AAAAGGGGTAACTAAACACACCC
chr1	245262	245623	c	(TA)6ttatagtatttgttaaactaacatacatttttgtgtgg(GT)6	62	-	CTCGCTACCATTCCCATCAT	CACACACACACCCACACAAA
chr1	297739	298145	c	(A)13tttattttttagcttgatagaaggagttgaaaatggattgctaccaaactcctaatttgaaattgaaattcaatggtaa(ATT)5	107	-	TGTCAATTCAAACCCACAACC	AACCACATCAATTTGTGGCA
chr1	329424	329822	c	(A)10ttaaatgagaagtgttttagtaatttttcacaccaaaaataccct(TC)22	99	-	GGGCAAGGTGCATTATTCAA	GCTGTGGTGTTGGATTGTTG
chr1	330470	330895	c	(A)10tctaaaaaagcattatttttcaccgttagaatttaaattgtgttcgctagatatccattttcaaaagcttggatcaagctcaaaagaaattgtattttg(A)17	126	-	ACCTCGTGGCATTCAAAAAC	ATCACATCAGCAGTCCGACA
chr1	333242	333650	c	(T)10aaatcatgtgtatgttaatgcaacaagtattgagggtattttatactttgaatgaattctattgatgagatcaagtaagtt(A)18	109	-	AGTTGCTTTGATGGTGGATG	CCTTTGACCCGAAAACAAAA
chr1	346779	347154	c	(GA)12(GT)26	76	-	TTGATGAGGTGAAAGGGGAG	AAGCACACACACACACACACA
chr1	349008	349414	c	(T)10aaaattcttgtgtatgttaatgcaaaaaagtattgatggtacttttgtaatttgaatgaattctatggatgagatcaagtaattt(A)12	107	-	GGTTTCTTTGACGGTGGGTA	GTTGAATTTCATTCTAACCCAAA
chr1	352306	352776	c	(A)12tgagctccctcttctaatataaggtattatgtaccaagatttgaggtgtgggtg(T)10caaagatgattgcgttatcaaccctcctcttgcgggttttattcttggatcttgtttgtgatattggaaaaagatttt(A)17	171	-	GGTAGGTGGGTTTAGTCCCC	GAGGAGGGTTGATAACGCAA
chr1	353825	354249	c	(A)13ttc(A)13ttttcaccactagaatttaaattttgtttgctagccgtccattttcaaaagcttggatgaagctcaaaagacattgtattt(A)15	125	-	TTTGCTAGCCGTCCATTTTC	ATCACATCAGCAATCCGACA
chr1	357702	358126	c	(A)13ttc(A)13ttttcaccactagaatttaaattttgtttgctagctgtccattttcaaaagcttggatgaagctcaaaagatattgtattttgaag(A)10	125	-	TTTAATGGTGGCCACAACAG	AACCCTAAAGCATCGGATCA
chr1	359798	360204	c	(T)10aattcatgtgtatgttaatgcaacaagtattgagggtatttttgtaatttaaatgaattctatggatgagatcaagtaagtc(A)15	107	-	TGTTAATGCAACAAGTATTGAGGG	TGTTGAATTTCATTTTCACCCA
chr1	362415	362833	c*	(T)10aattcatgtgtatgttaatgcaacaagtattgagggtatttttgtaatttaaatgaattctatggatgagatcaagtaagtc(A)14(AAT)5*	119	-	TGTTAATGCAACAAGTATTGAGGG	TGTTGAATTTCATTTTCACCCA
chr1	363283	363757	c	(T)12atatataattttctttacaaaagatatttttatttttttttattgtcaaaaggtcccatattcaaagtcttcataaaaaat(A)12gaagtccttccaactaattttgagtcgtttggatgatagatatataataattattattat(A)10	175	-	TCTTCTCGCGTTCTAAGGGA	TCTGCAACACAAACTCGACG
chr1	372144	372507	c	(TA)6t(TA)8atatatataatatat(TA)10	64	-	GGGTGCTGAACATTTCCCTA	CTCACCAAAAATCAGCCCAT
chr1	374888	375237	p2	(TA)25	50	-	TGGTAAAACTAAGGGTGGCG	CTCACCAAAAATCAGCCCAT
chr1	375276	375632	c	(TA)8t(TA)20	57	-	CTCACCAAAAATCAGCCCAT	CTCACCAAAAATCAGCCCAT
chr1	377720	378103	c	(T)13cccccagaaagatgagtggggtttcaacccttctcctgggggttttcttctct(TG)9	84	-	AGATTCAACAACCCACGCTC	CACTCATCTTTCTGGGGGAA
chr1	391045	391470	c	(T)17aaatatctcaattaaatcatgatttaaatagttatcgattaaatcatcacaaagtttttgaaaaaaagtcatgattaaccatgatttaatcgaggattt(A)10	126	-	TCGGATTGTAAGGAAAATCCAC	TTGGAAACAGTCGGGAAAAC
chr1	398500	398919	c	(A)12ttctaaaaaaaatattttcaccactagaatttaaattttgtttgctagctgtccattttcaaaagcttggatgaagctcaaaagacattgtattttg(A)11	120	-	TGGATCATGTTTTTGGATGC	GAAGCATCGGATCACGTTTT
chr1	400846	401252	c	(T)10aattcatgtgtatgttaatgcaacaagtattgagggtatttttgtaatttaaatgaattctatggatgagatcaagtaagtc(A)15	107	-	TGTTAATGCAACAAGTATTGAGGG	TGTTGAATTTCATTTTCACCCA
chr1	403464	403882	c*	(T)10aattcatgtgtatgttaatgcaacaagtattgagggtatttttgtaatttaaatgaattctatggatgagatcaagtaagtc(A)11(AAT)6*	119	-	TGTTAATGCAACAAGTATTGAGGG	TGTTGAATTTCATTTTCACCCA
chr1	404332	404733	c	(T)12atatataattttctttacaaaagatatttttattttttttattgtcaaaaggtcccatattcaaagtcttcat(A)17	102	-	ACGACCCTATCTGAACCGTG	TTGAATATGGGACCTTTTGACA
chr1	412010	412388	c	(TC)10ttctttttctttttctccttcttctccatccctcacctcct(CCA)6	79	-	CACTAACTTCGCTGCTGTCG	GGGGGAGAGGAAGAAGAAGA
chr1	429019	429388	p2	(AT)35	70	-	TAGGGTGCTGAACATTTCCC	TGGTAAAACTAAGGGTGGCG
chr1	432748	433142	c	(T)16ggtttctttattgtacatcctgtaccaggtctgtgtttgtttg(T)10ctttttcaatt(TGA)5	95	-	TGTGCAAAGAGAGAGGAGCA	CCAATCAGAGAGGTTCCTCAA
chr1	464115	464521	c	(TA)6aaatcacagttgaatttaaaattttagtttgtgtgcttgataaccgtccactttcaacaccttggatcaagttaaaaaaaatttg(A)10	107	-	CCGTCCACTTTCAACACCTT	CTTAAAAAGGGTCCTTCGGC
chr1	571574	572075	c	(A)10tttgagcacagaaaaattagatttcatagaatctggattggccaatcataaggcattgcatgtattgagggcatcccca(AT)12acccacgataggaaaaccctccaagcacgcagcgtcctacgattagtcaaattcgaaattttgcgaaatcttacattga(T)10	202	-	CCTCATCAAAGTCCTATCCCA	TGGAGGGTTTTCCTATCGTG
chr1	589686	590037	p2	(AT)26	52	-	TTTGAAATTCCATGACTTGGC	TTCCAAACATTTTTGCCCAT
chr1	613482	613831	p2	(TC)25	50	-	CAAGGGTCGGTAGCATCACT	TGGGGGAGAGAGAGAGAGAG
chr1	620491	620842	p2	(TA)26	52	-	ATGAACGGATCAAGGGACAT	TTCGAATGATCTTCCCATCA
chr1	637291	637704	c	(C)12(A)10g(A)18ctgtagcagcggtgggacccaccgttatattttattatatagatttgttttacttttc(A)15	114	-	ACCCCACTCCGTGTAGTTTG	GGTCAGCCACCATTTCTTGT
chr1	654959	655378	c	(A)12caggaaacaagaagactagttaaattgttaaaaacttcaaatcattggcagataaaacaaaagaaagaacaaaagaaaagtaaaagtgggg(T)17	120	-	TGGGTCAGGGAAGGTATCTG	TGCAAGCTGCCTCCTTTTAT
chr1	656216	656574	c	(A)10ttgaatcaaattatattagtcatagaattccctttgccc(T)10	59	-	CGATAAGGGATGGGATTTGA	CAAAGTCGGGCACTTTGAAT
chr1	657496	657898	c	(A)13ttcacattgaattttagttttaaatatggaaattcggtagccattcattttgagcaccaataatcaagctcaaaaag(T)13	103	-	ATACCCCCACACCACACAAT	GGTGCTCAAAATGAATGGCT
chr1	658190	658559	c	(T)10ctttaatcagatctaattcatgatcacaagaggtagagatgtttcttt(A)12	70	-	GGGAGTTCAATAGCCGTTCA	GGAAGCAGGTCTTCTTTAGCA
chr1	674895	675316	c	(A)10taaaaagaaaaagaaaaagaagaaagaatttggcctagag(T)10(A)10gtcattagaggttaatctctaatgacctaaatatatatgt(A)12	122	-	CCACCCTATTTTCCATGTGC	TTGGGCTTATAGTCGATGCC
chr1	680387	680745	c	(AAT)6agtaataataattttttttggaaggt(ATA)5	59	-	TGAAATATACTTTGCTTTGCCA	TGTTTTCTGAATGTCACAAGGTG
chr1	682258	682688	c	(A)10tctatttcttacaataaatatgatgaaagtcaaaaaaagacttaaacattttatttctctctctttctctctctt(TC)14(TA)9	131	-	TCAGGTCCGATTTGAACACA	AACCTTAGGGTGGGGAACAG
chr1	692340	692752	c	(T)12accaaacaggatatctcttgtggtacgtcaacagcctagagagagagaccagtctcttacatcaaaaatatagatttgcttcaggacatt(A)11	113	-	TTGTGGTACGTCAACAGCCT	GGCAATTGGATTCCAGAGAA
chr1	706075	706442	p2	(TA)34	68	-	GGACTAAACACACCCACGGT	TTCGGATTGGTTCGGTTCTA
chr1	730606	730976	c	(T)19gttttaactttgtcatacatacatgcatacataa(AT)9	71	-	GCTTGTTCATTGATGAGCATTT	GCTTTGGAATGTGACTGCAA
chr1	743462	743812	c	(T)11cttttggaaaacattttcttctggaaaaca(T)10	51	-	TTGGTAGTTTTCCAAGGTCCA	TTCCAGAAGAAAATGTTTTCCAA
chr1	786584	786968	c	(AT)21tattgatccacggtgttgaaaaatagagttta(T)11	85	-	TCATCCTCACCAAAAATCAGC	TTTTTCAACACCGTGGATCA
chr1	786860	787254	c	(T)16caaatttgataatccaatatcaaagccgtatagatttcattggaaaattcatattaaaaaattcagaa(T)11	95	-	AGATTCCAAATTCCAAGGTCA	TCAAGACCATGGATCAAGCC
chr1	794395	794782	c	(G)18tataagtatttggctacttgcttaaccataaaccattaaaacatttcagtgtaatc(T)14	88	-	GGCATCTTCAAGAAGTAGGCTT	CCAAACCCCCAATAGAGAGG
chr1	806202	806557	c	(TG)8(AG)20	56	-	AATATCTCGGCATGTGGGAG	CAATCCAACGGATGAGATGA
chr1	806927	807327	c*	(CT)7tgtttcttatagctaaggtgcggttgcgggctcaactccagtggccggtggtcatccctt(C)10(CT)9*	101	-	TCTCAATCCAAACAGAGCGTT	GTCGGAGTTGAGAGGCAGTC
chr1	828188	828604	c	(A)11ggcttgatccaaagttgtgagaatagatggctttcaaacttccaaatttaaaagtagaattcaatggtcaaaaataaatttgttttgatgc(T)15	117	-	GGCTTGATCCAAAGTTGTGAG	ACCATTGATGCTTTTCATCG
chr1	832910	833418	c	(CT)9cgtctcttgcagcgatcgtgcggttgtgggctcaactctgattgtcgacggtcac(CT)8ttg(TC)10gagtcttttgctatttgtgtgacagtgcggctatgtttgcatctcaattttgacgatcggttgtgggttgtag(CT)12	209	-	ATTGTCGACGGTCACCTCTC	TAAAACCCAAACCCATTCCA
chr1	862199	862611	c	(AC)6cgatcggcagccgcaagtcacagaaacgaacgagagagaaagagagaggcacggtccgcagtcgtatgtcgc(AG)8aa(G)11	113	-	CATCGTCGAAGGTCAAGGTT	TCTCTCCAACTGTGATTGCG
chr1	862450	862870	c	(GA)12gggagggaccgaccgatcgcaccttttgaagttcacaccgtggaaagtcgcagtcgctgccgaagagaaccagagac(GA)10	121	-	CATCGTCGAAGGTCAAGGTT	TCTCTCCAACTGTGATTGCG
chr1	870551	870950	c	(TC)9aaattttcgattcattttagggtttgatgttggttccttagctgggtttctgcgatttgtgtgatttaaa(T)12	100	-	AATCCTTCTCCTTCGCTTCC	AATCGCAGAAACCCAGCTAA
chr1	879449	879859	c	(AT)31t(GA)24	111	-	TCCTCACAAAAGATCAGCCC	TTAAGGTTGCTGAACGCTCC
chr1	881849	882271	c	(AT)9taaaattaaaattaaaattatatgattggttcactaattatgacaaaatcagtatttttctgtattatgataatttccacgtggcac(TTA)6	123	-	TCTCATATGGCCCTTGAACC	AGAAGCTTTCACCGACCTCA
chr1	885451	885846	c	(AT)6aatttaagtatacaagtgataagtacaattataatgttaaaaaattctaagttaaataaaaatagattaat(A)13	96	-	CAAAAAGTTCGTGTTGGTTCC	TGTGGGCGTTAATTTGATGA
chr1	915209	915563	c	(A)12gagaagagacacactaccttaagaaaaaaaaa(G)11	55	-	GTTCCATCAAGTGCCATGTG	GGACCTCGGTGTCGAATTTA
chr1	923331	923686	c	(A)12tttaaatcatctttttcacttaaaatcattttc(T)11	56	-	GGAATATGCAAAGTTGCCGT	CAACAAGAGCTCCTGATCCA
chr1	963612	964055	c	(AT)7ttatttgatcatccaagtggatttgtgaatcatgagttgaatctttgaacatccgagtcgaatggggtttcgagttttagaaaaatc(TA)6attattgaacaaactct(GA)7	144	-	TTCATGAAATGGCAATGCAC	TCGACTCGGATGTTCAAAGA
chr1	965570	965946	c	(TA)11ttatata(AT)7a(AT)8a(AT)8	77	-	CTTATGTATAAGCCCGGCCC	CCTTAGCTGTGCATGTAGATCG
chr1	967298	967726	c	(CA)10(TA)11ttcggcatctaacattagggagccaactgaattcttgtgaggatgatttctatggtgagatgataatcctcaacaac(A)10	129	-	CCACCCACTCACTCACACAC	AGTGGTTGACCAATTTTCGG
chr1	968189	968604	c	(AT)8tcttgagtaaagtagttttggaagataatataaagtggtttcgttttactactgtttatgttttaaacttttacaaaagcaa(AAT)6	116	-	CCATGGTGAAATTCCTCACAA	TTCAAATGTTTTGGTCCGGT
chr1	975600	975995	c	(A)10ttataatgatttaaaatatttgtttttctcattcgattcttgagaattggatccgataggtacccgtgtttgtttg(T)10	96	-	CCGATAGGTACCCGTGTTTG	GGTTTCGGCTTGATTCCTAA
chr1	981265	981651	c	(A)12caacctttatcttgtatttttatatttttctaatcgatttgactagctaggtggtaaaaaggact(A)10	87	-	GTGGCAAAAAGGACCAAAAA	TTTTCGCCACCTAGCTAGTCA
chr1	987518	987924	c	(A)12tgtaatattgaatgttaacgtccccttgaggtcttggacgttaacatt(AC)13atatatatc(TA)6	107	-	GGCAATGAATGCAAACAAAC	GTCCAAGACCTCAAGGGGAC
chr1	988476	988891	c	(AT)8tcttgagtaaagtagttttggaagataatataaagtggtttcgttttactactgtttatgttttaaacttttacaaaagcaa(AAT)6	116	-	CCATGGTGAAATTCCTCACAA	TTCAAATGTTTTGGTCCGGT
chr1	996098	996497	c	(A)12tgtaatattgaatgttaacgtccccttgaggtcttggacgttaacatt(AC)10(AT)10	100	-	GGCAATGAATGCAAACAAAC	GTCCAAGACCTCAAGGGGAC
chr1	997535	997900	c	(A)12(TA)19(GA)8	66	-	GAGGGTCAGGATCAAGGGAC	TTCTGGACGATCTTCCCATC
chr1	999605	1000080	c	(TA)8t(TA)24ggtatattcttaagtaagtagttttggaagaaaatataaagtagtttcgttttactactgtttatcttttaaacttttagaaaagcaaaaaaaatg(ATA)5	176	-	GAGCTGATTTTTGGTAAGGATGA	CGGGTTCTTACGACCCCTAT
chr1	1008614	1008968	c	(AT)19a(AT)8	55	-	CTCACCAAAAATCAGCCCAT	AAAAGCCCATTCCAAGACCT
chr1	1009832	1010294	c	(AT)20(TA)6tctacattgtaaaatattaagaaaaaaaattttataatgatttgaaatattttttttctcattcgatttttgagaattggaacagattggtacccgtg(T)13	163	-	GGAACAGATTGGTACCCGTG	CGGTTTCGGTTTGATTCCTA
chr1	1014488	1014889	c	(A)19ctcattttcaatttaagattctatctaaacctcaaggtaagataggattttttggaaaaagatgaattttagg(A)10	102	-	AAATGCCGTCATCTTCAACC	CGACGAAATTCAATCCATCA
chr1	1018477	1018838	c	(T)15atgttgtcaagcattttgaagatgtaagttaaaaag(A)11	62	-	GCTCCGTTCAATTTTGGAGA	CAAAAGAACCATCCTTGATCG
chr1	1018678	1019045	c	(A)14ttgaaatcaagtgggttttatagcatcgaggtctataaaa(T)14	68	-	CGATCAAGGATGGTTCTTTTG	CAAGGTCGAGGTCAACAATTT
chr1	1021832	1022252	c	(A)19ttcttcttgattttctctaaacatctctcacttttttaccctctcttgcaactttaatatctatcttcgatcgttaagaacaacataa(T)14	121	-	GACATAGACCTGCCCCTCAA	AAAGTTGCAAGAGAGGGTAAAAA
chr1	1047580	1048000	c	(A)18gatattgtcgttaacgatgctaacaatagtcatacatcgaaaaaatttccaaggtttaagaacaactccaaccgaggccttc(T)21	121	-	GATTTGCCCTTCCACAAAAA	TCACGTTTCAGAGGAACGAA
chr1	1080366	1080764	c	(GA)6tgacctgatagagtcgaagtaggcacaaatttgcatccaaactatatgtttgagatgaaacctattttttataacc(A)11	99	-	TCTGGTTCAAACTGCAAAGC	GCAAATTTGTGCCTACTTCG
chr1	1082945	1083349	c	(CA)11aataaaaaatataaaataaaaataacgacttttgttacgaatggtaaagtcgtg(T)10a(ATT)6	105	-	AATGGGAAAAAGTCACGCAC	TTCCATGACCCTAGAATCGG
chr1	1083968	1084337	c	(T)16ggtatatatattatatttttgagtaggatttctgattg(T)16	70	-	GATTGAGGCCACGTGAGAGT	TACATCCATGGAGGAGAGGG
chr1	1102587	1102960	c	(AC)13(AT)24	74	-	ATTGCCTATGTCCACGGAAG	TCGGACTAGGGTTTTGATGG
chr1	1126389	1126738	c	(T)11aatggatacattaacgat(TTA)7	50	-	GATGGATGGATTAATGACTTTCTC	TTGATTCGATTTTATGGGTTGTC
chr1	1149701	1150098	c	(CT)18(AT)14(TA)17	98	-	TCTATAAAAACCCACCCCTCTC	TTTTGAGAGGGTTTGAGAGCA
chr1	1163607	1164090	c	(A)11tccactatgagtattatatgtttgtgtataaatcctattttccatgtttggtcaaatttatattgaaattgattttcattttgttcaaa(AT)42	184	-	GCCAAGGCCTGTGAATTTTA	TGGAGGATGGGAGAAATTGA
chr1	1177035	1177414	c	(T)17gagagagagtgaaaaatcatttgcaatgcaaaaaccccatcttccacccta(T)12	80	-	GGTGGTGGCAGAGAAGAGAG	AAATAGGGTGGAAGATGGGG
chr1	1179700	1180169	c	(T)12ccacaaaattaaacacaataatcatccaaaaaccccaactccctaacaggaagaggttcgaccgtgagaaaccagcgccgctgcagcttcacctgta(CT)16caaactttgattcgatc(T)12	170	-	CCAATCCGATCCAAACTGAT	TTCTCACGGTCGAACCTCTT
chr1	1189643	1189992	c	(T)13ca(T)16attttgggg(T)10	50	-	CTGTTTTGGGGTTGGAGAAG	ACATGCGGATTTCTACCCTG
chr1	1204205	1204633	c	(AAT)5t(A)16ggaaatgaaagggtatgggaaaaagggtgaaaagaagggatgggcgggttagtcaggtcaaagtcaatggtcaaggtatcaagtc(TA)6	129	-	CCTTTCTCTTGCAAAGGTGC	CACCCTTTTTCCCATACCCT
chr1	1212619	1212972	p2	(TA)27	54	-	TGGATCTCTCTCATGTTGAGCA	TGAACAACAAGCCAACCTCA
chr1	1213173	1213557	c	(AG)6atatgggttta(CT)20(AT)11	85	-	TCGATTGGGATGGTTTGATT	TAGGGTGCTGAACATTTCCC
chr1	1214192	1214547	c	(A)11cagagtgaactcgtccaccctctctcgaatgaa(CT)6	56	-	TTAAGCCGTCGGATATGAGG	AAGAGAGAGGGAGGAGGCAC
chr1	1218342	1218724	c	(AAT)5acaaataataaatttcttgcatccaacatctaagaagtcattatgagtgatgttga(T)12	83	-	TGCATCCAACATCTAAGAAGTCA	ATGAAGATGTGGTCGAGCG
chr1	1231045	1231430	c	(AT)11(TA)32	86	-	AGATGGAAGGGGCAAGAGAT	AGAGTGGATGGTTTCTGAGCA
chr1	1249276	1249639	p2	(TA)32	64	-	TGTGGCAGCCATAATTCAAA	GGTCATTCCAACACGACTCA
chr1	1252528	1252892	c	(T)13ataggaagccttggccaagtgtacctaacacttgttagt(A)13	65	-	CGAGTCAAGTCGAATAATTTCAA	CCCTTGACCTCAGTCGGATA
chr1	1265411	1265840	c	(T)20gagattctatttaattccttcagtaaaataaaataaaaaaggtttacattttacctacttaacagaacttcctgtgtgaatggaatccagagag(GA)8	130	-	CTGGCCTGCAATCTCTCAGT	TGGATTCCATTCACACAGGA
chr1	1295608	1296190	c	(A)16gaaggattcaacaatgaaaaatttgacagctcaaggtctttgaacatgggctatttttacatttacgccccccgct(C)26ttagatccaaccgcttagtgacattgaattttcccaacctacattaatttgatgatttctgcctgtc(A)16gtaggattcaacaatgaaaaatttgacagctcaaggtctttgaacatgggctatttttacatttatg(C)15	283	-	CAAGGTCTTTGAACATGGGC	TCCTTTTTGTGGAAGTGGGT
chr1	1314014	1314363	p2	(AT)25	50	-	CACGTGCCGATGTTGTTTTA	AAGAAGGTTGTTGTGGTCGG
chr1	1318468	1318853	c	(T)14aaatatttggataagctaaagacctgcatgttggtttatgattctaacttaaggc(T)17	86	-	CTCAAATGTGCAACCACCAC	CCACAATGAGGGGCTTACAG
chr1	1320397	1320753	c	(C)27tc(A)14(CA)7	57	-	CGACACCAATTCGATTCCTT	GGGCATTTTCATGTTGGTTT
chr1	1330748	1331277	c	(A)18ttttgatgttctggtccgtacttgaagcacggaccagccaaaaggtgttaggtccgtgcatgaaaaacggacccaaaaaaaaat(A)18ttttgatgttctggtccgtacttgaagcacggaccagccaaaaagtgttaggtccgtacttgaaaaacggaccct(A)24(T)11	230	-	AACAGTGCAAGGTTGGAAGG	TAACACCTTTTGGCTGGTCC
chr1	1342492	1342844	c	(A)24cctattttcttttc(A)15	53	-	CTCTTCCAAGGCATGGATTC	AGGGTCCCTGTTTTAATGCC
chr1	1347136	1347567	c	(CT)7tttgaatctgtctctctctctatctcaaatcta(TC)8ttactcgaatatcaactctctaagtttcgatatagtgtatctctctctgtcactcga(CT)6	132	-	CGCTCTTCTCGCTCTCTCTC	GCCCTAAAACTTGCAAATCG
chr1	1349216	1349573	c	(CT)17(AT)12	58	-	GGTTCCTGCAACACACATTG	GGATGATCCCCTCATCACAG
chr1	1385126	1385672	c	(A)10ctccaaaaagaaaagttgttaggactgacataaggaacaaaatgagc(A)10ttt(TA)17(AT)24ttttggtccgtttttcaagtacggacctaacactttttggctggtccgtgcttcaaatacggaccagaacatcaaaa(T)18	247	-	CGGACCTAACACTTTTTGGC	CTTAGAAAACGGACTGGGCA
chr1	1394188	1394596	c	(AG)10ttataaaaaatgagagagagacgatggtagcaacaaacaaagagtttgaaccactcc(AG)16	109	-	GAGTGCAAAAATGGGGTGTC	ATTTGTTGCCATCATCACCA
chr1	1395956	1396437	c	(TC)15agtcgctccctcgatcgacctctcgatctca(TC)13aatcgctccttcgatcaacctcttagtctttctcttagtcgctttctcagcctctccctcgatcgacctctcgatctca(TC)8	182	-	CTCTCTCAATCGCTCCTTCG	GCCCCCAATGTCTCCTTACT
chr1	1397487	1397838	p2	(AT)26	52	SSR-1	GGCGCTTTAGGTTCAGGGTA	TTCACACCTAATCCCACACG
chr1	1404332	1404719	c	(AT)19aatatatatattat(TA)18	88	-	AGTGCCCCCACTCTAAATCC	TCCCTCCGCCTTCTCTAGTT
chr1	1408522	1408950	c	(A)16gaatatagggggaatcaaggaaacaatgttacattggaatacatttgatgcattttaatcctcttttagtcgagaaaccaacgaacaga(TC)12	129	-	GGGGGAATCAAGGAAACAAT	AGAAGCTAATGGCGATCCCT
chr1	1410689	1411051	c	(G)20aattgcccccaaaagaa(T)26	63	-	GGAACATGGGATAAGGAGCA	ATGGAGGCAAATGGAGAGTG
chr1	1437658	1438041	c	(A)12ttataaatggatctatgagtatatgaggtatgagtacgacctgaaaaataaaacaaatgga(T)11	84	-	TTTTTGCGCATCTCTGTCAC	AAACATGCCACGTGCCTC
chr1	1443154	1443513	p2	(TA)30	60	-	GTCCCTTGAACCTGACCCTA	GAAGCGATCGGAAGCTCTAA
chr1	1452742	1453096	c	(AT)14acatagatgaac(A)15	55	-	AACATTCGGAGGTCACCAAC	TCAACGGACGAGATCATTTG
chr1	1462224	1462607	c	(TGC)8tgttgctgc(TGT)5tgctgctgctgctgttgt(TGC)6	84	-	TTTCTTTGCATCTGTGGCTG	GCAGAATTCAAATGGGCAGT
chr1	1500198	1500619	c	(A)11caaatgaaattaatggtagaaaccaatgaaatcaaaaacagcattgaagtccaaaattaatcattcaaggttttgcaggagg(A)11(G)18	122	-	CAAGGTTTTGCAGGAGGAAA	ATTGTTCAATGGCTCGAAGG
chr1	1522288	1522673	c	(A)11tcgacacctaaaaataaatataaataaataaataaaaaattatattatcgaaaaacaaataat(A)12	86	-	TGATCATTATCCCGTCCTCA	GGGTGCACTTTATTTTTGGG
chr1	1540977	1541351	c	(AT)9a(AT)28	75	-	AATGCCTGAAGGGATAGTGC	TCATATGCGTCTCATACCACG
chr1	1557850	1558258	c	(A)30gacttgagagtattttaccggatggtagtttttaatatatgaataatgataattcacgaaaaaaa(AT)7	109	-	TCAACGTGATGGGTCAAAAA	TCAGCCCATTCCAAAACTTC
chr1	1579539	1579991	c	(T)11atttttaagcccacgaaggcaagttgtatagattttaggatttttattttgttctcgtttatatgtccccctaggtaaaatggggaaatctg(T)18atgttatcatgtgcatcatc(A)12	153	-	CCCCTAGGTAAAATGGGGAA	CAAACACGGACCAGAACCTT
chr1	1579889	1580300	c	(A)10ttttgatgttctggtccgtacttgaagcacggaccagccaaaaaatgctaggtccgtacttgaaaaacggaccccg(A)26	112	-	AACAGGGCAATTGTGGAAAG	CCGTTTTTCAAGTACGGACC
chr1	1588509	1588953	c	(A)31ggtcaaaaagaaagagacaaaagaaaagaaagtcaaaaagtcaaaacatcaagtactcctggcccgcatgaggataaactgtgaacggctaaaatac(A)17	145	-	CCCGCATGAGGATAAACTGT	TATGTCTCCTCCCAGCGTCT
chr1	1590749	1591204	c	(A)10tcaaaaaatcaaaaaatcaaaaaaatcaaaaaatcaaaaaaaaatcaaagagtcaaaaac(A)10taataaaggaaaatctcaaaaaaatc(A)12tc(A)13tcaatcaaagaat(A)10	156	-	TGGCAACTGTCAACAACCAT	AGCTTTCGCAAAAGTGCTGT
chr1	1594735	1595090	c	(TC)9agatctttaaatcttgatcaagtgtt(TC)6	56	-	CTTTCGCTCTCTCGCAAATC	TTCCAAAAACAAATCCGCTC
chr1	1604488	1604840	c	(T)15caaacctaaagtttttattatttattta(T)10	53	-	TGGGGATATAAGGGGGACAT	TGGAAATCACTCACCCATGA
chr1	1605973	1606388	c	(A)10ccaatgttttacaaattgaaatgacgattcaaccaaaattttgattaattggccggactgggttcaatttggtggaaccactttgtatttgt(TA)7	116	-	ACTGGGTTCAATTTGGTGGA	AAACATTTTGGCAGCGTTTT
chr1	1609405	1609829	c	(T)13attctttga(T)10aatttttttgattttttgatttttttttgattttttgattttgattttgattttgatttttgatttttgatttttgatttttg(T)10	125	-	CTCGTGTGAGGTCTCGGATT	GCATTGTTGCAAAAGCTCAA
chr1	1623602	1624019	c	(T)13gtattttagccgttcacagtttatcctcatgcgggccaggagtaacttgatgctttggctttttggattttcttttcttttgtcttttttccttc(T)10	118	-	CGTCTCCCGAACTTGCTTAG	CCCGCATGAGGATAAACTGT
chr1	1633294	1633797	c	(T)17gtccgtttttcaagtacggacccaccattttttggctggtccgtgcttcaagtatggaccataacatcaaa(T)23ataatttttttggggtccgtttttcaagtacggacctaccaatttttggctagttcatgcttcaaatacggaccagaacatc(A)11	204	-	TGGGGTCCGTTTTTCAAGTA	AAAACATGGGCAAAAACGAG
chr1	1647965	1648481	c	(CAC)7cattacactaacatcgcgtcgtcgtcgactccgtcgccgtcgactccgtctccgaccacct(TC)6ttcttctttttcttcttctccatccctcacctcctccg(CCA)6cgttctccctcccatctttctcacttacttccgtcaccgccgccaccgccac(CGT)5	217	-	TTTTCCACCCCATTCAAAAA	GGTGGTGGTGTTAGGGAAGA
chr1	1662995	1663350	p2	(AT)28	56	-	CCTCACCAAAAATCAGCCAT	ATGGGAAATGTTCAACACCC
chr1	1664418	1664777	c	(A)13taaaataaaatcaaatgggtttt(GA)12	60	-	GACCGATTCGACCTGTCAGT	CCCTCATCGTTTTCCACAAT
chr1	1664693	1665128	c	(GA)8ggtgccaatggatagccgacgaagacaatggttatgaagttcgcccgcatgggttttaccgagag(AGA)7gagaggagagagaagagaga(AG)7	136	-	ATAGCCGACGAAGACAATGG	ATGCAGGTACGCATTTTTCC
chr1	1671772	1672193	c	(TTC)6agagaaggaatggatgagttaaaattgtcactaatgaggacgatgataaggtggggtatatgtctatactcaattaaaggccaccttttcag(A)12	122	-	AGGAAAGTTGCCACCAGAGA	AACCAAAAGCGAACCAGTTG
chr1	1676139	1676547	c	(TA)18tcttaaagagggtatagaacatgcataaaagatttctagtctttctatggt(TA)11	109	-	ATTACGACCCCCTTTTGGAC	GGATGATCCCCTCACCATAG
chr1	1676629	1676992	p2	(AT)32	64	-	GGATGATCCCCTCACCATAG	TTACAACCCCCTTTTGGACC
chr1	1677185	1677589	c	(ACC)7actaccattacactaacctcaccgtcgtcgttaccatcgtcgtcgccgtcgactctgtctccgaccacct(TC)7	105	-	TTTTCCACCCCATTCAAAAA	ATGGTAGTGGTGGTGGTGGT
chr1	1693154	1693570	c	(A)10ttccctcaaaagaactatttttttggagccggtcaaatcttaagtttaaaaatgatggtcattgaattcctagattttaaatttaaatccaatagtg(A)10	117	-	GACCATCTAGGGTATGGGCA	AGGGCTGAGATGTCATTTGG
chr1	1718120	1718587	c	(T)11aaa(T)10aaatgtttttttttattttcaaaag(T)10aacgtttattagtttttgattttttattattatttttatatatattttttaaaaaatagtatttttatttttttttaattttccttaaatggtttaaaa(T)10	168	-	AGGGTCCCTTTTAGGCGAT	CGTTTAAAGAAAACGTGTTGAAA
chr1	1735145	1735535	c	(A)12ccaagagagttggttgttggaatgttggataattgcatcaacatatt(A)32	91	-	ATCCTCCCTCGCAACCTTAT	TGGGTTTGAAAACTCATCCC
chr1	1745019	1745444	c	(TA)8aatctaattaataattatttatgaaaaagtattattttttgtaaaattacaaaaaagaatcaaaattggcacttgaaatagcgcaatttagttttttga(T)11	126	-	ATCACTTCAAGGGGCACAAC	GCCACTCTAAGTGCCGAAAT
chr1	1765921	1766352	c	(TA)18g(AT)6agatatatattataagcaatatggattaagttatgatgagaaaataactcatagaatttaaggaaaattat(A)12	132	-	GGTGTGTCGCAATGTGAGTC	CAGCCCTTACATGATCGGTT
chr1	1766941	1767293	c	(T)11aattta(AG)9aa(AG)8	53	-	CAACGGACATTGATTGATCG	TGCCATTCCATGTCCTCTAA
chr1	1770342	1770748	c	(A)11tgctttagacttttttattggaaaaattattaaaaagataattatttaattattatttattaaaaaataatattttttgaaattt(A)11	107	-	CCCAATAGAGGTGTGGCTGT	GTGGGGGTATGACATAGCGT
chr1	1791257	1791669	c	(T)17ggtaagacttcattacattgatgtatgtgaacatgatctcaggaatacttccaatatgtgagattaaaattgacttatataagtaa(T)10	113	-	TGAAGCAGTCCCCAAGAAAG	ATTGGACGTGTCATCCCATT
chr1	1830532	1830947	c	(T)11ggttttgaaatgtaaaggtcatttttgcatgaataaaagcacttttcgtactcctcgtgttacctgttcttagttgcttatttctctcttctg(T)12	116	-	GATGCAGATGCCAGTCTTGA	CTTGGACAAATGACGAGCCT
chr1	1839825	1840189	c	(A)21ccttcatcaattaaagtggcacaatttttattaa(T)10	65	-	AACCTTCATCAATTAAAGTGGCA	GCCTCCATTGATTGTTCTTGA
chr1	1842774	1843209	c	(T)14cagtttaattgataagtaacaagcgtgaaaataaatttg(A)16tcatacattaaaaggaacaaatgaatttttgatttttttttataattttttttgac(A)11	136	-	TCAAACGAAAATCAACTTGTGG	AACTCAAAAGCTAAGGGCCTG
chr1	1843535	1843934	c	(T)18attggaagttaatcaagtacaaatcccggcccatgatttcaaatcatcttctctaaacagatttttttggg(A)11	100	-	GTCATGCAAATAGTGCCACG	GTACCCATCGGAGTTTGTCG
chr1	1854047	1854434	c	(TA)23(GA)21	88	-	TGGAACCAAAATCTCCACTCA	GCAAACCTCCCAGTCTTCTG
chr1	1862256	1862613	c	(TA)10(GA)19	58	-	GGTGTGTCGCAATGTGAGTC	GCAAACCTCCCAGTCTTCTG
chr1	1882369	1883012	c	(AG)7aagtttcagattttgggggttttcgagttctccgact(GA)12(TA)7tgaagccaacgaattaaagagggaagatattgagaggtcgttcgagggagcgact(GA)9tgagatctaagagagcgactgggagatcgagagatgagatc(GA)7gctcgatcgagggagctact(GA)10gctcgatcgagggagctacta(AG)6ataagatc(GA)7gctcgatcgagggagctgct(GA)6	344	-	CGATCGAGGGAGCTACTGAG	TCACCGTATTGGAACGAACA
chr1	1887006	1887429	c*	(A)10(AAT)5*tgtttggacttgatcatgattttgttgaactccaattgagatcccaaatttaaaattaaaatgtagaagtgaaaaataatctatc(AT)8	124	-	TGGCAATCAAACATTAGAGCC	GTCCCTTGAACTGCCCCTAT
chr1	1894272	1894691	c	(A)13ttggtaatttttggataaattaaattaaagataagtttcacatgcaatagaatttgtaattgatagaatttgctttttcgacgttcctctgttggc(A)11	120	-	CAATGTGGATGGAGCCTCTT	AGAGGAACGTCGAAAAAGCA
chr1	1900322	1900737	c	(A)16tcaaaattgagagttacctctctctgtcgaggttcagtcgacaaatctgtttagaaactcaattttgattttttttcaaatggtttttat(A)10	116	-	TCGACTGAACCTCGCTTTCT	TGTCGACTGAACCTCGACAG
chr1	1912272	1912664	c	(T)11aatttgtttcacctgactaagtgggatagtatagccgagccaggggaaacaaatagacataaatggttgaag(A)10	93	-	GCTCCAAACTTGAAAACCGA	GCCCAAATGCTTGAAGTAGG
chr1	1936656	1937064	c	(A)17ggatattaattttaaagaattaactaataatttattttccattgaacatatttaatgatatttattaattttgaatt(TTA)5	109	-	TCCACATCAACGTGTGTCAA	TGGTCAAATCTGTCAAGCTCA
chr1	1948110	1948459	p2	(TA)25	50	-	TTTTCGGATTGGTTCGATTC	CGGATTAAACACACACACGG
chr1	1960168	1960596	c	(CT)10catctcctctgccat(CAC)5gctttcccctcatctttctcatcatcttcttcctcacttacctccaccgccaccgtcgtcaccg(CCA)5	129	-	ATAACCTCGTCGTCGTCACC	CGGTGGAGGTAAGTGAGGAA
chr1	1965905	1966269	c	(T)14agggtctaaggccttcaaggccttcaaggaatttaga(G)14	65	-	GGGTTTGGAAAGAGCGAAAT	AAAAGCAAGATCGGCTGAGA
chr1	1978401	1978808	c	(T)11aaaaagagaacactaaggtcaaggaggcatgtcataagtctgaaaacaaaaatcaaaatgtctgaggttatatctataattaccct(A)11	108	-	GGGAACAAGGTGAGGTTGAA	ATGACATGCCTCCTTGACCT
chr1	1980156	1980550	c	(TTC)5ttttgggagggtattttctttttttgttattattttcttcttttttttcttttgggaggg(T)20	95	-	TCGGCAAAAGATGACCCTAC	TGCCCACTCAACTTGTTTTG
chr1	1998452	1998807	c	(A)11catcatttatatattctttgaattttatttattta(T)10	56	-	TCCTTGAATTAAAACCCACCA	TTGCCCTTTTAGACATAATTCCA
chr1	2009928	2010390	c	(T)10aataaatcaagatttgagggtattctattcaatgttt(TTA)9atttagttgaacataaccaatatattgcaatatggtaataaggggcaacttgaatatttcctacttaaaaattaaatat(A)10	163	-	GGATTGGGTGGGAGAAAAAT	TCAAGTTGCCCCTTATTACCA
chr1	2037574	2038108	c	(A)18tcgatctcatcaataaatttgaataatggacggccattgaactcccaaatataaagaagtgatttttcttcattatc(T)11caaatgtggctttatctcaatcgaaccgggatttagtcaacagagatacatggtgacaatttaacaataatttgtctttc(T)10acaattccaatggcagccgacagccat(A)12	235	-	TCAATCGAACCGGGATTTAG	TTCAGAGCTCCCTTGCAGAT
chr1	2051742	2052137	c	(T)13ggtcaagtcaag(T)10attgttttaatcgtgaggcacaaaatgagttttaaatgagactttttc(A)13	96	-	TCACAAACAACCACAAGACCA	TTTTGATCAATTTGCCCCAT
chr1	2063114	2063536	c	(A)10tcctaaactcaaaattcatgttatccttacacccaccctttaacttcaattctataatacgtggttaaaaatcacctataaaaaaaaat(AATA)6	123	-	AACGGGGCCGTAGTTACTTT	AAGGGTGGGTGTAAGGATAACA
chr1	2073202	2073571	c	(TA)7tga(T)12aaattttcaaaatctgtcattttctctcc(T)12	70	-	ATGCCCCATTGACCTTGATA	GCATCCGTTGACAACCCTAT
chr1	2089947	2090368	c	(T)13atgagtgctaaacttaattttcttactttgaacattaagataattttatattataatttattaaattaaacttatcataaaatccaataataataaaat(A)10	122	-	AGCTATCGAATTGAAGCGGA	TGGAGTTTGTTGCATGGTTT
chr1	2100918	2101383	c	(A)12tacaaggcatccttacgttgcccaaattcctaaaactgccacccatgtatctctgcccccttaaaaagcag(T)10aatatatataattgagtttttcaaaataccacagctttcaataagttggtttgtgataaaag(A)11	166	-	CGTTGCCCAAATTCCTAAAA	ACTCCTTGGTGCACCTCACT
chr1	2105935	2106308	c*	(C)13(CA)8*ccaaa(AT)12a(AT)8	74	-	TGCCACAATGGAATTGAGAA	TGACAAAGGAAAACTTGGGG
chr1	2118296	2118686	c	(A)11gagagattttgaatttaagcattcttttggtcacccttagggatttttctttcaataacctgatatgttt(G)10	91	-	TTGGGTGCAATGGCTAAGAT	CTTGATCCGACCCGTTCTAA
chr1	2139028	2139451	c	(TAC)10tgtgtgtaacacaaaaacaaaagatttggcgttggacaatgtaaatggggaatatagtatataaccgcttctgttt(ATC)6	124	-	TATAAGAGGGTCACGGGTCG	CCAACGCCAAATCTTTTGTT
chr1	2140739	2141133	c	(A)10ccctcaattagaagagtgttcaaaaaccagttgtaatacttcatgaatggagaagtgcacaaca(C)21	95	-	AGCCCTCACCAATTTCAATG	TTTTGTGTGCATGTGTGTGG
chr1	2145905	2146268	c	(T)14gtggctaagtaaagattttattaattagcaaaaata(G)14	64	-	TCTATCCAACGTCTTTGCCC	GGTGGTCATCTCAATCACCC
chr1	2173873	2174329	c	(G)11aggcgtcaaaaaatattagacaatataaaatttacatttttactttttttaaattctcaatgcacacaccataacatatcgaacaaaaacttgatt(TC)25	157	-	ACCCCCATCACAGAATCGTA	CCCCTTTCTGACATACTTCCC
chr1	2196700	2197064	c	(T)11agacataagatatcaaatataaaattgaaagatttcaagaggac(A)10	65	-	GGGGAGGGATAAAGGTGGTA	GGCTTTCGAGTAAAATGGGG
chr1	2213789	2214142	c	(T)17gtgtgggcaaatgttagttac(A)16	54	-	TGAAAACACCATCTTCGGTG	AACATTTGCCCACACAAAAA
chr1	2227835	2228226	c	(T)16cgggttctttaatcggtttagattattttctcgattgtcgatcgtgagacgatccgaaaattttga(T)10	92	-	CATCTTTGGACGCACTGAGA	CACGATCGACAATCGAGAAA
chr1	2258344	2258868	c	(A)11tcatttttcctaacaaatggagtcatagttcctcattagatagttcataccaacaatggattcttccagcaaataaaaatttagaga(ATTT)5ttatttaaaggacacgaattctttgtttctagttgaaattgagaagggtaaggtaatatgagtgaatgtttatga(AG)16	225	-	CAATGGATTCTTCCAGCAAA	CCACGACTCCTCTCCTATGG
chr1	2310906	2311327	c	(AT)10aatagatactttggattagttcggttctcggattggtttggttctattgtacccctaatccaggaccgaatcaaatcaatggga(T)18	122	-	TAGTTCGGTTCTCGGATTGG	TGGATTGGATTGGTTTGGAT
chr1	2321242	2321648	c	(AT)9aattgctaactccctcactaagcaaaataagaacgaagtataaaggttattctacaatcacttatacatac(AT)9	107	-	TGCTAACTCCCTCACTAAGCAA	AACTTAGCAAGCTAGTGCCCC
chr1	2321963	2322328	c	(T)18gtacaaaattattgttatacaatgatactaaaatccc(T)11	66	-	AAAGCAAAGGAAGGGTGTCA	ATTCACAAGCCACCACATCA
chr1	2344305	2344855	c	(T)10ccccttttatctcctgaatttttcgatgattaacgttg(A)17gaggaaaatttgcttacctgatagagttgcagaggatggaaatagatgttcttgattgtaag(AT)35(AG)27	251	-	TTGGGACGAAGAGAATGAGG	CACCCATCGATTTCAATCCT
chr1	2347204	2347621	c	(A)14gtacccggagagggaacttgctttgttggtttaaaatgttctaaatgactcaaatttttaataaatagagactctcagaagaattaaaatt(A)13	118	-	TCCCTAAGAGGGAAATGGGT	TCCCTCTCCGGGTACTTTTT
chr1	2362104	2362471	p2	(AT)34	68	-	CTAGGTCCATGTTCGCCAAT	AAAAAGGTGTGTCGCAAAGG
chr1	2362541	2362902	p2	(TA)31	62	-	AAAAAGGTGTGTCGCAAAGG	TCTCATATGGCCCTTGAACC
chr1	2368609	2369023	c	(CT)6cagccgttccctcgaactccctttctcagtctctctctccatttcatctctctctcagtccctctctcgatctca(TC)14	115	-	GTTCCCTCGAACTCCCTTTC	ATTGAGGGAGCGAGAGATGA
chr1	2403627	2404101	c	(GA)14ggtttgagagagagtgaa(AG)9gcgttctgtcgataacgagaaggtttgagat(AG)6tgagagagaagggcatcgagtgaaagagaaaacagagagttaaactctctgaa(T)15	175	-	AGAGAAGGGCATCGAGTGAA	TCCAAAATTAGTGCCCCATC
chr1	2404831	2405210	p2	(AT)40	80	-	AAAGCTTAGGGTGCTGAACG	ATGGGCTGATTTTTGGTGAG
chr1	2405928	2406404	c	(TC)6gacagacgccttctctcttactctctcaaaccctctctcgatctcactctctcaaaccatctctcgatcgatagaaccc(CT)11ttca(CT)9caaacc(CT)7ttca(CT)9	177	-	TGTCGAACCCTCTCTCCATC	GAGTTCAGCGAAACCGAGAG
chr1	2418948	2419356	c	(AT)11tgccaaaatgtttgttgctgaacatttcc(AT)29	109	-	TCTACGGAACCCATCCCATA	AAAATCAGCCCATTGCAAAC
chr1	2419427	2419810	c	(AT)24aa(AG)17	84	-	ATGTGTCTACGGAACCCCAC	GGACTTCCCATTCCGAAACT
chr1	2452816	2453222	c	(T)14aagtttgaactaaatcgccactaattgagttttaaagtttgaatatttgaatcatgaatgcttttctttatcttacacatg(CA)6	107	-	ACATGCACACACACACATCAA	AAACCAGGAGGCAATGTCAG
chr1	2487375	2487724	p2	(TC)25	50	-	CTTTCGCGATTTAGCGTTTC	CTTGTGCCGGAATAGATGGT
chr1	2508863	2509251	c	(T)26cttctaagttcataataaaaatttcctctccagccctatgacatctgatcacg(T)10	89	-	TTTTAATGGCAAGGTGAGCC	TTGAAAAACATGGGCTTGACT
chr1	2522780	2523137	c	(AT)8(AG)21	58	-	AGTTGAAAAATCGTGGACCG	GGCAAAACATGGGTTAGAGG
chr1	2532773	2533122	p2	(AT)25	50	-	GGGAAATGTTCAGCACCCTA	CTGATTTTTGGGGAGGATGA
chr1	2533556	2533948	c	(AT)11gggctgtgatattttcaaccatg(AAT)6(TAT)10	93	-	TTCTCACCAAAAATCAGCCC	GGGAAATGTTCAGCACCCTA
chr1	2534466	2534841	p2	(AT)38	76	-	TCAGCCCATTCCAAAACTTC	AGGTATTGCACGTTCCTTGG
chr1	2540098	2540515	c	(AAT)8acttttttaagtgtatctaaatgggcttttaatatgatcaggacatggttgatccaaaatcaatccaatagatt(ATAA)5	118	-	CAGGACATGGTTGATCCAAA	CTAGGAAAGCGAGGGAATGC
chr1	2542220	2542602	c	(TAA)8tatttaagaaattggatgcatgactcatgactgttttggcaaatatt(A)12	83	-	TGACTCATGACTGTTTTGGCA	GAATGGGTTTTCACCTGCAC
chr1	2542558	2542955	c	(AT)22tttagaacataagttgatttctatgttacactttatcaatt(A)13	98	-	CACCAACCTTGCCTTCTCTAA	TGCTGAGCGATATCAAGACG
chr1	2545873	2546277	c	(T)10gaacgattcaaaatgttaaattattgggatgatcaatcaacctttatctttatataagtgtagttataaatgaaaatc(T)17	105	-	CTCCGCAATGATAGGGATTC	GGCTATTTGTACGATGCAGGA
chr1	2579897	2580323	c	(A)16cacgtttaaacatgactggtacctttaacaaaatacgagtttttttaaaagttgcgttttatttttatttgttatgttttaaaatcagtttttttcatt(A)12	127	-	TGATCAATTGGTTGTCCTCG	CGCAAAAACTTGTATTTGGTCA
chr1	2583257	2583651	c	(ATA)5aataaattatgtatatttatgttaag(AT)27	95	-	GCCCTAACTCTTTTGGTCCC	TCAGCCCATTCCAAAACTTC
chr1	2586983	2587408	c	(TA)20atatctaaaataaaaaataaaaattcatatttttttctttccaaaattagtgatttttactcacatggata(ATG)5	126	-	CATGTCCCTTGACTATGATCCTC	CCATCATCATCATCATTATCCA
chr1	2590869	2591265	c	(AG)11caatcaaagcttttttcttctttgtttcggaggtccaacgtcttctcatcaaagcgtctttga(CT)6	97	-	TGACAATCGGTTCTGCGTAA	GTTGGACCTCCGAAACAAAG
chr1	2594245	2594596	c	(CT)12(AT)14	52	-	ATCATGTTCTATCTGGGCGG	TCAGCCCATTCCAAAACTTC
chr1	2651376	2651795	c	(A)10gacttagagagtcagcaacaacattattgaaacaatattatattattcatataaaaatgaaaagaaataacaacaaaataaagaaaataaaatatt(TC)7	120	-	CCATGAAAGCACAATCACCA	CGATGTTTCCGTCTCTGGAT
chr1	2657873	2658273	c	(CT)6atatatcaagtacagatatcgccgctaatttagcgaaagaaccgctaaatccagcggcgtttctgtcctca(CT)9	101	-	CGGCTCCTTCTCTCTCTCCT	TGGATTTAGCGGTTCTTTCG
chr1	2660118	2660496	c	(AT)10agatatatatcttagagatttaattaaactattcaccaac(T)19	79	-	GCTTGAGATCAAAACCCTGC	GTCCAGCTTACCCATCCAAA
chr1	2700252	2700607	c	(T)10caacattcaagtataacgaagaagaatagatcg(A)13	56	-	CCCAATCCTCGAATTTTTCA	CATCATCTTCAACCTCCCTAAAA
chr1	2709834	2710249	c	(T)10atgcaattgaaaaaaataattcacggaattttccatattaagcctaacagtagaaaatgatcttcctaacaaatcattcgcctgacaaatg(T)15	116	-	CAAATCATTCGCCTGACAAA	TCCATTTGAGGAAAACGTCC
chr1	2723707	2724096	c	(A)18tccctaataaaaaatccaaaccctaaagataaatttaaacaaatcagagatataaattcg(A)12	90	-	AAAACCCAAACACCCACAAA	TCCGATTTGATGAAGACAAAAA
chr1	2731339	2731804	c	(T)10ctttcttgcaaagtgaatctcagctttgttattaggaaattttgcataaaaatttcctaggtttatgacaacagtaaaagaaagtggaaaatgtcaac(T)10aatactcaaaacaaaactatttgctacagtaac(T)15	166	-	GAGGGGGTTGAAGATGATTG	GCTGAGATTCACTTTGCAAGAA
chr1	2732547	2732926	p2	(AT)40	80	-	GGGCATTTATGTCCAAAAACA	AGCCCTATTTTCCCATTTCC
chr1	2780373	2780726	c*	(A)25(AT)15*	54	-	GTTCATACGCAAGAGTGCGA	AAAAGTTGGGGTGCCAATAG
chr1	2790372	2790749	c	(A)10tcagtcaaatctaaaacttctaaccccattaaaagtgatttaaaatgtggatcgttga(T)10	78	-	TGGGAATGGATCAAAGAACA	TCAACGATCCACATTTTAAATCA
chr1	2837159	2837509	c*	(ATATA)6(AT)13*	51	-	CTGGCATGTGATTACGCACT	TTCCAAACATTTTTGCCCAT
chr1	2842791	2843212	c	(AT)8ttgatactaagtgttttcatgaaatctagaggaccatggtgttggattgtaatttttccacatttaactgagtccttatgactgtgaattaag(T)13	122	-	GAGGACCATGGTGTTGGATT	AGGGTGGAATCCTTGATTGA
chr1	2844045	2844592	c	(CT)26tattaactttttcttctctaaaaggaaactcataacaattttaataaggacttaaacagaaagaagaaa(AAG)7gaaacaaggtctcaaaataggttagagactaaaatattgcactccctctctcccctctccacctccttcttttaccccctttcctcactcctttaa(T)10	248	-	TACCCCCTTTCCTCACTCCT	TGGATGGGGATTAAAGATGC
chr1	2873843	2874228	c	(A)10tccttatttactcttcccgaaacttttaatctttaattaactcacatagatgatg(ATC)7	86	-	GATTTTTGAAGTGAAAACCTCG	CAAATCAGTTTGATGATGATGATG
chr1	2876180	2876612	c	(AT)21aattttcttgttctttttttgaatgtgaggttttccatggattgccaatttggtaattcctgtgggctcaagtgg(T)16	133	-	TGATTTTTGGCGAGGATGAT	GAGCCCACAGGAATTACCAA
chr1	2885577	2885939	c	(T)12attattgataagtt(C)23(A)14	63	-	ACATTGACCAGAAGATGGGG	AGCAAAATTGGGGTCCTTCT
chr1	2969262	2969622	c	(T)16ctttttttgtaattttttatgtgcgttgactgg(A)12	61	-	TGATTCCCTGTTTTCCACAA	CGAGAAACCTACTGCCACCT
chr1	2985363	2985744	p2	(AT)41	82	-	TGCACCAAAAATGATCAGAA	TTTAAGAGGAGATGCTGCCG
chr1	3005418	3005838	c	(T)12gggaagttctactctacctactcggagtgaaagagtaataaactaatttttttgggagtcctactctacctgcccagggtgaaagagtaatgaactaa(T)11	121	-	TGCCCAGGGTGAAAGAGTAA	CCTGGGCAGGTAGAGTAGGA
chr1	3006176	3006584	c	(T)10ggaaagttctattctacctgcccatagtgcaagaataatgaactaagctttgagggaacaaacgggggattaacctcgcatttga(T)14	109	-	CCTGCCCATAGTGCAAGAAT	CCAACCCCAAAGGATAAGGT
chr1	3052579	3052987	c	(GA)7aagacggagagatggccgactgtcagagttgagaggcagtccgcagccactagccactaaccgcttgccttacaactta(AG)8	109	-	GCAGCCACTAGCCACTAACC	CCCCTCCCTCTCTCTCTCAT
chr1	3090009	3090376	p2	(AT)34	68	-	TAGACGGTTTCTCAGACGGC	TCCCAACACGAGAAGAGTGA
chr1	3126090	3126441	c	(CT)10(TC)16	52	-	CCTCCACGTTCCTTCATTGT	CCATGGACGACTGGACTTTT
chr1	3188181	3188558	c	(CA)17aaatccccttgatc(T)14g(A)15	78	-	CCATGGTCAAGAGGGGTATG	GGGGATTTTGTGTGTGTGTG
chr1	3192509	3192860	c	(AT)6tttgtataactttgcttttgaggg(T)16	52	-	TCCAATAATGGAGAAAACCCA	TCCGAGGATGGATTAGACGA
chr1	3194304	3194683	c	(A)10taagtagtacaggtgccaataaaagttttcttaaa(T)10ctagatttc(TA)8	80	-	TGTGGTGTAGGATTTGGAAAGA	AAGTTGGGAGTGCCAATAGC
chr1	3234656	3235139	c	(A)13cattttttttcctctgatcgctctccatttgttttcttcttctcctccttcgatcgacta(TC)7catgttttcttctctcctctagctctggttctcctcgctcgagttgtctgaatcgttggagggtggggggagtgcccta(AT)9	184	-	TCCTCTGATCGCTCTCCATT	TTTGAGGCGATAACTGACCC
chr1	3235803	3236246	c	(A)12tcatgattaatcgtcaatttttgaaaaaccaaaattttttttctaaaagattga(T)10aaaataatcatggtttaatcgacaactattaaaatcgtgatttaatcttgacttcttt(A)10	144	-	TTGAAGTGGCACATGTCGTT	TTTTGGTGTCCAACCACTTC
chr1	3241293	3241656	c	(AT)9aatatatatata(AT)17	64	-	CTGATTTTTGGGGAGGATGA	GGGAAATGTTCAGCACCCTA
chr1	3263271	3263672	c	(T)13actttaatcataaaataatataatggtactctttgaaatctcgtttaaaatgctttttatatgttctttataattta(AT)6	102	-	TTGGCGTGCATATAACCCTA	TGAGTCATGTCGGAGTGACA
chr1	3286470	3286866	c	(TA)12tggattaggatctgtatacacataaagctactcaaaaagctacaacgtgttttgtct(TA)8	97	-	TCCTCATCAAGCCTTAGTTTTCTT	CAAAACACGTTGTAGCTTTTTGA
chr1	3360036	3360390	c	(AT)17a(AT)10	55	-	AAACTTTAGGGCTGCCGAAC	TCGTGGGTTGATGTAACAGG
chr1	3410299	3410685	c	(TC)6tttcactcatctagagaatgattcagtgttattttctctatggtattatattgatc(T)19	87	-	TCGATTTGGAATTAGGTTTTGG	TGACAAAGCAGAGCTGGATG
chr1	3412193	3412577	c	(AT)9acatatatccaaatttaatatccaaatctaatagtagtaaaaaattacttagc(A)14	85	-	GGCCCAAATAACTCCTCACA	ATGCGTTGGGATACACGATT
chr1	3414211	3414625	c	(A)13gttatgtcttatatgaacaatttatggagcatttccatcattaatggtttatcatgcaaatttgaatttatgaaatatgagt(TC)10	115	-	GGTGGTGGGGGTATAGGACT	TGGGATAATTCCATGCATCC
chr1	3414942	3415329	c	(T)10ccgaagaacgacatgtgaaaggtaggtttcaatggtttcagcatttgtttgtttgtttgtttttttg(T)11	88	-	TCCGAAGAACGACATGTGAA	ATGAGCGCGAAATGCTCTAT
chr1	3419586	3419953	c	(A)13ggagtcaagtgatcctgaccc(AT)11(TA)6	68	-	TTATTTGAGGCTTTCTCGGC	TGTCGGAATGTTTCGACTGA
chr1	3454385	3454789	c	(AG)8aaaaacgtctccttatctttcttaatgggtttagatgcactaatgattgcaatcgtggctccttagatttt(AG)9	105	-	TGTGAAGAGCGGAGATGTTG	ATCTAAGGAGCCACGATTGC
chr1	3480832	3481187	p2	(AT)28	56	-	TCTTACATGGCTATGTGATATATTTGG	TTATCCGATGTATCTGAAAATAATATG
chr1	3489502	3489878	c	(TA)7(AT)9(TA)9t(TA)13	77	-	TCTCATATGGCCCTTGAACC	ACGTATGAGCTTGGTGGTCC
chr1	3497574	3497923	c	(AT)7(TA)18	50	-	GGTGTGAGTCGAATGAAGCA	TCCTTATCAAAAGTGGGCGT
chr1	3522804	3523238	c	(A)10tccgattgatttagtttggttccggattaagggtataatacaaccgaactaatccgaagtatat(TA)7ttgtactaatttttatgtgctttaacaatagattt(A)12	135	-	CTAGGGGTGCACACTGGATT	CCCTTAATCCGGAACCAAAC
chr1	3538249	3538621	c	(T)15atctctgacactgagtgacagccaaatgagtgagaaatactctt(TC)7	73	-	AGGAGCGGATCAAAAGGACT	AAAACGCTGGTTTACATCCG
chr1	3542010	3542430	c	(T)17aagtcgaaaaatgaaaataggtgggttttactaccgtcgaactcactactttatatttttttggttcaattttttattgttgagtttgacattt(A)10	121	-	TTTTTGCTTCGCTTTTGGAT	CGACGGTAGTAAAACCCACC
chr1	3542600	3543047	c	(A)10tcccttcactaatgtcttttaagtaattttctttttataatttagataatttaggaat(C)11tatcaacacgtggacttgtgagatagtagatccaagaaaatctgaaattctggattgac(T)10	148	-	AGGTGAAAAGGGGAGCAGTT	AGTCCACGTGTTGATAGGGG
chr1	3575076	3575437	c	(TA)11(AT)8tatagt(TA)9	62	-	ATCAATTTAATGGTGCGGGA	TTCCAAACATTTTTGCCCAT
chr1	3620861	3621266	c	(TA)24(GA)9(AG)6(GA)14	106	-	ATCCTGTGCAGAGAAGGAGAA	CTCTGGAAGCTCTGGAGGAA
chr1	3635160	3635798	c	(A)16tttgatgttctggttcgtacttgaagcacggaccagccaaaaagtgttaggtccgtgcatgagaaacggaccc(A)14ttttttttgatgttttggtccgtacttgaagcacggaccagccaaaaggtgttaggtccgtgcatgaaaaacggaccc(A)28tttttgatgttctggtccatacttgaagcacggaccagccaaaaagtgttaggtccgtacttgaaaaacggatctt(A)18g(A)12gaaaaaagaaa(T)12	339	-	TGCTTAGAAAACGGACTGGG	TAACACCTTTTGGCTGGTCC
chr1	3648026	3648403	c	(A)11tcatcaac(A)12tcaaaaataataaaataaaaaataaaaaaatctcg(A)12	78	-	ACGGCAAAACTCTCTCTGGA	CTCGTGTGAGGTCTCGGATT
chr1	3656290	3656649	c	(TC)9agataagtataaggatttagtggactgccact(A)10	60	-	CATGGGACGGCATTAGAGAT	TTACTTCACCCACGCAACAA
chr1	3676448	3676901	c	(AG)17acctattagaagggaatatttcttccactaacattgaaaccctagatgttgaggagatgaaatgagcttgatacacagagagagtt(AG)9(TG)8	154	-	GTGTGTGCGTTTTTCACAGG	GCGACGCATTTTTAGTGACA
chr1	3679538	3679903	p2	(TA)33	66	-	TCAAAGCATTTAGTGCAAACAA	TCGTTAGGGTCTGCCCTATG
chr1	3706077	3706434	c	(TC)8tttctttttctttgatttagtggactgccact(A)10	58	-	GCGGCATCAGAACATAGTCA	TGGCAGTCCACTAAATCAAAGA
chr1	3711640	3712020	c	(AT)6(TA)13g(AT)6ag(AT)14	81	-	CATTATCGTTGGCTGCAGATT	TGCAATAATTAAGTTTGGGGG
chr1	3737614	3738093	c	(C)10acccccacccccaccccctttttttcctaatatttgagcaggatttcattaaaaaagagg(A)10tgtacaaagtggcatacccttgattacaaaaggctgaaagtcatgacaacgagctccaaatgtggcccgattct(C)26	180	-	CGGAGGTTTCTACCTACCCC	GGAGAGTTGGAGCTCGTTTG
chr1	3756563	3756931	c	(T)10gcttttccttcaactatttcatcggaacaaaagacaattgacaagttaa(T)10	69	-	TATGGGGCATCACACACAAC	TTGTCAATTGTCTTTTGTTCCG
chr1	3763067	3763536	c	(C)11t(TC)10tttgtctcgctccagttacagacactctcttccaaactt(TC)8aagttaagttcgaacaaccgaacgattcttaccattgtcgttttcacacactctcgctatcgccg(TC)9	170	-	TCGTTTTCACACACTCTCGC	GCCAACTTGAAAAAGGAGGA
chr1	3773088	3773499	c	(TA)8(T)15agtatcttactttattatttttcatcgtttacccttttaatcttaaatttttttaataataccctttgaac(T)10	112	-	TGGGGATGAACTTCTCATCAA	AATGGGATCGTTAAATGCGT
chr1	3788489	3788905	c*	(T)10ataataccctctaactttattttttatctttcactttcactctttaatccgacttgagggccaacaatgctacattt(TG)8(G)15*	117	-	TTTGTGTGTGTGTGTGTGGG	GGCATGAAGGGTAAAGAAAATG
chr1	3795817	3796210	c	(GA)7(AG)9aagagtgagtgagtgtgagaaagaaagaaagaaagattttcatttttg(A)14	94	-	GTGAGTGACCCAGATTGGTG	TTTCTTTCTTTCTCACACTCACTCA
chr1	3819093	3819528	c	(CA)19(TA)21t(TA)16g(AT)11	136	-	TGTTTGATGAATGGGACACG	TTTGCCTCTGATCCAAGTCC
chr1	3822292	3822671	c	(T)10ccctttggatatgtcatggtccttggacaattttattattagtttttgtttttggtg(A)13	80	-	ACGACAGCAACATACATGGC	CAAGCACACCCCTCCTTAAA
chr1	3823733	3824084	c	(A)10tgtgttcctctaagtttgtttttaaatc(A)14	52	-	CCATACCAAGTCGCCTTTTG	GAAATGACAATCGTTGGGCT
chr1	3868856	3869355	c	(A)16ctaaaatctctcatcatctctcatcaaatctcatactaatcttctacaaaaacaaaatggtacattctcccatatgccattaaggacctaagaagcat(AGA)5aagaaggaaaagaaaagtgatcttgaagatacaaggtgggtttgtagtacacccccc(CT)7	200	-	TCCTCTCCTCCTCCCTCTTC	TTCGTTTTTGTCCCGAACAT
chr1	3870335	3870793	c	(T)11caaaactcttggtggatctcgaaaacaataaatttattgtatatttgttttcaatgtatgcaggttggaggacataggttaaaagta(AT)15a(AT)15	159	-	TGTATGCAGGTTGGAGGACA	TCCGCTGCAATAGATCCTTTA
chr1	3876574	3877121	c	(TTA)5atataaattgcatacaattaaacaaactaagtatcatatgc(ATAA)5taaaagaaaaaatagacatgtttgtaaataaatgccaaaatttttaaa(ATTT)5ttattttatttatataaattggtcgtcttcaactttcagccagatcctttcaacccgattttgatgcaacccaacagccaaaacactgtccg(A)12	248	-	TCAGCCAGATCCTTTCAACC	CGGTATTGGCCGAAATTTTA
chr1	3892027	3892481	c	(A)10taccttcataatcctacctatataaaaaacaaaaaaaacctaaaaatacataaaataaataccttcctaatcctattgagacacaaaacacataaatac(AT)23	155	-	AATGAATATTCGACGAGCCC	TTGTGTCTCAATAGGATTAGGAAGG
chr1	3919005	3919561	c	(T)13gggggtccgtttttaatgaacggaccgaaaagcttttgtattggtccgctctttaaaaacggaccagaaccttaatttttgc(A)12ttttatta(T)12aagattttgaggcacatagcctctgttttttggcttggggtacaaaa(T)12atgatgcaaagcataaaaatatatagagatttcccccttttacctaaggggatatgtaag(A)11	257	-	TAATGAACGGACCGAAAAGC	GTCCAAGTGGGCAAAGTTGT
chr1	3933213	3933671	c	(C)12tacggaaactcgacttataacaacgacttttaccgacggtcagattttgaccgtcgatatagagtcatttagaccatcaacccacgt(TC)30	159	-	CTCAAAGTTCTATGGGGGCA	CCGTCGGTAAAAGTCGTTGT
chr1	3933757	3934160	c	(T)16ggttatttcttttgatttgtgaggttgagctatcgg(TC)11(TA)15	104	-	ATCGATCCGATCTCCTTTGA	GGGATTTTGGTTTGAAATCG
chr1	3950981	3951388	c	(CT)20(AT)14(TA)20	108	-	GTGCCAAGTTTTCAGACCGT	AGAATTTACAGGGAGCCGGT
chr1	3951332	3951725	c	(TC)8gttacaattcaaaagacccctccca(TC)6c(CT)12ca(CT)7	94	-	AGCCCTTCTTCTTTGAAGGC	GGTCGTTCCGAAACTTTTGA
chr1	3951971	3952364	c	(AG)17ggaaagatgggggggtctagggtcgttcaaactgggttctcttgagaa(AG)6	94	-	CATCGTTAAGTGCAAGCCAA	GCATTAACTTGGAACCGCAT
chr1	3953996	3954361	c	(T)10aattttattatcaaaaagtacaaatgcctccgtttaaa(T)18	66	-	ACACTTCCACGTTGAGGGAC	ACATGTATTGGGCTTGGACC
chr1	3970188	3970541	c	(TG)19aggga(G)11	54	-	GTGTGTGTGTGTGAGGGAGG	GCTTTCCTTACACGCTTGCT
chr1	4032215	4032632	c	(T)10cgtctttgcacatccgtgggaacaaaggtacgcggagcggccagctttagtttttcttttttttagaaccaggtaatttcatcttctttcttaaatt(A)11	118	-	CCTCTCCAATTCCACTTCCA	GCAGCCCCTGTTTTGTTTAG
chr1	4032881	4033262	c	(T)10ctctccttactccattgatggatgtagagatctataaacccttcgaccgaggg(T)19	82	-	AGCTGACGATTTCGGAAAAA	GCCCATGAAGTCCAGAAGAA
chr1	4038495	4038882	c	(TA)7(AT)37	88	-	AATCAGGCGAGTGCAAAAAT	GCTGGGAAGCAATAACAAGG
chr1	4043996	4044409	c	(A)15ttttttggatgtatgttatgacagcaacatagaaacataaaaaaataaaaatctgttttgtgtgttgctagcagcaagatttgttt(A)13	114	-	TGTGTTGGCAGCCATATGAT	GCTGCTAGCAACACACAAAA
chr1	4053549	4053920	c	(T)10cgttggggaattcggattacaatcgctggattttttactcagtctttt(A)14	72	-	TTTCGGAGTGCTTCGTTTTT	TTGTAATCCGAATTCCCCAA
chr1	4098241	4098656	c	(A)11caacaacagataaaaagagtatattaacttcatatacttgagcatggaatagctataattcatataagggtgtggagatcgaataaaagataata(T)10	116	-	TCTCCCCCATCGTTAAACTG	TCCTTGTACCCACACTCCAA
chr1	4125735	4126085	c	(T)15aatgtgtttaaaacgtaaaaacacta(T)10	51	-	CATCATCATCAAATCCCAACA	TTTGTGTTGATGGAAGCATTG
chr1	4129540	4129904	c	(T)14gtgtgtcc(GT)15c(TG)6	65	-	CCGTGTGTGTGTGTGTGTGT	GTGAAGCACTCGGTGAAACA
chr1	4163580	4163941	c	(T)13acttttgatgtaaattcacacgcgtgtgcacacat(AC)7	62	-	ATTTCAAAACGGTGCCACTC	GGAGAGACGCCTTCGAGTTA
chr1	4208071	4208486	c	(A)15gacataagcaaaatttatttcattaattaataaaatttttacatccacacttt(TA)24	116	-	ACATGCACAAACATTGTGGG	TTGTTTTCTTTCTCTTTTGTCTTTTG
chr1	4217570	4217931	c	(CAA)5catcccttacaatggattggatagacttttatataat(A)10	62	-	AAACCTTGAATCCACAAGGC	GGGTACAAAGTGGAGCCAAA
chr1	4230909	4231305	c	(AT)6aatag(AT)40	97	-	CAAATGTGGAAAACCCAGACA	GCCATAGGCATTCACAGTCA
chr1	4232991	4233346	c	(T)10gaattcctcaaaaaactaagaaaaatgaagc(A)15	56	-	TTGTCAAAGTTTTACCTTGCTTACA	TGCTGATTTTTGCAATGATATTC
chr1	4250698	4251049	p2	(TA)26	52	-	CTTGGCAAACTTTAGGGCTG	CTTGGCAAACTTTAGGGCTG
chr1	4268853	4269245	c	(ATGA)6gatataaacaa(AT)21ag(AT)7	93	-	GATGAATGAATGAATGAATGAATGA	GGCAGTACCCCAGTATTCCA
chr1	4281136	4281519	c	(A)11ttgaataagtcagattctattataaaaaaatcggcaattaataactaagtaaagaaaatcac(T)11	84	-	ACGTCAACATGGTACGCAAT	CAATTTGATTGGAGGCATCA
chr1	4282114	4282471	c	(A)11ttctttttcttttttctctttttgacctgttgatgg(T)11	58	-	TTCGCTCTCTATCCGTTTCAA	CACCCACCCATGAGGATAAA
chr1	4294557	4295005	c	(AC)18aaaaagagatttgagcttaaagaaggtagtaaagaatatgtttagatgaaatatggggtgtatttataggaaaaatggtggtttaaagcag(A)11t(A)10	149	-	CACACACACACACACACACAAA	TCGCATATGCCATCCTCAC
chr1	4320708	4321133	c	(T)16gagtggggtggagtctagtagggcctaatataatcattttatttctacaagagatcatagctgatgctcacaaatggctttttctataaaat(A)18	126	-	TGGCTTCACTAGTGGTTTTGTG	AAGCCATTTGTGAGCATCAG
chr1	4337130	4337550	c	(T)10aataatactccatacagctttattgtatttcttcttttactcattgattccatagatgacgatctagttacaagtacagctcgaaaatcatacttta(AT)7	121	-	TATAGGGAAGCGTTCGGAGG	TGGGCTGGTTTCTAGTGAGC
chr1	4354497	4354892	c	(ATT)8taaataacatcatgacattatcatcaaatgtcaattaaatgatgtaccaaatcaccc(A)15	96	-	TGATGTACCAAATCACCCAAAA	TTTTTGTAGGCCTGTGATTAATTCT
chr1	4388639	4389043	c	(T)10aattggattcaaaacaatattgtattttagcccaaaactttttgatcgattttattcaaacccatatatac(AT)12	105	-	GGTGGCGTTCTTTTGACAAC	TCATCATAGAGACCATCCTCACA
chr1	4392816	4393210	c	(CT)11ttctatctctctaacggtgatgcaaggtgtacaacgttaccggcagttatctgacggc(GGA)5	95	-	AGGTGTACAACGTTACCGGC	CTCTTCTCTGGTGATTCCGC
chr1	4398033	4398448	c	(T)10cttgatttgtagctcttagtgccgaggatcgtgcggatcttgttaatgctctgaaggtgctttgatttgccttaatgggtcacgccaattttctg(T)11	116	-	GGTCACGCCAATTTTCTGTT	CGCTTTCTGATATTTGGGGA
chr1	4406400	4406816	c	(CT)12ttctctctcaattcttgttaaagagagcaaaccatggaagacgaggtggaaatggtgtacagtgttgttggtgatggg(TCT)5	117	-	AAGACGAGGTGGAAATGGTG	TGGAGTCGGTTTGAGGATCT
chr1	4410815	4411202	c	(T)11ccctggtgaaaaccattaaaaaaaccctgataatagtaagtttaaatgtaatataggggcattttat(A)10	88	-	CCACTTCGCCTTTTGTCATT	ATGGTTCCCAAACTTGTCCA
chr1	4449740	4450170	c	(GA)9tgggcactatcatcaaagaatgacatattgaaatttcatgggtttctgggctctttgtcctacatggctacatgttcttttgttgactt(GA)12	131	-	GGCTCTTTGTCCTACATGGC	ATGGTTGCTGGAGCTCAGTT
chr1	4479596	4479981	c	(A)19gaaccattctaaacattataacaaatatttaaaaaatgaattttgatagaatgaca(T)11	86	-	GGGTGTTCTCATACCCAGGA	ATGGGCAGGAAAGAGAAAGC
chr1	4504215	4504572	p2	(TA)29	58	-	TCGTCCAATTCAACTCCTGA	GCCCTCTTTGCATGAAGTGT
chr1	4511222	4511729	c	(CT)10taatggtcagtgtagctattcgtctttctctccctccccaaatgggttagattag(CT)7ttcaatgggtttctgtaacttgtctcattctctctctcaatgggtcagtgtagctatttgtctttctctaacttcccaaatgggttagatttg(CT)13	208	-	AATCAAACACAGGCCAAAGC	ATCTAACCCATTTGGGGAGG
chr1	4515638	4516011	c	(A)15gaagagaaagcacatacataaatattacaaacattcccataaaacaaac(A)10	74	-	TTACAACCATTCGCTCCACA	TTTTTGACTTGGTCATTTTCG
chr1	4521028	4521424	c	(T)13aaattaaaaaaattatctaaagggcttatttataataaaaagatgtttttgaagattatgaatattattaaatt(A)10	97	-	TGTCGAACAAGTTAGGCGTG	TGTGTTCATAGTCCATGCGG
chr1	4529994	4530405	c	(A)11gacttgttccttcaattggagtttactgacttttgccagctcaccttattagaaagtcaagaaaataataaaatatttgaaacaaaatt(A)12	112	-	GACTTTTGCCAGCTCACCTT	TTAATGGAGCTTCTTCGCGT
chr1	4546661	4547050	c	(A)10ctccaccaggttgtcggttctaaaaagtccgcttcgaatggatcaaacgtgatgacgtggca(TC)9	90	-	TTGAGGTTGAAGATGAGGGC	CGACAACCTGGTGGAGTTTT
chr1	4555746	4556112	c	(AT)19aataaaataac(CT)9	67	-	AATGGGCTGATTTTTGGTGA	CGTTCAATGGCCAACTTTTT
chr1	4557391	4557787	c	(A)17ctctatttaaaaaattaaccataacactaagacattatcgtctaaccccacattaaattagattc(T)15	97	-	TTTTTGTGTATGACGGGGGT	TGGTATGTGTGGTTTGTGGG
chr1	4588268	4588673	c	(A)13gcaaataaaaaaatatttttgaacttggtccaaggtgtagaaaatgaacattaaacaatgaaaaataa(T)25	106	-	TTAAGTGTCATTGGCCCACA	TTGTCAGCTCACATCTTGGC
chr1	4597757	4598155	c	(A)10tgaacaattcaaattgggttgggtgtaggtatcagccaatctgatttgcctgaatcaaacttaacgtgattataa(T)14	99	-	CACTTTCCCCTTCAAAATTCC	CCGAGGCCAAATCAAAGTTA
chr1	4655370	4655749	c	(TC)18(AC)22	80	-	CCTTGATGATGTGGATGTCG	GGGGTTGTGTGTGTGTGTGT
chr1	4664884	4665251	c	(TA)11ttagacattttgtttatgttttca(AT)11	68	-	GGGCTGATTTTTGGTGAAGA	GCTCGGGTGACACTCTTAGG
chr1	4665241	4665603	c	(A)12tagaggtaaaaaacgcattttaaacaagaaaaaaaatgaa(T)11	63	-	AGATGGGCAGATTTTAGGGG	CATCTGTCAAAGCTTCATTTCG
chr1	4681864	4682234	c	(A)11tttggttcattactctttcaccccaagcaggtagagtataacttccc(A)13	71	-	TTCACCCCAAGCAGGTAGAG	CTGCCCAGGGTGAAAGAATA
chr1	4694319	4694680	c	(AT)8aagacaatacttattgccaaaagattc(A)19	62	-	GGGAATTAGTAAGGCTTCCACC	GCATCAATCGCTATTAACATCTG
chr1	4695006	4695382	c	(AT)17aagacaatacttattgccaaaagatt(A)17	77	-	TGGGAATTAGTATGGCTTCCA	TCGTTTTCACATCCATTTAACG
chr1	4702787	4703140	c	(A)12tatgctatgtttgtggggctgttttgtttt(TA)6	54	-	CGAAGAATCGACTTGGGAAA	AACAGCCCCACAAACATAGC
chr1	4706369	4706835	c	(GT)7(G)16ttcttgtgtatggatgggtattttgaaggagtggaattgtagagtttttgaaggagagtctgaattagcacatcgtctcctttctgtctatt(GA)11gggga(G)18	167	-	ATGTGCGTGTGTGTGTGTGT	GACAGAAAGGAGACGATGGC
chr1	4711539	4711896	p2	(TC)29	58	-	GGCGTCTGAAAATCAAGAGG	TGGTGGTTGTTACCTCTCCAG
chr1	4800554	4800913	c	(TC)20(TA)10	60	-	CTGCTTGCAGGTGGTCACTA	TTCCAAACATTTTTGCCCAT
chr1	4814199	4814634	c	(A)10tcaaaatttcaccatttagtcatgaagaaaatgcaaccttgacttacgattggg(T)18gggga(G)22tttctaaaatacccacc(T)10	136	-	GCAACCTTGACTTACGATTGG	CCTTGCTGGTTTTCTCAAGC
chr1	4815763	4816119	c	(A)12ttcaaaaatgatttctattaaaaaatgaact(A)14	57	-	TCGTTCGGAATTGAGACCAT	ACCCAAACAGCCACTTATCG
chr1	4854482	4854836	c*	(GA)6(AGA)6*cgacgaagaaagagag(A)12	55	-	TTTTCTGACGTAATTGCCCC	TCAGTCTCCCCTTGAACACC
chr1	4855202	4855605	c	(T)16catctcctattctatttatttttattgagaagaggtatggaacctcggtttagccaaccgatcaatgtagtaaaac(A)12	104	-	GGAACCTCGGTTTAGCCAAC	TCAAATCCCATCAACAACGA
chr1	4856885	4857316	c	(CT)9caaagtaaaactaaaatcctatttttttcgattgtgcgagttccataaccaccattttctctggccgatgagcatccaattctt(TC)6(AC)9	132	-	GGCCACCCTCTTCTTAGGTC	AAGAATTGGATGCTCATCGG
chr1	4857526	4857908	c	(ATA)5atttgtgacagacaagttgaggcctaatgcgaaaccccaaaatgaggtgt(TA)9	83	-	CTGAGGTCACTCCAGCATGA	ACGGTTTCTACGGTTTGTCG
chr1	4864180	4864533	c	(TA)9gaga(AG)16	54	-	CCAAAACCTCTGACCCATGT	CTCACCAAAAATCAGCCCAT
chr1	4866987	4867389	c	(A)14ttattgctgaggccaccaatttttttaattattgtcgacctcaccgattttttttcattactgaggtcgacaattaaaa(T)10	103	-	GGGTTTTACAACGTCGAGGA	TTGGTGGCCTCAGCAATAAT
chr1	4911268	4911639	c	(TC)19(T)17ggt(G)14	72	-	TGGGGTGCCAATAAAAATTC	TCACGCTCTTCAAACATTGC
chr1	4959287	4959673	c	(G)14ataagactgcatgtgccccgagaattagtcgggtcttctaagaggcccggataccttggttcc(A)10	87	-	CATGTGCCCCGAGAATTAGT	AAACTAAGGATCCCCATGCC
chr1	4973242	4973594	c	(A)11ctatctcattatttgttagatttgatc(T)15	53	-	AAGTAAAAGTTGGGGTGCAAA	TGTTTATCACACCCCAATTAAAGA
chr1	4992777	4993238	c	(A)21ttgtgcttgatcccaggtggtgaaaatggatggttactgaactcccaaatttaaaattaacggtgagaaataaccttttttaaa(GT)8tgcgttactctgaaaaaaagtatgtgctt(TG)6	162	-	AAATTGTGCTTGATCCCAGG	TAACACCCACCCACACACAC
chr1	5022456	5022876	c	(A)22tttgtgggcctttgtcgatcgaatttagcagttttcacatattgcttgtatctttacttttataaaatatagtgcttgattagt(A)15	121	-	AATGGACCGAAACCATCAAA	TATCTTAATTGGGATCGGCG
chr1	5071129	5071551	c	(A)12gtgagaagaaaagagaaaaaaatccagttaactcttggctcgcatgaggataaatcgtgaataactaaaaatgc(A)21gttaaa(T)10	123	-	ACCACCAAGAATTGAGGCAA	CACGATTTATCCTCATGCGA
chr1	5074791	5075156	c	(A)13gcttagctgtacctcacccatagccaaaagaaaaaaatctat(A)11	66	-	CCTCACCCATAGCCAAAAGA	GCAAGACACTGCTCGATTCA
chr1	5120855	5121231	c	(T)11aactttgtctcctccaacccacgcatacagccgcgacatatataatgaaaaattca(T)10	77	-	CACCTCAGATCTCGTGCAAA	TGAAATGGAAAGAGGTTGGG
chr1	5138699	5139059	c	(TTA)7tttatttatttgtgtgtatgtgtctgt(G)13	61	-	TGTGTATGTGTCTGTGGGGG	CATTTCGTAAAGTATCGGGACA
chr1	5181111	5181477	c	(T)10atgaaattcacgatcaccatgcttaagttgattttttttatttatta(T)10	67	-	AACCATCATGTAGCTTGGGG	TCGACTCATTCCAATCGTCA
chr1	5197407	5197974	c	(CT)15tttatttaggtgggtttagtgtatattggaagctattgttactggaattcaataaataaaaataagaagaaaagttttggttgcattcatctctctca(CT)10tttatttaggtgggtttagtgtatattggaagctattgttactggaattcaataaataaaaataagaagaaaagttttggttgcattcatctctctca(CT)11	268	-	TGGTTGCATTCATCTCTCTCA	CCTTCAGGATTTCCAGGTTG
chr1	5222128	5222527	c	(T)45aatttattatcaaacctgattacaggggattgcagttttattggg(T)10	100	-	CCCATCGATTCCCATTCTAA	CCAATAAAACTGCAATCCCC
chr1	5234709	5235164	c	(TC)22tgtatcaagctcatttcatctcctcaacatctagggtttcaatgttaatggaagaaaccttcccttctaatagg(TC)19	156	-	TCGTTTTCGTTTTGGATTGA	GACGGAAAGGAAAAGAGCCT
chr1	5246376	5246793	c	(GGT)6catgatgatgatcgatgatatatggtggggaatatcggctaggtttacggcggactttccttcctgtttgcgaagaaaac(GA)10	118	-	TTTGCGCTGGTGTCTACAAG	GCTCGTATCCAATCTCCCAA
chr1	5266827	5267198	c	(TGT)5tgctgatggcgtggttgtagttgttgatgttggagataa(TGT)6	72	-	GGCGTGGTTGTAGTTGTTGA	TCTGGAGGAAGCTGGATGAT
chr1	5312368	5312788	c	(AAT)5ttttataatctgaattaattgatcctatattaccatagctcactttattatattaatgtaaacattgaaaattgttgacatatac(A)21	121	-	CGATTCAAACCCATCCAAAC	AAACTGAGTTGCCTCATCGG
chr1	5322194	5322588	c	(ACC)5acactcaacctcattgttgtcaccatcaccgtcatcgccaccatctctggtcacattttctctttg(TC)7	95	-	AGAAATTCATTTCCCACCCC	GAGGGGAGGATGTGATGGTA
chr1	5325995	5326376	c	(A)10tgatccgatacttcagggttgcaaatgatgaaattctatgaactttgtaaagataaaatttc(A)10	82	-	TCAGGGTTGCAAATGATGAA	TGAGCTTGATCTGAGGTTTTGA
chr1	5362319	5362716	c	(CA)25ctcacacg(CA)13(CT)7	98	-	GTTGACATGGAAACCCAACC	GGGGGAAATTCATCGTTTTT
chr1	5401827	5402224	c	(A)11ttgaatccttaattcatttcggaattcgtagctttgaaatttgactgatatgaattttgttgttgttgtggt(TGA)5	98	-	TGGATTCATTTTGTTGGGAAA	GCAACTTTGAGGTTGTGGGT
chr1	5404480	5404829	c	(AT)7agatat(AG)9(TG)6	50	-	TACAGAGTTCGGCCTGATCC	TCCCGAGGCAAATGATCTAC
chr1	5417667	5418166	c	(A)10gttcagtgtcaatggaatccttttgacactatacaaaaatatattataatctcatgtcaaaagaattatgttgacatttgagaa(T)11cagttcttttcactgggatccttttgacactgtacaaaaataaattttgaactcatgtaaaaggtaattttttattatc(A)16	200	-	TCCATGTCAATGGGATCCTT	TCCCAGTGAAAAGAACTGAAAAA
chr1	5448674	5449061	c	(T)14gcttaattatttcaattatgtgaaagcaatggagcacatttttgaaagcctatccatatt(AG)7	88	-	GGAGCACATTTTTGAAAGCC	CCAAAACTGTGTGATGACCG
chr1	5468509	5468926	c	(A)14caacagaaacaaggtttgcatatctcaaaacatagattctacttgtaaggttttaggtgtatatgtgaattataggaacttcaacctctgataa(T)10	118	-	ATGGCCTACCCAAGCTTTTT	ATTGGATAACAGGAGCACCG
chr1	5472451	5472800	p2	(AT)25	50	-	TGGTGGTCCCTACCGTACAT	ATTTATTTTAGGCCGGGTGG
chr1	5479023	5479382	p2	(AT)30	60	-	TGGTGGTCCCTACCGTACAT	ATTTATTTTAGGCCGGGTGG
chr1	5575887	5576268	p2	(AT)41	82	-	TGACGCACTATCCCTTCAGA	CCACAGTTGCATGGTAGGAA
chr1	5622497	5622899	c	(A)17ttctaagaaaaaaattgaccaaaacagagcctatttgcaagaacaacaaaaatccatatttgcatagtttatttt(A)11	103	-	TGCAAGAACAACAAAAATCCA	TGAGAAGGTGCCTTAGTCGG
chr1	5631675	5632085	c	(T)36aatccggtcggactgaaattaccctttaacgttacaaaagaaaggggtc(TA)13	111	-	ATCCGGTCGGACTGAAATTA	GAAGTTTTGGAATGGGCTGA
chr1	5633035	5633386	c	(AT)7(AG)19	52	-	TCAGTCCACTCCGAATCTTTTT	CCACAATCACACTCACCGTC
chr1	5653814	5654205	c	(GTG)8aaggggagagagactatgataacaacttgttaggatacaaacaacacaacagg(TTA)5	92	-	TTGTAGTGGTGGTGGTGGTG	ATCCGCTCCTCTCACAAAGA
chr1	5705503	5705925	c	(AT)34g(TA)18tg(TA)8	123	-	TCATCTGCACCTTCATGCTC	TTCCAAACATTTTTGCCCAT
chr1	5737514	5737942	c	(A)11ttgattttaaaatccttatctgaatttttcaatataacttcaatgagtccc(A)15ctttttgacagcatctcatgaaattataaaaataa(T)17	129	-	TTGGAGACAAAGGTCCAAGG	TTTCATGAGATGCTGTCAAAAAG
chr1	5747697	5748090	c	(CT)8cattcttggttgctcttcccttataagttttaacagtctg(TC)19	94	-	AGCGAAGGACACGAAGAAAA	GGGAAGAGCAACCAAGAATG
chr1	5747973	5748334	c	(GT)10(GA)21	62	-	TGTGTGTGTGTGTGTGTGTGA	TTTGGAGGAAGTTAGCACGC
chr1	5757523	5757927	c	(T)11ctatgattacttggtagcttttgatttgctaccataatttatgcatttagggtatttcgaaaaagatttaccaagtattg(A)14	105	-	TTTTCCAACGACAATTGTGATAA	GGTAGCAAATCAAAAGCTACCAA
chr1	5761468	5761861	c	(TA)13tcatgttttgaaaaatgttttgccaaaaagtttgccattgaacgctaccc(AT)9	94	-	TCCTCATCAAAAATCAGCCC	ATGCTGGGGAGCAATAACAG
chr1	5793721	5794092	c	(T)12catttttttttcgcactgtttggacgagtggggaagatgagagaaa(T)14	72	-	TGAAACGAAGAAAGGTTGGG	TCTCATCTTCCCCACTCGTC
chr1	5795198	5795561	p2	(AT)32	64	-	GCGTTGTGTGCCGTTAGTAG	TGGAATTCTCTCCTCATCACG
chr1	5799371	5799799	c	(AT)8ttggggttcgtaggcaacctgagaagttacttcaggcccgctcacgcaa(AT)32	129	-	GGTTCGTAGGCAACCTGAGA	CTCCAAACATTTTTGCCCAT
chr1	5806651	5807160	c	(AG)7acctgtaagagttgatgagtgctgatgcagatgtcgaactccttcaagatctgtgcgagatttgtgt(GA)10gctttgcgaaggagacggatttgtgcgagatctatgcgagttggaaatccaacaactgtgcatagctgtgttagacgtttgaagaccaagatgaaac(AG)6	210	-	GAGGTTCGAGAAGGCTGTTG	GATGTTTTTGCCCCTGCTTA
chr1	5807411	5807782	p2	(TA)36	72	-	GATTGGATTGGTTCGGATTG	TTTTTGGATTGGTTCGGTTC
chr1	5812378	5812753	p2	(TA)38	76	-	TCATTGATCGTGCGTAATCAG	GGCATGGCTTTAAAAGAGGA
chr1	5813467	5813830	c	(GA)6cagagcaagttatgtttttaaaagtgtgtttc(T)20	64	-	TTTGTTCCTTTCAAGCCCAC	GCAAGAGCTCACAACCCAAT
chr1	5814907	5815269	c	(A)10cgtgtttaaaacgtaaacaacgagtttaaaaacgtaagaacgg(T)10	63	-	GGCAATCACAAGGCTTTAGAA	CGGGTGAACATAGGTTTTGC
chr1	5817032	5817383	c	(TG)9(AG)17	52	-	GGGATTTGTCCTTTTGTCCA	ATCAACCCAACCCGAACATA
chr1	5818776	5819145	c	(A)11ggatcaaatgatttttcttgaaatcacttgattttcttctattcta(T)13	70	-	GTCGGATTGGGGTTCAACTA	GGTCCAAATATCGGTCTGGTT
chr1	5821539	5821971	c	(T)16cattaatttgttgatcctatctgtcttggaaataataggataaattcgagaaaattaggaatgaaggaatacaatatcatcaatc(TA)16	133	-	CCCACCGAAATACAGAATCC	CTGGACCATTGAATTGGTGA
chr1	5822333	5822737	c	(AG)11aatccctttgggaggattagagagagaagaaataatgcagcacaaagacattaaaaatag(A)23	105	-	AGAGAATCCCTTTGGGAGGA	CAGAATCAAAAACCATGGCA
chr1	5822921	5823324	c	(GTG)7acagatgtggcattgttattaccaatatgagtagacatgtgagcttggtggggtctaatcatggctgt(TGA)5	104	-	ACAGACCCAAACCAAAACCA	TTAGACCCCACCAAGCTCAC
chr1	5824950	5825373	c	(T)16ggcttcaaacccaaagcataaactttaaagcaagaggaaacaaactgcaccaaactctttagcaacaaatctactcttcagagtttcaacatcaacca(T)10	124	-	GGTTTGGTGAGGGATGACAA	TGCAGTTTGTTTCCTCTTGC
chr1	5839013	5839378	p2	(TA)33	66	-	GCCAAACTACAAGGGGTCAA	TCATCCAAGATGAGATGGCTC
chr1	5842989	5843388	c	(AT)24ctcaatcgttggattttgcatttaaaggattaggatcatgtg(T)10	100	-	TTTGGAGTCTACGGGTCAGG	AAAAATCAGCCCATTCCAAG
chr1	5843897	5844370	c	(AT)38(AG)19gaatgctaacgtcaaagacttcatggggacattaacattatccaccac(T)12	174	-	AGGATGATCCCCTCATCACA	GACTCACATTGCGACACACC
chr1	5849450	5849827	c	(AT)13(AG)26	78	-	TGGAGTCAATGGATCCCAAC	GCATTCCCCCTCTCTCTCTC
chr1	5892796	5893227	c	(A)10gatttcaatgttttttgttattttgcaagctaacaatacttgttgtgtttgttgtatttattttttaggtaggtttcttttatttatttactcacttg(A)10t(A)13	132	-	TGGTGGCGACTCTAAACCAT	AACCGAGTTGACATGAGGGT
chr1	5893619	5894051	c	(A)11ggtttcaatgttttttgttattttgaaagctaacaatacttgttgtgtttattgtatttattttttaggtaggtttcttttatttatttactcatttg(A)10tg(A)12	133	-	TGGTGGCGACTCTAAACCAT	AACCGAGTTGACATGAGGGT
chr1	5896972	5897461	c	(A)10ggtttcaatgttttttttattttgcaagctaacaatacttgttgtgtttgttgtatttattttttaggtaggtttcttttatttatttactaacttg(A)11tccgatttttactttatttatccgattatgtccttttaagtatgcatatcatcaaacaaatg(A)10	190	-	CCAAAAACCAGAGGCAATGT	AGTTCGACTGTCCATTTGGC
chr1	5906712	5907126	c	(GA)8ttggggaggaattgaaagagcaattaaaaagactgagagagattgagagagcgattaaaaagaataagagagatt(GA)12	115	-	AATCGAGGGAGCAACTGAGA	AATGGCCTTAAGCCGTTTCT
chr1	5941229	5941673	c	(A)11tcatagattttcctctgaaaaatccatcatcttcactcttcaaatctataggggtattttatttatttatttttttttataaaag(A)10ttcctccgttttcaacttctgtt(A)16	145	-	AATGGGCTGGATCATGAAAG	CCATTTCGAAACCATGTGTG
chr1	5942417	5942781	c	(AT)7aataataaggtatattggaaggtgcttagtcacaaaatcac(T)10	65	-	TCCTCACAAAAATTCAGCCC	TATATGGGTCGGGTTCCGTA
chr1	5949976	5950347	p2	(AT)36	72	-	TGACGCACTATCCCTTTAGACA	ATCCGGGTGATCATAATTGC
chr1	5960490	5960912	c*	(AGA)5(AG)10*aaggtggtcagaaacggagccgacggtgacgacgatggagatgacgacggcggcggcgacgaagaggttagtgtaa(TGG)5	123	-	GACAAGGAAGAGGAAAGGGG	ACTACCACCACCACCACCAT
chr1	5989076	5989561	c	(TTC)7atctctcttgaaaatttatctttatttttatttatttatttcgattttaatctgtctgtta(TTG)7aacatgttatgatcttctgattctggattggattaatgggtttggtttgattcacagatccaaatggtaag(TC)6	186	-	GGGTTTGGTTTGATTCACAGA	CTCGCCCAAGACTCAGAGAT
chr1	6003842	6004264	c	(T)13aa(T)10gttgttgaacatgttgtgatcatgggattttggattcgataaatgggttttgtttgattcacagatccaaatggtaag(TTTC)5	123	-	CCCTCCCTTCATCTTCTTCA	TCCAAAATCCCATGATCACA
chr1	6011212	6011629	c	(T)15ataatacccttccaaatttattgtctttcatctaccacccccttaaccccaaagaggatggccatgtcctgggcaccggcaaactctag(TA)7	118	-	TTTCGTGAATGCCTTTTCAA	TACTAGAGTTTGCCGGTGCC
chr1	6016228	6016640	c	(T)14ctcccatttttttgaggggctacgtttgtttgaaaaattctacttatccttaatataaggcccgtgagcttcattgggtggataa(T)14	113	-	ATTCCACCTGATTGGATTGG	TTTCAAACAAACGTAGCCCC
chr1	6019516	6019948	c	(A)11ttttaacgtggtgtgccattaacagaaaataggttttgctgtttttatctccttctccatgtttaaaaaacgaaaaaacagcaaacagcaaagaggcgtt(TC)11	133	-	AACGTGGTGTGCCATTAACA	CCATGACGATGAAGATGACG
chr1	6049976	6050365	c	(TATT)5attttcaaaatcgaaatccattaatattaaactgaatctaccatacacctttttt(TTA)5	90	-	ACTCTCCCTCACGTGACACC	GTGGGTGGGCCAGTAATTTT
chr1	6052772	6053173	c	(T)16gaaaacatccctctaatattgcaacgtgtaccatattttaaagggttaaattttttgttactattattttta(T)14	102	-	ATTTCCAACGTACAAGGCGT	CCCCCACCCCAAATTTTTA
chr1	6070277	6070629	c	(T)14cccactcgtagtttcttatggca(T)16	53	-	GGAAGAGGATCCCACCAAAT	TCTGTCGACCATCTTCCCTT
chr1	6079337	6079732	c	(GA)9gtaatggttttgttgttgccagt(AG)9acgcagagagaaagtatattaatgg(T)12	96	-	TGGAAAAATGGGAAGCTTTG	CGTCAGAGATGGTAAGGCAA
chr1	6083917	6084284	c	(T)10atcatcgtcttccccaacccatcc(A)11tcagccaatga(T)12	68	-	ATCGCCGATCGAAACAATAG	GAACGTTTCTCCTTTTTGCG
chr1	6098008	6098393	c	(A)18tttaacgtcacattttcttcctatttgttgattatgagttatat(TA)12	86	-	TGGGTTGAGGGTTCGAATAA	CAACGTCACCAGTGTACGACTAT
chr1	6099090	6099443	p2	(AT)27	54	-	GATGATACGTCTCGATCTCGG	TTGACTCGGCTGAATTGATG
chr1	6102186	6102594	c	(AT)6(GT)7ggaaaattgcttagcatccaaatttaaaattaaaatccaactatgaaaatatgtctgttttgttcaa(T)16	109	-	TATTTAGGACCTCGGAACGC	TGCCATCCCATTTAGATGAA
chr1	6136848	6137223	c	(GT)14gc(GT)15(AG)8	76	-	GCGTGTGTGTGTGTGTGTGT	GTCTCGTTCCGTTTCATGGT
chr1	6168323	6168758	c	(T)10gaaaatttttttattctttcttgctgtcaatggacaacactatttttag(A)10ttattttactt(A)10ggtaactacatactcttttttcctttaaaaatt(A)13	136	-	CCAAAACTCCAGCACCTTGT	CAATTGATCATTGGACAGCG
chr1	6219385	6219738	p2	(AT)27	54	SSR-2	AGTGTCGTGCAACACCAAAA	AACCCATGGAAAATGGATGA
chr1	6246135	6246552	c	(CT)8atctt(TC)8tttctcttttctacggctatgacttgtgacctgcaactgcgacctacgacaggttcatctctctt(TC)8	118	-	CACCAGCTGATCTCTCCCTC	CAAGTCGTAGCCCCTGAGAG
chr1	6252298	6252695	c	(A)10tctaaaatttagcttgcccataaagtttggtagcttgttaataaaatttgggaaaattatttaaccctaatacgaac(T)11	98	-	GTTGTCGAAGAAGACGCACA	AAGAAAATGGGGTAGTTTCGG
chr1	6273515	6273929	c	(T)11ctatttgttgaaattgtattattaaacgctttggtttaaaatatgtttttttccatgcttatctgatgatattttggtgaaaatcatatttaa(T)11	115	-	TGACATTCCATTCCGAGTTG	ACACCCCAAACGTGTGACTT
chr1	6320848	6321270	c	(T)13caatgtttttttcttctttcttctctcttaaaatctcaagaacacttgaacttatagaaagaaaccaaaagaaaaaaagtaaaataaaataaaaatg(A)13	123	-	TCTGCTGTCAAGGGTGAAAA	GACATCCATCATTGGGAACC
chr1	6327263	6327632	c	(CT)9t(TA)6(TG)8tatgtgtcacaca(T)10	70	-	TCCATGAGTTTGTATTTTGAGCA	TTCATCAAAGACAATGGGCA
chr1	6327607	6327989	c	(A)10gtgttagacaatgctaacttcctcataaagtcttggacgttagcattcccc(AT)11	83	-	TCTTGGACGTTAGCATTCCC	AAATCAGCCCATTCCAAACA
chr1	6351337	6351733	c*	(TTTA)5(TA)9*tcgtttgaaatccgattcaaatctagaattgaagaaagatttgctcg(TA)7	97	-	CGAGACCTTGCACCATTTTT	TCTCGAGGTAGATCCGTTGAA
chr1	6354416	6354815	c	(TA)17ttttcgtttgaaatccgattcaaatctagaattgaagaaagatttgctcg(TA)8	100	-	CGAAACCTTGCACCATTTTT	CAACCCAAACGAGTCAACCT
chr1	6371529	6371919	c	(TA)14tttttcgtttgaaatccgattcaaatctagaattgaagaaagatttgctcg(TA)6	91	-	CGAAACCTTGCACCATTTTT	CAACCCAAACGAGTCAACCT
chr1	6389641	6390039	c	(AG)12gacgttctctcttttgcagtcttcttttcttcttattgaagaagaagatgacaaaaataaaaaca(T)10	99	-	CGCTGGTTTGGTAGAGAAGG	GAGGGGCTGATGTGTGTTTT
chr1	6397604	6397982	c	(A)15gagataaaggagacattttttgcacattctagttgttatgtgtattaaactatt(A)10	79	-	TGGATTGCACGAACAAGTCT	ACCACCTTCCATGAGAGCAA
chr1	6400545	6400955	c	(TA)6tttgtttttgataatgccacttagggccctccatcgacatggatactagaagatttcttggatatgaaaaaattgagtgcaagaaa(T)13	111	-	CCCTCCATCGACATGGATAC	TGGTAAAACACGTTGAAGCG
chr1	6425862	6426271	c	(T)18gggga(G)14aggattgatggtgttgtgattccccgcttttggaaagtttccttggtcattagtcctcaaaag(A)10	110	-	GCCATGGGAAAGCTAGTTGA	TCCCAAGACACATCCTAGCC
chr1	6427699	6428118	c	(AT)10ac(AT)49	120	-	GTCACTTGACGATGTCCCCT	AATTGGCAAGGATTGTGGAG
chr1	6453955	6454386	c	(A)15tttctcccacaaatttatcaaaaaaattaggtaaacacaaattataaaaaattaaaaac(A)11tatgggatcacataaaaattagattaatttc(A)16	132	-	TTAGAACCGAACCGACCAAG	CGAACCGAACCAAACTGAAT
chr1	6454385	6454803	c	(GA)17acaactcctcctccttcgac(GA)8gcaacccgcagcagctcctccgacggc(AG)11	119	-	GAGAGAAAGGGCAGCAACAG	GAACCAAACCGAAAATCGAA
chr1	6518166	6518796	c	(AG)6aaaggtgtggatgtgtgagtgttgtgtattggcagtaataaaacaaaaaaggttgtgctggcagcaacataggcaacaaaagataaacaaattc(T)19gctgtgagtgttgtgttggcagcactaaaaccaatttttttttactatgagtgttgcgtgttggcagcaataaaacga(T)11gtgtgagatgatgtcattttcattattcatggcgtgagtgttgttctgccagcaatatg(TA)17(T)11(G)13	331	-	GCAGCAACATAGGCAACAAA	TTGCTGGCAGAACAACACTC
chr1	6542409	6542783	c	(T)10aatcttttttaaaacttaaaaaaaaactaattaattttaaagaaaagaaattc(T)12	75	-	ACCCGAAATAAATCGAGGCT	TGGATGTTTTGGCAGCAATA
chr1	6543163	6543778	c	(T)14aattttttaatttttttaaagtttttttttaacgttgtta(T)12acttttttttaacattt(A)10tttaatgttttttattttttaacgtttttg(T)14aatgttttttttaa(T)10gaaaacgtattttttttagaaaa(AT)6ttttttagaa(AT)9ttttagaa(AT)8ttatattagaaaa(AT)10ttttttattattaatttttttat(A)12	316	-	CACCCCATATCTCATCAATCG	GGTCCTAATCAAAGGGTTGGA
chr1	6549198	6549588	c	(AAT)7aaaatacaaaaaatcaaaaatcaagaaaatacaaaaaatacaaaaaggtcaaaaagatt(A)11	91	-	CCAACACCCCAACATTACCT	TGGTGAGAAGGTTCAATGAGG
chr1	6626262	6626661	c	(GA)9ctgagatccagagctcaatcgagaaagggactgagatcaagagaggaactgagagaacaattgagagagc(GA)6	100	-	CGATCGAGAGAGGGATTGAG	AAAGTCTCTCTCTCAGCCGC
chr1	6657189	6657544	c	(T)12aagaaaaaaacaatgcttaaagatagcatccaac(A)10	56	-	CATCGCTCATCCTCAAACAA	TATGAATATTCCGCCCTTGC
chr1	6706606	6706958	c	(T)14ggcttcagtttttgtgtag(T)20	53	-	TTTTTGCCACAAAAGGTTGG	GATTGAGTCAGGCCCCTCTT
chr1	6718543	6718894	c	(A)14(T)14aatttaattaa(T)13	52	-	TGATCAATCAAAAAGTGGCG	CCAAAAACCAGAGGCAATGT
chr1	6719004	6719403	c	(A)11tttcatttgtttggtgatacgcatgcttaaaatgacataatcggagaaataaagtgaaaatcggattttttgttttttg(T)10	100	-	ACATTGCCTCTGGTTTTTGG	GATCGGGTTGACGAGTTGAT
chr1	6721347	6721763	c	(T)13aaaggagaaattttttgtttttatcatttagttgttttttatatttaggtgttcttttagtaggcaagacatgttgcctattgacagcaaaat(A)11	117	-	GGCAAGACATGTTGCCTATTG	TCGGGTTGTACTAGGGACAC
chr1	6796117	6796481	c	(T)10gatggccctggactatcaaatattttcttgtagaatgggctt(A)13	65	-	TTGAGAAATTTGACGGACCC	TTGGTGAATTAGAGGACCGC
chr1	6802988	6803378	c	(A)10caaaaacaaaaggaatgttaggatatttttaattgattttcaatcagggaaaatttatctgttttctg(T)13	91	-	AAAATCCAAGAATGTGCGTTG	GGGCAAGATTGTTCAAAAGG
chr1	6805411	6805833	c	(GA)9taaacaatgagagagaaaggcagagagtgagaggtcgatctatcgactgtgaaagagaaacagtaagagagaggagaaagaaagagaaacagt(GA)6	123	-	AGGCAGAGAGTGAGAGGTCG	TAAACCTGAAACTCCGTGGC
chr1	6862537	6862938	c	(A)10tcaacaatgaaaaattcaacgccatggttcgtcgaattttatgaaattcgatggttttcggctgtcaaatatggg(T)17	102	-	GAGTCGTCGAATTTTTCCCA	AACATCCCCAAACCACACAT
chr1	6864104	6864511	c	(AG)6aaggtggtcggagacggagccgacgcgacggcgatggtgacgacggcgatgacgacgacggcaaggttagtgtaa(TGG)7	108	-	GACGACGGCAAGGTTAGTGT	TTTTCCACCCCATTCAAAAA
chr1	6885020	6885397	c	(AT)11tgtcctaccctattgatatgtaaaaataaataagaaaagaaagag(A)11	78	-	CAATGAATTAGTTCGGAGGCA	GGGAACATGTTTAGACATCTCTTTT
chr1	6886134	6886593	c	(T)10gctttttggctgcctctcccaaaatcgtcctcccttttgttctccttcccctcttttataatggtttctctatgaaacgtgggtgtgg(GT)15(GA)16	160	-	GTGGGCTGTAGTTGCAGGTT	CTCCATAACCTCCCTCCTCC
chr1	6916502	6916983	c	(T)12aattccttctcatgacgcacagtagaatttttttactaatagcagcataaaaaaaaatcc(T)10cttttttctttgttgcctttatcacgtgtagat(A)10taaaagattgtttttagttgcacaccatgcacagtaacattaaaata(T)10	182	-	TTCCTTCTCATGACGCACAG	CACGCGTGATGATCCTAAAA
chr1	6934298	6934705	c	(A)10taataata(AT)16(TA)29	108	-	ACCAATCACCTTGCTTGCTT	TCGTGATTGTAATCGCAAACTT
chr1	6957152	6957501	p2	(TC)25	50	-	CTACATCCACGTGCAAACGA	GCATCGCAAGAGGACTTAGG
chr1	6961198	6961587	c	(A)11tatgaatggctgaatttgaatccattgactttgaaaaactataaatgtaaataattgggaaaatgttg(T)11	90	-	TAGAGCGCCCTTTCTTCTTG	GGATTCAAATTCAGCCATTCA
chr1	6988049	6988450	c	(T)10aataaaatataatagatatagcgacggatattaatatccgccgctatagatcatttaaaa(AT)16	102	-	ATATATAACACATATAACGGCGGAT	AAATGATCTATAGCGGCGGA
chr1	6990177	6990568	c	(GTG)5cctgtaattaatcattcaccaaaaatgatcgatcgattccaaaaaattgagagacagagagacaa(AG)6	92	-	GTCGAATCTCACGAAGAGCC	CGATCGATCATTTTTGGTGA
chr1	7006353	7006718	c	(T)18aattttgaaatttagctacgggctattagaacttttg(A)11	66	-	GGCCTTTAGCTACGGTCTCC	ATTCAGCTTCATGTGAGGGG
chr1	7048270	7048652	c	(A)10ttctctaatcctattaatatgcaaggacaaacaaaaatatagaaaaagacataaagaagaag(A)11	83	-	GCAACCGCACCAAGTAAAAA	GGAGATGCATCATTTCTGTGTT
chr1	7116766	7117125	p2	(AT)30	60	-	GAGTTTGGTTGTCCCTACCG	TTTAGGCCGGATGACCATAG
chr1	7134369	7134827	c	(AG)21atgaaccgatgtgcagccacaggtcgcaagtcgtaaatggtagcaacaggtcgcacgtgttaggtctagctgc(AG)22	159	-	ATACGTATCAGGTCCAGCCG	TTTACGACTTGCGGCCTACT
chr1	7134633	7135200	c	(AG)28atgaaccgatgtgcagccgcaggtcgcaagtcgtaaatggcaacagtaggccgcagccggaggtcgcagcagtaggccgcacgtatcaggtccagctgc(AG)22aaatgagtcggtggcagccgcatagacgaaagagagacgagagaggagggttagg(T)14	268	-	AGGTCCAGCTGCAGAGAGAG	TTTGGTTCGGTCTTCGATTC
chr1	7165368	7165793	c	(T)13cttttgatcttttgttgtttcgcttgttgtgttgtttgggggctacctcagcctccatcacttcttttcttcatttataaaagtttatacttatc(A)18	126	-	GGCTTCTGTTCTTGTGGTCC	GTGATGGAGGCTGAGGTAGC
chr1	7187921	7188347	c	(T)13acgcgtggtgtgccattagcagaaaacagtttttactgtttttttatctccttctccacaaagaagatgacggaaatcagctacagagaggacgtc(CT)9	127	-	TGGTGTGCCATTAGCAGAAA	GTCGCCATGATCGAGTTTTT
chr1	7193302	7193673	c	(A)18ttcaaaagaaaaagaaatattatccaaaatgggaaagaaaattc(A)10	72	-	TTCTGGGGTACGTAGGCAAC	GAGGCTCAAAAACCCAAATG
chr1	7201502	7201933	c	(AATA)5aaataataatgactaaaaatattattttaaaactaatttttaaaaaaaattataagaagagacgtagccgtttgattcgaaataaaaaaggatt(TAA)6	132	-	GACGTAGCCGTTTGATTCG	GCGGATACGTCTACCTTTGTT
chr1	7212668	7213070	c	(AT)14gtgtgtgtgtggtaaagcttagggtgctgaacgggaccc(AT)18	103	-	TCAGCCCATTCCAAAACTTC	TCAGCACCCTAAGCTTTACCA
chr1	7219316	7219669	c	(T)12attttttttgattttttgtgtggggaaataga(T)10	54	-	CCTTGTGTGGCATTTCCTTT	GGGGTACGTAGGCAACTTGA
chr1	7241387	7241738	p2	(AT)26	52	-	ATGGGGACGATTTATGCACT	GAGCCTTTAGCGACAACCAC
chr1	7258308	7258722	c	(T)19gtataatctagtcctcagaatcatcatatggatccaaagaataagatgggcttatgcatctcattcatgtccttc(T)21	115	-	AAGATGGGCTTATGCATCTCA	CGGTTATAAGCCGTTTCCAA
chr1	7292729	7293230	c	(A)10ccaaatttattgataattataatgaggatactaattccaccactaaatggccggtcaaattctctctatttccttttctctctcctctcaa(T)10aaaacaaaaattcgctccggtcaaattctctctcctctataaaattcactctccttagttttttctctttttttccattt(A)11	202	-	TAAATGGCCGGTCAAATTCT	ACCGTCCATGTAATGGCCTA
chr1	7300616	7300988	c	(T)12caaatgaaaaa(AT)25	73	-	TTATTTTTGGCTGGTTGGCT	TACGCGTCCCATATCACGTA
chr1	7319293	7319658	c	(A)12ttctactacaagtcattgtttagtgaaatcaatgtcctatatt(A)11	66	-	CCATTGGACTTAGAACCCGA	ACGTTCCAAACCACCTACCA
chr1	7332734	7333093	p2	(AT)30	60	-	GGATTGGAAGGTGTTAGGCA	GAGGCGGGAACAAATCATTA
chr1	7341156	7341519	c	(T)11gatttttgtgtttgctttcatgtgtttaagttagtattt(A)14	64	-	GCAATAAAGATGGCGCAGAT	TCAGGCAAAAATCATCACAAA
chr1	7393070	7393550	c	(A)13cattccatcaaacgtttcttcaattccagatttgaaccaaatcttgaatcaag(A)10cttgaataatgaacgaccgagagttgccgaaagccgtggagatgctgagagagctcatagaaatgcttcacggttcgtcgaaaagca(AG)9	181	-	TCAGCCCCAAAATCTGAATC	CTCTTGCTTTTCGACGAACC
chr1	7432668	7433031	c	(CT)11cacagtcgatcgatcgacctcactctctgc(CT)6	64	-	ATCGATCGACCTCTCCATTG	AGAGAGAGCGGCAGAGAGTG
chr1	7446290	7446653	c	(T)15aaaatccattctccaataatttgatagtccagggccgtc(A)10	64	-	TAGAGGGCCGTGCTATTGTT	ACCAAACCTTCTGTTGTGCC
chr1	7455204	7455573	c	(AG)6gacgtgagagacaacttttagtcggagagaaggagagtgt(AG)9	70	-	CCTGAGGGAGAGCCATTAGA	GGGCTCTTCTTCACATCTGG
chr1	7457435	7457848	c	(ACC)8attacactaacctcgctgtcgtcgtcatcgccgtcatcaccatcaccgtcgccgtcagctccgttgccgaccacct(TC)7	114	-	ACTAACCTCGCTGTCGTCGT	GTGGTAGCGGAGAAGGTGAG
chr1	7490345	7490700	c	(C)12ttaatttatatggaaacttaaattgttaa(T)15	56	-	GAAAGAATAGGGCCGTGACA	TATGCTGCACCATTCCACAT
chr1	7552984	7553392	c	(AT)7aaaatcaaccaatttccaaatcaaatcatccattataaaaacactgaacaaataaattcacaaatcacataaatctgaaattaac(A)10	109	-	ATGCATGACAATGGTTGGTG	TTCTTTATGCGTTCTTGCCA
chr1	7553709	7554069	c	(A)12tgaaacctaagtaaatcatcaaatcatgtaaaagt(CA)7	61	-	TCCAAAAATTGCAATCCACA	ACAATTGGATTTGGGGGTTT
chr1	7557746	7558119	c	(T)17ggtctagaagcaattatagaagttgtggaatgtttgctgagaa(T)14	74	-	GGAAGAGTGCTTGTTAGGCAA	ACACCACCCATACACCCATC
chr1	7573207	7573575	c	(A)12tagttcattactctttcactccaggtaggtagagtagaatttc(A)14	69	-	CACCCTGGGCAGGTAGAGTA	CAAATCTGAGCAAAAGTTGAGAGA
chr1	7628471	7628872	c	(A)12ttaaaccacaaaaatctgaattttattttgaaaatattcaagaaactcctcgtgtttactccccccaaaaaacagattt(A)11	102	-	CACTTGTGAGCAATGTGGGA	CCACAGAGATGAGAGGGGAA
chr1	7654682	7655055	p2	(AT)37	74	-	AAGGAACGAGAATTTTACGTCAG	ATGGAGCAAGGACAGTCTCG
chr1	7698157	7698650	c	(T)11attaatagaattagggaaatattatctatgtaatttttactttcatctttgcatattggtgagattagagtttttatttttattatta(T)11atgtcgataagattaggtaaatggttgtttatgcgatttttattttttcttacattgaataggatttgatag(T)12	194	-	CTCAAAAGCATTCCGGTGAT	GCGAGGAGAAAACGAGAACA
chr1	7739017	7739393	c	(T)15gatggcccttaactgtcaaattattggatgatgagttt(A)24	77	-	GCATATTTGACGGTCTCGGT	AGGCATATTTGACGGGTTGA
chr1	7748566	7748936	c	(T)12aatttgtttttttttaaaagaaaaaatataataaataaagattaaaagg(T)10	71	-	TAGCGGATGAGGTCGAATTT	GAAACAAGTTGAGCCCAATCA
chr1	7755361	7755846	c	(AG)7ggggggtgttttgaacccaccttgaagttccaaattcactcttgtttcttca(CTT)5ctatgcttcttagatccttagtgagttgagagtgaaactttcctttttttagagtgtgttatgagagagtagtgaggaggagtagagaaagtaga(T)10	186	-	TGAACCCACCTTGAAGTTCC	ATACCCCTCCTCTCTTCCCA
chr1	7757520	7757909	c	(T)15gattttttgttttttaa(T)10attttggatttttgatttttttatttgattttttttta(T)10	90	-	AAGTCGAAACCGAGTGCAAC	TCAAATCACTCCAAATGCCA
chr1	7827507	7827922	c	(T)11acatccatatttcaagtaccgatgagtgtattttaggcccatctgtgcttgaaatacgaaccagtacgaatttttc(T)29	116	-	ACATTGCCTCTGGTTTTTGG	CCCTTGGTAAGAGGGGAAAA
chr1	7828824	7829207	c	(AG)7ggggggtgtactttaaacccaccttgaagcttcaaggtcactcttctttctttct(TTC)5	84	-	AAGCCTCGGGGACTACTCAT	TGGGTTTAAAGTACACCCCC
chr1	7852918	7853280	c	(AT)19a(AT)12	63	-	TGAGAGAAAGCCATGCATCA	TTTAAAACCGCAAAACAGCC
chr1	7853268	7853667	c	(CT)8acagctcgaaagctctctctctc(CT)9cctcgctcctcatctca(TC)13	100	-	CTCTCTCTCCTCGCTCCTCA	CCAATCGATTTTCGTGAGTG
chr1	7862880	7863274	c	(T)13acctctccaaatcggagagaaatgaaaagaaatgctcacgactaataaaagtactaaaaattataactaccc(T)10	95	-	GGGTCGGTTTTTCCTCTTTT	ATGGGTTCAATGGGTTTTGA
chr1	7880813	7881193	c	(AT)32a(AT)8	81	-	TGGCACCAAACTTGGCTAAT	ATCCATCATTGGGAATCGTC
chr1	7909422	7909935	c	(CT)6gtttcatcttggacttcaattgtctaacacagccgcgcacagctgttagatctccaactcgcacaaatctcgcatagatcttcgcaaag(CT)7cacacagatcttcgcaaagctctctctcttgcacagatcttgaaagagttcgacctctgcatcagcactcatcaacacttacagg(TC)7	214	-	GACCTCTGCATCAGCACTCA	TGGTGGTCAAATCTTGGTGA
chr1	7989057	7989410	c	(TA)15(AT)12	54	-	TGAGAGAAAGCCATGCATCA	TTTAAAACCGCAAAACAGCC
chr1	7989397	7989796	c	(CT)8acagctcgaaagctcctctctctcct(TC)8ctcgctcctcatctca(TC)13	100	-	CTCTCTCTCCTCGCTCCTCA	CCAATCGATTTTCGTGAGTG
chr1	7998626	7999044	c	(GGCGAC)5ttggctctccacaaggagctcgttcaaaccagatctt(GA)7ggagagtggtctttcgagctgt(AG)8	119	-	AGAGAGATTGATTGGCGACG	GCTCCCTCCACTTTTTGGTT
chr1	8006636	8007004	c	(AT)6a(AT)6a(AT)9a(AT)12	69	-	GAAATCATTGGAGAAATCCATCA	TCCATTCTGAACATTTTTGCC
chr1	8026437	8026831	c	(T)28ctgagaaagcttggattcaggtgaccaaagttcaataacccattagtagctgaacaa(T)10	95	-	GCAGTAACCAAAACAAGCCC	TTCGATTGATGCCCTTTTTC
chr1	8044656	8045007	c	(GA)7ttggaggaggggaagaagaag(A)17	52	-	ATTGTGCCAAAAGAGGAGGA	ATCGTTGATGGCACCTCACT
chr1	8087694	8088078	c	(TA)13agggatattagaagatgcataggcataaaatcatgttttattaaaaa(AT)6	85	-	TCAAGGCTGAGACGTTGTGT	ATGGTTTCAAATCTGGTCCG
chr1	8093130	8093499	c	(T)12acaacatatatcatcctcgtcaaactcaaagcttaggaagataacata(T)10	70	-	CATCCTCGTCAAACTCAAAGC	ATTTGTGGGCAAGTCCACTC
chr1	8104173	8104557	c	(T)19(G)12tttaaactaatattttttaatgaattttggagtttttgtgcc(T)12	85	-	TTCACCTAACCTTGCACCTTG	AAAAGGCACAAAAACTCCAAAA
chr1	8118262	8118613	c	(A)11tgttttccagaagaaaatgttttccaaag(A)12	52	-	TTCCAGAAGAAAATGTTTTCCAA	TTGGTAGTTTTCCAAGGTCCA
chr1	8131824	8132236	c	(T)12gctctttctgggttcttgggtatgttattattgaacttattatcttcttgagggggtaatatttttgtttgatttggacccttttgtttcc(T)10	113	-	TGCTCTTTCTGGGTTCTTGG	CACCAATCATGCCATCTGTC
chr1	8160706	8161067	c	(T)10ctctaaccacttcgtatggttatgtcatatgtgcc(T)17	62	-	GGCTGGGCTTCTTTTGTATG	GCAGTGTTGCAGGAAGTCAG
chr1	8192029	8192382	p2	(TA)27	54	-	TCAATTTGGTTCTCGGTTCA	AGCGCAGAAACGAGAGAGAG
chr1	8192213	8192656	c	(CT)6cgtctctacgatccgcctttagcggctgccagtgcgatcagctcctctttctctttgcgacctattgccagcgggtgctagtgtcatcggctcca(CT)12t(TC)6	144	-	CGTTTCTGCGCTCTCTCTCT	GCCGCAAGTTGTAGCCTTAG
chr1	8195472	8195855	p2	(TA)42	84	SSR-3	GACGCACTCTCCTTTCAAGC	TATTTTAGGCCGGATGGACA
chr1	8211137	8211561	c	(T)19gcatcataacatgtataattatgtttgagaacatgttatattggaaacatataataaattaaaacaaatatcttatgtat(TA)13	125	-	TTTGACAAAAGATATGCTGATGA	AGGGGAAAACTTCGGAAAAA
chr1	8254673	8255061	c	(T)13atagtctaattgcattctcctatgccttctactctttaaatcatctaccatgtttcattg(T)16	89	-	CACATCCTCAACCTCACCCT	AGAAGGCATAGGAGAATGCAA
chr1	8279228	8279648	c	(T)15cagttagaaattatactggatgatgtattaaacaagaaaatcatatttaagttttcaaagctaaaaaactcttcattgttagggatgacgtttaaa(T)10	121	-	AGAGCCTATCCCTGTTCTTCA	ATCCATGACCTTCGAAATGC
chr1	8290476	8290990	c	(AAT)6ataaatacttaactagtagactaaatcttagttttgattctaaccatccaacatcacagagggtgacctgtttaaatcatag(A)10tcacaaaaattctttacatcatgaaactacttaatattaaaaattacacaaaaagtattaaaagtaattttgaaatgc(A)27	215	-	TTTGTAAAAGCTGCCTGCCT	TCACCCTCTGTGATGTTGGA
chr1	8291864	8292256	c	(T)21gcggtcccaaattgcttgaatttctcaaaaaaaacaataatagtaaga(AT)12	93	-	CCCGCACTGCTAATTGAGTT	AATTCAAGCAATTTGGGACC
chr1	8329469	8329850	c	(TA)10gtttatcatatgggtaagttttacgagtttgtagtaatgaaaaaaaaac(A)13	82	-	TGAAGTCTTGGATGGCAACA	CGGGATTTGACAATGATTTG
chr1	8389211	8389577	c	(T)12ggaagttctactctacctactcggagtgaaagagtaatgaactaa(T)10	67	-	GCCCAGGGTGAAAGAGTAATG	CCCTGGGCAGGTAGAATAGA
chr1	8425906	8426451	c	(A)10ttcgaagtaaaattctttttaactttattgattgtgttgaaagtggataactaccgaactacaaaatttaaaactaaaattcaacattgaaaattaa(T)12cgattgtttttttgaaagttcttagaattttgtcctttattacctagtgatcagttacc(CT)19(AT)15	246	-	TGTGCTACGCACGACAATTA	AAATTCAGCCCCTCCCTCTA
chr1	8426582	8426939	p2	(AT)29	58	-	TATTCCGCTCCGTTCTGTTT	ACGTCTCTCGTCCGTCTGTT
chr1	8427842	8428256	c	(TA)7ttcatcttcttttgagttttgtgataagttgaattaatggaaattagattttaagatttctttttcaagttatcttatttctttaaa(T)14	115	-	ATTTGACGTCCCATGCAATC	ATATAGGGGGCAGTTCGTGG
chr1	8428126	8428532	c	(T)10atgaatactgattagtttaatttatgtattaatatcacattttagatgttctc(AT)22	107	-	CTGGCCGATAATCACCACTT	TTGTTGCTGAACATTTCCCA
chr1	8442354	8442783	c	(A)10tccctttcgtccccatctaacagagaaaaatgaattgcg(CT)7tcgatcaggtttgattctcggattcgtctgtattcatctctccttaaag(CT)9	130	-	CTGTCGTTCATTGCGACAGT	TGTTAGATGGGGACGAAAGG
chr1	8453691	8454105	c	(T)13gatagccaaaattttattagaggaggacaagaagtccttaaaagagaataaagcaaagaaaggagaacacaaacaagagcaagagaaggaat(A)10	115	-	TGCCTTGTCAAAAATTGGAA	GAGTGGGGTGGTGTTTGTTT
chr1	8468689	8469101	c	(T)10gtttcttttatctgcgtggaaaggaggcagcagagagacattttcgtttctgttcacctgtgtggaagagaggtagcaaagagagatac(CT)7	113	-	AGAGGTGAACGAAAACCGTG	AGGAATCGCTCCAAACACAC
chr1	8469151	8469612	c	(T)10attcagcaagtttaaaaaaaaagaagaaaaaactgatttta(T)10ccaatttgaaccaacgatttcaaactcgcggtttcgaatttccatttggaacgttgaactcgacagattttggtgtttgttttaaaaaac(A)11	162	-	TGGAACGTTGAACTCGACAG	TCATGGAATTTTGTTTGCCA
chr1	8499328	8499695	c	(T)10gttttttttgaaactcattctccaataatttgatagtttaggaccatc(A)10	68	-	GACGGGATGGTCTGTCAAAT	TAGGTGGCGACTCTCAAACC
chr1	8518939	8519293	c	(A)13tttatgcatggtgtgccgttagtagaaaatga(T)10	55	-	TGTTGTTCGTGATGAGGAGAG	ATGGCACACCATGCATAAAA
chr1	8519216	8519582	c	(T)10aatgtttttcatgatgaagagaggattctaagaaaaaaatcgt(A)14	67	-	TCATGATGAGGAGAGAATTCCA	TGGCATACCATGCATAAAAA
chr1	8522739	8523244	c	(T)10aaatatatatataacctatttccgccaacctgcatacattgaaagcaaatatacaataaatttattgtttttgagatccaccaagagttcag(A)10taaaac(T)15gggattgaccattcataaagataaatgtatctaataccaaagg(CA)15	206	-	GCCAACCTGCATACATTGAA	CATGGGTGGATGAGGTTTCT
chr1	8531671	8532062	c	(AG)6actcaccagtaaaagtgcgcggcatcgatgaagtcgcacggagatgctccaatgtttagggcttttaa(AG)6	92	-	TGCTCCAATGTTTAGGGCTT	CCTCACATTCTCTCTTCCGC
chr1	8531950	8532335	c	(A)10cacgctctacagttgcggaaatttcaatccgctgcaatacatagtttaattc(T)24	86	-	GCGGAAGAGAGAATGTGAGG	TAAACGCTGCACTGTTTTGC
chr1	8532411	8532896	c	(A)15cacactctgcagttgcggaaacttcaatccgttgcaatacatagtttaattc(T)11aaaggaacagtggtctacaactgcggaaaatctaatccgctgctacattagatttaaaaaaattgataaaaaaaaattcaataaattaaatt(TA)8	186	-	TCCGTTGCAACAAACATTTC	AGTTTCCGCAACTGCAGAGT
chr1	8553092	8553490	c	(T)18ataaccaaaatttgattagaggaggacaagaagtcctcaaaagaaaataaaacaaagaaaggag(A)17	99	-	TGAACCAATAACTTTTGCGG	GCAGTTTCATGAGTTTGGGG
chr1	8557468	8557849	c	(TC)12actgaaatcctcgaacctcctctctctccgctgaaaccatctatcatg(A)10	82	-	TGCTGAAACCCTCGAACTCT	TGCTTGTCCAGTTGATGCTC
chr1	8569957	8570363	c	(T)10cgatttggaccaactatttcaaacccactgtttcgaatttttattgcgaacgatgaacttgacagattttggtgttttatttc(T)14	107	-	GCCCCTGATGAACGATAAGA	TGTGGCCATAACCACTCTCA
chr1	8607546	8607983	c	(AT)43tta(T)11atttttaagaaactctttttacc(ATT)5	138	-	TTGTCACGCCAATTTCTTTG	TCAATCGTGGTAGGGGATTC
chr1	8616599	8617020	c	(A)10tttatttttaattttaatttttaatttttaattttttttacttatttaatttttttagggtacatgcgttgatctttgatagtaaa(T)11aaatt(A)10	122	-	AAGGTCGATTTGGGAGACTTC	CAAAGATCAACGCATGTACCC
chr1	8630648	8631082	c	(TC)6agtcgtctctcttgatcgtatctctcaatctcagtcgctctctcaatcg(TC)10gatcgtctctttctcgatctcagttgttctccctcaatctca(TC)6	135	-	TCGTTGGAACGAAAGTCTCA	AGATCGTTCGAGCAAGCAAT
chr1	8635378	8635777	c	(A)11cacgtctctgttaggggaaattggagaagaaggcaaaaatgtgttgtggttgttgcttattaaaattttttttatgaag(A)10	100	-	GGGAAATTGGAGAAGAAGGC	CACTCCACAACAACACCCTG
chr1	8635957	8636313	c	(TG)6ccgtaatagaagtgggtgacaaggtttaatggc(A)12	57	-	GTGGAGGATGTATCGCAGGT	CATCTTCTTCCCCATTTTGG
chr1	8672113	8672538	c	(T)10attattttgtttattgtgattggtgaattagagaaccgtgctattatttgttaaatctccaaattcgacagccatactctatgga(T)13g(T)17	126	-	TCTCCAAATTCGACAGCCAT	TTCTTAGTGAACACGCCCAA
chr1	8676602	8677022	c	(TC)20aatcgctccttcgattgacctctcagtcactctctcaatctctccctcgatcgacctctcgatctca(TC)7	121	-	CTCCCTCGATCAATCTCTCG	ACAGTGGCGCTCTGAGATTT
chr1	8686836	8687253	c	(ATT)5tttttattgttcttttgaaagtttttagaattttgtcccttataaccttgacc(CT)14(AT)11	118	-	TTGTCCCTTATAACCTTGACCC	TTTTTCATCTTCCTTCGTGATT
chr1	8698457	8698821	c	(TA)12ataaaaatgcaatgaattcg(T)21	65	-	TGGAAACAGTGGTGGAAAAA	TTTTTATGCATTGAATTTGCC
chr1	8724346	8724714	c	(AG)7acgaattgcaatcgaaatacgttctgtcttggactcttggttaag(A)10	69	-	GGGAACGATCAAACAACAGAA	CCATGCGTATTCCTTGGTCT
chr1	8760032	8760385	c	(A)10gatttttttctttattaattagtttattt(TTA)5	54	-	GGGCCCAATAGTGAGTCAAA	TGCCGCCCTTATATCATACC
chr1	8798316	8798676	c	(T)10gagtgctgtgggcgacagcaaggtaatggtgtcaagggag(T)11	61	-	AAAATTTGAATGCTGTGGGC	ATCCGCTTTGGTTGAGAATG
chr1	8803051	8803405	c	(A)10tctagttccccacacaataaaaaattaagaaaaag(A)10	55	-	TTCTGGGGTACGTAGGCAAC	CCCCTTGTGTGGCATTATTT
chr1	8834641	8834995	c	(CT)6tttttataataataataattattattttcttaa(T)10	55	-	TTCATCGATTTTTGGGGTGT	CCGGTCCACCAACTTGATA
chr1	8856139	8856505	c	(T)13atataggtcatcaagctacccaccatgatg(ATA)8	67	-	CATCAAGCTACCCACCATGA	TGAGATGAGGTCCAGAGACCA
chr1	8858463	8858917	c	(T)11gcaatgaaagtattattctccggattattgaacattttgaataatttacggattttaagtttgaaaagaataaaata(T)11aatttataaattttatgatttttacgaatttttataaaacttggtg(A)10	155	-	ATGAGCTTCAAAATGAACCAAAG	AAATGGGTTCGCTTACAAGG
chr1	8864821	8865192	c	(A)10tatatttttatttcaaataaaaatctaaggccccttgtttcgcccatgggct(A)10	72	-	TGGCCCAAAAATTGTGTTTT	GAGTGGAGGATTGGGTTTGA
chr1	8879397	8879793	c	(T)10gtaaaaaaatcttagactttcgccctccataagtacatgacattgaatcactcttaaatatcgcgttacgaa(T)15	97	-	CCAATGTTTTGAAAATGGGC	CATGTACTTATGGAGGGCGAA
chr1	8886208	8886568	c	(A)10ttaaaataaataaaaaatgaaaaaaatttgaaaaatac(A)13	61	-	GCAAATGAAGGTGAAGTTTGG	TTGGCCATGGGTAAGGTATG
chr1	8912237	8912692	c	(T)11ctctttcaatggctgtttttttaatggctgtcgttaaaaatcccccctccttttgttctccttcccctcttttataatggtttctctatgaaacgtgg(GT)6gagac(AG)15	156	-	TGGCTGTCGTTAAAAATCCC	TCCATCTCCTCTCACCCATC
chr1	8927030	8927454	c	(A)15ggaactcaaattctctttggacacacccactcggactctctttatctattctttcttttctagattgaaagca(AAG)9(A)10	125	-	ACACACCCACTCGGACTCTC	TGGTCGATGGGCATTAAACT
chr1	8936264	8936782	c	(T)12cttgagcagaagtttggatttcggtttgaaccatgtgagacagggagatatgaaggt(GA)10aagagagatg(GA)8cgtttctctctctctttgctgattttcgttttttctgttggggaaggagataaaaacaacagaaacaaaattctgctaatggcacaccacacgg(A)10	219	-	TTTCGGTTTGAACCATGTGA	GTGTGGTGTGCCATTAGCAG
chr1	8962422	8962798	c	(A)10ttttctttttttggcccaagccaaaaaccagaggcaatgtgcctcaaaatgtgtat(A)11	77	-	CCAAAAACCAGAGGCAATGT	TAATCGGAGATCGGACGAGA
chr1	8992699	8993109	c	(AT)8ttcccataaacaaaaactctaaaataaataaatt(AATA)5aaagataatgtcaaaatggggaagaaaattc(A)10	111	-	TATGGTTTCTAAGGCTGCCG	CCCTTGTGTGGCATTTCTTT
chr1	9006226	9006641	c	(TC)6(CT)9tcttggcttctctgttcaagaaatttggattttcaatgggttttataggaagcgat(TC)15	116	-	TAACCTTCCCACCGAAACAG	CGAGGACATTCCGTACAACA
chr1	9040826	9041189	c	(T)13gggtagtaaatcaacatttcatccaataatctttaaaaatt(A)10	64	-	TCTGTCCTTATTGTGGGCTTTT	AAGTCAGCTCACAAGTTGTCCA
chr1	9067433	9067806	c	(T)10aaaactcatcttccccaacgcgtccatacagccgagacatataaaaacaaaa(T)12	74	-	TGGAGTCCGGATGATCAAGT	ACGTAGCTGCGGACATTTCT
chr1	9114450	9114864	c	(AT)9taaagtccttattcgcttcaacaattgttaaatttaggtttaaacaaagtttaagttaaggtacccatcccacccccaacatcacg(A)11	115	-	GCCACCAACCCTTACGAATA	TGCAAAGCTCCACTAAACCC
chr1	9126451	9126818	c	(T)12ataccgtttgtattgtctcagttttttcatttatcttcttatttgg(A)10	68	-	TGGTGCTCATGGTAGCAAAA	TGACTTTTTGGATGGCAGAGT
chr1	9172647	9173121	c	(TTTTC)5ctttttatgggttactcaacttgaacccacaacctcaaagttgattagcaaaccaaattggaatctaagcccttgaacccttctttacc(T)13gaaaaattacttaaaggaccctagtggggagattt(A)13	175	-	AAAGGACCCTAGTGGGGAGA	TTAGGGCATTCAACCCTGAG
chr1	9223072	9223470	c	(TTCA)5atctaaaagaatttacaaaattctctatttatagagttttactaccactaaagaagagtc(A)19	99	-	ACCAAAATGGAGGTAGGGCT	CCGCAATTGGGTTTTCTTTA
chr1	9325045	9325438	c	(A)10cttctgaaatctataattctaaaatttcaacaagtacattaaaaaaaacatgaataacaaaaaataattaac(A)12	94	-	AATCAGGGTTTAACAAATCACACA	ACTCTGCAATTCGATCCTTCA
chr1	9344515	9344914	c	(T)10atttagttggatttattttatttattttttctctttatttattttttttatcttgattgtagatgattttgggtattgca(T)10	100	-	CCAAACCTCAAGGGTCAAAA	CTTGGCAATGCTCCCATACT
chr1	9364963	9365329	c	(T)14aaaacttgcgttggctattggacgggttggaaaagacgagttt(A)10	67	-	CGGGGTGAAAAAGATGAGAA	CCAATAGCCAACGCAAGTTT
chr1	9404583	9405003	c	(A)11ttcctacacattcgcacccaccacaaaatgttttcgaggttaaaacattgaaccccttccttatgacaatgggtctttgaccaataagctcacatttttc(A)10	121	-	ACACCCTCACCTACACTCGG	TGGTCAAAGACCCATTGTCA
chr1	9423126	9423528	c	(TTTA)5ttatttttggttttgttttagttaaagacgtgtccattgtcagcaagaagaaagacaaaag(A)11c(A)10	103	-	ACGTGTCCATTGTCAGCAAG	TGATTATGCACACCAGCCAT
chr1	9431784	9432201	c	(A)10ttagtcattactctttcacctcgagcaggtagagtaaaactttccaaaaagtttagttcattactctttcactccgagtaggtagagtagaacttcc(A)11	118	-	CACCCCGAGCAGGTAGAGTA	CTGCCCAGGGTGAAAGAGTA
chr1	9436671	9437089	c	(TC)7agatctctgttgtctttcgccagatctctctctcgtcggatccaacacagaggaagaatattgagttcagtaggtatcaagctgg(GT)10	119	-	CCGCGTATAACGCTCTCTTC	GGAGAAAAACCCCATTCCAT
chr1	9438086	9438439	c	(TC)6tgtatttatttctgtagtttaatggaatggg(T)11	54	-	ACCCAAAATTTCATGGGGAT	TGTATTGGGATCGTTCGGAT
chr1	9466867	9467327	c	(AT)8aatgaaagggggaaaaacttttgatttatttttattttaattaggcatgcgttgatctatccgtggacgttttttaa(AT)34	161	-	AGGCATGCGTTGATCTATCC	TTCTTGCTTGTTGTCAACGG
chr1	9490812	9491205	c	(A)12ggtgttgctctttctaacaggaggttacttcatgaatttttcctttaaaaaaaataaaatacaccatcca(T)12	94	-	GTTTGCTGCCAAGAACCAAT	TTGGTGTGAGCAACGTGTTT
chr1	9505831	9506334	c	(A)10tttaattattttttttatttccttcttacggtcaatggacagtacactaaa(T)11aaaacaaaaataaataagtgaatacatactggccaaggacagatcaaataaacttg(A)16tctgtcgaaggaaatactgtccccacctaaaaaacctcatttttttcc(T)12	204	-	TCAACTCTACCAGCCCCTTG	TGGGGACAGTATTTCCTTCG
chr1	9527226	9527589	c	(T)10gttttaaatgaaaagc(TA)19	64	-	ATTTTTAGGTCGAGGGGGTC	GCTTGGTGGTCCCTATCGTA
chr1	9553373	9553772	c	(A)10tttcatttgtttgatgatatgcatgcttaaaaggacataatcggataaataaagtaaaaaatcgga(T)10ca(T)12	100	-	CGGCCAAAAATGAAGAAAAA	CCAAAAACCAGAGGCAATGT
chr1	9564224	9564575	p2	(AT)26	52	SSR-4	CTTAGGACACGCACTTCGGT	CGAAACGAGATCCCAATGAT
chr1	9568156	9568539	c	(AT)20(TA)22	84	-	ATCATGCACGGACAAAACAA	TTTTCCAACGTATTTGGGGA
chr1	9592663	9593041	c	(AAG)7aaaagaagatcaagtgtacaaggtgggtttgaagcacacctccc(CT)7	79	-	ACAAGGTGGGTTTGAAGCAC	GAACTTTAGCCTTGGGGTCC
chr1	9615985	9616361	c	(AAG)7aaaagaagatcaagtgtacaaggtgggtttgaagcacacccccc(CT)6	77	-	ACAAGGTGGGTTTGAAGCAC	CCCAATCATCAAAAAGGGGT
chr1	9650997	9651352	c	(T)10ctttttttaggcacgcgttgatctacagttcgatg(T)11	56	-	TGATGCAAAATCCCAAAAGA	TAGATCAACGCGTGCCTAAA
chr1	9655760	9656148	c	(A)12catggaggaaaaaaaaatgaaaatgagttgaacaaaaaaac(A)11c(A)11c(A)12	89	-	TGGTAGACATCAATGTGAGGGA	TCATCTTTCTCTCAAACAGCGA
chr1	9656558	9656980	c	(T)11cacataaggcagccaccaaaaaccagaagcctctccccttttgttctatccttcccctcttttgtggtggattctctatgaaacgtgtgtgcgtgtgt(GA)7	123	-	TGTTGCAGGTTTAATGGCAA	CCACAAAAGAGGGGAAGGAT
chr1	9656801	9657215	c	(T)17gaattttctttttaagagaatgggagaggggtcccacgctacccgtactacagtaatttactgttgctgaattcgtattggttgaata(T)10	115	-	TCGAAGGAGTTGGAGAAGGA	TAGTACGGGTAGCGTGGGAC
chr1	9664225	9664637	c	(A)13tcaaactatcaaaaatcaaaaataaaaaataaaaataataatat(TAA)7ataaaaaaaaatatcattaaaatac(A)10	113	-	CCCGATTGAATCTTTCTCACA	CAAAACGGAGTTGAGTGCAA
chr1	9678107	9678513	c	(A)10gaggtgacaaaag(A)10tcaaagcaaagtgtcaagttactcctggctcgtatgaggataaactgtgaacagctaaaaacac(A)10	107	-	TCTGAGCTCGACCCAAATCT	GGGCTTGGGGTTTGTCTATT
chr1	9680994	9681409	c	(A)11tcaaaaaaaaatcaaaaaaaatcaaaaatc(A)15(TAA)6ataaataaataaaagaaatcgttaaaatac(A)12	116	-	CAAAATCCTTTCGAGTTGCAC	CGGAGCTCGTATGAGACCTT
chr1	9692741	9693136	c	(CT)7gtcagccactccctcgatggaa(CT)9gtccctctctcgatcgaactcgatttca(TC)7	96	-	CTCTCTGTCAGCCACTCCCT	ATCGAGAGATCGATCGAGGA
chr1	9693303	9693728	c	(TC)8attgtttcttcgattgagatttttaggtttttcttgtttaatttgagttttggtgtacttttagagctaaattgatgactgttttttaattctatttaa(T)11	126	-	CGGAGTTCAAATCTGTCGTG	ATCTTACGCATCTCTTCGGG
chr1	9707161	9707559	c	(AT)27a(AT)22	99	-	ATTTATTTTAGGCCGGGGTG	ATCCCTTCAGGCATTCACAG
chr1	9714046	9714475	c	(TA)25tttttaaagaaatttagcatgctgtccattgacagcaagaaggaaataaaaaaaaagttaaaaat(A)15	130	-	TCCATTGACAGCAAGAAGGA	CCAAACACGCCAACAAATTA
chr1	9732247	9732599	c	(T)13aattttttttaaaacaatttgtgtcgg(T)13	53	-	AACCCGATCTCGAATTACCC	GAATTGAGAGTTTCCGGTCG
chr1	9810035	9810446	c	(AT)9tgccacactaatttatacattcgaaaacaataccaatacttcgatgatgcgatctacgtaaaatcggtatgacagaagtgactc(A)10	112	-	AGGGGCGACGATTCTCTTAT	TCGCATCATCGAAGTATTGG
chr1	9849815	9850190	c	(T)10ctttgctgaaaaatatattgaaaccttagaataaatgtctaatgaattctagacaa(T)10	76	-	TGGAAAATTATGCGTGGAAA	GGTTTAAAACGGCAATGGAA
chr1	9862371	9862872	c*	(A)10ttgcaaaaaattattatttttttccgtgtggtgtgccattagcagaattctgtttctgctatttttatcaccttctccaacagaaaaaacgaaaatcagc(AG)6acgtctctctctcatctctctctctgtct(C)11(CT)11*cccc(TCT)5	202	-	TGGATGATTTTTGGCATGTT	CTGCTAATGGCACACCACAC
chr1	9876259	9876615	c	(T)10aattttttaattttttaattttttaattttttaattt(A)10	57	-	AAGCATCAACCAATCACAAAAA	AAACTTAGGGCGTACCGCTT
chr1	9904870	9905239	p2	(AT)35	70	-	CGAATTTTGAGGTGGCTGAT	TTCTCGTATTTTTCGTCCCG
chr1	9954104	9954472	c	(T)16gacaaacaataaagaattgtttacataaaaacgagagg(A)15	69	-	AAACATCTGAAACAGTGCCAAA	GAGCTGCAATTGCTGAATCTT
chr1	9958188	9958589	c	(T)14aagttcagtgagtagaagggatgcaatcacaagggtatcactaacatcgatcaaaaagtgtgagggaacaattatcgc(T)10	102	-	GTCTGGGAAGATTGGGTCAA	CCTTGTGATTGCATCCCTTC
chr1	9960657	9961045	c	(AT)8ggtatatttttttttattagacagtgtttgtaggtttctttaaataatg(AT)12	89	-	TTGATGATGGAATGATGGGA	TTAAAGAAACCTACAAACACTGTCTAA
chr1	9961537	9962082	c	(TA)7aataaaaaaaattcaataaaagcaggg(T)11gttttgtttggtaaaacaaaaatcaatttgtttttaataaaaaaaatctttttattttgttcatgtaaaaaa(G)17aattgtgcctatttcaatgttagttctgattgattattttttgtgttatgctaattgattatccatctgatatgc(AT)15	246	-	TCAGCCCATTCCAAAACTTC	TGAAATAGGCACAATTCCCC
chr1	10002407	10002820	c	(T)11agaaaagaaaatttttataaaagagaagaaactaaagaaacctaatatcaactattactacacaaattactaaacaaattgattt(A)18	114	-	TTGAATTGAGGATGGAATGG	GGTGTGGCAACAAAATTTCA
chr1	10012655	10013030	p2	(AT)38	76	-	TCCGATTCGATAATATCCGC	GAAGTTTTGGAATGGGCTGA
chr1	10027159	10027554	c	(T)12cttttggtttctttctataatttcaagtgttcttgagattttaagagagaagaaagaagaaaaaaaacattg(A)12	96	-	GCCGGGGAAAAGTAAAGGTA	TTTCGTTCTACCCCAAATCG
chr1	10047342	10047715	c	(A)10taccaatttaaaatggccaaaaatccaacctataaaccgacttttttattaaag(A)10	74	-	AATGGCCAAAAATCCAACCT	TGAGGATTTTCGCAATCAAA
chr1	10048986	10049423	c	(A)10ctc(T)11gaaactttttttttctttcttgctgtcaatggacagtactacctttagaaaaaataagtttattttacttaaaaaacaagttaaatacatactctttttc(T)14	138	-	GCTGTTAGTGGGTGGGAAAA	TGTCCATTGACAGCAAGAAAG
chr1	10073061	10073413	c	(T)10gaatttcttccccattttgacaa(TATT)5	53	-	CAAATACCCATTGTGTGGCA	CGATCACCCAACCTAAGGAA
chr1	10102361	10102785	c	(T)13aaatttccttcttgctgtcaatggacagcactactttcctaacc(A)11ttattttatttaaaaaaactaattacacactctctttttttaattc(T)11	125	-	CCACACACCATTCCACACTC	TCCATTGACAGCAAGAAGGA
chr1	10107073	10107483	c	(T)10caagtttgatcctcaaaatatccccaatggagaagccactgaagatgccctcaatccgtgggttgcggattcacttttc(T)10ga(G)10	111	-	GAGAAGCCACTGAAGATGCC	CCGTAACGTGATTCCCAGAC
chr1	10112264	10112685	c	(TA)7tgtatgaaaaacagattttctactgatcatattgattattttgagagattcatttctctttggcttgcttaggagtagactcccacatcattgctagt(A)10	122	-	CCAAGGCTTTCTAGCCTGAAT	AGGGAGGCTGTTGGATTTTT
chr1	10117454	10117823	p2	(TA)35	70	-	TCTACTCTCAAACGCGTCCC	TGCTTGAAGCGATAGTGCAT
chr1	10160193	10160615	c	(AG)7aatactcatcatcaatgaataccataccgagaaagacatttgggtctctcaaacgaaagatggtatattgtgtct(GA)17	123	-	CGATCCGATCCAGTCTAAGC	TGGGACCACTCAAAGTACCC
chr1	10175187	10175569	c	(T)11ataaattatatatcttcatattagccaaatatttcacacttgcaatcataattctacaaaag(A)10	83	-	ATTTTGCCATGCCATTAAGC	TTGAAAATCATACAAGGAACTTCG
chr1	10224441	10224872	c	(A)17tttcggcaaaaattaaggttctggtccgtttttaaagagcggactagtacaaaagtacttcggtccgttcattaaaaacggaccccc(A)17(T)11	132	-	CCCACGAAGGCAAGTTGTAT	TCATGGACGAAATGAGCAAA
chr1	10234844	10235195	c	(A)41c(A)10	52	-	GAAATCGGGTCTGGTGAAAA	GAGTCATCCCCGAGATTGAA
chr1	10242697	10243050	c	(A)10ggtcaaaaatcaaaaatcgaaaatcgagaaatac(A)10	54	-	ATGAATGCGGCTTTAAATGG	TTGATCTTGATGACGCGAAG
chr1	10312552	10312919	c*	(T)15aacgtatatttaataggttttgttttttt(TG)6(G)13*	68	-	GAAATTCCCCATCATTTCCC	CCTGGAATCAAAACAATGCC
chr1	10336707	10337081	c	(A)10ttaaaattaacaactatgaataccatcaaaagaccatttaacgagcttgc(T)15	75	-	TGGTAATTGGGGTGCCTTTA	GGGGGATCTCAATTGGAAAA
chr1	10346684	10347148	c	(T)10cgacggccctagactatcaaattattggataatgagcttcaaaaaaaag(A)10ttccataaaatatgatcgtcgaatttagaggtttaacaaacaataacactatcctctaattcaccaatcataataaaagaaataat(A)10	165	-	TGGAAACCGAACACTTGTCA	AGTCTAGGGCCGTCGAAAAA
chr1	10361590	10362064	c	(T)11ctatgttgctgtcagcaacactcacaactcataactcacacaaatttat(A)22ctaagaatttcgtcccatgtagcattgaaacgtggtttggggtgtccagtcttgctgttatttaacagcacccactcttgcta(T)10	175	-	TTCGTCCCATGTAGCATTGA	GGCAGCCAACGTAAGAAGAG
chr1	10362097	10362558	c	(A)12gctgttgcttcattattggtggtgaagacagagagagggagagaggtggtga(AG)17acgtctctctgctcttttttgagaaagagatgagagagatacgtctctctgctg(T)10	162	-	ATGTTGGGGCGGTTATTACA	AAGGCTGGTGTGCCATTAAA
chr1	10362423	10362910	c	(T)10aaaatgttgctgccactttgcagcacaaaagagg(T)14aaaacgtggctgccctgtggcggcacaaaatttttctttatataaaaacattgctgccctttggcagcacaaattt(A)18cgtggctgcccgttggcagcacataa(T)10	188	-	CTTTAATGGCACACCAGCCT	TCTTTTGTGCTGCAAAGTGG
chr1	10372879	10373235	c	(G)15c(G)41	57	-	CCCCCTTTTCTAATGTGCAA	TCTTGGCTCTTCGAGTTCGT
chr1	10376925	10377286	p2	(AT)31	62	-	ACGTATGAGCTTGGTGGTCC	TAGGCCGAGTGGCTACACTT
chr1	10463797	10464198	c	(T)13ggaaaatcttgttcttatgaaaaatatttttttggaaaacgttttttttagaaaatattttttctagagaataacac(T)12	102	-	TCATTTTGTAAATTATTTGTCCCTT	AACAATCCTGATGGACAGGG
chr1	10474875	10475242	c	(A)10caaactcaaatactattaacatgcaaag(ATAAAA)5	68	-	TCATGAAAATCCAATTCGAGC	GGCATATTGATGAGGGCAAT
chr1	10475193	10475623	c	(A)16ctcttctaattctaccaacatgcaaaaataataaaaaaaacgtaaactaaatattctcctaaccctatcgatatac(A)11taataaataaaaaaaaat(A)10	131	-	ATGCTAGGATCCGATTCCTTC	CTTGCTGCAACAGCCAACT
chr1	10492907	10493272	c	(T)10gacggccttagactatcaaattattagaatgaacttcaaaaaaaag(A)10	66	-	TCCTTGCTTGAAAACCGAAC	CAAAATATTTGACGGGAGGG
chr1	10508288	10508637	c	(T)16atgttatcttctctttattttgaa(T)10	50	-	AACATTTTGTCTGGGTTAGTGAAA	AGGGTGAAAACCTTCAATGG
chr1	10509363	10509739	c	(TA)9tttattgattttttgtattttcttgatttttgatttttgtattatta(T)12	77	-	CAGCATTGAAAAGCAACTCG	ATCAAGCCTCATCGTAACGG
chr1	10522346	10522697	c	(T)10attattttctcgtt(TTTA)7	52	-	AGCCCAATTGGATTGGTATG	ACGGATTCTCCAACTCGAAA
chr1	10538391	10538760	c	(T)12caattttacgaatgaactaatcataaaaggacttctca(T)20	70	-	CCGTAAGAGTCGCACATTCA	CCACTCGCCACTTTTTGATT
chr1	10581375	10581808	c	(AT)23(AG)10ggtcaaggttataagggacaaaattctaaaaactttcaaaagaacaataaaaa(AAT)5	134	-	GGGTCAAGGTTATAAGGGACAA	TGGATGACTAACGAACTCCAAA
chr1	10624871	10625358	c	(GA)26cagagtcacagacagattcgagagagattgagaagaacgacggattcgacagagagcgagagtgagagtgagagtgagataagagc(AG)6aaccgagcgtgagagaaatctgaaatt(A)11	188	-	TCGACAGAGAGCGAGAGTGA	TGCGCTAAAAACGACTGCTA
chr1	10630217	10630633	c	(T)13atttttatttta(T)15ggtttctttctataagttcaagtgttcttgagattttaagagagaagaaagaagaaaaaaaacattg(A)10	117	-	CCGGGGAAAGGTAAAGGTAG	TTTCGTTCTACCCCAAATCG
chr1	10662602	10663002	c	(A)10tactatcaccacaccaactcgcacgttacgatttgattttataaggttagaagcaatttgtgctgcc(GA)12	101	-	GCTGCCGAGAGAGAGAGAGA	AATCTTGAACCGGCGAGTTA
chr1	10695331	10695686	p2	(AT)28	56	-	GGGTCAGGTTCAAAGGACAA	GGATGATCCCCTCATCACAG
chr1	10696014	10696397	c	(TC)6acacgtctcctggtctctactgaaatcacagagaaacgattgaagcccacgctctcacaa(CT)6	84	-	CAAGTGTGGGACAGCTGAGA	TGGGCTTCAATCGTTTCTCT
chr1	10762820	10763216	c	(TC)7tttgcaaagaaacggagagctcgataaaagaaatcctaaggtaagaaatcacaaacccttaattagc(T)16	97	-	GAAGGTCACGGTCTTCCTCA	CGATGATTCGTCAAAATCCA
chr1	10766870	10767266	c	(A)18ctaattaagggtttgtgatttcttatcttaggatttcttctatcgagctctccgtttctttgcaa(AG)7	97	-	CCCAATTCAACCTCAGCATT	GAAGGTCACGGTCTTCCTCA
chr1	10768908	10769314	c	(A)14ttttataaatgttcctcgaaatatttatacttgatttttttcttaaattattaaaataatggaactataggtc(CTTT)5	107	-	AAAGAAAGGTTGTAGCCGTCTG	TGTATGGGTAGCGTTCTGTTG
chr1	10771603	10771982	p2	(TA)40	80	-	TCGTGATAAGGAAAGAACTCCAA	AGGAGAGAGAGGGATGAGGC
chr1	10774692	10775127	c	(AG)6atccgattgaaatctccaaatctctctgcaaagcaagaattcgtgggctgctggttttgatcggcaatagacgtgtaaaagagtaggatttcaa(T)10gtttt(A)15	136	-	CCCAGCCAAACTCCATTCTA	CACGTCTATTGCCGATCAAA
chr1	10775034	10775507	c	(A)13taaataaagaatacgtgattgagggaaaggtcaagaatt(A)12ggttttgttagaacaagaacgattgttctgaggtcgtccatagtgcctaaaagaatgaaatagatagagtctgatttaacagaaatgccctcgatttc(A)12	174	-	CGGTTAATCGACTGAGTCCC	TTGAAATCGAGGGCATTTCT
chr1	10775319	10775738	c	(T)10agaacttcaatagtgctgataattttcttttgttggtactaaaacattgatgtagcaaggcttcaaaacggtgaacaaaatctatatgcacaaattttta(T)10	120	-	TAAAAGGTTTTGGTGCTCGG	CCGTTTTGAAGCCTTGCTAC
chr1	10793768	10794137	c	(T)14aag(A)10gagttttttgtttgatttaacaacatagaatt(A)11	70	-	TTTCGTTTTGTTCATGTGCC	TTACGGTCCAATCAAGGGTC
chr1	10840799	10841200	c	(CCA)5ttacactaacctcgtcgttgtcgtcatcgccgtcgtcaccatcgtcgtcgctgttggttccgtttccgaccacct(TC)6	102	-	TTTTCCACCCCATTCAAAAA	CGGTGGTAGGGAAGAATTGA
chr1	10862378	10862739	c	(TTC)5atctacctcttcattttcttattcttctt(CAC)6	62	-	TAACAATCCCAGATTCCCCA	GGGAGGAGAAGGAGGAGTTG
chr1	10872973	10873334	p2	(TA)31	62	-	CTCACCAAAAATCAGCCCAT	CATCGCAATTGTCCATCGTA
chr1	10881865	10882217	c	(AC)11agtaaatgaaatgaagcaatt(A)10	53	-	TGAGATCAACATGGGTCAGG	TTCACACTGGTTTGCTTTGC
chr1	10892501	10893037	c	(T)12ggacatgaaggggtgctgttttttaatggaggtagccccaaaaaacg(T)10ctaatttatggagaggaagaagatagggaagggtagagatgcaaggtagagagaggaaggaatattagagaaggaaacgtggggatcaaagatgt(GA)6tgagttgctgatttttttttaatggctgtcaaccatgaaaacgttttttc(T)11	237	-	GACATGAAGGGGTGCTGTTT	CCTTGTTGTCCCACGTTCTT
chr1	10899096	10899467	c	(AATA)5aagactatgcattgtttgtagtccaagttctaacaagaacat(A)10	72	-	ACAAATGACCACCAGCTTCC	CTATCGATGCCACGAAGTCA
chr1	10906996	10907563	c	(AT)10gtttttttaggctttaatcatttttgtatgttgatagggttatgggtttcttta(TATT)5ttcatattgataggaagaggagaatgtttaggtttaatacttcttttttgttcattttta(T)10g(T)11aggttttgtttttatttttattctttgcatgttagtaggattaggaggatattttgtttacatatattttttctg(T)17	268	-	TCATCCTCACCAAAAATCAGC	TATATGGGTCCCGTTCAGCA
chr1	10920540	10921021	c	(T)10gttttttattatgtttattgtgattggtgaattagaggaccgtgctattgtttgttaaatctccaaatttgacagccataccctatgga(T)12gtgtttttttgtgtttttttaagcccattctccaataatttgatagttcagggtcgtc(A)13	182	-	GGTGAATTAGAGGACCGTGC	AAATTTTGATGGACCCTCCC
chr1	10944404	10944809	c	(A)11tgttaatgggaaatttagatgttatattggtttgtaacttgtcctggccttccaaagactaccattttatttggaaattaaagtg(T)10	106	-	TTAGAGGCCACTCTCAGGGA	CGGGGACTCTTAGAGCAATG
chr1	10955226	10955668	c	(T)15gtcttggcatattgatgaggacaatac(AT)12aatgtttttttaggctttaatcatttttgtatattgatagggttaggggtttcttta(TATT)5	143	-	CTTGGCATATTGATGAGGACA	AAAGAAACCCCTAACCCTATCA
chr1	10955510	10955862	c	(TA)6(T)10ctgta(T)26	53	-	GGAAAGAAGTTGTTTTGCTTTTG	TCAGCAACATTTATCATTCAACG
chr1	10981696	10982300	c	(CAC)8tatatctaccatcacactaaccttgccatcgtcgtcgtcatcatcgccatttcccaccacct(TC)9cccgctttcttcttttccttctctcaccttcgtcaccaccacctccacgttctctcctcttcttccttacttacctccgtcg(CCA)5cgtcctctccctccctcttatcattttccaagcctcttcttctccgtcccaagtctttttctcttctctcatcttcttttttcttt(CTC)6	305	-	ACCACCACCACCACCACTAT	GGACGGAGAAGAAGAGGCTT
chr1	10990578	10991177	c	(CAC)6tatatctaccatcacactaaccttgccatcgtcgtcgtcatcatcgccatttcccaccacct(TC)9cccgctttcttcttttccttctctcaccttcgtcaccaacacctccacgttctctcctcttcttccttacttacctccgtcg(CCA)5cgtcctctccctccctcttatcattttccaagcctcttcttctccgtcccaagtctttttctctttctctcatcttcttttttcttt(CTC)6	300	-	ACCTTCGTCACCAACACCTC	GGACGGAGAAGAAGAGGCTT
chr1	11015143	11015508	p2	(AT)33	66	-	AAGTTACTTCAGGCCCGACC	CCCTTGTGTGGCATTTTCTC
chr1	11056782	11057192	c	(T)14aatttataaatataagtaatgccaaagggtagattgacacaaaactaaaaaaagctaaaaaaaatgtcaaaagacaaatcgattcct(A)10	111	-	CTATTAGGGGCACACCAACG	TGTCAATCTACCCTTTGGCA
chr1	11068209	11068683	c	(T)10atatccaaatgcaacaatgaatctgtcaagtaaatttctaaa(T)10ataaaaaatatgtgttgtttccacatgggggagatcaaaggcctttagctagatctgaattcttgctaaattggtgaggatagcctcactccttttgc(T)15	175	-	ACATTTATTTGGCCACGGAG	AGGGTGGTTTGCTTTTCTCA
chr1	11069255	11069774	c	(A)13gaaa(T)11actatttcactatttttttcatgctgtcaatggacagcatgctaaaattatttat(A)17ccaaagtgttgtcgaagggtgcaacgcacgcctttaaacaaaaatttatttttatgtttttaaaaaaaaa(T)10aaatatttaatgatggaaccttaaaacaac(A)10	220	-	CCAAAGTGTTGTCGAAGGGT	GGTTTAATTGAGGACGGGGT
chr1	11073855	11074224	c	(TA)13agaaagaaagagagagagaa(AG)12	70	-	CCTTGAGAGCTCCTAATGGC	GCACCTATTCGGATCAAGGA
chr1	11090882	11091302	c	(T)10atttttcatttttccaatgcccttagtttggcattaa(T)10gaacttttcaataagatactttccttttggatgatactttctttaaaata(AT)7	121	-	CAATGCCCTTAGTTTGGCAT	CAAACCAATCTTGGGAGGAA
chr1	11097623	11098150	c	(A)11cttacttatagcatgaagcaatatcaactggattccttcaggtccaattcggagactcgcgagtacttgccgttgcgggtacacaagaaac(AG)37ggagaagaagatggagctgctggttcttctctctttg(T)15	228	-	CTGGATTCCTTCAGGTCCAA	CCAGCAGCTCCATCTTCTTC
chr1	11110814	11111182	c	(C)13aagccccccaagccaaaaattcagcctcttattttttattgtttc(T)11	69	-	CAAGCCAAAAATTCAGCCTC	CGTGGGATCACCACTCTCAT
chr1	11136349	11136708	c	(T)16caaacaaaagga(T)12gaagtaaaac(A)10	60	-	CAAAGCAAGCACACCAAAAA	TCATGCCCTCATCAATTCAA
chr1	11136524	11136893	c	(T)14aaaaaaaaactgatttttattttaccaaaacacaaaaataaaagc(T)11	70	-	TTGAATTGATGAGGGCATGA	CCAAAACAAGTTGGGGTGAC
chr1	11200797	11201217	c	(T)21attttatttta(T)10ggtttctttctataagttcaagtgttcttgagattttaagagagaagaaagaagaaaaaaacattg(A)13	121	-	CCGGGGAAAGGTAAAGGTAG	TTTCGTTCTACCCCAAATCG
chr1	11210552	11210970	c	(T)10aaatttataaaacaaaaaacaaaattaaaagaaaaagaaaaaaaacaaaaaaaatcatgttgctaccagcaacactaacaacccaaaactcta(T)16	119	-	TTTTAGTGCCACGTGGTGAG	TGGGTTGTTAGTGTTGCTGG
chr1	11261019	11261469	c	(A)10caaaagaagaaaaagaaag(A)13ctagagaggcatctatccacaatccaaaccaaacttaacaacattacaagcagcacaaaaagtttgttggggggttgatgtgtgttaccccatattctg(T)10	151	-	CTGTGCATGGTTTCCATTTG	GTACTCGAGACTGCTTCGGG
chr1	11263059	11263418	c	(TC)13(TA)17	60	-	AGGGTGGAGAGAAACTGGGT	ATCTCTGGAGGCGCTTGTAA
chr1	11299989	11300397	c	(TTA)5tttaattagttttttttagacatgtttgtggaatcatttggttaagtagttg(T)10cttttctcttttaatattttga(T)10	109	-	CATGTTTGTGGAATCATTTGGT	TCTCAGCCTTGCAAGATTCC
chr1	11314504	11314906	c	(T)10aatcggtgttgctttgataataatctttttttctttctcatctaaatctgtgcatgatgaatgatatcaaagaagaa(T)16	103	-	ATGGAATGATGGTAGCTCGG	TCTTATGCACCAACAGCAGC
chr1	11347293	11347722	c	(T)10gtttg(T)14gttttaaattgaattttgttttactaagcgacaactatcctttaaccaaaattgtttttgagaacaaaagg(A)11tttatttg(T)11	130	-	AGAAAAATCTTTTGCCACGC	AAAATTTGTGCACACCCAATC
chr1	11359443	11359828	c	(T)11attcgtatcgtttttccatattaataggctagggggatatttttaggcttgatattactc(T)15	86	-	GGGTTCCCAAGTATTCGTTGT	GCAAATCCGACTCGATCCTA
chr1	11435838	11436313	c	(T)12acattcgtttgtgtgattggtttagatcccaatctggatcataatcattttagc(T)10ccatttgtttcttctttgattcacctcgttttttgtgtcttttctccaaatttcacgcaaaatcctctaattttatttaattttcta(T)13	176	-	CCAAATTTCACGCAAAATCC	TTTGCAAGATTTGCACAAAAA
chr1	11462332	11462734	c	(AC)6ccagctacacccacccacccacccacacacacctactcactcatacagtaa(C)14(AC)6ca(C)12	103	-	CACACACACCCAGCTACACC	GTCATCTCGACTCCAAGGGA
chr1	11463678	11464064	c	(T)10atagagcagggtattcgcgtcccttctgggatggagctagtccctacgatcacacgcaggg(CA)8	87	-	GATGGACTTGGGCACAGATT	GCAATTGACCTTTGAAGGGA
chr1	11465465	11465819	c	(A)11ttcccctagtgaaaatagaatacatgaagtact(A)11	55	-	CCACAAAGGCACACTTTCCT	TGCATTCTTTTTCTTTGGGC
chr1	11519147	11519512	c	(TC)6atctcaaactcgacgctgatttctataggttaagcatg(CT)8	66	-	ATCGATGCTGATCTCTCCGT	CAGCGTCGAGTTTGAGATGA
chr1	11549163	11549536	c	(A)11gaaaaaacaaagaggtggtgtgaattggggtgctgcagcaacatatagaaaag(A)10	74	-	CACCAAATGATCATCCGTCA	CCCAATTCACACCACCTCTT
chr1	11561170	11561520	c	(A)11tttataattattcatctcaaaaacaaaa(AT)6	51	-	CATTCGTCCTCAAAAAGGGT	ACCAGAACACTCATATCGTTCA
chr1	11580909	11581317	c	(A)11ccaacaagggggtcccatccaaagtttttttggagttacaaaactttaaaaaaaaatatttttatttttatcttttttgaagaaa(T)13	109	-	GGGTCCCATCCAAAGTTTTT	TCTCGCATGTTGATCACTCC
chr1	11591521	11591880	c	(T)12aagtccattctctaaaaatttgatagtccagggccgtc(A)10	60	-	TTTTGAGAAATTTGACGGGC	TCATCAGTGGTGATCTTGGG
chr1	11592133	11592499	c	(A)10ctaactatcactatgcgtagtaacatcgattaaaaaaattattatat(A)10	67	-	TGCACAGATTGAAAAAGGGA	AGCATGGAATGATGGTGGTT
chr1	11600491	11600908	c	(TA)6aacaggaatcgtgataatctgactatctcacgtatgggaaattcaacacaactatcctgatgtgataattttggaatttttccctaaaaa(AT)8	118	-	GCTTCTCCTTAACCTTGGGG	TCTCATATGGCCCTTGAACC
chr1	11621605	11622024	c	(T)21cagggtccgtttttcaagtacggacctagcactttttggctggtccgtgcttcaagtccggaccagaacatcaaa(T)24	120	-	CGTTTTTCAATCACGGACCT	TGAAGCACGGACTCAAGAAA
chr1	11660400	11660811	c	(AC)6ccagctacacccacccacccacacacacctactcactcatacagtaaccccacccacacaccagca(C)11t(AC)11	112	-	CCAATGAAGATCACCTGCAA	GGTGTAGCTGGGTGTGTGTG
chr1	11680519	11680949	c	(A)11ttataaaataaattcttttttttgttaatcatgtgtccattaatagtatgaataaaaaaaatt(A)12ctctttatttg(T)23(G)11	131	-	GGGGGTGAGTGTTGTTCTGT	ACTGGGGACACACCACCTTA
chr1	11681154	11681504	c	(T)10aagctgtgttgtttcattctgaaaatcga(T)12	51	-	AAAATTTCATGGCTTGCTGG	TCAAACGTACAGTGCAAGAACA
chr1	11718718	11719143	c	(A)19ggctcctctaaagtatgagacatggaaggggttctgaaaaagaaaaagaaaagggaactcctctataatatgggatttagaagggttttgaac(A)14	126	-	CATGGAAGGGGTTCTGAAAA	CTTCAAAGAAGACGCCCTTG
chr1	11737884	11738285	c	(TC)6ttagtcgatctctctcgctctctctcag(TC)6ttagtcgatctctctcgctctctctctcgatctctt(TC)7	102	-	CCTGTCTCTCCGTCGATCTC	CTCCGTCTTCAACTTGGCAT
chr1	11739151	11739512	c	(T)11gtaagttcaatttaaaaaaaagaagttaaattatcttttaa(T)10	62	-	TTCCACGATCACAAAGTTGG	TGTATTGAGCTGTGGGCAGA
chr1	11779625	11780033	c	(A)11ccaacaagggggtcccatccaaagtttttttggagtaacaaaactttaaaaaaatatattttttatttttatcttttttgaggaaa(T)12	109	-	GGGTCCCATCCAAAGTTTTT	CCAAATAAGCTTGCGGTCAT
chr1	11780514	11780983	c	(CT)18(TC)14tttctttgttgtcatttctttgttacgtgaaaagaagatagaaaaagaaaagaacgattttttgctaacagcacaccacgcacaatggtattg(T)13	170	-	TCCCTTTCTTCCCCTCTCTC	ATACCATTGTGCGTGGTGTG
chr1	11780854	11781225	c	(A)12ctaaccaccatcactatgcgtagcaacatcgattaaaaaaattattatat(A)10	72	-	CCATTCAGCATGCACAGATT	ATAGAATGCTGGTGGTTGGG
chr1	11782867	11783276	c	(TC)8attatttattccttgtaaaatcaaagatgagtaatgggcttcccatcttcgtaaaatcaaacacgataaaaggttggtcatttt(A)10	110	-	GGCATGGCGAATTTTTACTG	TGGGAAGCCCATTACTCATC
chr1	11789266	11789688	c	(AT)6acaggagtcgtgataatctgactgtcccacgaatggcaaactcaaatgactgtcctgatgtgacaattttgaaatctttccctataaaa(AT)11	123	-	TCATGGTGAACAACGAAAGC	TCATTTGAGTTTGCCATTCG
chr1	11809987	11810348	c	(T)12aaagctcattctccaataatttgatagtccagggccgtc(A)11	62	-	ACAGGCATATTTGACGGGAG	TGGGGAAGTGCAATTGTGTA
chr1	11811626	11811984	c	(TA)23t(TA)6	59	-	TCGGAGGGATTTGAAAGTTG	CTTTGAAGGATTCGACGCAC
chr1	11826714	11827100	c*	(T)10aaaatagagttttttgttgggggggatgatgtatccttcga(TATTTT)5(T)10*	87	-	TGTGGCTCAGTCGAATGGTA	TCGAAGGATACATCATCCCC
chr1	11827254	11827711	c	(A)17cccgactcgatttaaacgatttttcattagaataaatcgg(T)15gttttgtcctccatgatcgctggttcaagcttgattaaaaccgttgttttcttctgattcaaagtatagtt(A)15	158	-	GGTTCAGCGTTTTTAACGGA	AAGCTTGAACCAGCGATCAT
chr1	11842105	11842459	c	(A)14tgcaatacccaaaagcatctacaatcaagac(A)10	55	-	TTCCAACCTTCATCATTCCA	CCACTGGGGACTATTGAGGA
chr1	11849698	11850128	c	(A)10gctcgctagattgaaaacctgaaaaggcgatctaggcaaaagttagagcaagctcgatagattgaaaacctagaaaggcgatctaggcaaaagtt(A)26	131	-	AATTAAGGCAAGCTCGCAAA	ATCGCCTTTTCAGGTTTTCA
chr1	11955403	11955858	c	(A)11caaataattaataaaaaaaattccttttt(A)22cgttatcaaacatgtttcttaaaaacaacaaattattcgctatccaaaaatggatcgacataccctaaaatgaggaataact(A)12	156	-	TGACAGCATGTCTCGCCTAC	CGATCCATTTTTGGATAGCG
chr1	11973448	11973865	c	(GA)6tggagaggccgatcgatcaagagagcgactgtgagaaagagatggggaggtcgatcag(GA)6aataaagagcgatgtcgatc(GA)8	118	-	AAAGAGATGGGGAGGTCGAT	TTTTGATACCCAAATTCCGC
chr1	12007436	12007826	c	(A)10tccggttaattcggttcggttccggattaagaatataataaaccgaaccaatccgaaatccgaaccgta(AT)6	91	-	CGGATTAAATACACCCACGG	CGATTTACAGACCTCCCCAA
chr1	12026360	12026711	c	(T)10attcaaaagtccttcagagatcctcc(AT)8	52	-	CAGCAACAAACATTTTGGCA	GAAGTTTTGGAATGGGCTGA
chr1	12027903	12028280	c	(T)12caaataattatgtttggtgaaaataacacctacagtttgggtttgagagggaag(A)12	78	-	CAGATCCGATCCGGTTAAAA	TCCCTCTCAAACCCAAACTG
chr1	12046594	12046975	c	(T)11atgtgttcagttcttttaagtaggcaagttgtcctaacagcaagaaaaaaatgatgcaac(A)11	82	-	AGTTAGGCGACAGCACCACT	GCTGCCATTTTCAGCATGTA
chr1	12055820	12056206	c	(TA)12t(TA)13(AT)18	87	-	TGGCGTAGAGGCTCAGAGTT	ATCCCTTCAGGCATTCACAG
chr1	12069486	12070355	c	(T)11aacttttttaaaatttttttaacgttttttttaaacattttttaacgttttttttaatttttttttacatt(A)10catttttttttattttttttaacgtttttttatttaaaaca(T)10acgattttttttatttttatttttttaacgtttttttatttaaaaca(T)10acgattttttttatttttatttttttaacga(T)11aatttttttaaacgtttg(T)10gtttaaatgtttttttttatttaacgttttttttaactttttttatttaaaactttttttttcaaacattt(A)13ttaacgttttttttaactttttttatttaaaactttttttttcaaacattt(A)13ttaacgttttttttc(T)15attttaaac…	570	-	TTGAGGATCACTTTGGGTGA	AAAACGTCATAACTCCTTATCTCTACA
chr1	12089270	12089659	c	(T)13aataaaaactcactgatctttactttttgatttttctttttttttcgaaaccaattaatttccc(T)13	90	-	GTTGAACCCGATCAAAAGGA	TTGCCAACAGCACATGATTT
chr1	12090433	12090795	c	(A)13tcgtttgtcatcaccaatgaatcgccataccttaaaat(A)12	63	-	AGCATCTCGTGCCCATAAAT	GTATGGCGATTCATTGGTGA
chr1	12119128	12119487	c	(TG)6ttgtagcgagcgagagagaattgcaacaagagaa(AG)7	60	-	CCTATCTTCGTTGAGGGTGG	TCTCGCTCGCTACAACACAC
chr1	12120358	12120756	c	(A)13gcccattccgaacctttttgcccatacaagacaaaacacattatagctttatgtgtatacggatcctgatcc(AT)7	99	-	AGCACAGAGTCAACGCCTTT	TGAGGAGATCATCCTTGCCT
chr1	12191891	12192302	c	(T)23aacattgacaccctcagcccattatcaatggaacctaaaacaatctt(A)12gcaacaataaaaacaaact(A)11	112	-	ACACCCTCAGCCCATTATCA	GTGAATCGCGTAGGGTTGTT
chr1	12211424	12211781	p2	(GA)29	58	-	GAGGTGGGTCATTGATACGG	CGCTGAAGTGAAATGACGAA
chr1	12219131	12219532	c	(T)10acttcttgattgcttgatctgatccatctatttttgtggtttgtaaaaatttggtggcagtaactattgatagttttatc(T)12	102	-	TTCTGAATCTTCTTCGGGTGA	GTAGAACAGGGCATGGGAAG
chr1	12230170	12230541	c	(TA)10t(TA)17t(TA)8	72	-	ATTACGGATCCTTATGGCCC	TTTAGGAAATGCAAAGGGCA
chr1	12233512	12233979	c	(A)10gaa(T)10cttggagagaaatccagcgattctatttgacttgaggttgaagatgggatac(AG)27aagatgatcaaaggagttgccaga(G)15	168	-	TTGGAGAGAAATCCAGCGAT	ATCATCTTCTCTCCCTCCCC
chr1	12240260	12240625	p2	(AT)33	66	-	GGAAGATGAGGCGCAGTTTA	GGCTGTTTAACCGTTCACAAA
chr1	12284980	12285398	c	(T)10ataaataaaaaatcttaagcgtgtgtttgatctatcggtcgataatttttttttaaattat(A)10caagtcgtgctatccattgacagcaagc(A)10	119	-	TGTGCGATCTGTCTTTCGAC	ACAACGAGAGGATGCTGCTT
chr1	12296336	12296717	c	(CT)8atctctttcctagcatgcactgtcctctcaggaaaaaataacaa(CT)11	82	-	ATTAAAGCACCTCGCGGTTT	GAGAGGACAGTGCATGCTAGG
chr1	12296958	12297330	c	(AT)8agatatatata(AT)23	73	-	CATGCACTGTCGTCTCCTTC	TGGTGCTTTAATGGGAGTGA
chr1	12297254	12297626	c	(TC)8tttcctggtatgcattgtcgtctcagagagcataaacaa(CT)9	73	-	TAAAGCACCACGTGATTTCG	CGACAATGCATACCAGGAAA
chr1	12310093	12310535	c	(T)19aaaggggaa(T)11attagtttgttttttcgcttattacgtaggtattcaatttcttttagtaggcaagacatgctgtcctttgacagcatatagaatttc(A)17	143	-	GGCAGAAACTTTCGTTGGTG	GGGGTGTGAAACAGAAAACAA
chr1	12338473	12339115	c	(A)15tagttcattactctttcactccgggtaggtagagtagaacttccc(A)14ttattttactcttcactccgagtaggtagagtagaactttcc(A)11tagttcattactctttcaccctgggcaaggtagagtaggactcctaaaaatttagttcattactctttcactccgagtaggtagagtagaactttcc(A)10tagttcattactctttcaccctgggcaggtagagtaggactcttaaaaaattagttcattactctttcactcgagtaggtagtagagtagaactttcc(A)11	343	-	CCTGGGCAGGTAGAGTAGGA	TGCCCAGGGTGAAAGAGTAA
chr1	12339018	12339466	c	(A)24ttgttcattactctttcactcggataggtagtagagtagaacttcc(A)14tatttagttcattactctttcactccgagtaggtaaagtaaaactttcc(A)16	149	-	CCTGGGCAGGTAGAGTAGGA	TGCCCAGGGTGAAAGAGTAA
chr1	12370257	12370631	c	(A)10ttaatttttttattgttgttcatgacaagtagaggattccaataaaaaatcgt(A)12	75	-	CGTGGTGTGCCGTTAGTAGA	TTTTTGTTTCTTAGCGCATCA
chr1	12406315	12406733	c	(T)15aatgataatcgtcggtgctcatagaatattagaatccacacttcaccgatcggctaggtttgagtttcaaaagaacttgctaatgttttgcttc(A)10	119	-	GCCAAATCGATGGTTCTCAT	CTAGCCGATCGGTGAAGTGT
chr1	12502238	12502598	c	(A)10ttattacaaagagatcaagaaaagtaaaactaaaagaaagg(A)10	61	-	CCCAAGAAAAACCTGATCACA	GCATATGTGTTTTCTTAGGTCTCC
chr1	12506981	12507383	c	(T)14accttttgactattggtgattgatcgatcttaaagggtgtatttcctcataaaacataaatatctctaaatctga(G)14	103	-	AAAGCACCCCTCCATAAAAA	TTGAAGATGACCTTCCCCC
chr1	12508823	12509229	c	(AT)19aatgagtaaagagaaatgagcaacagatatatc(TA)18	107	-	TATGCAATCTCTGCAGGTCG	TTTCCATCGTTTGGATGTCA
chr1	12577832	12578217	c	(TA)12tt(GA)13gtgtgtcgtgctgagaataacatt(G)10	86	-	TTTAAGGCTTCCAAACGCTC	TGCTTTCATTGTGAGGGACA
chr1	12581757	12582438	c	(AT)8tttaacccgatgaatatgcgaagataaataagaaaaacatagaaacattatacaaaaaaagaaaaatataagactt(A)14cttacttatagcatgaagcaatatcgaatggattccttcaggtccaattcagagactcgcgggtacttgctgttgcgggtacacacat(AG)18gtgggctggtgtggctgttatggatggagcattgctgc(T)18gattcaaaagcttcttaatcaacacgtacttctcttcaagtaattgctgtttttgtagggaagatgatggttgcaagccccttta(T)11	382	-	AACCCGATGAATATGCGAAG	AGTACCCGCGAGTCTCTGAA
chr1	12582898	12583262	c	(AGA)5ggacgtgcgttggagaagaagaagagaaaaaaacgtggg(T)11	65	-	AGTGGGAGAGATCATGGGTG	GCGTAGGATTCCCCTCTCTC
chr1	12639078	12639478	c	(A)19tccaaatttgaaaatctgaatcgtttgatcc(T)38(G)13	101	-	AGGTGGGGGTCGAAAAATAC	AAATCAAATCAACCCCTCCC
chr1	12683776	12684129	c	(T)11ctttaatcttcttcaatccatcttttctacatg(T)10	54	-	GCGTTCCACCTTGATCTCTC	TGGGTTGGTTTCTGAAAATGA
chr1	12695534	12695928	c	(T)23gaaaagtaaagaatttattaaaagaaggtcaagaaaaacaaccaaaggatacatgg(A)16	95	-	TTTTCCTCACCTCCAACACC	CCCATTAGATTGGTGTGTGCT
chr1	12730250	12730617	c	(T)13gagattttgaggcacatagtctctgttttttggcttggggtataa(T)10	68	-	GCCTGTTTTTAATGGACGGA	CCCCTAGGTAAATGGGGAAA
chr1	12775726	12776081	c	(CA)19(TA)9	56	-	ACACGCATCCCATACCATGT	GTGTGTGTGTGTGTGTGCGT
chr1	12918350	12918870	c	(GA)9gcaacgaaccgccgcccgccggagttgagcccgcagccacacgttagcttcgagaga(AG)7tagtgggaaataaccaaagagttttaaaaacattaaggaggagtctctctgtcgttctgagatggattggatttgtagagaa(AG)7aacaagaaaaacg(T)23	221	-	CTCCTTTATTGGAGGTGGCA	CGGTTCGTTGCTCTCTCTCT
chr1	12947265	12947665	c	(A)10cgaaagaaagagggaaaattttttgtttttatcatttgtttggcaagatgtgctacccattgacagcacatagattt(A)14	101	-	GGCAAGATGTGCTACCCATT	TGGCAGAAACTTCAAAGGAAA
chr1	12964649	12965034	c	(AT)16gggaaatgttcaacaccctaagctttaccatacactttaa(AT)7	86	-	TCTGCCCATTCCAAAACTTC	TTCTCACCAAAAATCAGCCC
chr1	12969194	12969604	c	(CT)9tcctttctctcgcctctcggtaaaatccgaccgacggaccataaccatcgtgaccgacaagcttccaaagatacaca(CT)8	111	-	GAGGGGTTTTTCGACTGTGA	GGTCACGATGGTTATGGTCC
chr1	13053652	13054063	c	(T)10aagttcgatttattttatttatgtttgtttatttgaaaaatcccaagtagagcgttttagtgaagataaattgatgatggttggacaacgaa(T)10	112	-	TAAGTGGCGACTTCCAAACC	AGCAATGCTCCCATACTTGG
chr1	13053874	13054329	c	(T)10cagtttttaaattttttagtgagtgtttaatctgttggttaatttttc(T)10aaagaaaaaaataattttttatgctaggtgtgctgcccattgaaagcaagaaggaaaactaaaaaaaataaatataaa(T)10	156	-	CCCATTGAAAGCAAGAAGGA	TTACTAGGGGCACACCATCC
chr1	13081657	13082044	c	(A)10ggttatcttttcatattggatagaggggctagcgaagg(TA)14(T)12	88	-	TTTTTGAACCGGGATTGAAG	CGATGCACTTTTCCCAATCT
chr1	13086485	13086884	c	(T)13agggtccgtgcgattgatccttagacaacatgttcttttcttagttttttaaaattaaaaaaaaagtgtatgattag(T)10	100	-	CAGGGTTTCAGAATGGTTGG	TGTCAATGGGCAGCACTACT
chr1	13091213	13091570	c	(A)11ggtattgttgtgtgttgttggcagcaacaataac(A)13	58	-	GTGTGTGCCGATTTCTTCCT	CCCAACAGCAACATCAACAC
chr1	13105860	13106251	c	(T)11aatgttttttttcttctttcttctctcttaaaatctcaagaacacttgaacttatagaaagaaacaaaaag(A)10	92	-	TTTCGTTCTACCCCAAATCG	CCGGGGAAAGGTAAAGGTAG
chr1	13122099	13122539	c	(AT)17ttttagggtccgtttttaatgaacggaccgaagagcttttgtactggtccgctctttaaaaacggaccagaaccttaattttcgcaaa(T)19	141	-	GCTTTTGTACTGGTCCGCTC	CCCCTAGGTAAATGGGGAAA
chr1	13125112	13125546	c	(A)13gaggtgggctgttggagatgatgaagacaaaaaaatggctataacagccaatgcttgttt(TA)31	135	-	TGGAGAAGAGAGCCTGGTGT	CCATTTCCCCCTTTCTCAAT
chr1	13128506	13128924	c	(A)12ttgtttcttagcgtatcactcacaaataatttatttgaaaagaagatgaaaaagaaaaaatcgttttctgctaacggcacaccacacataaaaataa(T)10	119	-	TGGAATCCTCTTCTCATCACG	TTTATGTGTGGTGTGCCGTT
chr1	13133754	13134173	c	(T)10gtttttttagcaattgatgtggggcataattgcattatgatcttcattgtttataattgtgtttggcatctttagatgtataatggtgaaaa(AT)9	120	-	CGGGACCTATCACAAACTGC	AATGCAATTATGCCCCACAT
chr1	13214453	13214806	p2	(TC)27	54	-	AGTGGGGAGAGTTCCACCTT	GGGTCGTGTTACACCGAAAT
chr1	13233466	13233854	c	(A)10ctgaaatcaaagaaaagcgcaacaaaatagaggataaggcggagaaaaaaattatcgaagataaaaaat(A)10	89	-	AAGGCACCACACCCTAGATG	TACGAAGGGAGAGGTGATGG
chr1	13234409	13234764	c	(T)14aattattaacttacatagaatgag(T)18	56	-	TTTTGGAAAACCCTCCAATG	TTGATTTTTCCAACGGGTTC
chr1	13287314	13287672	c	(T)18aaaacaaccctttttttctaaaaaaaaattg(A)10	59	-	GTCCAATCGGGGGTTATTCT	TTCATGAATGTTGAATCGGC
chr1	13299922	13300331	c	(T)18gggatcagaccaaaacgtagttcggatttttccctcccctaggttaggtgaacgggctgagaaagaaaaaggcataa(T)15	110	-	TAGGTTAGGTGAACGGGCTG	AACCAACCAACCTTGACCAG
chr1	13304156	13304563	c	(T)11cttttaaaaaaaacatttataagaacacgcaaacagtgagtcaacccattaaatctctttaagtgcctgccaaaacactcaaac(T)13	108	-	AAGTGCCTGCCAAAACACTC	CGAACATCAGACATTGGTGG
chr1	13304487	13304864	c	(AG)8acaaagagagagacgtttctctctaggttgatgagcatctcaaggc(A)16	78	-	TGAGGGAAAAGCAAGGAATG	GTTGCAACATTGTGTGGGAG
chr1	13311155	13311518	c	(A)10tagttatcttttcatattggatagaggggctagcgaaggaaa(AT)6	64	-	CTCCCCTAGGTTGGTTGGTT	CGATGCACTTTTCCCAATCT
chr1	13315735	13316139	c	(A)18tcgccaattgaaacgaccccatagatattcagtctcagtgatgctgacctttctagaaacctcaccaatctgttc(T)12	105	-	AAATCGCCAATTGAAACGAC	TCGAAATCGTTGTTGACTCG
chr1	13316449	13316875	c	(CA)8gggagagggagggg(GA)7gtaggagaaacggaggagacgttgctgtctactcttctgtttcttctttctcaattgagaagataaaacaac(A)11	127	-	TCTGGTTAGAGACCAACGGG	CCCTGTGTGTGTGTGTGTGA
chr1	13316690	13317124	c	(T)10gagttctcttcttgctgccaagggacaacacgttttgagag(T)14ataattatttttactattttgctaatcttcttcttgctgtctaaggacagcacgct(A)14	135	-	GCACACCACTCATCCCATTA	GGTACGATGCATCCTTGGAC
chr1	13366757	13367175	c	(A)12ttatttttaaaaaatgagaaatttagatccaaggttttgaaaatgagtaattatgaaatctcaaatcaaagtacaagatgaaacttaattt(A)16	119	-	TGCTTGGCAAACTTTCTTGA	TTTCGATCCAAGTCTGTTCTCA
chr1	13367011	13367361	c*	(C)19(A)11(AT)11*	51	-	GCCACGTGATGAGATCAATG	ATGAGTGTTGTGTTGCGAGC
chr1	13367746	13368268	c	(AG)27ggcgtccctgtttgctgtttttcgtttttgaccatatggagaagaagataaaaataacaaaaaccattttctactaacggcacaccatacaaa(AT)14ttttttcttgaaatcctctcctcattaggaacaacatt(A)10	223	-	TTCTTTGGGTTCAAGGCATC	AAAAACAGCAAACAGGGACG
chr1	13414212	13414614	c	(A)10ttccatttatattctaatacttatatagaaaaatccaaatgcctgtaaagggtcattttggatcaccattctttcgtca(AT)7	103	-	AGGGTCATTTTGGATCACCA	CCCCATACTTGCATTTTCGT
chr1	13441695	13442074	c	(T)12aaaaagaaaacaaacaaaaaaaactggttgatgcttcgaccaaagaattctgtgttga(T)10	80	-	TCTTTGCCGAAGAGAACGAT	TCCCCAAACACGTAGAAACC
chr1	13442155	13442518	c	(A)10ttcaaaataatacgtgtttttggccattttaaattgg(T)17	64	-	GCTTGCAAAATTGGAACCAT	TTTAAAATGGCCAAAAACACG
chr1	13462552	13462903	p2	(TA)26	52	-	AAACTTTTGGCCATTGAACG	TAGCGCGATGCACTGTTTAC
chr1	13468111	13468476	c	(A)10gtgatttttgggttgctgttgtgttgtacgttgacagcaagcaaag(A)10	66	-	TTGGGTTGCTGTTGTGTTGT	ACAAATGGGTTGCTATTGCC
chr1	13493669	13494133	c	(A)14ccaaaatcgatttttttacttacacaccagcccaacgctgctattgacagaaacttaaaaagacta(T)12aactcgatttttttttattacatattagcccaatgttgctgtagacagaactaactaa(T)15	165	-	CCAACGCTGCTATTGACAGA	GCAATAATAATGGGCTGGGA
chr1	13520011	13520380	p2	(AT)35	70	-	TCCAAGAGCTAAGGGTCCAA	TTCTTGTGCTCTTCAATCCG
chr1	13547780	13548159	c	(AT)13ttccccacataaaaaaagaatccagaaagaaaaaaattcaacag(A)10	80	-	ACTTCAGGCTCGACCACATC	ACCTAAATGCCCCTTGTGTG
chr1	13566213	13566592	c	(TC)8gttcttgatctctccatagctc(CT)21	80	-	AAACCGCTCTCAAGTTCCAA	CGAAAGGAGAAAGGTCACGA
chr1	13579391	13579784	c	(A)13gattattgggaatgtcttcaaggtagtaggatcaggagagatctcaattgggaaagtagaaagaagacc(TA)6	94	-	ATCCATGCAAGCATCACAAG	GGGTGTGGGTATGTGCTTTT
chr1	13582902	13583297	c	(A)10cattgaagatcaatgggttttaggaaaaaataaagaaataagggttctttgacacaaactgaacatgatgtg(T)14	96	-	ACAATGAAAAATTCGACGCC	AGCACAATGTGAAAAAGGTCC
chr1	13587467	13587830	c	(TA)19agaaagaaagaa(AG)7	64	-	TCCAATTTTGGATAGGCACC	CATTGGAACCACTAGGCACC
chr1	13605301	13605780	c	(A)10tagaaaaaacgttttcatggttggctgccattt(A)11caactca(TC)8acgtctttgatctccacgtttccttttctaacgttccttcatctcttggccttggccttgcatctctaccttatcatcttcatctct(A)16	180	-	TGGCCTTGCATCTCTACCTT	TATGTGCGTTTGGGAATCAA
chr1	13640685	13641039	c	(T)13gacttttttgaatttttttattttattttatg(T)10	55	-	AATTGAATGATCGGGACTCG	TCCATGCATAGAGCACGAAC
chr1	13663649	13664086	c	(A)10tagaacttaagcatggtgctccgatagtgaaaacgtttttatttatctttctatcttcttcttcatatgtgtgctgaaagggacaacaaagagagacgtt(TC)14	138	-	AACTTAAGCATGGTGCTCCG	ACATTGCTGTCCCAACCTTC
chr1	13674049	13674499	c	(T)13aaaatgatgaagaatggttagaataaaataaaacgtttattttgctaaccgcaccccaattgaaaacatgtttggaagttgttgccaacagcccaaaac(T)11a(T)10ctcatgc(T)10	151	-	TTATTTTGCTAACCGCACCC	GTGCTGCCTATGTCAAGCAA
chr1	13722116	13722499	c	(A)17ttgcttacctgtgtgagttgcagagatgaattcctgattgttagatc(AG)10	84	-	GAGGAACCGATTGATTTTGC	TTTGGAATGGATTGGACCTC
chr1	13780609	13781002	c	(T)11catttgtttgatgatatgtatgcttaaaaggacataatcggataaataaagtaaaaatcgga(T)10a(T)10	94	-	GCACATTGCCTCTGGTTTTT	AGGCTCTACCCTCGTGTCAA
chr1	13820096	13820460	c	(T)11aatttctttttttaacaacaatacaaaacagcaacaaataagag(A)10	65	-	GCAGCGTCACAATAACTGAAA	TTGGAATCCATGACCATTCA
chr1	13829763	13830164	c	(T)13cttttttcatttggtttctttctataagttcaagtgttcttgagattttaagagagaagaaagaagaaaaaaaacattg(A)10	102	-	CCGGGGAAGGTAAAGGTAGT	TTTCGTTCTACCCCAAATCG
chr1	13909366	13909736	c	(AT)19a(AT)16	71	-	AGGTTGGAAGGTGTTAGGCA	TGGAGGTTTGAAGTGAATCTGA
chr1	13924193	13924616	c	(A)10ctgtaaattgcaaatcgaagagtttttatgagcgaattcgattgaaaatctaatgaatattgtcagattggagattattgtcgccatgatcgagtttttt(AG)7	124	-	TTGATTTGGAGACCGAAACC	AAAAACTCGATCATGGCGAC
chr1	13999771	14000130	c	(TTA)14(TTG)6	60	-	AGGGGGTGAAGAGGAAAGAA	GCGGGTTCAATCTGAGGTAA
chr1	14003503	14003893	c	(T)20gtggggggggttggtcacatcaaccccctttaataaaatctatctttacatac(A)18	91	-	GGCGTGTAAGCTCCGTAAAG	TTTGTGGACACATGCTGACA
chr1	14010243	14010686	c	(TGG)5cggcggaggaggagat(GA)6aaaagtggtcggagatggtgatgacgatgacgacaacgacgatagtgacagtgacgaagatgatgacgacaacaaggttattgtga(TGG)5	144	-	ATGAGGAGGAAGAGGGAGGA	CACCATCTCCGACCACTTTT
chr1	14031851	14032203	c	(A)10tttccaaatgttaagtttagtttcaa(T)17	53	-	TTGGTCAAGTTTCAACGAAAAA	TCCCAACGTTTCGAAATAGG
chr1	14054024	14054431	c	(T)10ggaagttctactctacctactcggagtgaaagagtaataaactaagctttgagggaacaaacgggggattaacctcgcatttgaa(T)13	108	-	TGGATTTTATGAAGGGCTGG	TGATGCCTGGTCAATTTCAA
chr1	14059446	14059807	c	(T)11gaaaaatcttgttcttatggaaaacactttttctggaaa(AT)6	62	-	TGACCCCATCAAAGGTAGATT	TTCAGGTTTCAACCCATTTTT
chr1	14143825	14144223	c	(AG)6(GA)12tatgaagagagatggagagagatgaaagagatatcctcttcaagtctctcccc(T)10	99	-	CCCAAGTTTCAGCCACTTCT	AGGGGAGAGACTTGAAGAGGA
chr1	14159616	14160006	c	(AG)7atctcccttaacaatttagccacctctttcttatatcagccacgtatttggagcagccac(T)17	91	-	ATCAGCCACGTATTTGGAGC	TAGAGGGGACGTTGTTGAGG
chr1	14170354	14170774	c	(A)13catctttctaagttcttgcatgaactggatcttctttgctgagttcttgttttctgttttgtgcatcccatattgagaattacagaaaactcatgatc(A)10	121	-	TTTCTGTTTTGTGCATCCCA	GCGACAAATGTCGGTTCTTT
chr1	14174699	14175077	c	(A)12caattggtaatcttaaattcttgaaagaaggttcagccaccacgtttgtttcta(T)13	79	-	GAAAGAAGGTTCAGCCACCA	CTTTAATGGCGAAATCACCG
chr1	14235411	14235815	c	(T)12cgttattgaatccttgttacgaagagacaaactctaggaaagggaaaaaaacattgcgcattattgcagcaagtgataaaacg(A)10	105	-	CGCAGAACCAAATCGAAGTT	ATTCGATCTTTTCCCCTTCG
chr1	14268960	14269369	c	(TTTA)5ttaaagaacttaaagtaatacttaactgtttttaatgaaataaaggtaggaaatgagtatacatactatatggaagcaac(A)10	110	-	GGTTGAGTCGAAAGACTCGG	CCCGTTTTAAATTTCGACTTTG
chr1	14300595	14300963	c	(TA)8ttacttttctttgaaaacaattaagaaattttctt(A)18	69	-	TCCCTATCGTACATCCCAGG	ACATGACCACAATTGCATGG
chr1	14304657	14305136	c*	(ACC)5attacactaacctcgccgtcgctgtcgtcaccatcgccgtcaccgtcaccgtcactgtcgccgtcggctccgtctccgaccacct(TC)6ttttct(TC)6(TCT)5*ccatccctcacctcctctg(CCA)6	180	-	TTTTCCACCCCATTCAAAAA	GTGGTGGTGGTAGGGAAGAA
chr1	14382096	14382518	c	(A)16cgtggagctttttctccaactccttcttctccaacgaactcctctaacccacgttctctccattctcccatctctcccaccatcatctctcccca(CT)6	123	-	CAACCAATCACAACTCCACG	GGAGAGATGATGGTGGGAGA
chr1	14382969	14383387	c	(A)12cagcagctcactgtctttttttccattttatgtcttcctttcccagccttcattaccattaataccctcatcttttcagcacatctctcctc(A)15	119	-	ATGTCTTCCTTTCCCAGCCT	TGTAGCAAGAGTTGCGATGG
chr1	14398302	14398718	c	(A)11cagcagctcactgtctttttttccattctctgtcttcctttctcagccttcattaccattaataccctcatcatttcagcacatctctcctc(A)14	117	-	CCCTGTTGTTCCTCCAAAAA	TGTAGCAAGAGTTGCGATGG
chr1	14420532	14420890	c	(A)14ttaaaaaaaaatatttaacaaaaaattaaaatatt(A)10	59	-	TCGTGAATACCTTGCTCATGTT	AAGGTGTAAATCCCTCTCCCA
chr1	14428409	14428764	p2	(AT)28	56	-	TACGCGTCCCATATCACGTA	GGGTATGGTTGCATGGTAGG
chr1	14441101	14441556	c	(GTG)5gcggaggaggtgagggatggagaagaagaaaaataaga(AG)6aaggtggtcgaagacggagccgacgacaatggcgagggtggcgacggcgatgatgacgacgacaaggttagtgtaa(TGG)5	156	-	TGGTGGTGGTGGTAGGAAAT	TTTCCACCCCATTCAAAAAG
chr1	14446660	14447037	c	(T)10aaaactcatctttctccaacccgtccaacagccaatgcaatttaaaaaaaaattgc(T)12	78	-	TCATCTTTCTCCAACCCGTC	TTCTCCCTTTTGCATTGGTC
chr1	14500757	14501183	c	(A)12tctactctctctacttatctccactactctctcctaccaccttctaaaaaagaaagtaatttttctcatactccaccaaggacaaaaggattca(AAG)7	127	-	AAATACCCCTCCCCTCCTTT	TCCTTTTGTCCTTGGTGGAG
chr1	14538530	14538904	c	(T)10atatgtcatcttccccaacgcgtccatacggccgagacatataaaaaaaccaa(T)12	75	-	CAGTTTGGAGTCCGGATGAT	ACGTAGCTGCGGACATTTCT
chr1	14550561	14550921	c	(GA)16tactctccaagtctcttcc(T)10	61	-	TCGTCCACAAAAATTCAGCA	TCTCTCTCTCTCTCTCTCTCTCCA
chr1	14570748	14571099	p2	(CA)26	52	-	TCGGGAATGAAATTCCTCCT	CTGCAGTTTGTGTGCAAGTG
chr1	14593178	14593543	c	(T)18gtgtttgttttgtttatttttagtttatttgattcg(T)12	66	-	TAGGTGGTGACTCCCAAACC	ATCCTCAATAATCCCCAGCA
chr1	14597489	14597856	c	(AG)6aaatctcctccaagtctcttcc(T)14ctacacgttc(T)10	68	-	TTGGCAATAACGTTGCTGAA	AAAAGGAAGAGACTTGGAGGAGA
chr1	14598875	14599233	c	(T)16caattcttacaccttaaaaccacatgacat(C)13	59	-	CCACATTTCGATCACTTTAGGG	TGATATTGGGAAGGGTGGAA
chr1	14603491	14603870	c	(AG)7ggagagagagatctcctccaagtctcttcc(T)10cttctacacgttc(T)13	80	-	CCACTTTCAGCAACAACTCC	AAAAGGAAGAGACTTGGAGGAGA
chr1	14604972	14605418	c	(T)10aagcttctttaatagttaataatttgtttttc(A)15gaatttgtttaagttgtttaggaatagttaataataggtttctttaatttcttttagtttttttccctcttttcttctt(A)11	147	-	TCAAACATATAATTGGAGTGGCA	GGATGGTAGTTGTTGAGATGAGG
chr1	14627646	14628076	c	(T)10cttttttaaaacaaataaaaaatgttattgaagggtacatcacacacccttaaacgaaatt(TA)30	131	-	TTATTTATGGCACACCACGC	TCCATTGACAGCAAGAAGGA
chr1	14635812	14636163	c	(A)16caaaatt(A)11gacgtgtt(A)10	52	-	TTCTTGCTGTTCTTGGGTGA	GGTGGATAGCAACAAAGCGT
chr1	14671739	14672088	c	(GT)6a(TG)12c(GT)6	50	-	GTGTGTGCGTGTGTGTGTGT	AGATTGACATTGGGGCTTTG
chr1	14713441	14713932	c	(A)13ttatctgctgctgcctgcaagagacaactcaaaacttgtttc(T)11atacgttacacacaactcacacgtacgcacatcacacgtcatacatgcagccaagattctc(CT)8cataatttccaaaacaaacccagatttctttgaaaaaag(A)10	192	-	TGCAGCCAAGATTCTCCTCT	GCGAAGGTTTCAAGTTGGAG
chr1	14739130	14739551	c	(T)11aacttttattttttttattttttctttttctttttatgttttttttcagttaatttaatttttcttttagggtacatgcgtttatgtttaacaagtt(A)14	122	-	GATGGAATGATGATGGATTGG	ATGCTTCAACAGCCCTCATT
chr1	14741498	14741852	c	(A)13tgcaatacccaaaagcatctacaatcaagat(A)11	55	-	TGTCCAACCTCATCATTCCA	AGTATGGGAGCATTGCCAAG
chr1	14773239	14773589	c	(A)18ccattttctccaccatatatagc(A)10	51	-	GCAAAGGATCCATTCACCAT	ATCTGGAGAAGTTGGGGCTT
chr1	14774788	14775148	c	(CT)18aatgagacctgtgtc(T)10	61	-	TAACATCATGGCAACATCCG	AGAGAGAGAGAGGGTCGTGC
chr1	14786483	14786850	c	(AT)6ttcataaatgctaatgggttctatcaattgtcttctcagaatttt(A)11	68	-	TCAAACTCGGTAAAATGGTTGA	CCTCTCAATGACCCCAACAT
chr1	14818165	14818575	c	(T)10gtatttttagccgttcacaatttatcctcatgcggggcaggagtaatttgatgcttttgctttgattttcttttgtctccccccc(T)16	111	-	GATCTGTGTCTCCTCCCAGC	GGCCATCACGTTCATTTCTT
chr1	14827248	14827616	c	(T)13gttttatattttattttatttttttgttttttg(T)10g(T)12	69	-	AAATGGATATGGGTCGTGGA	CCAACGTTTATGGCATCCTT
chr1	14832623	14833037	c	(A)18tttacgaaaattaaggttctagtccgtttttaaagagcagaccagtacaaaagctcttcgatccgttaattaaaaacggaccct(A)13	115	-	AAAAATTTGAACCCCAAGCC	ACGGATCGAAGAGCTTTTGT
chr1	14860631	14861098	c	(ACC)6attacactaacctcgtcgtcgtcgtcattgccgtcgttaccattgccgtcgtcgttggctccatctccaaccacct(TC)6ttcttatttttcttcttctccttcttcttcatccctcacctctttcg(CCA)5	168	-	TTCATCCCTCACCTCTTTCG	GGTGACGGAGATTACGGCTA
chr1	14869617	14869991	c	(A)10gattttctaaaagaaaatgttttctaaaaaaagaagaggaagaaaaatatttttc(A)10	75	-	TAAATTCGGATTCCAACCCA	TTGGAAAACATTTCCTTTTGG
chr1	14873249	14873613	c	(A)10ttagttcattactctttcactccgagtaggtagagtagaacttgc(A)10	65	-	CACCCTGGGCAGGTAGAGTA	CCTACTCGGACGGTAGTGAAA
chr1	14883099	14883463	c	(TA)21g(AT)11	65	-	CCTGCGCATGATTTCTTATG	TTTTTCGGTTAGAATTCGGC
chr1	14885703	14886071	c	(A)10tt(A)10tccttcctagagttgtttttgagaaaaatataga(T)13	69	-	GATAATCGCCTCATTTGCGT	CCCACCCATCAAATGAAATC
chr1	14893211	14893647	c	(A)16tcatctcagtcaccacatcacacatttacttaaaaataaacaagttgtcgatagatacatcgcatctacttaaacaaaaattttacccttttttttatt(TA)11	137	-	AAGGCAATTTTACTCGGGGT	GGCGTTTTTCTTGAAGCATT
chr1	14904562	14904913	c	(A)12tgtataaaatcgtttgg(T)23	52	-	TTGCAATTGACCAATGAAGC	GGGTCACTTTTGACAATCCG
chr1	14931702	14932081	c	(A)10gcaagcctactaggttgaaaacctgaaaaggcgacctaggaaaaatcaaggcatcttcag(A)10	80	-	CCCGCTAAGTTGAAAACTCG	GGTTGGATCTTCCCTTCCAT
chr1	14976203	14976562	c	(A)10ttaacagaatacccctataatatataattacattaa(AT)7	60	-	ACCTGCATAGTACGCAATGTT	TTTTTAAAAGGGGATGCTGC
chr1	14977608	14977959	p2	(AT)26	52	-	TGCACTAACGTGTGTTCCGT	TTTTGGCGTTTGTGAACTTG
chr1	14984476	14984861	p2	(TA)43	86	-	TTTGTGATTGTCTGAAATGGCT	GTGGGTCCATACCGTGTTCT
chr1	14985407	14985864	c	(AT)28aatcatgccctagtattttctaagggtatttttttttactttcaatagtg(AT)26	158	-	GTGCCATGTGGAACCTGAAT	CTTGGCAAACTTTAGGGCTG
chr1	14987374	14987756	c	(A)10gagagatctcta(TC)6ttgctctatctcgattaggg(T)29	83	-	GAAACTTGGGGAACTAGGGG	AACGAATACAAGCAGCAACG
chr1	14990710	14991190	c	(T)11aagaaggggggctggtgtgtattaaa(T)14gtgttgttaagggacagcaaagtttaacaaaaataagggactagtggt(A)17ttttgtgttgttaaggagcaacaatgattaacaagaataaggggctggtggtg(A)12	181	-	AAGAATAAGGGGCTGGTGGT	GGGAAACGTTGATGTCTCCTT
chr1	14991012	14991374	c	(TC)6tatcctttctctccctctcaatagaaatcgataaaaaaagc(A)10	63	-	GGAGACATCAACGTTTCCCT	CCGATCGACCTCTATTGGAA
chr1	14992112	14992520	c	(T)12gaaaggggttttttttcagttgtaattgttgctggcagcaacataaagatttatttttggcagctctaatgatattaaaagagagaa(T)10	109	-	TGATTCCAAAGGTGCAGTTG	GCTGCCAGCAACAATTACAA
chr1	15011665	15012016	c	(AT)10ttta(AT)7tt(TA)6	52	-	GCACAGTTGCATGGTAGGAA	TCCCTTCAAGCATTCACAGA
chr1	15043186	15043552	c	(T)10gagaaattctactctacctgctcggggtgaaagagtaatgaacta(T)12	67	-	TCGGGGTGAAAGAGTAATGAA	CACCCCGAGCAGGTAGAGTA
chr1	15059410	15059779	c	(T)10gggagtttttactctacctgttaggggttgaaaaagtaatgaactaa(T)13	70	-	TCGGAGGGAAAGAGTAATGAA	CACCCTGGGCAGGTAGAGTA
chr1	15059737	15060104	c	(T)11gggaagttctactctacctgctcgcggtgaaagagtaatgaactaa(T)11	68	-	GCTCGCGGTGAAAGAGTAAT	GGCAGGTAAAGTAGGACTCCC
chr1	15084213	15084632	c	(CAA)5cacacaacagcaacacccaacagcaacaacaatacaacagcaacactcaacagcaacatcaacacacaacagcaacacccaacagcaccagcaca(T)10	120	-	ACACCCAACAGCAACAACAA	GTTGGCAGCAACAACAAAAA
chr1	15128438	15128855	c	(A)22tttaaacaagaaaaaacacgccagcaacccctaaaataaattaccaattgatgttgctagcagcatgtctcttatgcaaaac(A)14	118	-	CGACATGTCCCTTTATGCAA	TGAAGGTGGAATGATGGTTG
chr1	15133007	15133458	c	(TTA)14tcataattattgttattattttttaaatagagaagacattgcaccctcatcaatcatgaacaaatttaactcaagtgaatattcaatctttaagaaggta(T)10	152	-	CATTGCACCCTCATCAATCA	AACCGAGTAGAGCGGGAGAT
chr1	15169901	15170383	c	(A)12cacaaaaaaatccgatttttactttatttctccgattatgtcattttaagcatgcgtatcatcaaacaaatg(A)10tttcttttttggcccaagccaaaaaccagaggcaatgtgcctcaaaatgtgtataaaaaaataaaaaat(A)20	183	-	ACTCCACCCTCGTGTCAACT	ACATTGCCTCTGGTTTTTGG
chr1	15170394	15170771	c	(A)10taaaaaaaaatttttaattaaataaaaaaaattaattaaat(A)14(T)13	78	-	CCAAAAACCAGAGGCAATGT	TGATCAATCAAAAAGTGGCG
chr1	15200778	15201214	c	(TC)8tatctt(A)16gaaaaaaaacgattttttttgctgcctccattaaaaaaaccaacacatctttttcttc(A)11ctgcacaccttccttctccg(A)10	137	-	CCCTCCACGTTAGGAAACAA	TTTCGGAGAAGGAAGGTGTG
chr1	15201187	15201606	c	(T)12gccattgaatctttactgcccaacctctcctagccataaccttgcttccctaactctctacttcattgcaatttctctctcttttttttcttcccc(AT)6	120	-	AGCCATAACCTTGCTTCCCT	GGCAAAGTAGGGGTGTTGAG
chr1	15210364	15210873	c	(AAT)5ccttttgtgtttattcattgcacgcaccccatcacaaacctatgcaacaaaaactctggttctacttctctctgtctttctctcc(AT)9ctccttttgagttttgtgaaatattgaattaatggagaatatgttttagattatttttcaagttatcttagttacttg(TA)7	210	-	GCCACTGTGGGCAATTCTAT	ATAGGTTTGTGATGGGGTGC
chr1	15214024	15214424	c	(A)12gtaaggggttctgttattccacattcgcatta(T)10cttttttaatattaacgttaa(T)26	101	-	AATTTGGGCCTTATGTTTTGG	TAGCCTAATCCTCGATGGGA
chr1	15214596	15214978	c	(AT)6agtgctcgaacgaatttccgtacgaaagcatgcataggttagtaatcaacaatca(AT)8	83	-	TCCACGTCAGCCATTTATGA	TCGTTCGAGCACGATCTTTA
chr1	15215612	15216013	c	(A)10tggttttaaaatcaaataaactttgatttttgaaaaaaaaattatgaaaattttgaataatacatagggttttagt(GA)8	102	-	CCGATAATATCCGATTCGATAAA	GGCGAGCATCAGGTAGTTTC
chr1	15229831	15230211	c	(A)27ccctaatcgagatagagca(AG)6atagagatctctc(T)10	81	-	AACGAATACAAGCAGCAACG	GAAACTTGGGGAACTAGGGG
chr1	15231730	15232207	c	(TA)14t(TA)7atatcactattgaaagt(A)10tacccttagaaaatactagggcatgat(TA)12t(TA)16tcactattgaaagt(A)10	178	-	AGGTTCCACATAGCACAGCA	CCAAGCTGCTTCTTGGAATC
chr1	15232736	15233117	p2	(TA)41	82	-	GTGGGTCCATACCGTGTTCT	TTTGTGATTGTCTGAAATGGCT
chr1	15239643	15239994	c	(TA)17(AT)9	52	-	TTTTGGCGTTTGTGAACTTG	TGCACTAACGTGTGTTCCGT
chr1	15295451	15295832	c	(T)10gacagggcagtcggaagcactcaaagttgatcaaaacagttcaaggggctgaggaagattt(A)11	82	-	AAAACAGTTCAAGGGGCTGA	TAGAATATTGACGGGTGGGG
chr1	15296646	15297121	c	(A)15ttaatttgacaagtgatacataaatacttctaaaaacaaccaaataatgactaacaatcattaa(AT)12(TA)13(AT)12a(AT)11	176	-	TTAGTTTTGGGAAGGCTTTGAA	AACTGTTGAAGGATCGGTGC
chr1	15301097	15301480	c	(TC)6tttctaacctacatctcctttattttttttatgggtcttaaagatctaaggcttttagag(TA)6	84	-	TCCCTCATAGGCTGACCACT	GTTGATTTAGGGGACGGGAT
chr1	15302914	15303280	c	(T)13aattgaaagggatttgagactaggtgattctttgtccccttatc(T)10	67	-	AGGTGATCTCAACCCTTTGG	AAACCATGAATTTTGGGTGC
chr1	15321440	15321811	c	(AC)13(AT)23	72	-	ATCCCTTCAGGCATTCACAG	CAGGTGGCCATAGTTGCATA
chr1	15327082	15327523	c	(A)10gcaaaaaaattatataaag(A)12ggtgatttttgggttactgttgtgctgttcgttgacaacaagtaaaaaaaatgaaaataaagatgataaagaaaaaaattgatttg(T)15	142	-	TGTTGTGCTGTTCGTTGACA	TGGAGAAGAAGGCAGGAAGA
chr1	15363920	15364339	c	(A)11tcaaataaaaatcaaaaaaatcaaaaacccaaaaagtcagaaaaatcaaaataaaaaaaaataaaaaaaaac(A)10tttaataataaa(AAT)5	120	-	GAACTATCCGTGCCTCAAGC	GCTCGTGTGAGACCTTGGAT
chr1	15365912	15366337	c	(A)10gggctcactctctctactccttcttactaatctctcataacaattct(A)14gtttcactatcaattcaccaaggattcaagagaagtc(GAA)6	126	-	TAGACTCCCCCTCCCTTCTC	CTTTAGCCTTGGGGTCCAAT
chr1	15394887	15395340	c	(ACA)7tgcaacagcaacacc(CAA)5cacacaacaggaacacccaacagcaccagcacaattttttttgttattgctgccaacaacacacaacagcaca(T)10agaagaaagg(A)10	154	-	CAGCAACACCCAACAACAAC	GTGCCGATTTGTTCCTTGAT
chr1	15396202	15396567	c	(AG)13gggggaacctgttgcaagtcgcagccgt(AG)6	66	-	AGTCGCAGCCGTAGAGAGAG	CGGCTAAAAGCCTAAAACCC
chr1	15437056	15437411	c	(T)10aataaaaaaaataaaaataaaataaaaaataat(A)13	56	-	CCTCTTACCCCACATCCTCA	TGGAGTGGAAAGTGATGGAG
chr1	15437454	15437860	c	(TC)8tatcttaaaaaaagagataag(A)10g(T)10actgcctccattaaaaaacgaacacatctttttcttc(A)12	107	-	TTTTTCACCCCTCAGCATTC	TTTCGGAGAAGGAAGGTGTG
chr1	15437685	15438165	c	(T)10cttggctgctagaggagaaaaagaaaaataagcaaccatttttcaaagagacaaaaacattttcttttgttgccatataaaag(A)10cttgctatagatctctctccattctcatctccttcatagctgctgcatattttttatctccatcaaca(T)10	181	-	CACACCTTCCTTCTCCGAAA	TGCAGCAGCTATGAAGGAGA
chr1	15456223	15456765	c	(TC)8tatctt(A)11gaaaagaaaaaaaaacatttttttttgctgcctccattaaaaaaaccagcacatctttttcttc(A)11ctacacaccttccttctccg(A)10taggaacttcatctccctcatctctctgatttctctctctcattttttatggtacaactaccataaaacagcaaacattaagaaaaacagagacg(T)10	243	-	CCCTCCACGTTAGGAAACAA	TTTCGGAGAAGGAAGGTGTG
chr1	15456624	15457043	c	(T)11gttaccattgaatctttactgcccaacctctcctagccataaccttgcttccctaactctctacttcattgcaatttctctcttttttttcttcccc(AT)6	120	-	AGCCATAACCTTGCTTCCCT	GGTGGGAAAAGTAGGGGTGT
chr1	15465789	15466203	c	(AAT)5ccttttgtgtttattcattgcacgcaccccatcacaacctatgcaacaaaaactctggttctacttctctgtctttctctcc(AT)9	115	-	CCTAGGTGAGTTGGGCCATA	GGGGGTAACGATTAGCCATT
chr1	15469440	15469838	c	(A)10gtaaggggttctgttattccacattcgcatta(T)10cttttttaatattaacgttaa(T)26	99	-	AATTTGGGCCTTATGTTTTGG	TAGCCTAATCCTCGATGGGA
chr1	15470009	15470391	c	(AT)6agtgctcgaacgaatttccgtacgaaagcatgcataggttagtaatcaacaatca(AT)8	83	-	TCCACGTCAGCCATTTATGA	TCGTTCGAGCACGATCTTTA
chr1	15474352	15474701	p2	(AT)25	50	-	TGGTAAAACTTAGGGTGCCG	CAAAAAGTTTGCCAATCCGT
chr1	15489173	15489538	c	(T)13cattttttttccgcactgtttggacgagtggggaagatgagag(A)10	66	-	AAAAATGAACCGTTTGCGAG	TACCGAATTCGTCCCACATT
chr1	15524183	15524556	c	(A)16ggaagatctcta(TC)6ttgctctctctcgattaggg(T)14	74	-	GAAACTTGGGGAACTAGGGG	AACGAATACAAGCAGCAACG
chr1	15544356	15544709	c	(T)10aatcgaattctgttttattaaacaaaacc(A)15	54	-	AGGGATTTCAGCAACTCAGC	CTCATCCCAATGTCCTCGAT
chr1	15577897	15578250	c	(AT)7a(AT)7a(AT)12	54	-	GCCCCAATGATCGATATCAC	GATCCCAGAGACTCAGAGCG
chr1	15584028	15584398	c	(CT)6tcgaaaccctagatctgccatagttgcagagagcttcga(ATCG)5	71	-	AGGCTTTTCTTTTTCGGTCC	GGCTCTCACTTTTCCTGGTG
chr1	15623968	15624407	c	(CT)11gcagctgcgacttgcggctacatcctgatcagcgacttgaggctgcgacctgctgctgtgaccttcggctacgacttgcgagtctacgacaggttc(CT)11	140	-	CATCCTGATCAGCGACTTGA	GCAACTTGGTTCGGGTTAGA
chr1	15634727	15635179	c	(T)13gttgctatttttaaattatatactaatcagacttttttgttttcttc(CT)8tcttctattttttgttattgctagcatgaaaaataattagattacaataaacaaatttga(T)17	153	-	GCACCTTAGACCAAGAGGCA	GCATGCCTAGCAACAACAAA
chr1	15675681	15676099	c	(T)13aatgttttttttcttctttcttctctcttaaaatctcaagaacacttgaacttatagaaagaaaccaaaagaaaaaaataaaaaataaaat(A)15	119	-	TTTCGTTCTACCCCAAATCG	CCGGGGAAAGGTAAAGGTAG
chr1	15742412	15742872	c	(A)10tcacatactcatcatctcttctttactccttcaacc(A)14gagttgtatttgcttaaaatactaaggactcaagaagactcaaagaagaagaagaaaagaagaaagaagatacaaggtgggttcaaggcaa(C)10	161	-	CTATCACCCCTCTCCCCTTC	TTTTCGGCTTGATCATAGGG
chr1	15776074	15776538	c	(GTG)5gaggaggtgagggatggagaagaagaaaaagaaga(AG)6aaggtggtcggagacggaaccaaaggcgacggcgatggtgacgacggcgatgacgacgactacaaggttagtgtaa(TGG)9	165	-	GTGGTGGTGGTAGGGAAGAA	TTTTCCACCCCATTCAAAAA
chr1	15854151	15854557	c	(TC)9ttgtttctacttcttaagaagctatgccacatttctcagtctctctcctcctttatcttattctcgttcctctttcta(T)11	107	-	CCCAGACTCCAATGAAAAGG	GAAAGTAAAGGGGGATGGGA
chr1	15878245	15878653	c	(T)10ctttcttttccttcttgttatttttccttggttggccatctcggcctgccccttgtattgcttttctttccattattaattggactata(T)10	109	-	TGCCCCTTGTATTGCTTTTC	GCCTCAAAAAGTGCTTCCAA
chr1	15880102	15880518	c	(TA)9atttgataccaattacatccttcatacttttccacactatttttataaaattggtgtaactttcaatatacagatcccaattttatt(A)12	117	-	TCATTGCTAGATCTCTCCACCA	AGCGGATCCCCTTGATCTTA
chr1	15889579	15889970	c	(T)11cttttttggctgccaggcaacagcaagtgctgtttaggaggctgtagcaacaaaagttgcta(T)19	92	-	GCAAGTGCTGTTTAGGAGGC	TAGGCCTCAAACAGTGGTCC
chr1	15902660	15903029	c	(TA)7atatatatata(AT)9a(AT)13	70	-	TCTGAACGATAACATTCAATTCG	TCAATGAAGTTGTTTTGTTTGAAGA
chr1	15905520	15905959	c	(A)11ggcagccacgtttttt(A)10ttttaatgtgctgccaaggggcaaccacgttt(A)13ggggggggttttaatgtactgccaagggcagcaatatatttttttt(A)12	140	-	TGCCCTTTGGCATTACATTT	AAAACGTTGCTGTCCCCTTA
chr1	15906573	15907030	c	(A)14tgatccaatactacttgtttatggcggatgaaattctgaggattttaaaaagaatatttc(A)10tttcttaaaaattaattttcattttgaaatttgattaaaaatttgacttcatagccgctcattt(A)10	158	-	ATGGCGGATGAAATTCTGAG	GGTCATTAGGCCACGTGATT
chr1	15917216	15917585	c	(AT)8(TA)27	70	-	GGGTTGATTTTTGGTGAGGA	ATATGGGTCCCGTTCAACAC
chr1	15926949	15927345	c	(AAT)6aaaaaggagtttcttaaaagaataaaaaaatcaatttgtttaatttgtttatttataggcttctttaa(T)11	97	-	GCAAACAAAGAAATTGGTGTGA	TTTTGGATGGCCCAAAATAA
chr1	15954963	15955329	c	(T)11ggaaacgtgtttgatgtgttatttaataacg(T)11(A)14	67	-	TCGACCCGTTTTTGGATAAC	GACAGCATGTCGTGCTCACT
chr1	15990742	15991121	c	(AT)27(TA)13	80	-	GGGTAGCCATAGTTGCATGG	TGGTGGTCCCTACCGTACAT
chr1	15996331	15996750	c	(T)10catttttattttattttcttttttcttttggtttctttctataagttcaagtgttcttgagattttaagagagaagaaagaag(A)10cattg(A)12	120	-	CCGGGGAAAGGTAAAGGTAG	TCGATAATCGGAGATCGGAG
chr1	16020636	16021043	c	(T)10gactttttatattgacacacccaaattttaattcttaaacctcaatggttgaaaaaaata(AT)11aacg(A)12	108	-	TCGAGAACGATCTGAAAGGG	CTCCTCCTTCACGTTTCCAA
chr1	16065142	16065531	c	(A)12(TA)39	90	-	CGTGATGAGGAGAGAATTCCA	CTGCCCCTTCTTTCTTCCAT
chr1	16065967	16066486	c	(A)19ccaattgaataaaggagaccttgatccaggttcgagtcaaactcggtcaagtcaagtttgctgagttacaagcctgtattgtacttcatgagtcggttt(A)10ccaaataaaatgaggtgtgcatctgtcctttagcagccaaataaaaaaacagcaaaggtgtgtgctgttaagcaacatcaag(A)10	220	-	GCATCTGTCCTTTAGCAGCC	AATTTCGTCCTCCATGCAAC
chr1	16084719	16085081	c	(T)10atttttttttgtttttttgttttttttgttttgtttttttta(T)11	63	-	TCCAATATTGAAACAGGCACA	AAAAGGGTTCATCGCTCCTT
chr1	16132946	16133379	c	(TA)10catcccagaatagtatatcacttcagatgatatgacagactatcctttcaagtattcacaagccttttaacaattcacaaaataac(TA)14	134	-	TCCTTTCAAGTATTCACAAGCC	TGGCGTAGAGGCTCAGAGTT
chr1	16135869	16136222	p2	(AT)27	54	-	TGAGCTTTGTGGTCCCTACC	ATTTATTTTAGGCCGGGTGG
chr1	16144196	16144567	c	(TTC)5tttcaacttctcttgaatccttggtgagttgagagtgaaacttttc(T)11	72	-	AAAGAGAGAGAGGGGAGGGG	CCTCCTTCCAAAAGGGGTTA
chr1	16152151	16152564	c	(T)15gatttttaatgatttttatttgatttttgatttttaatgatttttatttgatttttga(T)10atttgatttttgattttctcc(T)10	114	-	GCTTGAGACACGGTTGGAAT	CACCAACACGGATGAAGAGA
chr1	16201265	16201641	c	(T)10aatttggttgtaccttgtgaagaagatcgattgacaaaaatccatttcacatag(T)13	77	-	CCCATGAGGATGCTTTCAAT	CGTGCACGAAACATGGATAA
chr1	16227443	16227806	c	(AT)7tttccagaaaaagtgttttccataagaacaagatttttc(A)11	64	-	CGGGTTTCAACCCATTTTTA	ATTTCAGTGTCACCCCCTTG
chr1	16262351	16262704	c	(AG)8atgaaagaggaaggagagatagagaa(AG)6	54	-	CAACGGTTGGGATTTGGTAG	GGTGTGCCGTTAGCAAAAAT
chr1	16294128	16294532	c	(TC)6ttgacagagaacccaacccttcgtctcgacagaacgactgaaaaccatctctcttctctctcgatcgactaaa(CT)10	105	-	CGTCTCGACAGAACGACTGA	TCTCTCCATGGCTATCCCAC
chr1	16299771	16300168	c	(T)14catatttgttgaaggtcatgcaacaggagcgctccttttcgaaaatttgttctgccaatcacactcccactt(A)12	98	-	CCGTTATCAACAGGTATGCTTC	GGAGTGTGATTGGCAGAACA
chr1	16307812	16308225	c	(TC)6tgtgacctgctgccagtagctgccagtggatgccaccggcttgtctctctctcgtttctacgacctattgccaactcttaccattactca(TC)6	114	-	CCTCATCCGTCTCTCTCGTC	GCTGGAGGTCACAGTCACAA
chr1	16308374	16308783	c	(A)14tttcttttcaaaaaattaacatattatcaagaaaattattaacttagttataatttgttatattaaagatacaaattaatgattt(A)11	110	-	TTAGTTCGGTTCCGATTCTTG	CTTGAGAACCAAAATCGATGG
chr1	16414423	16414797	c	(T)10atttttttcgagatttttttattga(T)11gaatttttttattga(T)14	75	-	CTCGTGTGAGGTCTCGGATT	GCTTGCACCATTGAGAATCA
chr1	16415893	16416262	c	(T)32gtttttttg(T)29	70	-	TTAGAGTCATCCCCAGTGCC	GCAAAAAGGGGACAAACAAA
chr1	16416734	16417154	c	(T)12gtattttagccgttcacagtttatcctcatgcgggccaggagtactttgactttttgattttcttttcttttgtctcttttcttttcgg(T)20	121	-	ATAACGTTGACTTGCCCCAG	ATGACGAAAGGCCATCTTTG
chr1	16426887	16427247	c	(A)16ccgcacttgcgtggtgtgctgttagcaaaaaaaag(T)10	61	-	ACTTGCGTGGTGTGCTGTTA	TAGTCGACCAAGCGAAACCT
chr1	16455302	16455691	c	(GA)7agtgactgggcgttgggcaacaatggggaaggagaatgttacaggtttaatgaaagaatttcttc(T)11	90	-	GAGAGAGAAGTGACTGGGCG	CCCATCTCTCCCTTCTTTCC
chr1	16476340	16476825	c	(A)10cctttttttctattttcatttcttttaggtgtgtgttaacctatccgttgacaac(A)12caaaaaaatgattttgggcgcgttgttggcaacagcaacaacttaagtggtgtgtctcgagtaaaagtttttttt(A)10cccttgatgttgg(T)11	186	-	CGTGTATGGATCTGCCCTTT	GTTTGTTGAAGACGATGGGG
chr1	16570369	16570756	c	(A)19ccaattttcactttatttcccgattatgtcttttaagcatgtatatcaccaaacaaatg(A)10	88	-	CCAATTTTCACTTTATTTCCCG	ACATTGCCTCTGGTTTTTGG
chr1	16570878	16571233	c	(A)12ttaattaaatt(A)20(T)13	56	-	CGTTGACGTCTCTTGTCTCG	ACATTGCCTCTGGTTTTTGG
chr1	16619708	16620100	c	(T)11cttttggtttctttctataagttcaagtgttcttgagattttaagagagaagaaagaagaaaaaaaacatt(A)11	93	-	TTTCACCCTTGACAGCAGAA	CCGCTATCTTGCTGACTTTG
chr1	16645688	16646096	c	(AT)8ccatgaaacatggaaggctgtggtgttggattgaaaacgtggtaatctatctgtaagagttaaaatcttattaaggaaagtg(T)11	109	-	TCATAGTGACCATCCTCGCA	ACCACAGCCTTCCATGTTTC
chr1	16652048	16652637	c	(TC)8ttgattattattattttttaattgaattttttttaaaaagggctattgaatggttatttttctctctttctctctcttgattttttaaattaaaatcaa(T)11aaaaatggccattgaatggtcggttttttctctcttgattatttaaaaaaaaacaaattt(A)10tattgacctaattttggtggacaaataaccaacaccataatgcactaaatttgtacataaaaaagagattcagtttgg(TA)8	290	-	GGTGGACAAATAACCAACACC	TTTTTCAACCATTCAAGGGC
chr1	16652735	16653138	c	(A)10tattgacctaattttggtggacaaataaccaacaccataatgcactaaatttgtacataaaaaagagattcagtttgg(TA)8	104	-	GGTGGACAAATAACCAACACC	TTTTTCAACCATTCAAGGGC
chr1	16670914	16671271	p2	(AT)29	58	-	GTATTCTTTGGGGGTGCTCA	AAGGCAATTGCATCAAAACC
chr1	16674280	16674703	c	(A)18gatttcctttgaatttgattcaggattttgaaaatgaacaattattgaattttcacaaactcccaaatttaatataaaaatttaactttgaaaa(AT)6	124	-	ATAATCCAGCATCACAGCCC	CAGGGTTGTAGCGGACAAAT
chr1	16682241	16682610	c	(T)10cttactattcatcttccccaacgcatcaaaatcagccacgttttttttt(A)11	70	-	TACCGATTTCATCCCGAGAC	CGGGTGAAAAAGGAGATGAA
chr1	16712662	16713049	c	(T)14aatacattgatttttattttttcaaacaaaaatcaaaacctttatttaaccaattgattt(A)14	88	-	TCAAAACAAAGCACAACCCA	GATTTATGGGCAGCCTTGAG
chr1	16747650	16748001	c	(TA)13(GA)13	52	-	TCTATTGCCACCCCAATTTT	CCAGCTGGGATATCAAGTACAA
chr1	16751547	16751898	c	(TA)10(AT)8(TA)8	52	-	TCGCAATGTGAGTCCCAATA	ATTGCCTCACCCAGAAAACA
chr1	16754154	16754513	c	(AT)18(TA)12	60	-	GGCAAGATGAGGATGGCTAA	CCCTCAAATTTATTCAAAGCCA
chr1	16756959	16757311	c	(A)16caatagggagttcaatttc(A)18	53	-	TGAAAGCCACAGAATAGGGG	CAGTCCCCATTTCTCCTCAA
chr1	16757357	16757760	c	(AG)10ttgggcaaagagagaaggtcagagagagctggagagggagagcaggtcattagagatagaggagagtcttcc(T)12	104	-	TCAGAGAGAGCTGGAGAGGG	CTGATCTCCTCCCTTTTCCC
chr1	16788167	16788549	c*	(TTC)5(TC)19*(TA)16	83	-	CCACCCTATTTTCCATGTGC	TGTCCTCCAAACGTAACCCT
chr1	16791731	16792173	c	(AC)6gctcaatttttgtttttgtttttttatttcttcgcaaa(T)14cttaaagtcttatttaaacttaaaaacaaacaagcaaaattgacattaggttctgtatcattttaact(A)11	143	-	ACGTTTTCTTGGTCATTCCG	TGGTTGTAGTCAATGAAATGCC
chr1	16794703	16795182	c	(A)13tttatgtaccccaagccgaaaaacacaggctatgtgcctcaaaatct(A)12ttcgacgaaaattaaggttctggtccgtttttaaagaacggaccagtacaaaagcactttggtccgctcattaaaaacggacc(A)13(T)12	180	-	CCCACGAAGGCAAGTTGTAT	TCCGTTTTTAATGAGCGGAC
chr1	16828562	16828939	c	(CT)6cggatctatcttctcaaatcaactctaagttttgatctaacgtt(TC)11	78	-	TCGAATCTCTCTCTCGGATCA	TTGCGTCTTCAAAATCACAGA
chr1	16851018	16851432	c	(A)12tccttgtaatg(A)13ttattaccaagagaatagaaatgtgcattatcattaatgcctcaagtgtcagatatgcaatgttaatgt(A)10	115	-	TTTGGGTACGTAGGCATCTTG	AGAAACAACCCACTGCACCT
chr1	16857819	16858186	c	(T)16gtattttctcgattttcgatttttgatttttgaa(T)18	68	-	CTAAAGGCAGGAGGGCTACA	TGCAACAAGCTCGTTCGTAG
chr1	16863364	16863771	c	(A)10tcttttaggcttggtctaaggttttgaaatggacagtcaccaaacttaccattttaaaattaaagttaaaagttgaaagataaaca(T)12	108	-	AAGTCGATTGAGTATGCCACG	ACAATGAGCCGTCCAAAAAT
chr1	16863706	16864071	c	(TA)12tggaaaaatattttcaaagttattttcttt(TA)6	66	-	TAGGGTCCCGTTCAGTACCA	TTGGAATGAGCTGATTTTTGG
chr1	16872051	16872444	c	(T)14ggaaggtaggatctaagatatcaaccgtgttaaacatcaatcatactactgtggtcttacttggcacc(T)12	94	-	AAATTCAATACACGCACGCA	AGTTGTCCATTCAAGGTGCC
chr1	16875465	16875882	c	(A)10cggaaataaattctcggaaaattctagctaagctttagaagagaagctatttgcagaaaaaatgtggaatttcttgcttctacacttgaa(T)18	118	-	TCCAAAAATTCAAGCTAAGCA	TCCGAGAATTTATTTCCGTTTT
chr1	16892385	16892742	p2	(TA)29	58	-	GGAGCACGTTTGCTCTTTGT	GGTTGTTTGTGTGTTGGCAG
chr1	16907820	16908311	c	(AT)11(AG)26aaatacctgttagaagggaagatttccttcattaacatcgaaaccctagatgtagaggagatgaaacgaacttgat(AC)21	192	-	GGGAGAAAGGTTTTTCGTGA	AGCAACGGCCAAAATAAGTG
chr1	16951949	16952364	c	(T)10ggaagttctactctacctactcgaagtgaaagagtaatgaactaattttttgggagtcctactctacctgcccagggtgaaagagtaatgaactaa(T)10	116	-	TGCCCAGGGTGAAAGAGTAA	CCTGGGCAGGTAGAGTAGGA
chr1	16977432	16977800	c	(A)12tcaaataaaaatcaaaaagatc(A)10tcaaaaaac(A)16	69	-	CCTCAAGCATGGATCAGTCA	CTCGTGTGAGACCTCGGATT
chr1	17020642	17021073	c	(T)15aagattttatttcaattcatgatagatttgtatggtgaacctcttcttgttaatcttaaatttgtagataatattaataatttattatcttaaaggata(AG)9	132	-	TTCCCTATAATGGCCCTCAA	CGTCTTTGTGAGATATTGCTCATT
chr1	17071023	17071418	c	(A)10gaaatatttgagatacgtaggcaacttgagaaattacttcaggctcggtcatgc(A)11tgtattctctt(A)10	96	-	CAACCTTGGGAGGGAATCTT	CATGACCGAGCCTGAAGTAA
chr1	17152039	17152438	c	(AAC)5atgtcatcaatcaactaaactttactctctttccttcttctttttcgtttcaaatagatttcttgaagtatg(T)13	100	-	CAACATCTTGAGCGGTTCAG	TGACCAAGATTCAGGCAAAT
chr1	17158587	17159002	c	(T)10ccaatttaaatatttacaacaaattgtaaacgtaccaagcaattaataattg(T)13ctttctgttgttctttctaaaattatgta(T)12	116	-	TTTGCTCCCAAAAATCTTGC	AACACAGCCCTCACATAAATCA
chr1	17167390	17167775	c	(TGA)5tctctgttcaccatccatcaatgcaagtgagatgaaacccaattctcatctttg(A)17	86	-	AGATGATGATGGTGCTGCTG	CCAAAAATGTGAGGTTGGCT
chr1	17170172	17170533	c	(TC)17(TA)14	62	-	TGGGAACAACTTTCCACACA	TGGCTCTTTCTAGGGCCTTT
chr1	17185370	17185721	c*	(TG)10(G)33*	52	-	ATTAGCAAGGATTCGCCAAA	TGGAATTGTTTTCCCTTTGC
chr1	17188722	17189100	c	(T)12aaggattgagaccaaagacaaaaatacgtattaaaa(T)18gg(A)11	79	-	TCCCTAGAGGGACAAAATGC	GCACTCACCACATCAACTGC
chr1	17198055	17198452	c	(TC)6tgtcttc(CT)10tccagacttccagatataaaacatcccaaaaccactttgaa(TC)9	98	-	AATGTTGAACGCAGTGATCG	CGCTTCAAGGATTCGAAAAG
chr1	17206033	17206384	p2	(AT)26	52	-	TGCCCATCATGCTAAGTTGA	AGTTTGATTGCCACGAGGAG
chr1	17213174	17213545	c	(T)15gaattaaaaaaccaacaatcccccacttattttaatgtac(A)17	72	-	CCCAAAAGTGGGAAAATTCA	AGTGGGGGATTGTTGGTTTT
chr1	17222804	17223175	c	(T)16gaattaaaaaccaacaatcccgcacttattttaatgtac(A)17	72	-	CCCAAAAGTGGGAAAATTCA	AATAAGTGCGGGATTGTTGG
chr1	17231818	17232185	p2	(TA)34	68	-	TAGTTTGCCCACATGGATCA	TGGTTAAGTTTTTAGTTTGAATGAGAA
chr1	17241845	17242201	c	(T)10aatttagaaaaaaaactaaaaactaaataat(A)16	57	-	CGCTTTGGACGACCCTAAAT	ATTTATAGATTGGTGCGGCG
chr1	17280567	17280917	c	(T)11caaaaattaaaaataaaaactaaaaatt(A)12	51	-	GGGTAGCACGCCTAACCATA	GATAGCCGATGTGCGATGTA
chr1	17296565	17296914	c	(TC)8(AC)17	50	-	TTCTTCGAGTTGTTCATTGGAA	TGTGTGTGTGTGTGTGTGTGA
chr1	17305516	17305986	c	(A)10gtatttttattcgtggtgtgccgttagcagaaaatgattttttatttttcatcttcttctcaaataaattatttgtgagtgatgtgctaagaaat(A)10ttatctttttaatgttgttcatgatgaggagaggattac(A)17	171	-	TGTGCCGTTAGCAGAAAATG	ACACTATTGGCACCCTACGC
chr1	17306432	17306833	c	(A)11catcaatttgtttttttttaaacatagaatttcttttctttttaaaaagaaaaaatcaattt(A)10ggggc(G)14	102	-	TGTGAAACAATATGGTGGATTGA	TCGTTTTCATATAGGTTGGTGC
chr1	17346095	17346501	c	(T)10agggtccgtttttaatgaatggactgaagagcttttgtactggtccactctttaaaaacggaccagaaccttaatttttacaaa(T)13	107	-	CCACTCTTTAAAAACGGACCA	TTTTGTACCCCAAGCCAAAA
chr1	17366408	17366793	c	(A)10ttatagtctttttggcccaacccaaaaaccaaaggcaatgtgcctaaagtttgacatacaaacttt(A)10	86	-	TAAGCCCACAAAGGCAAGTT	TCAAACACGGACCAGTACGA
chr1	17389253	17389631	c	(A)10gacgaaacaatgaattaattgattttctccattgttttagttttctaaatcaatgag(A)12	79	-	ACTTAAATGGACTTGGGCGG	TGGTGAGTTTGAGGGTAGGG
chr1	17400020	17400414	c	(A)11gctccgctctgataccaagtaagaaacccaaacctagagcaactagaagagagagaggagaagaagaagatt(AG)6	95	-	AAGCTCCGCTCTGATACCAA	GTGTTTGTGCAACAGCCCTA
chr1	17407613	17407972	c	(A)10ttctactattagttgccca(C)15accaa(T)11	60	-	AATTGCATGAGAATCAGGGG	GGGCAATAGTGGCAGATTGT
chr1	17430267	17430690	c	(A)10ttaatcaaagcagacatataaaaatatttatatcatgcattgtacacaactgattgatagaaaaaaaattaataattctgatgaatccaaataaatttat(A)14	124	-	AACATAACGGAGTGCATTTTCA	TGGGTCTCAAACAGATTCCA
chr1	17456749	17457137	c	(A)11tccaaataattaaaattaaaattaaatcaaacaaacaattaaaatcgaacaattaaaccaaatcaaaa(T)10	89	-	CCGATCCCTAGGACGATGTA	TGGTTGGGTGATTTTCGATT
chr1	17458463	17458825	c	(A)10ttttactttatgcgggtttgagtttttattgataagattaaaa(T)10	63	-	TGCTCACGTACATTGGTAGGA	CAATAAAAACTCAAACCCGCA
chr1	17472147	17472508	p2	(TA)31	62	-	GGTGAGGTGAGGGAGATGAA	TGGATTGGATTGGATTGGTT
chr1	17477817	17478207	c	(AT)21gggtcgggtttcataaacagagtgttttg(TA)10	91	-	ATCAGCAATCTCGACCATCC	TATATATGGGAGGCGTTCGG
chr1	17529059	17529475	c	(TC)6cgccctcctacctctcatctcatctcacataaactcatttctttatctcgttgtcctctcc(T)15gataagtagcattgcattc(A)10	117	-	ATCTCTCTCTCTCCGCCCTC	ATGGGATTTGTGGGCATTTA
chr1	17560235	17560628	c	(TC)6ataaatattttcaacaccaagattctttcttattcaaacttcaagaaaaagatttta(T)13g(T)11	94	-	CTTGGGAAAAAGTGAGCTGC	GAGAGAGAGATTGGCACCCC
chr1	17570884	17571286	c	(A)10tgtatatatgttgctgccacaacatgccttcaaa(T)12aaatatatgttgctgccagcaacacacaattcaaaac(T)10	103	-	CTGCCAGCAACACACAATTC	CTTTGAAGATGGAACCCTGC
chr1	17591617	17592034	c	(GA)7gggaggaaaaatttatcttgatattcgccggtcggagaatatttgccggtgggagcttgcacagccgtaacccattagctcgttct(GA)9	118	-	AGAAGATGGTGGTTATGCCG	GAGCTAATGGGTTACGGCTG
chr1	17596227	17596588	c	(AT)8ac(AT)22	62	-	ATGGGGAAATGATGAGGACA	TCTCATATGGCCCTTGAACC
chr1	17623838	17624210	c	(A)10tgtccaagaaaaaagttgtcaggactgatgtaagggacaaaatgagc(A)16	73	-	CACATTGGGTTGGGATCAAT	TCCGCTCATTAAAAACGGAC
chr1	17641031	17641475	c	(A)10tgctaaaagaaattttttttatttttctctttgtttcaaaatttttcattttaaacaatattcgatttttcttt(A)10caattttttaaagctaaattcagtttttctttatttct(A)13	145	-	AGGGTACATGTGTTGATCTTTGA	ACAACACACAACGGCAACAT
chr1	17745595	17746010	c	(A)10gtttcactctcaactcactaaggactcaagagaatttaaaaagaagaagaaaagaggatcaaggatacaaggtgggtgcaacaaatactccccc(CT)6	116	-	ACCCCTTCTCTCCTTCCAAA	TTTGTTGCACCCACCTTGTA
chr1	17774235	17774606	p2	(AT)36	72	-	TTAGGTCGGGTGACCACAAT	GACGCACTATTCTTTCAGGCA
chr1	17781025	17781374	p2	(AT)25	50	-	CCACAATTGCATGGTAGGAA	ATCCCTTCAGGCATTCACAG
chr1	17812944	17813590	c	(A)10catttaaaaaaaaatcaaaatttttttaaaaaaaatgttaaaaagcaaaagaaaacgtttttaaaaaaaacgttttttaaaaaaagaagaaaacc(T)10aaattttaaaaaaaagtatt(A)10cgtttaaaaaaaatcaaaaaatt(A)16ccgttaaaaagaaaaagaaaacgtttttaaaaaattaaaaaaacaacttt(A)10cgttaaa(T)16aagtttaaaaagttttaaaaaaatgttataaaaaaacattttaaaaaaaacgttaaaaaacaaaatt(A)13	347	-	TGGTCCCAATTAAAGGGTTG	TCTCATCAATCGTATGCCCA
chr1	17813424	17813887	c	(A)10gttt(A)10cgtttaaaaaataaataaataaataattt(A)10cgtaaaaaaaatatatttttaaaaaaaatttaaaaaaaaagtttatttgtttcaaaattttttattttaaacaatattcggtttttctctt(A)10	164	-	TTTTAAACAATATTCGGTTTTTCTC	TGGGTGACCCTAACTGAATTG
chr1	17859359	17859750	c	(A)11tgtataaaaaaatatagttgagttcataaataattaatgtcaagtttgttaataaattatcgagttcaat(A)11	92	-	TCAAAGGACCTAGTGGAAGGA	GGGATAAGGTTGAAGGACCA
chr1	17948396	17948801	c	(CT)7aactcgttctaaagaaaccctaaattcgatttctctcaaaggtaagaaatgacaaacccttaattagtttttattatttaa(T)11	106	-	TGACGACAACGTCGACAAAT	CCAAACTAAGCCAAAACCCA
chr1	17954636	17955118	c	(A)10caaatgaaataaaaaaaaattttaaaaaataattaagggtttaccttagggtttctttggagagaa(AG)6aaaaagatgaggacgaagccgcgaccttcgtcggcgccgtcgcaaacaaaggggaaggaagaagatcgtcgttagcagacgaagt(A)10	183	-	TGCATCTTCATTTTTGGGTG	CGAAAAACAGATCTGCGTCA
chr1	17974023	17974417	c	(AT)24agtagcctagtacgtcttctctttc(AT)11	95	-	AGGGAAATTTTGGTAAGCGG	CCCACCCAAAAGATGAAAGA
chr1	17988135	17988541	c	(A)15gatcaatctaactaataataatttgtttattccagtgaataaatattacgagtaatttacaagtctttctacgagtgatt(TA)6	107	-	CACGTTTGAAAACGCATGTAA	CGGAATGAGCAGATTTTTGG
chr1	18049857	18050245	c	(T)17catttatttcttcttttcttccctcgtgtcttacacggcaatgagccgaagcatttccactc(T)10	89	-	TGTCTTACACGGCAATGAGC	ACCCAGTGGTGAAATGCTTC
chr1	18061946	18062336	c	(TA)11tttctgacttttttcatttaccttagtctgtgattatactctatttttaggcatt(TA)7	91	-	ACATAGCGACCACCAAATCG	AGTCAGAAATGAAACAAGGGGA
chr1	18087004	18087366	c	(AG)6attgtgatcaatcgatgaagaagtcgatt(GA)11	63	-	TGGGAGATGCGATCTATCAAG	TCGATCGACCTCTCCATCTC
chr1	18101789	18102168	c	(ATAC)5(AT)17gtttcattataa(T)14	80	-	GTGCAGCTATTGCAGCTTTG	GTTTGCACATGCCACCTACT
chr1	18115586	18115941	p2	(AT)28	56	-	GATCAAGCTCTCAGTTTTGAGGA	TGTTCTTCGATGGAAACGTG
chr1	18154875	18155270	c	(TC)8atttttttttcttttcttcttctttgcatttaaaaaagtttcaataaaggttttaagctttgatcttac(T)11	96	-	AGTTCTCATTGCATCCACCC	TGTGAATGGTTTCGATTGGA
chr1	18155147	18155568	c	(A)11tcttcgagttattcgatttaaaattgtcattttggaggttttaatagtgatttttccatcttcattgatgattatatatatattaaaaaagaaataaatt(A)11	122	-	TTCGATTTAAAATTGTCATTTTGG	CGAACAAAAGACCCACTTCG
chr1	18160645	18161002	c	(TG)9(AG)20	58	-	TGAAGCCCCTTCTTTAATCAAC	CATGTATGCCACATGGACTGA
chr1	18165067	18165441	c	(A)15caaacgtgattttcatgtatatgattgcacgttttttcacactcaaag(A)12	75	-	GTTCCTTTTCCACAAGTCCG	CCGCAATAATTGTTGAAGGC
chr1	18165978	18166361	c	(T)13acgtttttaaagtaattttttagatttaacccaaacaatagttttaacttttcaatttatt(A)10	84	-	TGAGTGCAGTTTCGAGAGGA	GCTTTGGCCAGAGAAAATTG
chr1	18169259	18169634	c	(TA)7(AT)9(TA)22	76	-	GGATGATCTCTATGGCGAGG	CACCAAAAATCAGCCCATTC
chr1	18200186	18200602	c	(T)10gttgataaatagtgatatgaatgtaatttctttgatttgagtttagttcgttaagggcctatttttggagctctctgtcaactctgttgg(T)17	117	-	TGGAGAAATCTGATTGGATGC	AGAGCTCCAAAAATAGGCCC
chr1	18247564	18247983	c	(T)10atttctttctatttttaaagttcatgtaattttgttctctgcaacatcattgcatcggatcaggtttatgattgtcacgaggtgatcagattagaaag(T)12	120	-	CACCGAGCACCCAAATTTTA	GATCCGATGCAATGATGTTG
chr1	18265110	18265484	c	(AT)28a(AT)9	75	-	TTTATTTTAGGTCGCGTGGC	TCACTTCAGGTATTCACAAGCTC
chr1	18302337	18302686	c*	(C)17(A)17(AAT)6*	50	-	AATTGCCTTTATTTCGCCCT	CAAAACGCGGGTGTAAATCT
chr1	18315874	18316246	c	(A)34caatgaagaattaacttgagattataaa(T)11	73	-	TCGTGAATGACAAATGGAAAA	TGTGAAATGGATACTTGAATCAAAA
chr1	18346158	18346564	c	(A)10tattctcttaaggaaagtatcatccaaaaggaaaatcccctattaaaaggttcaaaagaagataatgtcaaactaggggcattagc(A)11	107	-	TACAGACCAACCTTGGGGAG	GGGGATTTTCCTTTTGGATG
chr1	18432639	18433006	c	(TC)20actttttaaaattcc(A)13	68	-	ACAAGGAAACGGGTTTTGTG	GCTGAGGTGTATGTGTTGCC
chr1	18441144	18441532	c	(C)23aaactgacccccaatagagaagacgatctcccttttaaatagaaagtaagtttcta(T)10	89	-	TGATGTGCTGTAGTGGAGCC	TCTATTGGGGGTCAGTTTGG
chr1	18471543	18471981	c	(AAAT)5gaaaa(T)11caccgttgaatttcgattttaagtttgggagttatgtggaacttcagtcaccatccattttcaaaacctttgatcaaactcaatttttg(T)14	139	-	ATTGCTGATGTGGTCATCCA	GCAAAGCTGGTACCTTTTGG
chr1	18515384	18515747	c	(GAA)5ggagacatcctcttttttataaaaaaaaactttctaatg(T)10	64	-	CACAAGGAGGAAAGGGATCA	TCGTGGTACGAGTAACGTGG
chr1	18533026	18533425	c	(A)11tgttaggcgtgttgttaacaacatcaacaagtaaaatattttttaaaggtggatggtgttgtgttttatttcttgaaag(A)10	100	-	CGTTTGTCCATTGGCAGTAA	ACCGACAGAACTGGATGGAG
chr1	18546318	18546711	c	(A)12gggaaaccttgtaagtttcaaaatcatttttttaccccattttcttcaacgtggacttgttctattctct(GA)6	94	-	CAAATCGAAGGATACCGAGC	CACGTTGAAGAAAATGGGGT
chr1	18558475	18558828	p2	(AT)27	54	-	GCTTTTGAATTTCCAGCGAG	TGTTTTCTCACATGGCCCTT
chr1	18565526	18565958	c	(TC)10tttctcgataaaatcctattttttttactatatgagctccataaccatcgtcttctctgatcaacgagcttctaaagatat(TC)9(AC)7	133	-	AGCCATCAAAGATCGGTACG	GCTCGTTGATCAGAGAAGACG
chr1	18624198	18624776	c	(TC)12(TA)17aagctaacccacatttatcccctcttcctgtaacagcttgaagctccaagttgaagatcgaacccatcgcttaaatattgagtgattgaagttaggta(AT)6taagctaacccacatttatcccctcttcctgtaacagctcgaagctccaagttgaagattgaacccatcgcttaaatattgagtgactgaagt(TA)9	279	-	CTTCCCCACTCACTCACACA	ACACTTTCGTGATTTTGGGG
chr1	18627542	18627943	c	(AT)27(TA)24	102	-	TGGTTGCATTGTCTAGGGTG	TTTGCAAAGTAGCAATCCCAT
chr1	18633301	18633714	c	(A)15ggtgagaatgaaatctgtttaatttgtgtacttcctcctcatctttataaccaccgttcgtcgttaagaatgaaatctg(T)20	114	-	AACCACCGTTCGTCGTTAAG	ATGGGAACCACTCACTTGGA
chr1	18668371	18668784	c	(A)15ggtgagaatgaaatctgtttaatttgtgtacttcctcctcatctttataaccaccgttcgtcgttaagaatgaaatctg(T)20	114	-	AACCACCGTTCGTCGTTAAG	ATGGGAACCACTCACTTGGA
chr1	18778228	18778585	p2	(AT)29	58	-	AATTTATGTTGGCGCAGAGG	TCCAGATGATGTGACGCACT
chr1	18784313	18784672	c	(TA)7(AT)23	60	-	GGGAAATGTTCAGCACCCTA	CTGATTTTTGGGGAGGATGA
chr1	18786321	18786699	c	(AT)9a(AT)14(TA)9(T)14	79	-	TTTTTCCTACTTTGTTCTCCTTTTT	TAATCTTGATCGTAATCAGCAAGTC
chr1	18797417	18797771	c	(AT)21a(AT)6	55	-	GCACAGAGGCTCCAAGTTCT	TGACGCACTATCCCTTCAAA
chr1	18817557	18817914	c	(TA)18(AT)11	58	-	ACGTATGAGCTTGGTGGTCC	GTGGGCACAGTTGCATGATA
chr1	18836044	18836408	c	(A)10tagttcattactctttcactccgggtaggtagaatagaacttccc(A)10	65	-	TTTCACCCCGTGTAGGTAGAG	CCCGGAGTGAAAGAGTAATGA
chr1	18838715	18839074	c	(AT)14(TA)16	60	-	CCACAGTTGCATGGTAGGAA	GGTCCTTACCGTACATCCCA
chr1	18857626	18857983	p2	(AT)29	58	-	AAAAAGTTGGCCATTGAACG	TGGTAAAACTAAGGGTGGCG
chr1	18862772	18863178	c	(A)17gatttttgaaagaaaaacccctaaaacctaatcttcattgattcaaccaatcacaaaactcaaaaggaaaga(AAG)6	107	-	TTTTCATGGTGGTTTTTCCA	TCCACATCCACATGCACTTT
chr1	18863700	18864129	c	(T)15catgatatctgattgtttactctgctacccattttcatgtatttgtagaaatataccatggtttagtatttttcaattattatttttaatttatg(TATT)5	130	-	TGGAGCTTTTGATTTGATTCAT	GTGCGGAGGATGAGAACATT
chr1	18864193	18864619	c	(T)12catgatatctgattgtttactctgctacccattttcatgtatttgtagaaatataccatggtttagtatttttcaattattatttttaatttatg(TATT)5	127	-	ATTGGCCTTGAATTCGTGAG	CAACCAATGCATCATGTAAGAA
chr1	18896002	18896355	p2	(TG)27	54	-	GGTGAGGTGAGGTGGTCAGT	CACACACACATACCAGCCAA
chr1	18915136	18915526	c	(T)11ctttttttttaaatcgattttttttattttacaccccagcccctatattgttgttgacagcac(T)17	91	-	CCATATCAGCACGTTGTTGC	TGGGTTGGGGGAGTTAAAAT
chr1	18951048	18951527	c	(A)10gaaactatggctggggtttcgggccagatgcaagaagtcaaaaatatgggataaatttgcttttcttttcttttcttt(TG)9(GT)9ggggt(G)51	180	-	GTAGGGAGGTGAGAGGAGGG	TCATGCCTTGATGGAACGTA
chr1	18997186	18997619	c	(T)10aaaataaattgagcccaatcaaggaaattc(A)12caaaacaacttgagcatatgtcgccattagcaacatttaaaaaaatttgattccattattttttgaacttcc(T)10	134	-	GCCCAATCAAGGAAATTCAA	ATTGGCAGCGGCATATAATC
chr1	19011288	19011736	c	(CT)9cagcctcactctcctcacaggtcagcaaaccgtcttctagtc(CT)8tcgatctgttatgtttcttgaattccctttgcattcatctatcattaaataaacaag(CT)8	149	-	GCAACGACTTGTAACGACGA	GCTAGTGGGAGTGGGAGTGA
chr1	19032639	19033055	c	(AGA)5ggaggagactgaccttgaacttcggcgatgatgtttcaacaatcaagtttctttttctcaaatctggatttttatctcagatttggatctg(T)11	117	-	AACTTCGGCGATGATGTTTC	GCGAGATGGGAAAGAGTTTG
chr1	19036878	19037259	c	(TA)13(GA)11(AG)17	82	-	TGTTTGGCTTTCTTTAGGGC	TTGCTCTCTTCCTAGACGGC
chr1	19045629	19046016	c	(AG)6gaacctagttggacgtcgtcactggatgcatgctgttgagagattcccttattctggattttctaa(T)10	88	-	GGATGCATGCTGTTGAGAGA	AGAAGACCAAGGTCAAGGGC
chr1	19054660	19055033	c	(A)10gatgacagaaacggttaaagacaattaggtgaaagagtcaaaaatttcca(AT)7	74	-	GGTGAAAGAGTCAAAAATTTCCA	ACATGCATTCCTCCCTTGTC
chr1	19055536	19055960	c	(A)13tacaaaaaaatttattttcatcattgaattttaattttaaatttgaatgcccgataactgtccattttcaaaaccttggaccaaacttgaaaa(T)19	125	-	TCACCTTGTGGCATTCAAAA	AAATGGACAGTTATCGGGCA
chr1	19056290	19056684	c	(ATG)5atcattgtaatgagttgatactaaaagaaatt(A)13gtgagaaacaattagtcaa(AG)8	95	-	TCCGCTAACAAAGAAGGATGA	ATCTTCCTTGGCCCCTAATC
chr1	19104575	19104936	c	(ATTTTT)5ttctttttgtcttcatc(TCT)5	62	-	CCCCACATACCAAATCCTTG	ATGGCAAGAAAGAGTCCCCT
chr1	19109747	19110158	c	(A)10taatgtggaccacatgggtcatcattctccatgggatttccaatgtcacattggcatcaaaacccttctctaataggatgttttcattta(AC)6	112	-	ATGTGGCACCCTCTTATTGG	GGAAATCCCATGGAGAATGA
chr1	19110993	19111349	c	(TA)8attttaatgtggatttg(AT)12	57	-	CAGCCCTAAAGTTTGCCAAG	TGTGAGGATGATCTCTACGGTG
chr1	19118097	19118462	c	(A)10ttcagagaaattcatcatgtgcaacctttatcactattaaaattt(A)11	66	-	ACCACCACGACTGTCAATCA	CGAACTTCGATTGGTTTTTG
chr1	19145993	19146403	c	(AT)15gtatataatttaatggcattttttggatggatggattaatgactttctttaattgatggaaaaattattga(T)10	111	-	TTTTGGATGGATGGATTAATGA	GGTTCTCTGGGTTGCCAATA
chr1	19157391	19157748	c	(GA)8g(GA)10g(GA)10	58	-	CCGTTTCAGAGCACACTTGA	AGCAGCTCTCTATCCCTCCC
chr1	19159537	19159931	c	(A)21tagatgagttgattgactccccctcccaacccttctataaaggaagacatgtttgggtgatc(T)12	95	-	CATCTCGACCCCACTTTTTC	TATAGAAGGGTTGGGAGGGG
chr1	19198250	19198627	c	(AT)6agat(AG)31	78	-	ATTTCAACCGGAATCCAACA	GGAGAGGCATCAGTATCCCA
chr1	19201311	19201689	c	(T)12gcttataaataattcaaataatttcacttctatatgaaacaaaaaatgattt(A)15	79	-	CTCAGACAATTTGGGGCTTG	AAAATGCGTTCAACCGAGTC
chr1	19223972	19224325	c	(AT)15ag(AT)11	54	-	AAGTGAACGCAGCCCAATAC	TGGATGCATGTTGCAATTTT
chr1	19243576	19243941	c	(A)16ggtaagagaaaaacgtgtaaagaatgaaaatttggaaac(A)11	66	-	TCAAGTTGCGAGTAGTGTGGA	AGCGAAAATGAGAGTTGGGT
chr1	19243749	19244121	c	(AT)12a(AT)24	73	-	ACCCAACTCTCATTTTCGCT	AGGGGTTGGAGTAGAGGGTG
chr1	19264115	19264505	c	(TC)7c(CT)15(AT)23	91	-	GGGAAATGTTCAGCACCCTA	CTGATTTTTGGGGAGGATGA
chr1	19326143	19326552	c	(T)17gggtccgtttttaatgagctgaccgaagtgcttttgtactggtccgctctttaaaaatggaccagaaccttaattttcatcga(T)10	110	-	AATGAGCTGACCGAAGTGCT	CCCTTAAGGTAAAGGGGGAA
chr1	19360645	19361014	c	(GAA)5aagaaagattgaagcttcaaggtgggtgcaacaaaataccccc(CT)6	70	-	GTGGGTGCAACAAAATACCC	AACCTATGCCTTGAGGACCA
chr1	19377027	19377397	c	(A)10caaaacaaaaaaataaaaaaaataaaaacaaaaataaaaat(AATA)5	71	-	GGACAGGGCATGAATAAGGA	GCGAAAATGTTATTTTGTCGG
chr1	19396506	19396861	c	(CT)12(CA)16	56	-	TCACCAAAATGATGGCTGAT	TTGAGCCATTGTTTGAGCAG
chr1	19415364	19415758	c	(T)10atttgtcttggcatattgatgagggca(AT)29	95	-	GGCATATTGATGAGGGCAAT	TTCCTACCAATGTGCAAAATAAA
chr1	19450191	19450604	c	(T)10aatctatgtgctgtcaatgggcagcacatcttgccaactaaaacctaaatataaaaacaaacaaataataaaaacaaaaaaatttccctctttc(T)10	114	-	CATTTTCGTTTATGGCACCC	TAGTTGGCAAGATGTGCTGC
chr1	19458263	19458638	c	(T)11attttttataaaaaaacttaaaagaacacatttttctttttttaaaaaaact(A)13	76	-	CCAAACCATTGGCCATTAAA	CTGATTGAGGAGATTCCATGC
chr1	19459597	19460020	c	(T)11g(T)10gtttttaacaaaaacaaattaaaaatgttgtcacacacccgccatcaagtaaaaaaacgttgttgttcctaaaagcaattattttatga(T)13	124	-	GTTGCACACTAGCCACCAAA	TGCTTGATCTGGCATTTGAC
chr1	19485506	19485880	c	(CT)6tcactaccattaacgaacccaca(AC)8(TC)12	75	-	TTTGAGGGATGAACCAGAGG	GTGTGTGTTGTGGGTTCGTT
chr1	19508261	19508623	c	(A)15cgatttgatctttcaaaccaacagaaaaaaagaaaag(A)11	63	-	TCCTTTTTCATCATCTCCGC	TTGAAGCTTTGATGGTTGGA
chr1	19574999	19575392	c	(A)14ttttaaaaaaaattatgtgctgtcaaggggcagcatctcttccctataacacatttaaaaaaaataaaat(A)10	94	-	ATTATGTGCTGTCAAGGGGC	AAGGTATGGCGATTCATTGG
chr1	19605979	19606394	c	(A)10gtgttagacaatactaacgtccccatgaagtcttgaacgttagtattatctaacatttttttccaataatattctttatcattttgtcttttagtg(A)10	116	-	AGTAAGCAAACATTTATTGTGTAAAAA	CAAGACTTCATGGGGACGTT
chr1	19620076	19620506	c	(AAT)5aacagtaataataaaaatc(ATA)6(ATT)5tgatttaaaatcgaagttcatgttcttaatctgt(AG)15	131	-	GTATCAGCGAAATCCATGCC	TTCAGGTGGGGATTTTCATC
chr1	19621005	19621355	c	(GA)6gtgtgtgagaaaataccttca(AG)9	51	-	GAACCAAGGCTAACAACCCA	ACCAGGACTCGGTCCTCTCT
chr1	19621200	19621714	c	(AG)7actttttttcagttattatttccaaatctaacgtgcatttttatttaattattatatattagattacgcc(A)10gggaagtgctactcacgtgatttaaaattctcgaattcaagcgattcttttttacataacccttggaactggaattaattataattataccctttttc(T)11c(T)11	215	-	GAGAGGACCGAGTCCTGGTA	TCACGTGAGTAGCACTTCCCT
chr1	19649339	19649705	c	(A)13gaagaaaatcacattagttaattttcaaaattagaaaaatatcc(T)10	67	-	ATTCTAGAAATGCCCCCACC	CGACCGACCCATTAACAGTC
chr1	19675865	19676315	c	(T)19ccatttctatcatctctaacaaacacaaaacacgtgcctgttcatagaattacattccaatccaacagcgaacataaaacaatttaaaatcttc(A)14(CA)12	151	-	CCACACTTTCGTTGCACACT	GAACAGGCACGTGTTTTGTG
chr1	19676357	19676733	c	(A)11tcagcaaagcagaaaccagatctagaaaaccttctatagcaaaaaacataattcg(A)11	77	-	TCTAGCAGCCATGAAATCCC	TCGCAGAGAGTTCCTCAGGT
chr1	19683143	19683660	c	(A)10tagatggtcaagctaatctaagtctaaaaaaagtggcttcaacaaatttgagttcaagaaataaggtttcaagttgattttgttagctatataaag(T)12aagtttgatcatgtgtttgaactatttttggcccataccataggtgaatgaaaaattaaaagtcaaagtaaacttgaagaaatctagg(T)12	218	-	AAGGAGGCCTAATCCAATCC	CCTATGGTATGGGCCAAAAA
chr1	19705076	19705462	c	(A)11gattattaaaaatttttaataggtcaaaaagatttttagaattttgtggggacagttaagggtata(T)10	87	-	TTTGTGGGGACAGTTAAGGG	GTTTTAAGGGCATCTTCCCC
chr1	19719074	19719448	c	(T)11atatatgtcatcttccccaacgcgtccatacagccgagacatataaaaaacaaa(T)10	75	-	TACCGAATTCGTCCCACATT	TTTCTTCCTTCTGCGTCGAT
chr1	19726350	19726769	c	(T)10ggagttataatggttgtttaggataagaatctgctttgatatgatataattacctctttgaaagtaatgaaatttggttctttaaagagaataattgatt(A)10	120	-	CAAATAAGCAGAAATTTGCAAGG	AAAGGAAGAAAATTGGGGGA
chr1	19733011	19733382	c	(TA)10(GA)26	72	-	AAAAAGGTGTGTCGCAAAGG	ACAAATCCCACCACAACCAT
chr1	19758489	19758848	c	(T)11accttttctctttatctttggtgtttcaccatgcactct(A)10	60	-	CCACACCAACTGTGCAATTC	GTGCATGGTGAAACACCAAA
chr1	19763962	19764351	c	(AT)23(AG)22	90	-	CATCGATCGCATCAGTCATC	TTTTTAAAAGCCCATTCCCC
chr1	19772395	19772818	c	(C)16ttcaatctttctcgaaaaaaaaatccttgataattataaccatagagacatggtcaaaatgttctagccctctcaaattt(A)28	124	-	TAGTAGTCAGGGGCAAAGCC	CAAAATTGAGGGGGCAATTA
chr1	19781626	19781990	c	(AT)6aaaataagaaagaaaga(AG)18	65	-	CCTTGAGAGCTCCTAATGGC	AATCCGTTAAGCACCCTGTG
chr1	19827126	19827586	c	(T)20aaactatactttgaatcagaagaaaacaacggttttaatcaagcttgaaccagcgatcatggaggacaaaacag(A)12ccgatttattctaatgaaaaatcgtttaaatcgagtcgg(T)16	161	-	AAGCTTGAACCAGCGATCAT	GGTTCAGCGTTTTTAACGGA
chr1	19827521	19827985	c	(A)10tcgattttttaaatagcagccccatgttgctgtagacagcacctc(A)10tttaacttaacaaaaaacagcaaatggggatgtcaaaaggattatctttcattttttacatatcaactcccttaacccattatcattgtt(A)10	165	-	TCCGTTAAAAACGCTGAACC	CCTTTTGACATCCCCATTTG
chr1	19834550	19834951	c	(T)10aaataataaaaaataaataaaaaatttgattttaaaagataaaaaaaaacttctttaaaaaaaattgattttaaagaac(A)13	102	-	AAACCAATTTTTATTTTATCAAGCA	AAGTTGAGGCGGCAATAGAA
chr1	19849919	19850279	c	(A)10ttttgaactttcttccccattttgacaatatatttttttta(T)10	61	-	CCCTTGTGTGGCATTTCTTT	GGGTACGTAGGCAACCTGAA
chr1	19873739	19874149	c	(T)10gacaattttcttttatggttcaagcctccaaagttaggtaccaatatttatttcaatattttc(CT)19	111	-	TGGTTCAAGCCTCCAAAGTT	ACGTCACATGTGCAAGCATT
chr1	19893931	19894353	c	(CT)11gtctctctgcagatatctgtccatcttcggtaaaggttaaggtggattggcatgcaagttcagtaccctaagagaggattccacaaatg(TC)6	123	-	TACCAAATAATTGGGGCTCG	GAGCTATTATGGCACCGGAA
chr1	19895383	19895772	c	(T)19cacttggatttcaaagtatagcaaaatagtttggcaaatttttgtaaaactt(A)19	90	-	TTCCAGATTGTATTGAGGTGGA	GGCTGACCTCCTTTTCTGTG
chr1	19922854	19923231	c	(T)10cttaatcttttttactttttttttgtatttatcttttttgttttggtaaaaatc(T)14	78	-	TTTGTTGTGTTTCGACAAATCAG	GTGTTTTAAGCACGGAGGGA
chr1	19942839	19943233	c	(T)12catttgtttgatgatacgcatgcttaaaaggacataatcggagaaataaagtgaaaatcagattttttg(T)14	95	-	AGTTTGACTGTCCATTCGGC	CCAAAAACCAGAGGCAATGT
chr1	19956817	19957217	c	(A)13gtagttgaatctgaaatttttaagccacaggacaaatgtgttagctccctaacgtttgctgccagacaccaccc(TA)7	101	-	TGATGTGGTTGTGGGAGAGA	AACACATTTGTCCTGTGGCTT
chr1	19962818	19963239	c	(TA)30(TG)8(GT)23	122	-	GGGTGGGCATAATTGCATAG	CACACCACACACACACACACA
chr1	19976393	19976797	c	(A)10tactaaaccgtacatagtgaggtgtattggaaactataacatccacatatacaaggggaatatcaccctaac(A)23	105	-	AGTATTTCCTCAGGGCCACC	ACTTACGTCCGATTAGGGGG
chr1	19977173	19977678	c	(T)11aaattttgagtataatgaatttaaacacattatattaatatttaatatttaaaatattatattaataat(TATTA)5atattattatattatattaatattatagttaaaatgtcaaaaataatatagtttgaaagcatattatgacactaaaagacagtctgtcaa(T)11	206	-	CTCAAAACTCTTCTTGCGGG	TTTTGTTTGATTTAAGGACAAATGA
chr1	19980934	19981283	p2	(AG)25	50	-	TGGGCCATGTTAAGGTGTCT	ACCATGCTTGCGAATAAAGG
chr1	19982217	19982604	c	(T)12atttttctttttaaattttaccttttacctctttaacttcaaaattctttaataatactttttcaa(T)10	88	-	TCTCTATAACCTTGGCATCAAAC	GTGTAAGGGCGGCAATCTTA
chr1	20017776	20018174	c	(A)10cacatatttctgtggagaattttccatcgttggatcttctcaacacaatctcacataatgaaatgtatttatga(G)15	99	-	ACCCCACGAAGCAATGAAT	GTATCCCCACCCTTCGAGTT
chr1	20039728	20040130	c	(AT)22a(AT)29	103	-	AAGAAGTTCGCCAAGCATGT	GACCAACCATTGAGATATGCAC
chr1	20094104	20094461	c	(T)15ggataattaacaatccaatttgatttatgaaag(A)10	58	-	TCGTGGCTTGGATCATTGTA	TGTGCTTTCTGTGTGCACCT
chr1	20120718	20121109	c	(CT)10cacagtcgctccttctatcgaa(CT)6cagtctctctctcgatctca(TC)9	92	-	TTTCTCTCTTCCTCCCTCCC	AGAGTTCGATCGAGAGAGCG
chr1	20124590	20125021	c	(A)25ttctcttggtgtgccgttagcagaaatccgtttctgccgtttctatcttcttctccactcatgctgaaaaatgaaaaacagcaagaacgtttt(TC)7	132	-	AAAATTCTCTTGGTGTGCCG	AGAGGACCCATCACAGAACG
chr1	20125835	20126262	c	(TA)30tc(TA)13(AT)20	128	-	TGCAATTGGCACATCAATTT	CAATTGCAACCCTCAATCAA
chr1	20134730	20135149	c	(T)10aaaggggggatatatttttggtaggtatgttcaagcaattattttttaggtttttaattgtttttttttaatattaatttgtttggtcaatttttc(A)14	120	-	GGATCCATTCTTTAATCGTGTCA	GGGAAGCACGCCTAAACATA
chr1	20158841	20159246	c	(A)11caaatt(TA)34c(AT)10	106	-	TTTGCACGAGATCTGAGGTG	TTCGTCTTCTCCAACCCATC
chr1	20168936	20169316	c	(T)18agaacgtttttttttaa(T)12atttttattattatttttttat(A)12	81	-	CAATAGTTTGCCAACAACATCAA	TTTTATGGTCCCAATCAAAATG
chr1	20183828	20184213	c	(A)15caagaaatgtttaaaggtgataatttcatagctataaaatttaaaattaaaaaatt(A)15	86	-	GGGTTGCTGATTTCTTACCTG	TCTTCTACCCTCTGCGTTCG
chr1	20184433	20184842	c	(TA)6ccgcaaacgtcgatctctactaattcccaaataaactacattgctaaaaagacctaaata(AT)6(TA)7(AT)6	110	-	ATACCGCAAACGTCGATCTC	CTCACCAAAAATCAGCCCAT
chr1	20198933	20199300	p2	(AG)34	68	-	CAACGTTAGTTCACGGGGTT	CTCTCTCAAGGGGGCTTTCT
chr1	20269443	20269802	c	(AT)13(TA)17	60	-	CCTCACAAAATATCAGCCCAA	AAAATCAGCCCAGTCGAAAA
chr1	20273179	20273539	c	(AT)16tatatat(TA)11	61	-	GTCATGTTCAAGGGCCAACT	ATGGGCTGATTTTTGGTGAG
chr1	20274857	20275242	c	(TC)8caacagaaaccctaaggtaaacccttaaaaaaattttatttcatatttttatttcatttg(T)10	86	-	GTTGCGAAGAAACGAAGAGC	CCGAGTTGGATTTCTTCGAG
chr1	20279743	20280097	c	(A)15tcaaaatttaatcaagcaatcaactt(A)14	55	-	AAAATCAAAATTTAATCAAGCAATC	TGATTGATTTTAGTTGATGGAGTG
chr1	20281210	20281664	c	(AT)7acatatatatatacatatg(TA)10tg(TA)6tgtatatatac(AT)7acatata(TATATG)6(TA)10	155	-	AAGGAAAATCTGCTCCCTTTG	CACGAAGCAAAATAAAAATCTCTT
chr1	20291424	20291812	c	(A)13caaatgaaataaaaatatgaaataaaaaaaatttaagggtttaccttagggtttctgttg(GA)8	89	-	TACCATTGGAAGGGAAGCAA	CCTCGAAGAAATCCAACTCG
chr1	20324608	20325015	c	(TA)6atagaatatatgaaaggtctgttgcatgtttctcattaaaagtaatacatgagtgtctctagtaacaattcgagttattc(TA)8	108	-	AACCCATGGAGATTCCACCT	TGCATGCATTTGGGTTTTAT
chr1	20359911	20360413	c	(T)17ccacctttttcactctcatctcagtcccctctctctttcctttttctctatcctctcctctctttgggtttctctcacacacacacgcgcgcatgcg(CA)8ttcttagcccactctctctttagttttttgtaaggaagaatttctattttatagatgtctaa(T)11	203	-	CGCACACACACACACACATT	GCAAATCGCCTTCAATCAAT
chr1	20370668	20371067	c	(T)10ctaagtaccatttcaaacttgactattaaatcaaaattttgaattaagtcaaattttagggggatttactaaattacaac(A)10	100	-	ACCTCCCTTGACTGGAAACA	TGAGCAAATCAAGCAACTCG
chr1	20371928	20372277	c	(CT)12c(CTTCT)5	50	-	GACCATTGTTGCAACCCTTC	TTCGATGTCCCTTTGATTCC
chr1	20406063	20406458	c	(A)10taaaatggaataggttaaatcaagtaagtaaagatcctagaattactacattggttagtttatgatcgaaaatagc(A)10	96	-	TCCGAACCAAAACTCATCAA	TTCGGATTTGGGTTTCTAGG
chr1	20408219	20408574	c	(AT)8(TA)20	56	-	ATAGGGTCACGTTCAATGGC	TGGCTGATTTTTGGTGATGA
chr1	20439503	20439868	c	(A)12ttgctgcttcactctggatctcccaaatacttatgtgtgc(GT)7	66	-	GCGTGTGTGTGTGTGTGGTA	TGTTGCAGAAATCAAGGGAA
chr1	20483207	20483579	c	(A)10tttatttttttatatgtctcggccgtatggacgcgttggggaagatgacatat(A)10	73	-	ACGTAGCTGCGGACATTTCT	TACCGAATTCGTCCCACATT
chr1	20493364	20493751	c	(A)10tttatttttaacccgaatggtcctgatgttataggaattgggattaacgatttaatttgtctttctg(T)11	88	-	CAGTTCACAACATCGGTTGG	CAGGACCATTCGGGTTAAAA
chr1	20510753	20511144	c	(A)10cattttcactattggcacctcacgcaaaaaaataaaatattttttcaaattttttattttttatttattta(T)11	92	-	GCCCGACAAAAGAAAATGAG	CGTGAGGTGCCAATAGTGAA
chr1	20526027	20526378	p2	(TA)26	52	-	TCACAATCCGATGGGGTATT	CAGTTGATCCAAACAAGCCC
chr1	20528692	20529054	c	(AAT)13(TAT)8	63	-	CGAATCAAGTTGCTCCCCTA	AGATCATGTTTTCGGATGCC
chr1	20537752	20538107	c	(AT)7tgatttttagtcaaggtaaacttaatcttgca(T)10	56	-	ATTGTTTGTCGATTGCTCCC	ACCACCCATCCAAGGTGATA
chr1	20586308	20586679	c	(A)10ttacaattaatttttggcttacatgaggataaactgaaagactaaaaatac(A)11	72	-	TTGACCACCTAGAACTGGGG	TTTTGACTTGCTTTTGGCCT
chr1	20590257	20590656	c	(A)25ggtcaaaaagtcaaaaaaaataaaaaggtc(A)10gtaaaaaacaaataatcataaagag(A)10	100	-	GGTATGGGGATGATCAATGG	CTGAGTTGCACGTCCCTACA
chr1	20615786	20616207	c	(CT)7ttttca(T)10ctttctttcactctattattgctcccatcaaaccaacattatcatctacacctttgtataaccacccaaatcaaaagaacct(A)10	122	-	GGATGGATTCCCCCATTTAC	AATGTTGGTTTGATGGGAGC
chr1	20616037	20616432	c	(AG)10atcatgtgtgtttgtgcttcccccttttcagggcaattgcagcaccttgacttgagtggcttcc(T)12	96	-	CATGTGTGTTTGTGCTTCCC	GGAGGGCATGTCATCACTTT
chr1	20663800	20664168	c	(TA)6ggtatttacaagctctttaacagttcacaaaatagttac(AT)9	69	-	CTCCACTCTCATACGCGTCC	CCCGAAGGGATAGTTTGTCA
chr1	20713827	20714205	c*	(A)10gaaacaaagattaggttacttg(GA)13(AGA)8*	79	-	GAGGGTTTCGTTGGTGAAGA	TTCACCCCAAGGAAAATGAG
chr1	20721664	20722033	c	(T)13ccctttttaattgtacccattttcaagcttaatccatgaaga(ATT)5	70	-	ACTTCCCAACTCACGAATGG	TCAGGGAAACAAAGAGAGCAG
chr1	20723732	20724098	c	(T)14ctctattctagttgcagtgttgtaataataagttgagtatc(T)12	67	-	GGGAAGAATACATTGATGCTTTG	CCACTGCATCCTTTAGGTCC
chr1	20775242	20775711	c	(CT)15(AT)12catgtgcctctagtcaatctcattacctggttgtgttgtgcctt(TC)23(TA)13	170	-	GTGTAGGGATGGGTGTTTGC	GGCACAACACAACCAGGTAA
chr1	20790548	20790917	c	(AG)8tagatcgaagtgagagaaatagaatagatcgctcggga(AG)8	70	-	AGAGCTCTCTGGCAGATGGA	GAACCGACTGCCTTTGTTGT
chr1	20794860	20795214	c	(A)17tacaaacaatagcatatcagta(T)16	55	-	CACTTGCTTGCTTAGCCAAA	TTGCTTCCGTAGATTGGAAGA
chr1	20812013	20812411	c	(C)12aagtgcgtttcttaactcaataaattagattttcccaatgtgcaccgacctaccaacaatgaggtcagaattccttc(T)10	99	-	CCGACCTACCAACAATGAGG	TGGGGGCTCAATGTAAGTTC
chr1	20859987	20860400	c	(T)10gagttttcaatgtacctaggtaggaggacataggttaaatgtata(AT)23g(A)12	114	-	TTTTCTGTTCTTTGCATGCTC	CGGATCTTTATATCCGCTGC
chr1	20861275	20861642	c	(T)15gaagcccattctacgagaaaatatttgatagactagggccgtc(A)10	68	-	ACGAGCATATTTGACGGGAG	GATGCAAAAATGGGGTGTCT
chr1	20863632	20863994	c	(AT)6tttctgtttttatcctttgtttatatatgttttaaag(T)14	63	-	TCTCCGCATATCGTTAGGATT	CGAAGCCTACGTAAAACAAAAA
chr1	20871559	20871969	c	(T)11atgtatttaacttgttttttaagtaaaataaacttattttttcaaaaggtagtgctgtccattgacagcaagaaagaaaaaaaaagttt(A)11	111	-	CAAGTTGCTGGAATTTTGGG	TATCACACCCCACTCACACC
chr1	20893622	20894001	c	(T)10ggaagttctactctacctacctggagtgaaagagtaatgaactatttttgttttttg(T)13	80	-	TCTGAGCAAAAGTTGGGAGAA	GGCAGGCAGAGTAGGACTTC
chr1	20894439	20894802	c	(T)10gaagttctactctacctactcggagtgaaagagtaatgaactaa(T)10	64	-	CCTGCCCAGGGTGAATAGTA	GGCAGGTAGAGTAGGACTCCC
chr1	20921803	20922162	c	(AT)6tttctgtttttctcctttatttatatatgcttaaaa(T)12	60	-	TTTCCGCATATCGTTAGGATT	CGAAGCCTACGTAAAAACAAAA
chr1	20959744	20960217	c	(A)14ttaaattcgaatcagcattggaccctagtgataaaaaataaaaataaaatatcattcaaaatcaattgtattgcaagg(A)11tacttacctattctaactcttgatagatttgggttttgaacaaaaatcctcct(TTC)6	174	-	ATTCGAATCAGCATTGGACC	AGAATGATCCCGTTCTCACG
chr1	21014469	21014888	c	(A)11gaattcaatgaattggtttaggtgcgaacaccatctttggtgtgtatgagaagtatgggaacaaactcaagcacttaaatgagcaac(T)22	120	-	GCTTTTGGGTTGATCCTGAA	AACCTGAAGCCCATTGTGAG
chr1	21015304	21015694	c	(TA)14tttcgtttgaaatccgattcaaatctagaattgaagaaagatttgctcg(TA)7	91	-	CCTCTTGCTCTCGACGAAAC	CAACCCAAACGAGTCAACCT
chr1	21033583	21033932	c	(CT)10tctctc(CT)12	50	-	CCTCCCCAGGTAGAAGGATT	GAGAGCTTACCATCCCCTCC
chr1	21061501	21061870	c	(TA)6(AT)29	70	-	CCCTGAGGAGAGACGACCTA	CACGGCATTAGCCCAATAAT
chr1	21064540	21064894	c	(AGA)10gagaa(AG)10	55	-	GACAAGGAAGAGGAAAGGGG	CATCGTTATCGTCACCATCG
chr1	21068277	21068632	c	(C)15ttctttttcaatatattatacttttc(A)15	56	-	AAAACAAAAGGCATCCATCG	TTTGGAAACTGGAAATTGGG
chr1	21082913	21083285	c	(TAT)5attattaataccattgttattggttatccaaaaaacaaatacc(ATT)5	73	-	TTGAATGGGTTGAATGGGTT	TTTTGGATAACCAATAACAATGG
chr1	21102713	21103110	c	(AT)8tacggttcggatttcggattggttcggtttattatattcttaatccggaaccgaactgaattaacctga(T)13	98	-	CCGTGGGTGTATTTAATCCG	TCCGAAAATAGGGTGTGACC
chr1	21113879	21114240	c	(A)11ttaagataaatattttgaaatgtttatttgttaaaatatga(T)10	62	-	CATGTTAATACGGGGCGTTT	TCGAGGTTTTGATGATTGGA
chr1	21141078	21141429	c	(TA)12atatataatata(AT)8	52	-	CCGTAGAGATCATCCTCCCA	CGTTCAATGGCCAACTTTTT
chr1	21141518	21141879	c	(TA)10t(TA)14t(TA)6	62	-	TTCCAAACATTTTTGCCCAT	CGTGAGGTGCCGTTTATTTT
chr1	21163688	21164119	c	(A)17caacaataaaaaatttgacgctttgatcacagttgaacatgggctattttcatgttgtggtatgtatgcgtgcgttcgtgcgtgcgtgc(GT)13	132	-	CAAATTTCAATGGTCCAGGG	ACACACACACACACACGCAC
chr1	21190484	21190839	c	(TA)12(AT)16	56	-	AAGTCTCTTCGCACATCCGT	AATATGCGTCCCGTCTATCG
chr1	21216927	21217334	c	(T)15ctctcttctttgttaagttgtatcaagggtcatctagaaccggtcttttcactcattttaataaaattccaacttatc(A)15	108	-	TCTTTTGGGGGAAGGTTTTT	CCGGTTCTAGATGACCCTTG
chr1	21219019	21219434	c	(A)15cc(A)12ctctacataaatgaaggaaattttatgaaaaataaggaaactctacatatacaccagtatcataaatataaattttc(T)10	116	-	TCAATTGCAGAAGGGTGGTT	CCTAAAGGCCTAAAGTGGGG
chr1	21279765	21280178	c	(T)15gctaatgcccctagtttggcattctcttcttttgaacattttaataggggattttccttttggatgacactttttttaatagaataaa(T)11	114	-	GGTGGGCTTAGGGTATGGTT	CCAAACTAGGGGCATTAGCA
chr1	21284965	21285357	c	(A)10taatacccaaaatcatctacaatcaagacaaaaaaataaataaacagaaaaaataaataaaataaatccaact(A)10	93	-	AGGTCATCTTGGCAATGCTC	CCAAACCTCAAGGGTCAAAA
chr1	21296434	21296785	p2	(AT)26	52	-	GGACATGGTTCTTGGCACTT	GCCAAGTCGACTGGTCCTAT
chr1	21301627	21302016	c	(T)12gggctagtcccctctcccctctgtatcattcttttttttaataaattcatctttactgatatcaaac(A)11	90	-	TGGCCTTCTTGTTTTCTTGG	ACAGAGGGGAGAGGGGACTA
chr1	21314215	21314822	c	(A)10ttgggtttctaaaatttattgaaaaaattaattattttccaaaactacaaaacccaaaacaaaatgggtttcatgagaggtacctgcagctgcacgcc(GA)8ggagatccgtcggctacctacagccagccagccacacgcccgcggtcacatgccagtaaccgcacgcc(GA)6gtgagttgcagcccacagctggttaccggagttgagatgcaaacacagctgcaatcgtactgtcacacagtcgcacaaatggcaagagat(GA)7	308	-	CGCCGAGAGAGAGAGAGAGA	GTTTGCATCTCAACTCCGGT
chr1	21324870	21325220	c	(AT)9(AG)7a(AG)9	51	-	CAATCAACCAAAACCCTTGA	TCCCTAACCCTCAGACAACG
chr1	21347738	21348087	c	(T)15gataagtattgatttcatgaatg(T)12	50	-	TGGTTTTGAATTGATGTGGC	TCATGTGACAATTTTTGGTGG
chr1	21352554	21352983	c	(C)10(A)22ccaatctaaacacgt(AC)8aaaaggtgaatgattttaatggtgttgtacttttcatcttccataccatttacttgt(A)10	130	-	TGCAATGACCTTTGTTCCAA	TGTGTGTGTGTGTGTGTACGTG
chr1	21393168	21393547	c	(AAT)5tgtgagggcaactaatagtaga(T)11gtgggggcaatagtggtag(T)13	80	-	TCACCAAGTAGACAGTGGCG	AACTACCACTATTGCCCCCA
chr1	21394110	21394575	c	(CT)14cgcgcgcgcgcacacacaacagagcaaaacagagctgaggaacaaaagaatttctctcttgtacaattaacaatggcttctgcaacatcacccact(TC)6ctccccaccact(TCC)6	166	-	TGTCCACAACTCGTCTCCAG	CGATGCGACATAAAGAGCAA
chr1	21407341	21407698	c	(A)10tagtactagatggaattgaaataattaaaa(AAT)6	58	-	ATTGGCAGTGGAAGGGTTTT	GAAAGCGAGCATTTATGGGA
chr1	21407614	21408096	c	(A)15ttcacctacgtttctacttaaatttttttaacctaatctatttaaagt(A)11tagttagtttccaaaatacaattaaaaaaatatcttgaaactttaaaagacgatccatatgttggatagtattccacttaagaaattccatttaaagt(A)11	183	-	AACGTTGGATTAGATTCCCAAA	TCCAACATATGGATCGTCTTTT
chr1	21414880	21415304	c	(CT)6caaagtaaatctaaaacccactttttttcaatcgtgcgagctccattaacagaataaccgccatcgtctccgatcggcgagtatcaggtagtttcttca(TC)7	125	-	TTTCCATCGTGTAAGCTCCC	GACGATGGCGGTTATTCTGT
chr1	21416519	21416897	c	(T)17aaataagttagtaatttcttact(C)16(A)12t(A)10	79	-	TCTGAATTTATGAAAATGACAGCAA	CACGTGGAAGTTTCAATCCC
chr1	21454210	21454565	c	(AGA)5ggaaccaaggaggaggaggaa(G)20	56	-	CCCCCGAAGGAGAGAATATC	TCCCGTCAAACTCTCACAAA
chr1	21475588	21475986	c	(T)10cttctttctgcaccttaactgtatgttgagttgactcactttctttcttcgtcaatttgtagtatccctagacttga(T)12	99	-	GCTGGTTCTGTGTTGCGATA	TGAGAAGCAGTCAAGGCAAA
chr1	21498386	21498749	c	(T)15gtttttgtttttgtttttgattttcttacttatc(A)15	64	-	CGCACAAAGCACATCAAAGT	ATGCCCAACTTGGAACAAAA
chr1	21500862	21501226	c	(T)10actttaaaaaatgtgagctatgcctcacgtcaagtac(TA)9	65	-	GAACTGAACCTTGAACCGGA	ACAATTCCCAAGTCCCAACA
chr1	21538091	21538440	c	(A)10gtttggatattgagtccttacaaac(A)15	50	-	GGCCCAACGCTTTCTAAGTT	AGAGAAAATGGCTTGCTTCG
chr1	21546462	21546944	c	(T)11catttttttctttgaataacaaacttcataaagtagtaagttttgtaatgaaaatgccaaaaaggacaaggtgggccaaccatgatctgc(A)14ttcattatgagttattcaagttaggctatgttctcaaaagatttgccatgcatgattt(A)10	183	-	ATGCCAAAAAGGACAAGGTG	TGCTATGCATGGTACGTGGT
chr1	21549477	21549842	c	(A)11gaaaatgccctttgtgtaaagaggaaagctacatactat(A)16	66	-	CTCACCTCAAGGGTTTTCCA	TCCTCTTTACACAAAGGGCATT
chr1	21558166	21558624	c	(T)11gacggccctggactatcaaattattggagaatgggctt(A)14ttcatagagtatgaccatcgaatttggaggtttaacaaataatagcacggtcctctaattcaccaatcactatgaacgaaataat(A)11	159	-	GCACGGTCCTCTAATTCACC	TCAGTCAATATGGATGCCCA
chr1	21578776	21579430	c	(T)11aaaaaccggtctttgaaagaccggtttttctctctcttcatttatttctctcatcctttctctctcctctatcatttaaaaaaaaacgaatttt(A)12ggtttttctctctcttcattcatttctctcactcctttctctctcctattattt(A)11cgaattttttttaaattttttttctctctattcattcatttctctcacccctttctctctcctattatt(A)12cgaaattttttttaaatatatttttctctctcttcacttatctcttttacccttatcttctcttttctctaaaagaattac(T)11	355	-	TCTCCTCGATTTTCCTCAAGA	GGGGTGAGAGAAATGAATGAA
chr1	21580498	21580889	c	(T)10aaaaaaacgaattttttttaatttttttttctctctattcattcttctcaccccttctctctcctattatt(A)11	92	-	TCAAAGACCTGTTTTTCTCTCTCTT	GAGAAGGGGTGAGAAGAATGAA
chr1	21582471	21582892	c	(A)12ctttaaagctcgatgggaattccacgtgagaatttcaaaataatcttttttggaggagcttctcaagattaaatgaaaattttgaggtggaaggatttg(A)11	122	-	TTTGAGGTGGAAGGATTTGAA	TTCTGGATTGCTCTTCGGAT
chr1	21632224	21632610	c	(A)19gatttttccacttttttttctttgtttttagatgaaaattgatatggaatgg(T)16	87	-	AAGAAGCCATTTTCAAGGGA	AACACTGGTAAAATCCACCCA
chr1	21649813	21650456	c	(CT)21(CA)14actatttctctcgtgcacacaaatttctcgctctctctctcgttctctcgcactctcgctctctcgctctctcattctcattcttaca(CT)15taaaaactctctctcgatcacactctctatctttgtatttgtctctcgcacgca(CT)9acaacattctagatctagggtttgtgaactcgcttcctaaatttgtcgcaaatctacaaatttgcgtacg(CA)7	344	-	CGCTCTCTCGCTCTCTCATT	GCGTGCGAGAGACAAATACA
chr1	21650499	21650924	c	(T)22ggtaattagggttcgattggttttgttatggtttgttgagatttggtaattaggaaaattataactttgacaaaacacccaatttaaggctg(T)12	126	-	TTGCGTTCCATCTTTTGAGA	AACAAAACCAATCGAACCCT
chr1	21671562	21671927	c	(GA)8ggcaacaacagattgcagcgctcgtgcgcacgag(CA)8	66	-	GTAAAGATGAGGGAAGGGGG	ACGGGGATTTGCCTAGTTTT
chr1	21680796	21681161	p2	(AT)33	66	-	GAAGTTTTGGAATGGGCTGA	TCCCGTTCAGTGGCTAACTT
chr1	21689722	21690238	c	(T)10aaattgttcttttttttaagagaaaaaccgaagattgtttaaaataaaaaattttgaaacaaagaaaac(T)17aaatgttttttttaaacattttttttattttctttttatttttaagttttttctttttattttttaatttttttaaacg(T)10atttaattttttttaacgtttg(T)10	217	-	GGTGACCCTAACCGAATTGA	AAACAATCTTCGGTTTTTCTCTT
chr1	21715791	21716164	c	(A)14tttggctggatcaacatattttgcaaaatacttggccgttttttgtat(A)12	74	-	GGTTCACATGATGGGCAAAT	GCAAAATATGTTGATCCAGCC
chr1	21736755	21737108	p2	(TC)27	54	SSR-5	TCAAATCCTTACCCCTTCCA	TGCATCCAATACTCCGATGA
chr1	21778335	21778741	c	(CT)6caatcgatcgagtctcgatagaaaaccaaccaaatcccgaaaaccctgttttcatcttcgtctccactgaactcc(CT)10	107	-	AATCTTGAGAGCCACCGAGA	ACCACCAACTGTGGACATCA
chr1	21783885	21784290	c	(A)10tcaatttattttgcagtccataaattgtttcatccctaagtctcttaagtttcccttcgtaatcccatagtcttcatcctttga(T)12	106	-	CCCCCAAAGTATTTGGTTATCA	TGGGATTACGAAGGGAAACTT
chr1	21796665	21797043	c	(CT)13ttctttcttattt(TA)20	79	-	GCACCTATTCGGATCAAGGA	CCTTGAGAGCTCCTAATGGC
chr1	21802778	21803217	c	(A)10ctacaa(T)15cccttccagtctcattttgatacagctttccagacacccaattgaacttctggtt(TA)27	140	-	CAGCTTTCCAGACACCCAAT	TTTCATATGGCCCTTGATCC
chr1	21822529	21822977	c	(AT)19agggtggcgttcagcaaccaacgttagggagccacacgtttgtcctatgtggcttaaatgttttggattcaac(TA)19	149	-	TCTTCAACACGCATGGTTACA	CAAACGTGTGGCTCCCTAAC
chr1	21826286	21826688	c	(TA)7agggtggcgttcggcagccaacgttagggagttaatacatttgtcctatattacttaaaagtttcgaattcagctg(T)13	103	-	TATATAAGGGTGGCGTTCGG	GCTGATTTTTGGTGAGGATGA
chr1	21852995	21853355	c	(AG)6cgagagagagatccagatcgagctgtgccac(AG)9	61	-	GGGCGAGAGATAGAGATCCA	GGCTCTCTCGCACTCATCTT
chr1	21867823	21868243	c	(TA)11tggaaatgttcaacaccctacactttaccctacgctttaccaaacgtgttttgtcctacatgggttgaacgggaccc(TA)11	121	-	CTACATGGGTTGAACGGGAC	ATCATAGTGACCGTCCTCGC
chr1	21886049	21886466	c	(A)10gatgaaaagattagtgggtattaatcgaaaattttatttattaactatgaacaaccaatctgtggagcacagagtatatattttatttg(A)19	118	-	AACAACCAATCTGTGGAGCA	TCAAGCAACTCCTTCGATCC
chr1	21925009	21925365	c	(T)42(G)15	57	-	TGAGCCAAACCTTTGTTTGAA	GAGAACTACCATTGGCACCC
chr1	21929261	21929684	c	(A)11gaggggggacgaattaccaaagcaattaacttgtatttctcttcccatatgttaaaatctcattagttcgttgggaatttatcctttgattttttttat(A)14	124	-	TGCAAATCCTACTTTTCGCC	TTGCTTTGGTAATTCGTCCC
chr1	21933948	21934554	c	(CT)6catctttgcggttatcatcgactgccaacggctcatctctctctctgtctctttctcatctttgcggctgccatcgactgccaatgactca(TC)9tgcgtgaggttgcgggcttgctactgtgagcgtgctctcaactccggtggtcgacagattttcct(TC)7cgtgcagctgcaagtacctgtcatggaaagttggaaacccattttgttttgggaagggttgggttttgtagttttggtcattttggagaaaaattaa(T)10	307	-	CGATTCGATTTCGGGTTAAA	GCCGCAAAGATGAGAAAGAG
chr1	21953284	21953655	p2	(TA)36	72	-	TGCTTGAATCCAATGGTTGT	AATTGCTCTTGTTGCATCCC
chr1	21959138	21959496	c	(A)12gtttaatcagaaccgaacacaagagtcccatttaaag(A)10	59	-	GTTGGCCTTGAGTGTACGGT	AATGGGACTCTTGTGTTCGG
chr1	21961788	21962197	c	(TA)8ttacctacaaatatttaggtccg(TA)6gggaatactaatgtccaagaccacatagggacgtcagcattttccaaca(T)10	110	-	GTGTCGCGATGAGAGTCGTA	GGAAAATGCTGACGTCCCTA
chr1	21994532	21994881	c	(T)17aaacaaaatttaact(TC)9	50	-	TTGGGTTGGTTAGTGGCTGT	GTTACCTGATGGGGTATTCAAA
chr1	22003098	22003475	c	(GA)6tacaatccattaaaaccatatacacaattaatggtggatagtagtaaaag(GA)8	78	-	AAGGCGAGGGTGAAATACAA	GGTTTCCGTTGAAAACCACT
chr1	22005202	22005602	c	(A)16tgagtagaaaaactaagaaagataaattaaaaacaaatccattca(AT)20	101	-	GAGCTGAAAGTTGGGCAATC	TGTTCAAATCATGTCGGTTGA
chr1	22010410	22010895	c	(TA)8tttgtaataaaatcaatttactagagcaaaaatttctcccattaaggttataatttgatggtttaa(T)10aataaacaatacaaataattaaataaaaataaagaacacttacgggtattccatcttttactcactacacaacaac(TA)9	186	-	TATATAGGGTCCCGTTCCCC	ATGGGCTGATTTTTGGTGAG
chr1	22028480	22028867	c	(A)10taagagtgaaaagagtggcttatatttattatacatttgatacgtaatagaacagccc(AAAT)5	88	-	TCGGTCCCTCAATAAGCATC	TTGGTGCATTTGTAATGCGT
chr1	22035796	22036149	c*	(T)12(TTC)10*(TC)8*	54	-	GGCTCATTTCACCCACTTGT	GTCTGTGCAACAAGCAATGG
chr1	22037201	22037550	c	(TA)9(TG)16	50	-	GCCGTTCATTTTCAACACCT	CCGCTGCCCACATATTTATT
chr1	22038309	22038737	c	(CT)8aatgcaattgattttgcatagatttagatatattttgttgatgtatgtgactcatattgagtggaacatgtatataaaagaaagatgcaaagcagtgga(CT)7	129	-	GAAAGATGCAAAGCAGTGGA	GCTTGGAACGCAAAACTCTC
chr1	22039474	22039831	c	(A)11cagtcaataataaacgacaaaatacaagtcacatacc(A)10	58	-	TTCTGAGCCACAAAATTCAGA	TCAAAGTGTACCCTAATCTTTGCAT
chr1	22056467	22056858	c*	(AC)15(C)10*tctcttcccattgttttaaaactcgtttttctctctct(ACC)5	92	-	GCCCTAATTCCTCTGAGCCT	AGGTGGTGGTGGTGGTAGAG
chr1	22081417	22081814	c	(TC)15cttcaaactatcacaattcacaaaaccaccaccctaccaaagaaaagttgta(CT)8	98	-	ACAAAACCACCACCCTACCA	GATGGTCTGTCGTTTCCCAT
chr1	22113531	22113918	p2	(AT)44	88	-	TGGGGCTAGAAGTTTTGGAA	CTATCCGTGGCCAACAGTTT
chr1	22115649	22116045	c	(A)17ctatggtgatatataaaaattattattttttaattaaatctcagtggcagtcactcaccc(CT)10	97	-	GCAGTCACTCACCCCTCTCT	GTTGGGATGCCAATAGCAGT
chr1	22132480	22132857	c	(GA)9tgacacacatgagactgttgttgaggagcaaccacaaggacaagt(GTG)5	78	-	CAAGGACAAGTGTGGTGGTG	GGCAGCTAAATTTGGTGGAA
chr1	22143808	22144158	c*	(A)13t(TAA)6(AATA)6*	51	-	CCAGCTTACCTATCCACCCA	TTGTTCTTGTGCGTGCTTTC
chr1	22188051	22188455	c	(AT)10acgtaagtggttcggatttcagattggttcggttctgttatatccttaatccggaatcgaaccaaatcaactgga(T)10	105	-	CTTAATCCGGAATCGAACCA	TTCAAGAACCGAACCAATCC
chr1	22193506	22193912	c	(TA)36(T)23(G)12	107	-	GCTTCAGGGATCTCTCTTTCAA	ACTGAGGCTCATCAACTGGC
chr1	22209313	22209897	c	(T)11aaataagaaagaaaattaactaaaaactaggaataagatctcttagattttttctttttatttattattaaaccccttaggaaatgggatttaagag(T)11aataatttaaaatactaattaaaaagtagagataatatcccaagatctcttagaacccacaaatttgtttgttttcccccc(A)11tcatactcttttatctttatctttcatttgtgacctcttccacattaaaattaaaatta(AAT)5	285	-	GGATACGGTCCCAACATGAG	TCCCATTTCCTAAGGGGTTT
chr1	22237642	22238011	c	(GA)11cagagaggagaaaatggaggaggagaagctctg(TAA)5	70	-	TTCTAATGGATCGTCGGACC	ACAGTTTCTTGGCTTGCTCG
chr1	22237853	22238372	c	(T)16cattttgggtttattttggtttttttgattcgttttgagtatttggtttcgatgatggatcattaaaaacatg(T)21ggggtgggtggggggatcgtgatctctctgtttttaaaagggattactttgaattttgtgagtgtgattatctgtgtgatctgtatctctgtaatttg(T)12	220	-	ATACGCGGATGGAATCTACG	TGATCCATCATCGAAACCAA
chr1	22248498	22248869	c	(TA)26ttt(G)17	72	-	ATGTTGGCTTCTGGATCAGG	ACACATGGTTGCACCAATTC
chr1	22254201	22254582	c	(AG)6tggggggcaaagggtggaggggtgatggtgatggtgatggtggtggttgaagaaa(AAG)5	82	-	TGATGGTGGTGGTTGAAGAA	TTGATCCATTGCCACACCTA
chr1	22272984	22273360	c	(A)13gtaaatttgcaaaagaaatttattttgtgtgcctatgtaaatctgtgaccc(A)13	77	-	CCCCATTTTTCTTCCAACCT	AGTCCTGGAGAACAGGGGAT
chr1	22278561	22278912	c	(A)10taaacctaaaacttcaaactc(A)21	52	-	AGCATCGGTGGCTTTGTAAC	TGGCCATGAATCTGTTGTTT
chr1	22335207	22335636	c	(TA)14tgtaggttccagacctgtaggcccgacttgtaagggtgaggcaactggcctcttaaagcaccatatctctcccggggg(AT)12	130	-	TGTAGGCCCGACTTGTAAGG	TGGTGCTTTAAGAGGCCAGT
chr1	22348058	22348481	c	(A)11ctcttaaatcccatttcctaaggggtttaaaaataaataaaaaaaagaaaatctaagagatattattcctattttttagttaattttctttcttattt(A)15	124	-	TCCCATTTCCTAAGGGGTTT	ACGGGTCGAATACAGTCCAG
chr1	22356948	22357427	c*	(A)11tctactgagagaagtagtgattatagtttcttgtcaataatatccctctaacattctatcttccctcttttacccctttaactca(TC)15(TA)9(TATC)6*(TG)7	180	-	ACCAACCTTAGGGAGCCAAT	TTGGGCTGATTGTTTGTGAG
chr1	22358561	22358922	p2	(AT)31	62	-	GAAGTTTTGGAATGGGCTGA	TGGGAAATGTTCAGCAACAA
chr1	22384237	22384826	c	(ATT)5taattttaattttaatgtggaagaggttaaaaaggagggaaagataaaagaatatga(T)15ggaaaacaaacaaatttgtgggaatctagagatcttcggatattatttctactttttaattagtttttttacttatt(A)11ctcttaaatcccatttcctaaggggtttaataataaataaaagaaagaaaatctaagagatcttattcctatattttagttaattttctttcttt(A)20	290	-	TCCCATTTCCTAAGGGGTTT	GGGTTTAAAATGGGTCGGAT
chr1	22396460	22396818	c	(C)14aacccccatgtgtgatgtgtg(TA)12	59	-	GGCTGCATTTTTGTGAGGAT	TACACACATCACACATGGGG
chr1	22416604	22416972	c	(AC)9aa(C)15(A)12tgta(AT)9	69	-	TATGTAGGGAGCGGTTCGAC	TCCTCACCAAAAATCAGCCT
chr1	22417128	22417507	c	(A)10tttgattgagcttctacacatatttccaccttaaaatttttatttccttaacaaaataag(A)10	80	-	AACTTTCACGTAGGCAACGG	CTTCCCTCTCCCACACAAAA
chr1	22420054	22420442	c	(A)10gaaaaaagaaaaatcctcaaatgggtattca(T)21gtgaaaaaaatcaat(A)12	89	-	CCCACAAGTCTCAAAAAGGG	TTCGGCAACTCCTGTTAAGG
chr1	22434918	22435312	c	(TAATA)6ttttaaatattaaatattaatataatgtgtttaaatccattatactcaaaattaa(T)10	95	-	TCTTTCATTTGATTTAAGGGCAA	TCATCTTGTGGGGAGTCAAA
chr1	22485056	22485421	c	(T)10aatctcatcttccccactcgtccaaacagtgcgg(A)11c(A)10	66	-	TCTCATCTTCCCCACTCGTC	GATCGTCAAAGTGGACCGTT
chr1	22530132	22530521	c	(TC)8atccatcctgtgttatatgctttgaatgtagggcaaagtgtggtccccacattttctctct(C)13	90	-	CAAACGATTCCCAGGAAAAA	TTTTGTGCACACCTCCACAT
chr1	22560829	22561213	c	(AT)21c(AT)21	85	-	CCGAAACTTTTAAGTCATTAAGCC	AAGGGCGTAGAGTTCCTCTTTT
chr1	22564420	22564786	c	(AT)6aatattatatatataatatatatag(AT)9(TA)6	67	-	CAACCCACTTTATTGTTTTCCA	CGGACAAACATCCTCTTTGG
chr1	22567902	22568305	c	(T)10ctattttttcgtatacgtcactataagtgtttttgaattttattttaattcagtttccattggatattgtttatttgtttctac(A)10	104	-	TGCGAGGCGACTATTGTCTT	TGGGTTGGAATAGTGATATGAGTG
chr1	22622076	22622426	c	(TC)6actcaccgatttttcttcgatcgaa(TC)7	51	-	CGATCGTCTCTCTCTTTCTCG	AGATCGAACGAAAACCGATG
chr1	22671272	22671636	c	(TGG)7ta(GTG)8att(GTG)5	65	-	GATGAGGTGAGGGATGGAGA	TTTTCCACCCCATTCAAAAA
chr1	22672491	22672846	p2	(TA)28	56	-	TCTTAGGCCTTGCCATCATC	CCTGTGGGCAAGCAAGTAAT
chr1	22699978	22700331	c	(CT)20(CA)7	54	-	ACCTCATTGTGCACCCAACT	TGGATTGCAATTTGGTCTGA
chr1	22708525	22708942	c	(AG)23acatatatacatgtattacgtcatataattttaccttcttcttttcatag(T)22	118	-	AAGCATAGAATGGTGACGCA	TGTTCAAGATGACCAACAAAAG
chr1	22717563	22717945	c	(TG)6tatgtatgaggatatacttgtaaataattagtgttcaaagagaaagcgagggagggagg(GA)6	83	-	CAAGTTGGGCATGTTTGATG	TCCCTCGCTTTCTCTTTGAA
chr1	22718849	22719234	c	(TA)28(TG)15	86	-	GTGTGTGTGTGTGTGCGTGT	TTTTTGGTGGCTTGAACACA
chr1	22741823	22742198	c	(A)10tatcatgactgatgaaaagaataagttaaaggaacaaattaaataatttataatat(A)10	76	-	TTGGAGGAAGAATCAGGCAG	TTCAGCATGAATGCCAAAAA
chr1	22745251	22745673	c	(AG)9ataatagatcaaattagatgcattatgatgcaagtgccaacttgctaagttggttaaagtctatgagtgttggtaccaactctcttggttatttt(A)10	123	-	GCATTATGATGCAAGTGCCA	TCTTCATCACCCTCTCCCAC
chr1	22763686	22764097	c	(TA)18tctatc(TA)9tc(TA)12(AT)13	112	-	GGGGGTTAGAGGTTTTGGAA	CGGTCCACGATTTTTCAACT
chr1	22765303	22765826	c	(GA)23acaattatacctgtacgtgtaatagcttggagaagacgaagtggaggagcagccgatg(GA)9cgaaggttgagttcgtctattgagagaaaaactttcgtctgtcgagagagaaaacagatattaagttgttt(A)10cgaaaaaaaag(A)10	224	-	AGTCATTTTGATATCCGCCG	CCACTTCGTCTTCTCCAAGC
chr1	22782287	22782697	c	(A)10cagcccgttccgaaactcctaaaccatacattgaaaaaatgtttgacacaatgtttggctccctttagggccttcgaacgccacccc(TA)7	111	-	GTTGAAGAATCGTGGACCGT	AGGGAGCCAAACATTGTGTC
chr1	22816950	22817331	c	(G)20ttaaagcgagtggggcccacagttttgtattattatatagatatcaagaaag(A)10	82	-	CTCTTCATGAGGGGGTGAAG	CAGATCGGGTTTGGAGCTAA
chr1	22823176	22823526	c	(A)18ttcttagatttttacaa(T)16	51	-	TCATCCAAATACGAAGCCAA	TGAGAGGGAAGAAGAAGCCA
chr1	22906483	22906851	c	(TC)7tt(TC)9tagtcactcaccactaagacaagaa(T)10	69	-	GGGCTTATGCTCATCTTCTCC	AGCAACCCGACATACACTCC
chr1	22960502	22960933	c	(TC)7acagtctcttatcgatcgatcg(TC)6acagtcatcgatcgatcgatcgcctcttacgg(TC)6acagtcatcgatcgatcgtctctcacgg(TC)6	132	-	TTGATCGATCGTCTCTCACG	ATCGATCGAGCGAATGAAAA
chr1	22962424	22962783	c	(TC)18(AC)12	60	-	GGTTGGGTTGAAAATGAAGG	CCCACTCAAATCCAAGTGTTG
chr1	22993572	22993929	c	(T)10gacggccctggactatcaaattattggagaatgggctt(A)10	58	-	GACCGTCCCATCAAATATGC	CTCCAAATTCGACGGTCATA
chr1	22995388	22995755	c	(AAT)6aaaaaagattagttgtttgaggattttcttc(A)19	68	-	TGTCAATATCACAAAGTCTCGGA	TTCCTGCTCTCTTTGGAATCA
chr1	23014541	23014929	c	(T)11aaatttattttataatttcacataaagaaatttgttaccatgtttctcgacagttcttaaaaaaacaa(T)10	89	-	TGCAGTTGTCTCTGATTCGG	AATGGACCTCCTGCAACAGT
chr1	23017989	23018354	c	(C)21tctcctctctttaataaaattatctttatcc(A)14	66	-	TTTGGGTTGGTCTTCTCGAC	CCCATTCAGCAGACAGGTTT
chr1	23037775	23038252	c	(A)10tttataaagtaaatcgactctaactgcagtcctcctttggcaaaagtt(GA)7gtatattgttgtattcatagagagaaaagagagaatcttttgtattctttcttttctaagggagggtattagagggtttttcattgtatttt(GA)7	178	-	AGCGACGCATTTAAAGAGGA	CTTTTGCCAAAGGAGGACTG
chr1	23063740	23064113	p2	(TA)37	74	-	GTTCGGATTGAGCATGGTTT	TAGTTCGGTTCTCGGATTGG
chr1	23075520	23075913	c	(TAATA)5ttttaaatattaaatattaatataatgtgtttaaatccttatactcaaaattaaa(AT)7	94	-	TGTTTGATTTAAGGGCAAATGA	CTCAAAACTCTTCTTGCGGG
chr1	23079814	23080212	c	(TC)6accttctgatcttcgtctttgtctctccaaattctctgctttagaaaccccaccattatcaccaccttt(ACC)6	99	-	AAACCCCACCATTATCACCA	ATGGGTTGAAAGCTCGTTTG
chr1	23095669	23096037	c	(T)12cttttttcttaaaaactagtgcacaattatcgacaaagtt(A)17	69	-	CATGCATGCCTCAACCTCTA	TTCCGACTCGCAATGAAAAT
chr1	23155826	23156197	c	(A)13caaagattgaggtgaggtgattgagatggaaggagggaggagacccc(A)12	72	-	TGATTGAGATGGAAGGAGGG	TGTTGGTTGAGTTGGGATCA
chr1	23165740	23166129	p2	(AT)45	90	-	GTCTCATCTCATCCCCGAAA	AGAGATCAGCCAACTCCGAA
chr1	23180629	23181141	c	(T)19ggaaattgaagaaaattgaaacaaaactagagaataaggaaagcacgttcaaaactccaaaatttaaaattaagtagaaacttgctttaagcaagag(A)10tcaataattaaaataaacctaaaaactaatcttgactaaactgaaactcgaaattaacaaatatatgacccttaatt(A)10	213	-	CAAAACCAGAGAATAAGAAAAGCAA	TTTTGGAGTTTTGAACGTGCT
chr1	23191243	23191643	c	(T)12gtataatttaagaaaagaaatgaaggattttcgtacacgatttgaatatagaggtttgagc(A)13gg(T)13	101	-	TTTTGGGTTGAAGATGAGGG	TCCGAATTCGAATCCCATTA
chr1	23197152	23197554	c	(T)13aaaattcaaaattcggcccttaaagggtcgaatttatttatttctatttttaaaagttaacaattacatctgtcaattt(A)11	103	-	AGTCAACAATTGCGGCTACC	ATCTTGCGATTGTGATCGTG
chr1	23202820	23203266	c	(C)17aattaactataagtttgcccccactaaaagaaaatcctggctccacccctggtgaggccctttatagcccctgctt(A)11gaaattttaagcaacctgatatgagcatctaca(T)10	147	-	ACTCCCTCCTCTTCCTCCAA	CTCGATGCTGAGCACTTCTG
chr1	23205040	23205414	c	(A)10tcaatcaatgcttaagagtaagtaaaagttgggggtgtcaaaagaag(CT)9	75	-	GAGAAGGCCGAATAGCAGTG	TTGTTTTCCAATTGGGGTGT
chr1	23228866	23229221	c	(A)10taccttaggtcccatattcaacctctttgac(A)15	56	-	CTTGGGATGCCAATAACACA	GGAAGAAGAAACTAGGGGCG
chr1	23230451	23230818	p2	(TA)34	68	-	ACACCCAGACACTAAGGGCA	TCTCCAAAAATGGTAGGTCCC
chr1	23312479	23312911	c	(AAG)5ccactttcaatggatttttcaaacattttgaagatatatgtaaaaaagtagggttttttca(T)17aagtttttgcatgaaaatcaattgataata(T)10	133	-	TCCATGGACCTCGTATCCC	TCCATTGAAAGTGGCTTCTTC
chr1	23318148	23318571	c	(CT)10ggagaaggggaatcacatggaaccgagatttgctgttttcaattttatgtgctaagctttttaaaccaatgcaaatctgccacgtgtattacc(A)11	124	-	TGCAAATCTGCCACGTGTAT	AACCAATGGCATCCCACTAC
chr1	23356150	23356538	c	(A)17cccatcttcaacttatgatgtcacctttgaaggacttaatttgcttttaggag(T)19	89	-	TTTCACCACCAAGACCAACA	CCTGCCAAAGCAAAAGAAAA
chr1	23385540	23385929	c	(T)11cctgaaatgttttaagtgttttgtttcagttttgggtatctatccgaaatcctcataaacaaagaaagg(A)10	90	-	GGGCCTATGTCCCTTTTTCT	TTAAAGATGGGTCTGGTGGG
chr1	23395208	23395602	c	(GA)10aagagttgtgtgggctctgtcgacggagaagaggagaagatctgtgc(GA)14	95	-	CTGTCGACGGAGAAGAGGAG	TTTACCGAAAAACGGCTCAG
chr1	23395936	23396377	c	(T)12aaatgtgggatttggtacagaatagaatttggtaattcataaatgtaaaagtatgagatttgatgataagaacttgattttatgaattttcat(TA)8(T)21	142	-	CGTGACTTGCATCCCTAACA	TTCTGTACCAAATCCCACATTT
chr1	23418651	23419073	c	(G)16agttggtagtcaacatgtcatatgatacagagtcctatatatggatgaagtaattttttatttttatgtgaatttgcaaaattgttagatgatgt(G)12	123	-	GGGGGAGTTGGTAGTCAACA	TAGATGGGTTCTCCCTCCCT
chr1	23423248	23423651	c	(AG)6acgcaagggagataatttggataagacaaaattcttttggaatagttctcaagaagtggaggtggaccttgagagtatga(GT)6	104	-	GGGGAGGTGTTGGTCTTGTA	GGTCCACCTCCACTTCTTGA
chr1	23423475	23423854	c	(AT)22(AG)18	80	-	GAGCAGTCTTTTGGGTATCAATG	TGAGCAATGACTCCCTCTCTC
chr1	23424002	23424389	c	(AT)6tgaaaaatgttttgtacaatgttttgctcattgttaggcaaaagttggtgtggcaatataatctct(A)10	88	-	TTTGGTCAAGCATTTTGCAG	ATTGCCACACCAACTTTTGC
chr1	23430647	23431045	c	(T)10ataggtaaagacatttcaaagaaagaaactaacaacaaaggaggttgagaagatgaaacccaaagaagacaag(A)16	99	-	TAATGGGTTTCGAATTTGGC	TTCCTTCAGGTGGGATTTTG
chr1	23448877	23449240	c	(A)11ccaacaaaagctgtctctctgtatctctgtctc(TG)10	64	-	TGTGTGTGTGTGTGTTTCCG	TTAAAATCCATCACCCTCGC
chr1	23466183	23466541	c	(G)15cctcccatgcattaagtaatttttacttt(A)15	59	-	GGACAAAAGTGACGGTGAAAA	CGCCATGAATCCAAGAGAAT
chr1	23477598	23478089	c	(T)15gactgatatattcttcaaaattgttaaattcaaattttagtgaactgttcatttaaattccgaaaatggtaatttttggaaaaaattaaaacgtaa(T)10acaatcatttaccaagcctaaagtgtgaaaaatattgttattttataaatt(A)20	192	-	CCGAAAATGGTAATTTTTGGAA	CTTTTAGCGTGAAACAGGGG
chr1	23496935	23497345	c	(CT)9ca(CT)7ca(TC)6gtctctcgtctctcgtctctcgtctctacgatccaccgccaacga(CT)9	111	-	GCTCGTGTCTCTCTCGCTCT	ACCTGTCGCAGGTCGTAGTT
chr1	23505270	23505727	c	(CT)10(CA)7cgcagagtctcggatcgaacacaacccttatcttgtcaatctccttctcggctcactctcagttcttcgatagacttcgccgttatctgaggaagtta(TC)13	158	-	ATCTTTCTCGATGTGGCTGG	AGCCGAGAAGGAGATTGACA
chr1	23523581	23524004	c	(TA)6agagagaggcacctttgattaattgtacgttacatcatgagtgtttattgggtagagtaaacggtgggcatgcaacaaaattaatgtgacactttgtgcc(CT)6	124	-	GAAGTTTTGGAATGGGCTGA	TGCCCACCGTTTACTCTACC
chr1	23542209	23542608	c	(T)17cctttctttttcttctgc(T)10ctccctttctttctttctttcttctcttcttttctttcgtttcca(T)10	100	-	TCTCTTCTTTTCTTTCGTTTCCA	GGTTTCCCACTGCTCTCTGT
chr1	23552624	23553025	c	(A)11caagagtcacagattaacggttgataaagatcacaaacaatcagtttcgaatttaccttagtagcct(TC)12	102	-	CCACAAAACCAATTCCCATC	GCTCTCTCCGTCTCAGCCTA
chr1	23582780	23583187	c	(A)16tccatcgcaaaactaaataatttagtagagcatacaagccagattatagaccaaattttgatactaaaattaaaaaa(AAT)5	108	-	TGCTTGGTTGTTGTTTCTGG	CTTTGCCTCAGTTCTCTGGG
chr1	23628268	23628655	c	(T)10ctacaatacttcattcagaaactacaattgttaacagagagaatcatctataaaattaag(T)18	88	-	TTGTTTGGAGGCTGTGAAAA	TTGTGGATTATCACCCCAAG
chr1	23715173	23715533	c	(TA)11aaataagaaaaagaaagaaagaa(AG)8	61	-	TCCAATTTTGGATAGGCACC	CATTGGAACCACTAGGCACC
chr1	23720549	23720909	c*	(TA)10aaat(AAGA)6(AG)8*	61	-	TCCAATTTTGGATAGGCACC	CATTGGAACCACTAGGCACC
chr1	23729663	23730039	c	(AT)17a(AT)21	77	-	CAAAGGCATTGGTTCCCTAA	CAAACGAGCCTGACAACTCA
chr1	23731098	23731521	c	(T)10aatgattacatcataacttttgatttacaactataatttatgcacttttgggtatttcgaagagattaattaagtatcaaaatttg(A)15tg(A)11	124	-	CATGAATGATGAATGGAGAATGA	TCGAAATACCCAAAAGTGCAT
chr1	23746635	23747042	c	(A)21ctaagaaataactccaattctactttctcacaaattatcatctgcttttttgtttagatctcaaccgtcca(T)16	108	-	CTGCATTCCAACGAGAATGA	GGCATTCGACGGTGTTGTAT
chr1	23764072	23764435	c	(A)11gagaaacatagatagatagatac(AG)15	64	-	GCTGAGTGTGCAGAAACCAA	AAACGTGGTCATTGCACTTG
chr1	23770455	23770903	c	(AAT)6cgaaaaacaaa(T)10aaactttatccaaggttttgaaaatggaccgaacttccacataactcccaaacttacaattgaaattcaactgtgaaaaataaa(T)12ggga(T)10	149	-	GAAAATGGACCGAACTTCCA	CACTAACGGTCTTTGGGCTC
chr1	23778272	23778690	c	(T)10atatataaaaaaaattcagttttgtgagttctttcggtttatatatattttttaaaattaaagataacagcggataatcgtttacgcagctatagag(TA)6	119	-	TCATTGTTTTTCCCACCCAT	TCAGCCCATTCCAAAACTTC
chr1	23779681	23780095	c	(CT)8tgttttcattgccgtctgttggtggttgtgagaacacttcgaaaagcccgattggaacatccggtaaga(TC)15	115	-	AAGAGGGCGCGAAAAGTAAT	CTCACAACCACCAACAGACG
chr1	23792234	23792641	c	(A)10caacttacagcaacggatgatgagataagtaaattattttattttctaaaaatctatctattgcagcgg(AT)7agagg(A)10	108	-	GAAGTTTTGGAATGGGCTGA	TATAGGGTCCCGTTCAGCAA
chr1	23798792	23799212	c*	(GT)11(T)11*aatgttgcatccaagtagatattgatattgaatgaaatttatttattatttaaagttgctttttcatttctagg(T)15	121	-	AGCTTGTGAAGCTCATGCTC	AACACACACACACACACACACA
chr1	23802407	23802760	c	(T)14aaatcatgatttgcagccatcaagtggtga(T)10	54	-	ATTTGCAGCCATCAAGTGGT	TGCATCGGACAAGTCATCTC
chr1	23824508	23824929	c	(C)19aattttattgcaattgtgctgagcatatgctttcaatttcatagcttagagtagaagggaaacaatggctgggctgtcagggaagaaaatgac(A)10	122	-	AAGCCCACAGCCTTAACCTT	CTTCACCCCAGGTACCAAAA
chr1	23846213	23846593	c	(T)10ataaaaaaaactactaaaacttttagagaaacaaatttggattgaagacatcaa(T)17	81	-	TTTTCTTGGTCATCTTGCCA	TCTTCAATCCAAATTTGTTTCTC
chr1	23865866	23866285	c	(A)18gttcaaaacaaagttatttttcaccattgaatttagtttacagttgtgtgactttaattttagtgatggtattttatatttgggtgaagaa(G)11	120	-	AACATGGCAACATGGCTACA	CCCCCTTCTTCACCCAAATA
chr1	23906881	23907259	c	(TA)13t(TA)6atatatatatctatatat(TA)11	79	-	TCTCATATGGCCCTTGAACC	CTCACCAAAAATCAGCCCAT
chr1	23907935	23908293	c	(TA)7(AT)9aatatatat(TA)9	59	-	TAGGGTGCTGAACATTTCCC	TGGTAAAACTAAGGGTGGCG
chr1	23922222	23922638	c	(ATG)7atatgagccatagcttgggtgcggggcgtagggactagtcaggatgcgcgcaagctggcccggatacccttcgttatc(A)18	117	-	GAAGTGGCCAAGTTGGTGAA	GATAACGAAGGGTATCCGGG
chr1	23927057	23927446	c	(TC)13(TA)32	90	-	AAATGGTAGGGTGCTGAACG	GAAGTTTTGGAATGGGCTGA
chr1	23943131	23943555	c	(A)10tttgggctgccttttggtggagttgtattatggttgaggagtgtatagggcttgttcatactgcattttgatagctccaccccaaaaaaataaat(ATAA)5	125	-	GCCATGAATTCGAAAACTCC	ACAACTCCACCAAAAGGCAG
chr1	23966195	23966550	c	(A)10gactttttatgtgaataccaaacctcaatt(TA)8	56	-	TCGAGGCCTACTCCAGAAAA	TCATGAAATTTGATCACCATGA
chr1	23969178	23969532	c	(TC)8tatctaaattgaatcaaatctgtaatggg(T)10	55	-	TTCGTTGCCAAGACCTCTCT	TATTCCATATGTCCTGCCCC
chr1	24014181	24014589	c*	(T)15(TG)8*gattttattgagatcatttgtaatgaaccatgtgttcattaaggggattaatgttcattaa(TC)9	109	-	TTTTGTGTGTGTGTGTGTGGA	AACCATGATCCCCGTTCATA
chr1	24017291	24017700	c	(TA)42tcttatttatatgttc(T)10	110	-	TGCAGTAGGGGTAGTTTGGTT	GAAATCACATGGGTTTCTTGA
chr1	24030738	24031102	c	(C)14aaatgtattatatagtacggttcaaaaaattatatg(T)15	65	-	TATTTGCAGTGCGTGGGATA	CAAATATGTTGGGTTGCGTG
chr1	24031660	24032040	c	(CT)6catacacacacacaagcttgagctcaagggatgttcatatattttgttggatttc(T)14	81	-	CGTAGTGAAGAACAGCAATTGAA	TCGAAAAATCCCGGACATAA
chr1	24035727	24036112	c	(A)11cgttggacaatgctaacgtcctcttgaagtatcacattgaagtattggacgttaacattcc(AT)7	86	-	CGTTGGACAATGCTAACGTC	TCCTCACAAAATCAACCCATT
chr1	24048027	24048395	c	(TC)14tagtacagaacactaataagtttaga(AAG)5	69	-	TGAGGAAGACGCTGTGAAGA	ATTTGTCCGCAATTGTTGCT
chr1	24049472	24049871	c	(A)10ttaactcattttaagttataattgataatttatatgaaaaattgaagaattttatataacatgcatttatttttaaat(A)12	100	-	TCGAGTACCCGTGAATAGAACC	TGTCAATGGGTAAACATTTAACGTA
chr1	24050358	24050772	c	(T)11gattgattgagagatgctgattttagtttttttttagtttagtttataagtttatatgtagttttgtggatttggaatccttttaattaat(A)13	115	-	TTTGTGGATTTGGAATCCTTTT	ACCCTAGAATCCCTTTCCCA
chr1	24066067	24066502	c	(A)13ctaaaaaataccaaaagagctgaaatttgaggaaaaatcggtattcattaccttcacatccggcgcacgatataaaatactgctaacatgcgccggag(A)10tct(AG)6	136	-	AAGAGGGCAGATCGCAGTTA	AGCACTGCGACAACAATGAG
chr1	24083160	24083669	c	(T)11aaattcaatgacacatcgcttaatttggagaattgcttattaattctatgaatcatcaatcattttttcaccaaacttt(TA)9tttt(G)19acatgatcatatatatataccaaaaacaaaaatgtgaaatgaggatgcatgttctctgccttacatgat(A)10	210	-	TTAAGGCTCGGCTTGTCACT	AAGGCAGAGAACATGCATCC
chr1	24100328	24100723	c	(T)10cttccaattccaaataaatagaggtacaaaagttataaaaggtaattttaaataaatcaagtacacctaaaac(T)13	96	-	GGGGGTAATTTTACGAACAAGG	GGGTATCCCCTATATGGTATTGAA
chr1	24107534	24107934	c	(T)15cactattggatttaaaatttaaatctgaaaactcaatattttccattttcaaattcaaggccctgcccaaa(T)15	101	-	CATTTTCAAATTCAAGGCCC	GAAAAGGTTGCATGGAAGGA
chr1	24118994	24119389	c	(T)14gtcactattggttttaaattttaaatctgaaaattcaatattttccattttcaaactcaaggtcctgcccaa(T)10	96	-	TGGGGTTATATGGACCGAAG	GGCAGGACCTTGAGTTTGAA
chr1	24119472	24119895	c	(T)12acgaacaaagtatctggttcacatgcatttttcaaatttacttttaaagttttttttcttccaataccaaataaatacatttacagtacacttgatacc(T)13	124	-	TAGTTGTTCCCCAATCCCAA	TTGAAAAATGCATGTGAACCA
chr1	24149062	24149489	c	(TA)8aattaaaaattaaaggaaagatacaattagacataatttacttcaacttatataagttcgaatatcaacctctctaactttagggattctaataaaaag(A)13	128	-	GGGTGCTGAACATTTCCCTA	AAAGAACGGTCAGGATGTGG
chr1	24155913	24156312	c	(T)20gcactttttttaaaattctcaatatcattatttgtactttttaatttatcaaatgttttttcga(T)16	100	-	GGGGGTGTCAGATTATCACG	CGTAAGGGGGTGCATCTAAA
chr1	24159541	24159949	c	(TCA)5tcttctcatcatgcaactctagtaccccccctgcacgcgcaccgattagaaatcttgaggtcactccagcattattcc(A)16	109	-	TTCGTTCTAGCGAACCATGA	TGGAATAATGCTGGAGTGACC
chr1	24188127	24188514	p2	(TA)44	88	-	GCGATTGATGTAGTAAGGGCA	CGGTCTATACACAACTGGCG
chr1	24188641	24189013	c	(C)15tgcacgcacattgattagaaatcttaaggtcactccagcattattcc(A)11	73	-	TTGGTTCTAGCGAACCATGA	TGGAATAATGCTGGAGTGACC
chr1	24192915	24193284	c	(A)10tacatacatagagactcaatgttttctcatactctaacaacaac(A)16	70	-	CCCACAAAATCTCTACACCCA	TGAGGGTGATCTTCACATGG
chr1	24193817	24194170	c*	(AG)19(G)17*	54	-	TGTTGACAGCCCTACATCCA	AACATGCCCCTTAGTGGAGA
chr1	24201627	24201978	p2	(CT)26	52	-	TCTTTTCTTCTTCCCCACCA	GGTTCGAAAATCAAAACCCA
chr1	24213199	24213548	p2	(TA)25	50	-	GGTGTGCCAATTGAAGCTCT	GTTTGAGTGGGGGAGACAGA
chr1	24219571	24219951	c	(T)11aatataagaaaaacgaaggatagaattttatctcattaatgtatatttattttttaaatt(A)10	81	-	GGAACTAGTGAAATTGCAAAACAA	CATAACTTGCCCCAAACTCA
chr1	24233966	24234353	c	(A)12taaattttaattttttggtcaaattagttttcatttctaccgtaatcaatataacggttatgtc(A)12	88	-	ACCGTTCCAAATCTGCATTC	CGGTTTGTAACCGATGTCTAAA
chr1	24240684	24241142	c	(T)10caaagatcaaatcaaatttatgatacctaccactttcatttaaattcaacc(A)17caccaatacaatttattctcctatcaaagtaactatgacaaaaaacctcacttcgattttttttgttt(A)13	159	-	ATCTGATCACCTCGGCAAAG	CAAAATGATGCCCTAAATGATG
chr1	24246199	24246553	c	(TA)6catgattcataataaatgaaaa(AAT)7	55	-	TCCTCGTCAGACAAATCATCC	ACATTGGGAGTAGTGGAGGG
chr1	24267486	24267874	c	(AAT)5ttatgggagaatggttcatggcataacttcaaactagtaagagtttcttttgaattgaa(T)15	89	-	GCAAATTGGACTCTCGGTGT	TTGTCCGTAGGCCCTAGAAA
chr1	24279430	24279817	c	(TG)6gttattttgatctgttcattttaatacatttgcttcttttattcagtttttattttgatcttac(T)12	88	-	TTGGAAATTGGGTTGGAGAG	TGGCTTCAGCTTGAAAATCA
chr1	24291808	24292192	c	(C)13(A)22ttaataataaataaataaacaaaaaaataaaaata(AAT)5	85	-	GGGCCAAATGTGAGAATGAC	TCAAAAGAACAGCCCCATTC
chr1	24305079	24305523	c	(CTC)5ttt(TTC)5tttttcatattcatctccttctagggtttgtgagaggtaaatcaatggagattaggttttaggttttttttcaagttatcttatttctttgatttaa(T)15	145	-	CACATCGAAATGGCTCAATG	AGGAGGAGGAGCAAGGAAAG
chr1	24338512	24338884	c	(T)11cttggggttgagagtgcatgtggtggtggtt(G)31	73	-	TTGAGAGTGCATGTGGTGGT	CCAGACAATAGCGAAGGAGC
chr1	24346279	24346680	c	(TG)6cgtgtgtaagataaagaaaagcattcatgattcaaatattcaaactttagatggttagaaaaatcgaaccaaattgat(A)12	102	-	AAACCAGGAGGCAATGTCAG	ACACACGCACACACACACAT
chr1	24348649	24349011	c	(CT)7cgcactccaactctctcgctgctattccctt(TC)9	63	-	TGAACGGCACAGATGAGTTC	GCGAGAGAGAGAAGGTCGAA
chr1	24365754	24366141	c	(A)10gattgaaactcaagcctttttatgttgagtttagtcccacattggacactcattacct(TC)10	88	-	TCCCATCATTCTCAAGGGTC	CTAGGCCAAAGGACATGGAA
chr1	24369162	24369580	c	(AAT)5agtgaaaaagctttgccttccacatcaccttatggcatctaaaaacatgatccgatgccatatgattgtataggacaaaattctacgaactttg(A)10	119	-	TTCCACATCACCTTATGGCA	AAGTTGCACAACAGTAGACTTAGCTT
chr1	24370238	24370659	c	(AT)6ctaatgaaaattcaaacaatcaaattattatcatcaaatctcatttctacatttatgaattaccaaattctattatgcatcaaatcccacattta(AAT)5	122	-	TAAGTCGGCAAGCGAAAACT	GCAGACTTTTCCCCCTTTTT
chr1	24372367	24372782	c	(GAA)5gttattactgatttggaatttgtgagggcccgaagtactttaagctttcttcgcacggccatcctcctttgcaaccttgacacca(TC)8	116	-	TCCTCCTTTGCAACCTTGAC	GATCCACCACTGCCCTTCT
chr1	24425377	24425731	c	(T)10attacaaatactattcc(A)28	55	-	TATGCTGTCAGTTTTCGCCA	AATTATTGGTTGGTTGGGCA
chr1	24427232	24427585	p2	(GA)27	54	-	AAATCACTCCGACTGGTTCG	AAAGGTGGGTTTCGACTGTG
chr1	24433283	24433684	c	(T)12ataaagaaattacctttgacatgagatcaaaatttatttttttatagtgtcaaaatgatctcattgataaagaactt(A)13	102	-	TCAATGAGATCCTTTTGGCA	GCTAATGGGATCCTTTCGAC
chr1	24451003	24451361	c	(T)13caaaattatgtgagatggtttttgggagga(AT)8	59	-	TATATGGGTCGGGTTCCGTA	TTTGCAAGGATGATTCCCTC
chr1	24455064	24455422	c	(A)15cttacaaattagcctaatttacctggtattag(T)12	59	-	GAGAGATTTACGGGCAGACC	TCATGTGGGACAAACGATGT
chr1	24461394	24461781	c	(GA)7ggcagagagtgagaagtcgatcgatcgactgtgagagaaagacggagagaaacagt(GA)9	88	-	GGAGACAGGCAGAGAAATCG	TTAAATCCGAAATTCCACGG
chr1	24462266	24462648	c	(T)19gttgtaggcattttgtgacaaaaaactaattcccaaaagtgtatttaatgtaa(T)11	83	-	AAAACAGGATCAGGTCGGTC	TTTTGTACGATTGGGATGGG
chr1	24475342	24475702	c	(TC)10ttggttccttgaaacaaactcttctcaaatg(T)10	61	-	GAGCTTTCTTGCGAATCACC	GGTGAGTGAAGAGGCGAGAC
chr1	24476899	24477350	c	(T)18ggttgagtaagctggagtgctggacttggagatgagttcaacactaccaatggcgatccgtaaataagaattgtatacaaaaggaaaaggtgactg(GT)9gagt(GA)8	152	-	GTTGAGGTGGCACAAGACAA	TCGCCATTGGTAGTGTTGAA
chr1	24485965	24486339	c	(A)12cagcaatgtatggtttatttccacaaaatttaaattggctggt(TTTA)5	75	-	TCGCATCAAAGAACCCTAAA	AATTTTTCCCTTGCCGACTT
chr1	24503347	24503702	c	(GT)16(GA)12	56	-	CGTGTGTGTGTGTGTGTGTG	ATATTGGGAGCAAGTGCAGG
chr1	24510743	24511126	c	(T)13gaaaaaggaattgttcatcaaaactcttgtgtcgacacttcacaccaaaatggtttggct(A)11	84	-	TGTCGACACTTCACACCAAAA	GAACGACTTCACCCCAAAGA
chr1	24536957	24537312	c	(CT)19(CA)9	56	-	TCCATAGCCACCCTCTGTTC	ATTGAGGTTGAAGTCGACGG
chr1	24554945	24555505	c	(T)10atttttgcaagctaacaatacttgttgtgtttgttgtatttattttttaggtaggtttcctttatttatttactcgcttg(A)13caaaaaatccgattttcactttatttctccgattatgtcattttaagcatgcgtatcatcaaacaaataaa(T)10cttttttggcccaagccaaaaaccagaggcaatgtgcctcaaaatgtgtataaaaaaataaaaaaat(A)10	261	-	CCAAAAACCAGAGGCAATGT	TAATCGGAGATCGGACGAGA
chr1	24555557	24555922	c	(A)12ttaattaaaaaaaaattaattaaatt(A)13(T)15	66	-	CCAAAAACCAGAGGCAATGT	TGATCAATCAAAAAGTGGCG
chr1	24577211	24577564	c	(TG)12(AG)15	54	-	TCCGTTGGCTTAATCGTTTC	CCAGTCAAACCGGACTTGTT
chr1	24608498	24608869	c	(T)10gttgttgcatgagttgaagtt(GA)8tgcagactac(AAG)5	72	-	GAGAGGCCTAAGAAATAAGGGG	AGAAGCTCCACCATGGCATA
chr1	24611951	24612419	c	(AT)8aaaaggaaatgctaacgtctaagatttcatagggtattattaaaaaacataaagtagtggagaatgctaacgttcccataagatcttgaacgttagc(AT)28	169	-	TCAGCCAATTCCAAAACCTC	GGGAACGTTAGCATTCTCCA
chr1	24613099	24613450	p2	(AT)26	52	-	AAGCACGTGTTTGCCTACAA	CATATTCGTTTCCCAATGGC
chr1	24615619	24615997	c	(T)11gcactttgtatatacttttatagttttatttggtaatctctctcttccttttgtattt(A)10	79	-	TGATAATCCCAATGCTTGCTC	GCCGTTAATAGTGGCTGATGA
chr1	24619024	24619471	c	(AT)26ttaaagtgttggctaatggttgtttgggagaatgacctaattaccgattacctcaaaataagttctttgagagaattttaaaaaga(T)10	148	-	GGCTAATGGTTGTTTGGGAG	CTAAGATGTGATGCTCCCCC
chr1	24620993	24621344	c	(A)13ggtgagttcaccagtaacgagggaccatt(A)10	52	-	TTCACCAGTAACGAGGGACC	ACCCTTGTGGAAGGGTTTCT
chr1	24635494	24635915	c	(C)43acc(CA)15cgcaacaatagctttcaactccctaccttccaa(T)13	122	-	ACACACACACACACACACGC	GAGGGCAAATTTCCATCAAA
chr1	24636047	24636425	c	(A)15tttgacaatgaaaaatttgactccaattcaacctcttggtccgtcgaaaca(C)13	79	-	CAATTCAACCTCTTGGTCCG	TCCTCGGCCGTATAATCAAC
chr1	24644245	24644673	c	(AT)9acatatatatgtatctatatatatacatatatatgtatatatgtatacatatgtatgtatatatgtatacatatatacatacatatg(TA)12	129	-	CTGATTTTTGGGGAGGATGA	GGGAAATGTTCAGCACCCTA
chr1	24644739	24645100	p2	(AT)31	62	-	GCGGTTCGACAGTCCTAAAG	GCTGATTTTTGGTGAGGATGA
chr1	24665921	24666270	c	(TC)7atagat(TC)15	50	-	TTTTGTTCAGCCATGCAATC	CGGAAGCCTAACTCAGTCCA
chr1	24680632	24680995	p2	(AT)32	64	-	CTTCATGCTTGTGCCGTAAA	TGGTAAAACTTAGGGTGCCG
chr1	24681760	24682123	c	(CT)10ttttctctctctctatagttacagctccca(TC)7	64	-	TTTGTTTTAAGCCCCTCCCT	CGACGAAGATGTTCGGTTCT
chr1	24682204	24682607	c	(T)17gttgtagttgttacgattgtaatttttgtaattgttacgatttgaagaagagggttcttcttacttttttttcc(T)13	104	-	TGTTACGATTTGAAGCAGCG	TTGTTTTGGGATTTTGAATCATC
chr1	24686973	24687383	c	(A)11tttaaaccaatcgttttcctccatcagttattttcctaagaattgagagtgaaagaaatacctaagaatcgttcgaactt(GA)10	111	-	GAGACGACAATGGCACTTGA	CCGCCATCTTCTTCACTCTC
chr1	24698758	24699159	c	(A)14cccaatgaaaagggaaaaattatgggacaatagtcttgtaatatcttccactcataaataataatattgcaa(AT)8	102	-	GAAAAATTGTTGGGAAGCCA	AAAAAGGTGTGTCGCAAAGG
chr1	24704102	24704504	c	(T)10aattcttagccatccttagacctcatctcccacatttttcacaattgaatgccttaattgttcgaactcatcgttttcattt(A)11	103	-	AACTTAAAGGACCCTTGCGG	TCTTAAATCCGTTCCGATGG
chr1	24709157	24709576	c	(C)14tacacactttttcatacctaaatctatctttgtgccatgtaccctggtgttatctaaaatctccattgggagaaaatggttatatatatgtatg(TA)6	120	-	TCTCCATTGGGAGAAAATGG	TCAGCCCATTCCAAAACTTC
chr1	24711622	24711983	c	(TA)12(GA)19	62	-	GCCAAAATGTTTTGTGCTGA	CTTGGCAAACTTTAGGGCTG
chr1	24713923	24714313	c	(TA)9attaatctcctcctctttctcttgcttattaatacaattctctctttttatttat(TTA)6	91	-	CCAAGACGTTTTCCTACCCA	GAAGAGGGAGCTCAAAAGGG
chr1	24718061	24718513	c	(AG)10ggggagagagatggatgaaggagagaagaggatgagatggtctctcaaaggaatgactgccctcgtaactggtggtaccaaaggaattggg(TC)11atat(AC)8	153	-	CGACGAGGCTAAGAGGTTTG	CCAGTTACGAGGGCAGTCAT
chr1	24743600	24743981	p2	(AT)41	82	-	CAATCAATTGAGCGAGATGC	CGAGGGCTCGCATTAAGAT
chr1	24745822	24746184	c	(GA)6tgagatcgagtggttgagggatcgactgtgagagagagt(GA)6	63	-	AGTGGTTGAGGGATCGACTG	AATGTCGCATTTTCCGTCTC
chr1	24767199	24767618	c	(T)10ataaaaaaaatttattatatatccttcaaaaataatatatgaagacggaatttatatccactactgtaatttgttttcatatatacatac(AT)10	120	-	ATAATACATATCGCGGCGGA	AAAAAGCGTATAGCAGCGGA
chr1	24790066	24790438	c	(T)10acatacaagaatgccacattatttaatctccaacaatctttagctttc(A)15	73	-	TCCTGAATGTTTCAGCCAAA	TGTACCCGTGACTTAATGGGA
chr1	24813181	24813576	c	(T)15ccaaatttataattatgactaagatcaacgggggatttcctataaataataatctgggacaacaac(A)15	96	-	AGCCCAACGAGAGAAACTCA	GTAGCTCCGCAGATCAAAGG
chr1	24835761	24836136	c	(A)15ggagcattaaattatcacaattccatttatacccgtgagattgtcacttt(A)11	76	-	GGTATATCCCAAAGCAATGGA	GAAGAGCAAGATGGCAGGTT
chr1	24836539	24836930	c	(T)12cttttccaaatttataattacgactaagatcaaaggggctttcctataaataataatccgggac(A)16	92	-	AGCCCAACGAGAGAAACTCA	TGAAAGGTTCCCTCCAAGAG
chr1	24858538	24858909	c	(A)11ggagcattaaattatcacaattccatttatacccgtgagattgtcactt(A)12	72	-	CGCTCCTTTTTGGTAAGCTC	ATGAAGAGCAAGATGGCAGG
chr1	24859337	24859730	c	(T)13cttttccaaatttataattacgactaagatcaaaggggctttcctataaataataatccgggac(A)17	94	-	AGCCCAACGAGAGAAACTCA	TGAAAGGTTCCCTCCAAGAG
chr1	24869957	24870348	c	(A)13cgttatgttttttgtgtgcatccaaacaggttctaaaggtgatatggtagccttttctttttattc(T)13	92	-	TTGTGTGCATCCAAACAGGT	TGCATAATAAATGGCATGGG
chr1	24876697	24877114	c	(AT)7tggcttgatctaaggttttaaaaatggacagctaacaaacttccacttaactcaaaattttaaaattaaaattcattggcgaaaataac(T)15	118	-	TTAAGGGTTGCTCAAATGGA	CTTGTGGCATCAAAAACATGA
chr1	24886624	24887042	c	(TC)16cgtgtctcttataaattccaacttctcgtctagacatcaacacccattaacgcattttttttaagtctt(TC)9	119	-	AAACGGAAATCAAATTCCCC	GAGACCAAAGCGTGAATGGT
chr1	24909560	24909934	c	(T)16gtaatattcatcgatcgatcaaacaacattctcatcgacct(CTA)6	75	-	TGTTGGATTTGCTTTTAGCG	GGAAGTTACATCCCCGAGAA
chr1	24930823	24931193	c	(A)12ttacaaagacacagattatagagctaattgtgatccacaaacaattg(A)12	71	-	AGGAAGGACGGGTCAAGAAT	ACCTTTCGGGGTAAGGCTAA
chr1	24968116	24968496	c	(T)13aaatatctacaaaaataaatatatcttatttcataaaatcatttttgaggaa(AT)8	81	-	CGGTTCGTGATACACGATTG	TCTATCGACTCTTTGACGTGGA
chr1	24980057	24980482	c	(TC)6tt(TC)8catcgttgtctctgctgctgcgacggtgggacctgcaacctgcggctgccatcggcacat(CTCC)6(CT)6	126	-	GCCACCAGTTACAACCGTCT	ACCCAATCTCAAACCTGTCG
chr1	24982300	24982683	c	(A)13gacttagaagatgaattaacaaagaaaaattccacaaattcgaactcatcattctccttt(A)11	84	-	CCCTATCTCTCCTTCCAAACC	GAGAATAGGGGGAGAGGGAA
chr1	24992958	24993327	c	(ATT)9tcttcttcttcgttatctgagcaatattttgta(T)10	70	-	AGAGGCTTACGCCTTGAGGT	ATGTGCATCATGGTTTGTGG
chr1	25002634	25003076	c	(A)11ccctaaaagacgacacggggacacggagataaaaagaaatttgaagggaaagttagggttccttacctgtagagtgtagacttcagatccgaatccgc(CT)17	143	-	TGATCCAAGGCGATAAAACC	CGAGTCCCAAAATTTCCTCA
chr1	25009303	25009674	c	(T)12gccttcacgtgaacctcaaataaaagctcatac(TTA)9	72	-	TTTGATAGGAACGAGGACCG	GCAAATGTTATCACCCATTTTG
chr1	25010495	25010912	c	(A)10cctttgagcttgattgtaggtgttgaaaatggtggctactgaattcccaaatttaaaactaaaattaaataatgaaaaataactttaatttttcta(T)12	118	-	GGTGGCTACTGAATTCCCAA	GGCATCCAAAAACATGATCC
chr1	25019321	25019738	c	(T)12aatttataaaaaatatatgtaaattaacaaagtaaagtttctatccctcgtttttcttatatt(A)10tatcaatatttaaaaaaa(T)15	118	-	ATTGCCCCAAACATGTCAAT	TCGTGAGATAGAATCCTACTTGGAG
chr1	25029014	25029437	c	(T)20cccatatgtttgaatacataatgttgctaaaataaaataaaaaaatgtatgtttatcttggaccatcattgatgatttaatatttctctcttt(G)11	124	-	TTCGAAATTTACTGGGGCTTT	TCCCTACGACATACATGCGA
chr1	25033482	25033895	c	(A)10tcagtaatcaagagagtagagaaaaatatacactcaacaataaaccctgttaaattattttattgaaccttattttgaatttttaagaaattaa(T)10	114	-	AGTACCTCCCTTCTACGGGC	GAAGCGAGAAGAGAAGGCTG
chr1	25054315	25054736	c	(T)14caatagaaaacctttattgtgttgaatgttattttaattaaattatttcttcttctcctttctccatgttgagttgcttgtgtgttgtgagtgcga(T)12	122	-	ATGTGGGAGAGTTGTGAGGG	CACACAAGCAACTCAACATGG
chr1	25081760	25082142	c	(ATT)5atattaaaatatactaattaagtaaaagatttgttatttatatttccatatatg(TA)7	83	-	TGTTGCATACCACTACCGGA	TCAGCCCATTCCAAAACTTC
chr1	25084451	25084829	c	(TA)6tgttgccattatctcctcagtgttactcttaagttagtggttagagattgaagt(A)13	79	-	TCAGCCCATTCCAAAACTTC	ATAGTTTCGTGGAGGCAACG
chr1	25103955	25104326	p2	(TA)36	72	-	GATGATGCGTTGTGAGTTGC	TCCATGCATAATTGTTAAATTGG
chr1	25154548	25154913	c	(TC)16(TA)17	66	-	CACGTTATTACGACCCCCAT	GGATGATCCCCTCACCATAG
chr1	25157200	25157585	c	(T)12cttctaatattcatggcttgaagaaaggttcatggtgagattctaggcctaggcgat(A)17	86	-	GGTCGTTGATTTCAAGCCAT	TATCCAATGGTCCACCCCT
chr1	25169707	25170205	c	(CA)9tatatatagggtcaggttcggcagccaaccaatgttagggagccaaaatttgtcctatatgggttagaagttttggattgggctggttcat(A)13caatcagcccattctgaaagttcttattaaccccattaaataaatgaacttcctttga(T)19	199	-	AGGTCCTAAGAGCCGAGAGG	TTTTGGCTCCCTAACATTGG
chr1	25174041	25174424	c	(A)12tg(A)10gaaaagaaaaggaagaagatggattttggtgtaaaaaatggag(T)17	84	-	GTTGGTCTGGGTTTGCCTTA	CCAGAACAACGAAGTGAACG
chr1	25198165	25198526	c	(AT)9tcaaatgaatacaaataaaatgatttttct(A)14	62	-	CCCAGCCACGTTTTTGAAAT	AGCCTTCTTGTGACCCTGAA
chr1	25204992	25205394	c	(AG)6aaggtgatcggagacggagtcgacagcgacggcgatggtaacgacaatgatgatgacgacggtgaggttaatggaa(TGG)5	103	-	ATGGTGGCAAGGAAGAATTG	TTTTCCACCCCATTCAAAAA
chr1	25209844	25210194	c	(TC)6ttccttcccaaagacataattaacaca(TC)6	51	-	GCCCCAACCATAAATCCTCT	ACGGTTGAGTTTCAGCTGGT
chr1	25222367	25222756	c	(TG)9gattggattgaaattatctaaacaagtctaaacaatttctaattttaattttaattg(A)15	90	-	TGTCGAAAAGGATTTAAGAAGGA	CCAATCCACACACACACACA
chr1	25234764	25235388	c	(A)14caaatccaatttacaagacaatgagctaaaccacattcaacaaaacagagaaaccccattaaataaattctcccacggaattccaaactcttaccattc(A)10tttggaaaaccaataagctaaaaccacattcaacaaaacagagaaaccccattaaataaattttcccaaggaatcccagaacccttgccaat(A)10tggaaaaaccaatgatccaaaccacattcaacctaagagagaaaatccattaaataaattctcccaaggaatcccagaacccttgccaat(A)10	325	-	CCAGAACCCTTGCCAATAAA	CTGGGATTCCTTGGGAGAAT
chr1	25255878	25256252	c	(AAG)5cagaagagacagacatggttggtgaagcttaagaagagtataagac(GA)7	75	-	TGGGTTATAATGGCGGGTAG	GCTTTCACGGGTCTTTGATT
chr1	25263889	25264282	c	(T)12cacacaaaaagcacaccatcctgattgcttatctcaaaaacaggggtcgtgattgctccagcca(AAT)6	94	-	AAAAACAGGGGTCGTGATTG	TGAGAAAGCAGTGGTCAGGA
chr1	25269338	25269705	c	(AT)7ctatatatataattattatttttttttaattttttttggga(G)13	68	-	GTAATCCAACACCACAGCCC	TAGCCATCCATTTTCATCCC
chr1	25286148	25286507	c	(TC)14(TA)16	60	-	GGCATTGACCTAATCGTCCA	TTCCATGTTCGTTCCTTTGC
chr1	25313054	25313431	c	(T)10gatagataagatacaactaaaggccggtcgagatgacccaccccataagagcagg(A)13	78	-	AACTAAAGGCCGGTCGAGAT	TGGTCCGATGGGATATCATT
chr1	25324770	25325265	c	(A)12gaagtataacatcaagctattatcatcaaatccaacattaaaaaacggatcaaagcacaaacaaccataaggcctacaaaaaatgga(T)14aagtgtttaaaacgtaaaaaacgtgtttaaaacataaaagttgtgcttaaaacattaaaaaaaaagtg(T)15	196	-	CGGATCAAAGCACAAACAAC	TCTCTTTTGAATCGCGTTTTG
chr1	25333494	25333899	c	(A)10gtaaaagagaaataaaaggtggtacttagagcaatggtgcatatccatatatttaacaaatactattaaacaaattagcttttc(T)12	106	-	TCGTCTATTTGCTTCATTGCC	CCCTCCATGAACTTGAAACC
chr1	25344054	25344431	c	(TA)9(AT)30	78	-	TGTGTGTGGGCATTTTTGAT	ATAAGTCTTTTGGCCCTCCC
chr1	25380575	25380925	c	(A)10tccaattgatcactttttgtttcttgaa(T)13	51	-	ATCTGATCCTCTTGACCGGG	GGCATTTGCTTATTTGGGAA
chr1	25389153	25389572	c	(T)11aaatttataaattcagaaaaataatttttatatattataaatccagaaaaacgactgtccaaaactgtcattttttcggacagtccagtactatcgtg(T)11	120	-	TGGGTGATGTTAGATGCCAA	TGGACAGTCGTTTTTCTGGA
chr1	25390498	25390883	c	(AT)9tgaacgcaaggttttatttatttattaattttgattttgatacaaatgaagatgaggg(T)10	86	-	TGGAATAAGCTGATTTTTGGTG	ATGTTCAGCACCCAACCATT
chr1	25414402	25414805	c	(AT)16tttttgaacacaaggttttatttatttattaattttaattttgatacaaatgaagatgagga(T)10	104	-	GAAGTTTTGGAATGGGCTGA	ATGTTCAGCACCCAACCATT
chr1	25433495	25433916	c	(AG)20aaggaaatcgcagatcagagggagattctcacaaacgggtgagattctcacgaaccagacaa(AG)10	122	-	CGCAGATCAGAGGGAGATTC	GGCGCACGAAATTTAGAGAA
chr1	25437379	25437796	c	(A)16cctatttatgttcttgagatttgaaagttggccaagaggttgataagtagaaaaaaaaatgttaccacattcagggattaattttccttaa(T)11	118	-	GTTGACTGGGACACTCGGTT	GAGGGCAGAGACAAGTTTCG
chr1	25438566	25439064	c	(T)11aaaataatttaaaaa(AT)46aagtggttcggatttcggattggttcggttctgttatatcctaatccgaaaccgaaccaaatcaatcgga(T)11	199	-	CTAATCCGAAACCGAACCAA	ATGGTGATAGGGGTGCACAT
chr1	25458098	25458451	p2	(TA)27	54	-	GAGCTGTTGAACCGTCTCCT	AGTTGAAAAATCGTGGACCG
chr1	25458780	25459137	p2	(TA)29	58	-	GAAGTTTTGGAATGGGCTGA	CAGCAACAAACATTTTGGCA
chr1	25464112	25464483	c	(A)15tgcactgtaaagttacactttaaatatttaatttctttattga(T)14	72	-	CCTTGCCTTAGATTTTCGCA	TGTACACGTGTCAGGTGGGT
chr1	25467795	25468166	p2	(TA)36	72	SSR-6	TGATTCCCTCAAGACCGAAG	TTGACGACACTAATCAACCAGG
chr1	25508881	25509262	c	(A)10taaaaaaataaaaagtaacatccctaccctcttgtgatcatggtttagatctgatttaaa(AT)6	82	-	CAGGTCAGAATGAGTTGAGGC	TCACCCTTGAAAAATTGGGA
chr1	25509421	25509925	c	(CT)11ccgatctgattcgaaccagtcataattttttaagaggaaatcgagggtttcgagtttcgacggtgcgaactccgacacatcttcgggtca(TC)12g(TC)24gtag(CT)8	205	-	ATTCGGAACGATGAATTTCG	GGTTCGAATCAGATCGGAGA
chr1	25546030	25546401	c	(AT)8aatatatatataatatatataaatatat(TA)14	72	-	TCAATTTGACTCCCGACTCC	TTCAGCCAAAGTCCATTTGTT
chr1	25551150	25551616	c	(A)12tttcaattgagggttgaggaggaagtggag(GAA)7gagagagggttttaacggcggtgaccgccaacaatggtggtagtgacggcatcaattgtagatggccacaacgacagtgatggtggtag(GAA)5	167	-	TGTTTGATTGCATTTGGGAA	TCACCCTCACTTTTCAACCC
chr1	25553941	25554370	c*	(A)10(AATT)5*ttaaccgttaaattttagtttcatatgtatgaaatccgaagtcatctattttcaacaccaactatcaagctcaaaaagtcg(T)21	130	-	TGTTTGGTTAAGTGCCTGTTTG	TGAGCTTGATAGTTGGTGTTGAA
chr1	25581768	25582117	c	(TC)8ta(AC)16	50	-	GAAAATGTGGAGCAGCGTTT	TCGTTGTCTGCATGTTTGTG
chr1	25618010	25618371	c	(AC)14(CA)8(TA)9	62	-	CACACCACACACACACACACA	GCGTGGGACATAAAAAGGAA
chr1	25649836	25650218	c	(A)17gttgcttacctgtgtgagttgcagagatgaattcctgattgttaaatc(AG)9	83	-	TGTTCACTCTGTTTTTGCGG	AAACTGCCGACTCTTTCGTT
chr1	25650301	25650674	c	(T)10caaatctaatccaaagcataagttcaagagatatgaactgttaattaagtctag(A)10	74	-	GGAGGTTTAGTGACCGTCCA	AACTAAAAGTTGGGGGTGCC
chr1	25664665	25665062	c	(T)10ctaaatgattcccagacctccacaacatttatcatgattgaatgctttaaccattcgaactcatcattttcat(A)15	98	-	TTTCCTTAGAGGACCCTCGC	AAATGTTGTGGAGGTCTGGG
chr1	25691211	25691639	c	(TC)9ttccatttgtaatttactcaacaaaaccactctgttcttcttctttctctctttacagacgaggaatgcctgcacaccttctcatgcaacaagaaagaa(AG)6	129	-	TCCATTATCAAATCCCCCAA	ATTGCAGCGCTCTCTCTCTC
chr1	25692515	25692900	c	(A)19cgctgttttctcgattaaaaagtaagtgctttaggtttcagctattttctttcaaag(A)10	86	-	CGTTTTTGACATATTTTTGCG	TTCCTTTACCTTCTTTTTCGG
chr1	25694883	25695270	c	(T)14ctataagaattcatattttgcattagttgaaaacaatattttgatt(TA)14	88	-	GACCGAACCTGGTCTGGATA	GGTTGATTATGATTTGATGTCTCC
chr1	25734918	25735281	c	(ATT)5ttgtgtgtgtgcgtgtgtgtgaacacgaggt(G)18	64	-	ATTTGTGGCTTTGCGGATAC	AAAAATCATGCGAGGACCAG
chr1	25762850	25763199	p2	(TA)25	50	-	GGTGTGTCGCAATGTGAGTC	TCTCTCTCTCGCTCGCTCTC
chr1	25784108	25784553	c	(T)16ca(T)12cttatatcctgattgtgatagttgttcagttgttgttggggatgtttaaatgtcatcaataaatgttcatggatctacctatactaatt(G)12aatca(T)10	146	-	AAAATCCCGGAGAAAGTGCT	TCCCCAACAACAACTGAACA
chr1	25792253	25792666	c	(A)11ttgatgtcccgttgtttttgctaaaatgaattatcacattagtaatccaacaccacaaccctctaaatttcataaaaaactcaaatt(A)16	114	-	GTGCCTTTGCACATGTCATC	AGCAAAAACAACGGGACATC
chr1	25792488	25792855	c	(T)14caaaatgcacagaatttcatcatctacaactttgaagctagatc(T)10	68	-	GACGCTCTGCTATGCTCTCA	CACACAATCTCATCGTAGAATCG
chr1	25793928	25794311	c	(T)20cgattctagggtttttattcttttggtgcaaggttgtcaaagacttcaaaaggg(T)10	84	-	TTTGGTGCAAGGTTGTCAAA	GAACAAAACGGGAAGGTCAA
chr1	25797047	25797406	c	(T)14cttttctctattaatgcaatctttacaattat(A)14	60	-	TTTGGATGTCTCCTTCCAGG	GCTGAGATAGCCCCCATACA
chr1	25824026	25824414	c	(CA)6tacacacagactctctcacacgtaaccctttttaccttctacagtttcttgggagaaagaatagt(AG)6	89	-	TTTGAAGTTTGAACAGGGGG	CTTCATCTCTCTCGCTCGCT
chr1	25828980	25829333	c	(A)11taataataaataaatcacaaacttctttcca(TC)6	54	-	TGCAATTTTGTAATGGAAGCA	TTAGGAGGCGTGTGTCAGAG
chr1	25829591	25830017	c	(A)12gataacttgaaaaaaagataatttttctttgttgaatttgaaattggggattcagagctcggtagctgtctattttcaaagccttgtatcaaatccaac(T)16	127	-	TGAAATTGGGGATTCAGAGC	TTTGTCCTCTCACCCTTTCAA
chr1	25840661	25841051	c	(T)17ctttagaggaaattattaaaataggtatgtattttatcaaaatcattcataaaacctgtt(TA)7	91	-	CGAAAAAGAAGGAATAGGAGCA	ACCCTTGAACCTGACCCATA
chr1	25849082	25849444	c	(A)10taaaaataaaaacaactaatcatctttaatcttttgggtgca(T)11	63	-	TCATGACATGCCCATTTGAC	ATTTTCCCCAAACCAAATGC
chr1	25851526	25851919	c	(A)13cgatt(A)14ggtcattgaatagccgtttttttttctcctctttctatcttttgattattt(A)11	94	-	TGTCATTGAATAGCCGGTCA	GTCATTGAATGGCCGATTTT
chr1	25851904	25852265	c	(T)18aattcgattttttttaaataatca(AG)10	62	-	AGAGAAAATCGGCCATTCAA	AGGCCGGTTGTTTTCTCTCT
chr1	25862409	25862796	c	(T)10ccaagaaacctatataatctgctctttttcttttttcttttttcttttttctg(T)25	88	-	ACAGCTTGACCGCTTCTTGT	TTCAGAGGGAAACCTGGATG
chr1	25882620	25883127	c	(TC)9tgcaaaagagaaacaacacaactatcactctacacgcaacagaagcaacgacgagttc(TG)8tttgtttgcgagtttcctgcaatgccaccacagaagcgattgtctgagaatctggacgaggattctcagcaacgccatcaccatcaacatcaacc(ACA)7	208	-	TGTGTGTGTGTTTGTTTGCG	CCTTCTTCGTCCTCGTGTTC
chr1	25882934	25883355	c	(TC)17gttgtcatcttcatcttctttgtttctcagattcggatggaagcctttcttcgagtgatggagaggaagacgagtacg(T)10	122	-	AACACGAGGACGAAGAAGGA	AAAGGCTTCCATCCGAATCT
chr1	25896611	25897026	c	(A)25ttaa(AG)14cgcttctatttg(C)19aacttttcctcc(T)16	116	-	CCCCAACTTTTCCTCCTTTT	ATAGGCCCAAAAGCGAAACT
chr1	25910283	25910653	c	(TA)20gagagatagat(AG)10	71	-	TGAAGCTGTTTCTCCACCCT	TTCTTTAACATGCCAAGGGC
chr1	25933669	25934023	c	(AT)12agggtcccgttcggcaccc(AT)6	55	-	TGGTAAAACTTAGGGTGCCG	TGGTAAAACTTAGGGTGCCG
chr1	25938034	25938424	c	(A)10ccatacacatgaggatgagcgtcgtggtttgcatctgagttactcttacatgcacatcgttactcgt(GA)7	91	-	GAGAGAGATGGGGATGCAAG	GCGCCTCTCTGGTTTAAATG
chr1	25948282	25948641	c	(TA)11(GA)19	60	-	TCATCATTTCGAAAACACCAA	CATGCTCAGTTCTGCTTTGC
chr1	25966644	25967042	c	(TA)7aaaaaaggcttatttaaaatgcatttcatatctctaatgattataaaaaatataaaataaaaacttgactt(A)14	99	-	TTTTTCTTTCCATGAGATGGG	CCTTTACAAACTTATCAAAAGTGTTCC
chr1	25986402	25986807	c	(A)15cacttgtttttgtgtgtctgtgctctctctcatcctctctctacttaatcttcaccctaccataaaatccttttctctat(A)11	106	-	AAAGTTTGCATGAGGATCGG	TTGTTTGTGGCATTTTGCAT
chr1	25989342	25989700	c	(AT)17a(AT)12	59	-	TGGATGATCTTCCCATCATAGA	TCAAGGGCCATCTGAGAAAC
chr1	26020672	26021112	c	(GA)8aagagaa(AG)6ggtgtaagttttagtgttaagtccccaacaagaaaaaagaaatccatgatgcccttcctcctccttagatctga(TG)8(AG)8	141	-	ATGCCCTTCCTCCTCCTTAG	TAGGATTTGGATCAACCCCA
chr1	26057325	26057720	c	(TC)6tttctcgactctctctgtctctctctctttcactcactggtttttcttcgatcaaa(TC)14	96	-	ACTCGACTCGACTCAGGCAT	GATCGAAGAAAAACCGGTGA
chr1	26108074	26108439	p2	(AT)33	66	-	GGTTCGGTTCGGGATAAGTT	TGCATAGGATGCAGTTTTCG
chr1	26121213	26121628	c	(T)11catttttcatacttaaagtttagattattttactaatttatttttatttaacttaagactttttttaaattataattgaatttataacttt(TA)7	116	-	ATCAAGCAAATCACGAACCC	GTTGGGTAAATGGTTGGGTG
chr1	26134512	26134880	c	(CT)9c(CT)8(AT)17	69	-	TCTCATATGGCCCTTGAACC	TCAGCCCATTCCAAAACTTC
chr1	26136589	26136980	c	(TC)7gtcttattgtggaggaatggccctctcctcaaatttcattcttcctcatattcccagccaaagctc(CT)6	92	-	AAATTGTTTGGGCTTTGCAC	TGGCTGGGAATATGAGGAAG
chr1	26139941	26140543	c	(A)19gaggaaggaaaaggaaagggatgag(GA)11aattttaggtcgttacatacaatcttcgggcgaa(T)20gtagctttccaatcaaacccaaagagtgtcaattgaggtaattaattcaatataaattttgaatttaattg(T)11catagatctaattgatttaggatttaatttattttcaaatgtaagattgtatttcttggtgaatcttgaagttattttcaaatttgag(T)13	303	-	GGAAAAGGAAAGGGATGAGG	TTTGGGTTTGATTGGAAAGC
chr1	26144427	26144794	c	(T)14aagaatgtcaaattcaagattgataaaagaaaaggga(T)17	68	-	ATGCCCCGCTCTATTGTTTT	TTATGGGAATGCAGCTTTGA
chr1	26154187	26154592	c	(A)11gaaggattagaattagttgtttttttaataagtaattagaattagttatgtatatacatcaaaatttgatga(T)23	106	-	TGAATTAGAATTAGTTGGTCATCAAAA	TTTTGCTTATGTGAATGTACGC
chr1	26204844	26205233	c	(A)12ccaactctagtggtacttcacaatattaggatccacttagtatatgatacaagatgtcttactt(A)14	90	-	AAAAATGCTTAATGGAAAAACTTGA	GCATGCCTAGATGTCCCAAT
chr1	26210002	26210405	c	(T)15ccatcatataatgcaataaaaaaaataactttaaacgataaatactgcaaaatttcccactctaaaaacagctgct(A)13	104	-	GCCCAAATTCGAAGAACTCA	CTTCGTCCTCCTCGATTACG
chr1	26257926	26258278	c	(TA)6t(TA)20	53	-	TTCGTGTCTGTGCCAATACC	AAGATTGTCAGCCGAACACC
chr1	26258320	26258715	c	(A)10ttcagtgttttgtcatcctatgattgtcagttgaactctctcctctctctttctcc(AT)15	96	-	CGATCCAAAACTTTTAAGCCA	TGTCTCATGAACCACCTCCA
chr1	26262534	26262929	c	(TG)6gataaacctaacatcaaactatcgttttgtcggaccgactttatttactttactcttcactcttaatattacta(T)10	96	-	CCACTTTTGTGTGTGTGTGGA	GGTGGGAGGATTAAATGGGT
chr1	26292109	26292491	c	(A)12caataattttaacaccatcactgacctagaattcaatatgactaatatttgcataatccat(A)10	83	-	TGTCTCTCTATTGAGCATTTCCA	TGGAAATTTTCTTTTCTTGTTGG
chr1	26297168	26297544	c	(T)11caaactaagcaagcaaggattttataaataataagaagcaagatcaaactcctact(A)10	77	-	ACCAACTTTCATGGGCAGAG	AAAGGCGTTTGATTTTGTGC
chr1	26301380	26301770	c	(AT)12tttttgaacttgacctaggccatgaatcatagaaggtaaggtgttgtttg(T)17	91	-	TGGCCATGTCAAAACAAAAT	AAACAAATGGAGCATCCAGG
chr1	26343197	26343624	c	(AG)9attacactgaaatgttttaatggtttatggttaggcaagcagccaaatttccataccctaatagagagggcatctcttattcagtgattagaacc(A)15	128	-	TTATGGTTAGGCAAGCAGCC	TAACCTGATTGGGATGGAGC
chr1	26363959	26364351	c	(AT)26tatat(TA)18	93	-	TGGCTCCACGTATACCACAA	AAAAAGTTGGCCATTGAACG
chr1	26364819	26365204	c	(AT)11gggaaatgttcagcaccctaagttttaccacacactttaacaaacgtttt(TA)7	86	-	TCAGCCCATTCCAAAACTTC	TAGGGTGCTGAACATTTCCC
chr1	26374174	26374619	c	(T)29gtggggacagctaaaagt(A)21ttgtggagggcaaagagtg(A)10ttgtgagagtgataatggcagatttgttttgaatgag(T)12	146	-	ATTGTGGAGGGCAAAGAGTG	TATCTGCCATCCAACACGAC
chr1	26392321	26392689	c	(T)12aaatactagatttctactttttgagtttaaggtgtcgataacaattc(T)10	69	-	ACAAATTGGGGTGCCAATAA	AGACCTAGATGGCCTGCTCA
chr1	26397525	26397918	c	(A)10taattataggggcaaagagtgaaaaaaataaaattgtgagactgataatggcagattttttttgaatgag(T)14	94	-	TTGGTGAGGTTTCTTGGGAC	TATCTGCCATCCAACACCAC
chr1	26424551	26424959	c	(T)14gtttgataagtttatataaatctattaaaaacagaaaaatggtgaggagatggcctctttaaagtacaagaggaaagctgg(A)14	109	-	ATAATGGAATTTGTGGGGCA	AAAGAGGCCATCTCCTCACC
chr1	26442647	26443049	c	(A)10gcttgtttctatgtctctgtctttcttctcatctctcatccctcatccaaaagaagaacaaagttggagctaggtactctc(CT)6	103	-	CATCTCTCATCCCTCATCCAA	TTGGGAAGAAAAATCCAAGC
chr1	26477023	26477397	c	(AGA)5aatgtgtttggtaagctattgagcgggtgtaatgagaattagac(A)16	75	-	CGACTCAATTGGAGGTGTCA	CCCGCTCAATAGCTTACCAA
chr1	26498979	26499344	c	(TC)18gcgtgcgcat(AC)10	66	-	TGTGGCACCTGACATGTTTT	TACCCCCTTTAACCCCAAAG
chr1	26499833	26500192	c	(TC)15gcgtgcgcat(AC)10	60	-	TGTGGCACCTGACATGTTTT	TACCCCCTTTAACCCCAAAG
chr1	26500680	26501041	c	(TC)16gcgtgcgcat(AC)10	62	-	TGTGGCACCTGACATGTTTT	TACCCCCTTTAACCCCAAAG
chr1	26502869	26503282	c	(CT)10cctagaaaacgagatgagagggaaaaaaaatggagtggcaggcatttataaacttcctttgggtgagagaatcac(A)19	114	-	AATGGAGTGGCAGGCATTTA	CGGGACAACAACAACTAGGG
chr1	26511176	26511567	c	(A)10ttattttaaataaatgttttaactttataatatgtatcaattaatgcaatacaaaagcattgttgtaattc(A)11	92	-	CTTGGCAAACTTTAGGGCTG	CCGAACACTCGAATTGTTGA
chr1	26522024	26522381	p2	(AT)29	58	-	TATTCCACAATCCCTTCCCA	ACGAAAGCTTAATCCCCGTT
chr1	26533064	26533487	c	(AT)11aatttgttttgaattaaatccaaggttttgaaagtggacgactgccaaacttccttataactcccaaacttaaaaatgaaatttaatggcaa(T)10	124	-	TTCTAGCTCGAGGTCGCTTC	GTTTGGCAGTCGTCCACTTT
chr1	26533838	26534198	c	(CA)8(TA)9t(TA)13	61	-	TACATATGGCCCTTGAACCG	GAAGTTTTGGAATGGGCTGA
chr1	26552123	26552527	c	(T)17atactaaaaacacttttgatatcccccttcacaacaatctttatcactttgggaaaatcaattaggggaaaactttaa(T)10	105	-	TCCCCCTTCACAACAATCTT	GAAGCTTGACCCATCGAAAG
chr1	26559810	26560159	c	(AT)13(TA)12	50	-	TTGGGAGGATGTTCTCAAGG	TCAGCCCATTCCAAAACTTC
chr1	26585145	26585543	c	(T)15acaaatttgggggaaatgacagaaaatgttgttaaacccatttcttccagagattatggaataaatcc(A)16	99	-	TTTTTATCGGAACGACGAGG	TTTCTGTCATTTCCCCCAAA
chr1	26585476	26585850	c	(A)16cgaaactacaaccaaataaaaaatatcaacaaaccccaacaaaac(A)14	75	-	TCCAGAAATCAGGAAATCCG	GGACTTGTACGACACGTGGA
chr1	26588542	26588921	c	(TA)7ttatatata(AT)18gttgagg(GA)7	80	-	AAACTGTTGGCCACGGATAG	GCTCAACCCCCTCTCTCTCT
chr1	26590687	26591047	c	(A)10tagataagaataaatgaacatttatgtcatctcttaatcaa(T)10	61	-	CATGCTAACCGCATCATCAC	GGGCAAAAACGAGAGAAAAG
chr1	26591916	26592282	c	(A)15caaattttttttaaaaaaaatttctctctttacttaaaa(T)13	67	-	TTCATTTCTCTCTCTTTTCTCTCTCC	CTCACCCCTTCCTCTCTCCT
chr1	26594317	26594706	c	(A)12tatattaaaataataaagtttaaataaaaaaagaatgggcttttcttttgtttctcttttcaaattc(T)11	90	-	CATCCCACGTCAAACTTGTG	ACAATCCCGTGAATGTGGTT
chr1	26598114	26598504	c	(AT)11a(AT)34	91	-	GGATGATCCCCTCACCATAG	GCGTTATTACGACCCCCTTT
chr1	26612356	26612705	c	(T)31(G)19	50	-	GAAACTGCCTAATCCCTCCC	GATTCGAAACAGGCCTACCA
chr1	26650175	26650529	c	(A)11tcctcctttttggttcgccaccaagtgtttgtg(T)11	55	-	ATTCAAACGAGCAGCTTTGG	CCTTACACGTCGCCCACTAT
chr1	26650438	26650789	p2	(CT)26	52	-	GGCTCTCTTGGGACTGCTTA	ACAAACACCAGCTCTCCCAC
chr1	26656031	26656418	c	(T)12aaaaaaaaacttcattttcctctcaaaacggacctcttgggtaaatatactataataataagaaat(A)10	88	-	CCCCTTTGACCTTTTTGACA	CCAAGAGGTCCGTTTTGAGA
chr1	26659485	26659931	c	(ACC)6attacactaacctcgccgtcgtcgtcattaccatcgccgtcgctgttggctccgtcttcgaccacct(TC)6ttcttctcattcttctccatccctcacctcttccg(CCA)5	147	-	TTTTCCACCCCATTCAAAAA	GTAAGTGAGGCAGATGGGGA
chr1	26664618	26665101	c	(T)14caaatttcttcttgtttatacaagttctttgatttggatttctactctaacaag(A)13tttctaaaacatattgattataagagtgagagaatgataaagaaagatagtgacatttagctataattggattcacgggagcaatggctcta(T)11	184	-	CCCAAAAATTGGGCTTACCT	ATGTTGCCACACCAACACTT
chr1	26667476	26667851	c	(G)11agagtagaggtgggactgag(GGA)5gaagagaaagaagaag(GA)7	76	-	GGGGAGAGTAGAGGTGGGAC	AACCACCACCACTGTCATCA
chr1	26673044	26673413	c	(T)10gtttattgttgaacctgcaaaacgcattttaaaccagactttaaaaatt(A)11	70	-	TGTTTAAAACGGAAAAATGCG	TGCAATTGAAATCAATCATGG
chr1	26674466	26674848	c	(A)11gtcattttcaagagatttttcaaacattttaaagatctacgtaaaaaattagtattttttca(T)10	83	-	CTGGACCTCAACTCCCACAT	AGCCTCCGAAACTTGATTGA
chr1	26700952	26701338	c	(C)11tctcaaaaaaa(AT)6ttttacactcttagtttcattcttaattagttgtccc(A)16	87	-	CGACAGCACTAGTCCCAACA	AGAGCTAGGGTTTTGCCCAT
chr1	26713501	26713914	c	(TC)7ttttgcaactgcgagcgtgcggctagttgctgcaggttgcctctcagctccgacaatcgacggatcgtctctttct(CA)12	114	-	CGACGGATCGTCTCTTTCTC	CTCCGACCGATTGTTCAGTT
chr1	26741559	26741915	c	(C)15tcaccacacac(A)10gaga(G)17	57	-	ATTGGTTTTGGATTTGCCAC	CCACAACAAATCCGTCTCCT
chr1	26744533	26744949	c	(T)13aaattcaaattttagacgttatcacttactttctcgatcgaaatttccatctcatgaggattttccagggagggaaaatattttccgatgta(T)12	117	-	TTCAAAAAGGTATGGGAGCG	GACATCTTCCCTGGCGATTA
chr1	26758151	26758549	c	(CT)24(AT)10tgttgctgaacattccc(AT)7	99	-	CCCACACTCCTCACACACAC	TCAGCCCATTCCAAAATCTC
chr1	26758769	26759184	c	(TA)7ttcaactttaggttttggtatgggattgttaactgctttcgacatgatttgatattaattactcaaattttctactatct(TA)11	116	-	TATATATGGGGGCGGTTCAA	AGTGACCTTCCTCGCAAAAA
chr1	26759298	26759987	c	(AT)7taatatcaaatcatgtcgaaagcagttaacaaccccatatcaaaacctaaagttga(AT)7tttctcatatgtctcttgaacttgaccctg(TA)6ttaatatcaaatcatgttgaaagcatttaacaaccccatatcaaaacctaaagttga(AT)6tttctcatatgtcccttgaacttgaccatatatatataaatatcaaatcatgtcgaaagcagttaacaaccccatatcaaaacctaaagttga(AT)7tcaattatatc(TA)15ttatatatatatc(TA)17	390	-	CGAAAGCAGTTAACAACCCC	CGAAAGCAGTTAAGAACCCC
chr1	26778581	26778953	c	(A)11ccaatttaataattatttatcagaaaaatatcattttttgtgaatttac(A)13	73	-	AAAAACTGAAATCGGCACTTT	CCGGCACTTTAATTGTCGTT
chr1	26783509	26783916	c	(TAATA)5aatattaatataatataatattttaaatattaatattaatataatgtgtttaaatccattatactcaaaatt(A)11	108	-	AAAAATTGACAGACTGTTTGACATAA	TGTCAAAAACAATATAATTTAAAGGCA
chr1	26802416	26802804	c	(TA)24g(AT)11ag(AT)8	89	-	AAGGGCACAGAACCATCATT	CACAACTTCCCAAGCAAGTG
chr1	26802651	26803058	c	(CA)11cttggttttggatcaagaccctactttgaacctacc(CA)25	108	-	CCACTTGCTTGGGAAGTTGT	GCGTGTGTGTGTGTGTGTGT
chr1	26806165	26806575	c	(T)10cttaccaacttgaggcttttctccatccaaataaaatatcaaacatgttcttctatctcaatctaaatgcttgaatt(GAA)8	111	-	TTGAGGCTTTTCTCCATCCA	TCAGCTTTCTTCCTCCTTGG
chr1	26813210	26813589	c	(A)13ttctgaaaaaagaacaaataatattttttttaagattaaaaacccc(A)21	80	-	GAAAATCTTAAACAACGTCGAAA	TGTTTCTTTAAATTTCTTGAATGTTTG
chr1	26818090	26818564	c	(A)14ttagcaaacattcaagaaattttaagaaacaaataaataattgactttaattataaaatcttgattaattaaagggggaattat(A)11ccaaaattaataattatttatgagaaaattatcattttttgtgaatttac(A)16	175	-	AAAATCTTGATTAATTAAAGGGGGA	TGCCGGCACTTTAACTATCG
chr1	26820196	26820610	c	(A)11caaagttttttgagtttgatccaaggtgttgaaaatggatgaccactgaacacccatatttaaaattaaaatttaataactaaaactaa(T)15	115	-	CCTACACATCCTCTGCCCAC	AAGGTTGTGGCTTTCGATTG
chr1	26873750	26874101	p2	(GA)26	52	-	GCCAATTTGGTGATCCATTT	TGTGGCTTACGTGGGATGTA
chr1	26880915	26881309	c	(AT)13c(TA)6t(TA)15atatatatata(AT)7	95	-	ATGGGCTGATTTTTGGTGAG	TTCAACGCCCTACGCTTTAC
chr1	26917335	26917701	c	(T)12gacggccctggactatcaaattattggagaatggattt(A)17	67	-	GACGGTCTTAGCCCATCAAA	GGTGAATTAGAGGACCGTGC
chr1	26926887	26927310	c	(T)10caaagttcgtagaatattcttgtttacaattatgtgacatcaaataatgtttttggatgccataaggtggtcagaaaacgtaaggaaagtgtttttcaa(TAT)5	124	-	CCGTAAATAAAATTCAATGGTGA	CTGACCACCTTATGGCATCC
chr1	26946119	26946491	c	(T)10aaaaaaaaagcgtatagcagcggattttaatatccgccgctatatgtgttata(T)10	73	-	CTAGACTTGGCCTCATGCGT	TCCGCTGCTATACGCTTTTT
chr1	26964850	26965267	c	(T)13ataattgtttatgagatagagttatttctttatgagatgaagtcattttccattgaaaaagtcgattctttcacactttaggttgatttatatat(A)10	118	-	CCAAGGATGCAATGATTTGA	AGTTTTTGACGGTATGTGGG
chr1	26978381	26978771	c	(A)10ttatttatattttactttgatttcatggaggttgttcatcaatgtttgtttgcaaaatacttatcc(A)15	91	-	TTTCATGGAGGTTGTTCATCA	CGGTCGAACCAATTTTGTTAT
chr1	26979642	26979991	c	(A)13ttgagtaagtatttcttttcc(T)16	50	-	TCGGAGTTGTTTCGTTGTGA	AAAACATTACGGCTATGGCG
chr1	26983205	26983554	c	(TA)13(T)24	50	-	TGTTAAGGCTTTGGGTAAGGG	GGCAATTGTCTAAGGTCCCA
chr1	26986183	26986570	c	(TA)10(TG)7tatatatattgtttcttcaaattgaataaacataagttgtta(T)12	88	-	TACGTACAGCCCTTGAACCG	ACGGATGTGACGATGTGAAC
chr1	26989512	26989885	c	(T)12cgtgaagataattcaacccaccaatgagcctattcaagaaatagatgaag(A)12	74	-	CAACCCACCAATGAGCCTAT	CACGTTATTTCAGGCCCACT
chr1	27005972	27006337	c	(AT)16(AG)17	66	-	CCATAGAGATCATCCTCGCAA	GAACTGGCACTTAAGGTGGG
chr1	27042416	27042847	c	(G)22agcaaggattacttaaaagaccctgatgaaaagatttctttctaaatagtccctaaggtttgggcggtagcttaatagtccatcgggggac(G)19	132	-	ACCCCCTCTCGAATCATTTT	ATTAAGCTACCGCCCAAACC
chr1	27047126	27047497	c	(C)14tatgcctaggcgggggaattttaatcagagtcgtgataatatgacg(C)12	72	-	TAGGCGGGGGAATTTTAATC	CCAAGCCAACGTGGTATCTT
chr1	27050279	27050651	c	(CT)6ttattttttattttttcatcctctccaccgtagatctcatctttacg(A)14	73	-	TTTTTCATCCTCTCCACCGT	GGCACACTCTTCAAAGCACA
chr1	27056963	27057332	c	(A)11tcaaatggttaatctattgatattttattttcagttaattttgcataaa(T)10	70	-	CTTGCTTTGGAAGGAGATGG	TCCAACGAAACAAATCCACA
chr1	27059010	27059436	c	(A)11gagttttaagacagcattttagcattctcctgccctcataatcagttctttgagtttgaagagcttgtaaagaaatgatggcaagaaataacaatata(AAT)6	127	-	GATCAATTCGAACCGAGGAA	TATCGCTCTATGGTGGGGTC
chr1	27074345	27074753	c	(GA)7aatgaagaggcgacctgttggccatcggagttgagagagttcacagccgctagccctagccacacgcccacagttgc(GA)9	109	-	GAGATCTGGCTCGAAGGTTG	AAGCTGCCTTTTGCTAGCTG
chr1	27075630	27076035	c	(AG)8aatattataatagaataggattcacgtttattaaccccagcaattgagataaggtgtagatgaggattctac(A)18	106	-	CCCCAGCAATTGAGATAAGG	AGAGGCAAAGACCACTAGATCA
chr1	27079945	27080299	c	(TAT)7c(ATT)11	55	-	CCTTGAGAACAAGCCATTCC	CTTGATGCGTGTGATGTGTG
chr1	27093939	27094325	c	(AAAT)5cgagcagacggctaatttattgtttctttttattttatggcagagagcatgagtc(CT)6	87	-	GTTCACTCAGGTCCGGGTTA	GAGGACTCATGCTCTCTGCC
chr1	27139167	27139540	c	(TA)11(AT)26	74	-	GGGTGATCATTCACACCCTT	TGAGTCAGTGAAGTCGCATTG
chr1	27156704	27157117	c	(A)10tgttaaggagctaaatgagaataaaatatttgattaggttacaaatatggagaaaaaaatttgatgttaaaagca(T)10cttcttatt(G)10	114	-	GGGGGATGATAGGGATTTTC	GCCCAAGGTTGCTTTCTAGG
chr1	27184365	27184794	c	(T)22aattttttaagattttctgccaattaaagtgtcgtaactaaattttttatattttttttcctccatttaaagcggcgcacaaaactttttctttatca(T)10	130	-	CAAGTGGCGCACTTTAGGTT	TTTTTGATGCCACAAGGTGA
chr1	27195473	27195831	c	(A)17cagaatttaacatttttaattaaagtaaaa(AT)6	59	-	TACCCCTCCAACGGAATGTA	TTGATCACTGGTTGTTCATTTG
chr1	27225013	27225427	c	(TTTTGT)6ttttatttttattttttttagaatttaatgataatgattgagtattttgtaaaaattactgaattaac(T)11	115	-	TCACCGTTTCTTAAACATGCC	TGCCCTTTGGTTAAGTGTAGG
chr1	27247117	27247540	c	(T)14ggcacttggaagcttcttgatttgacaaaatttctttaatttcaacattccttttgccttctatgaaaccattgtttttcatgaataataatcaccatta(T)10	124	-	TGGTGGTAACAATGGCAGAA	AGAAGCTTCCAAGTGCCAAA
chr1	27271990	27272367	c	(G)22ttcaattaatttatcatattaaacttagattttgaaaaaatcaaac(A)10	78	-	AGCCACCCAAATTTGAACAC	ACTTCATCGCAATCGACCTT
chr1	27314558	27314934	c	(AT)9(TA)11t(TA)7(AT)11	77	-	AGTTTCGAGGCCAGCAATAA	TGAACCTTCTTCAGCTGCCT
chr1	27321158	27321570	c	(T)10ctttctgtggacaacatcatcttcttatgtaattcaacaagtttaatgaatcagaattcaatgtatgaactgttaagttggtttag(T)17	113	-	AATTGCACTTTAACGTGTGCC	TTTACATGTCGGAGGGTTCC
chr1	27330541	27330955	c	(A)12cttgcacaaggtttgaagagatctgacttgcagagcaagagatccgaaacttattttaataaacatcctctaaaagttggtgtacaactttc(T)11	115	-	GCAGAGCAAGAGATCCGAAA	TCGGTGCTATTTTCCGGTTA
chr1	27333680	27334099	c	(A)12ttgagattgatcatatataatgaaaatgtattgccatcgaacttctaaatttaaagtaaaaattcaaaagtgaaaattaactctcttttttttgaaa(T)11	120	-	ATTGGGCCCACATTGATTAT	AAGTTCGATGGCAATACATTTTC
chr1	27339544	27339946	c	(T)12aatttattttagaattgtttttaatcgttttgcaaggaaaccatattaaaaatcaatattatcttaatcgtttgcac(A)14	103	-	TTTTGATTCATTTGTGGGGG	ATGGAATCCCATGTGGAAAA
chr1	27359460	27359870	c	(A)11ggtcattgaatgaccggttttatatttctctctcatctttttctctctacaccttctctctcttaattatttaaagaaaaaatcgaattt(A)10	111	-	CTCTCTTAAAATCTCGCCGC	GTGAAGAGAGAGAAGGCGGA
chr1	27365277	27365682	c	(AG)7aaagagagttacctctgtgttttccgacaaggtgaggtaagggagagagacgaccgagaacggcggcgaggtttta(AG)8	106	-	TCACACAGAAAATTCGAGCG	TCGGTCGTCTCTCTCCCTTA
chr1	27365603	27366000	c	(TA)9ttacggttcggatttcggattggttcggtttgttatattcttaatccggaaccgaatcgaaataaccgaa(T)10	98	-	ATTTCCCCCAAATTCGATTC	CGGATTAAATACACCCACGG
chr1	27366044	27366456	c	(T)12aaattgattttttaaataattaagaagagagagaaggaggagagagaaaaaataaccggtcatttaatgacctgtttttttaaaaaatcg(T)11	113	-	AGAGAGAAACAAAACCGGTCA	AAAAACCGGCCATTGATTG
chr1	27379175	27379563	c	(T)14gaaaagtataatatattgatcaaagaaagaaaacaagaaacaaagaggccgagagagcttc(A)14	89	-	CAAGAAACAAAGAGGCCGAG	GAATATAGAGTTCGCGGGGA
chr1	27386217	27386650	c	(TG)14(AG)10ttggatgccataggtcggagaagatggttgtagagctcgcacaataggaaaaaaatagggggtttaaattttac(AG)6	134	-	GCCATAGGTCGGAGAAGATG	ACTCTTCCCATAGCCACCCT
chr1	27398937	27399293	c	(T)12ccttcattgataaaattttacactaacc(A)17	57	-	TCTTCAGTCCTTGTTTGGGG	GAAAAGTGGGTGGTGGAGAA
chr1	27401966	27402362	c	(T)10gttttttgtttagaggctcccttgacctccttgtttcttgttttctttctttgattaatatattatacttttc(A)14	97	-	GTTCGCGGGAATTACATTTG	ACCGTGTATCCTGAGGCGTA
chr1	27407894	27408266	c	(AG)16(GA)13agga(G)11	73	-	TTCACAGGGTTCGTCCAAAT	ATTCTCTCACAAGGGGGCTC
chr1	27469331	27469742	c	(A)11gttatttttcaccgttgtatttcaattctatgtttaagagttatttgaaagtttagtaaccatcaattttcaaaaacttggatcaagcg(A)12	112	-	CAAAAACTTGGATCAAGCGA	GTCCAACACTACCACAGCCC
chr1	27487713	27488112	c	(T)18caattaatgttatggtatttgcacctcacttatatatagtttgaattgatttactcataactatttagatg(T)11	100	-	CTCTGTGTTTACGCTGCGAG	GGTGTCAAAAACCGGAAAAA
chr1	27519302	27519734	c	(AT)12gctgtcataaagagaatcaagataatttttggggggcactatttgcacacatcaaaatggccaattgcacccgcttaagttacttttgttataa(T)15	133	-	GCCTCCAAACACTTCCCATA	TTGCACACACCCTTTTGGTA
chr1	27523518	27523879	c	(AT)14(TA)17	62	-	TGGTAAAACTAAGGGTGGCG	AGGCTGATTTTTGGTGAGGA
chr1	27530258	27530634	c	(A)10tactgaaaaaaatatttttcatcaattttaattttaaagtagggttcgctaagaggt(A)10	77	-	GGCTCTTTTTGCTCACCTTG	TCATCTTTCCACATCTCCCC
chr1	27578281	27578733	c	(AG)21aatatatacctggatgctcgccggtcggagtagacatgtcggagttcgcatatttgaagtgaaacccatcacgccgattgattagatcg(GA)11	153	-	TTTCATCTGAAAACTCCGGC	CCCAAACAACAGAGGACGTT
chr1	27588805	27589195	c	(AT)7ttttacttcatattttaaagttcatataatttttatactctacaactccataatattggatcatg(T)12	91	-	CAACCAACAAGCACCCAAAT	CACAGTCGCTTCAGCATTTT
chr1	27590175	27590542	c	(T)10ctctattaagcttgaaatcctcaaaaaagcttcaaaccttaaca(C)14	68	-	ACCCACCCTTCTGAACCTCT	CTTGGCTCTAGGCCCTCTCT
chr1	27598467	27598923	c	(T)10caaattaaagagcattagacaaatgaattttc(A)16tttgagattgtgaagagtttagagttcttttcttgttggttgaggaacattctcaatttcaaatcaataagttgttacttgttcaagg(T)11	157	-	TGGCGAAAAGTCCTTGAGTT	TGTTCCTCAACCAACAAGAAAA
chr1	27610689	27611075	c	(T)10aataaggaagccctcatttggtcaaatataaattaaagtccctcacacttgagggcacaaaccgag(T)11	87	-	TATGAAAGTGGGCCCTTGAC	TTTGACCAAATGAGGGCTTC
chr1	27618501	27618853	c	(A)11tcatgaactcaatagtacgagggaccattaag(A)10	53	-	AAAGCGGTGAACTCGACAAT	TGCGTGTTAACTCGACAGGA
chr1	27623537	27624042	c	(ACC)11attacactaacctcgccgtcgtcgtcattgccatcgccgtcaccgtcaccgtcgctgtcggctccggctccgtctccgaccacct(TC)10ttctttttcttcttctccatccctcacctcctctg(CCA)11	206	-	TTGATTGCACATGGAAATGG	GTGGTGGTGGTAGGGAAGAA
chr1	27635980	27636365	c	(AT)9a(AT)8(TA)6t(TA)19	86	-	ATTACGACCCCCTTTTGGAC	CAGGATGATTCCCTCACCAT
chr1	27646330	27646729	c	(A)11catagaatttacaactattatcgtcatcctcaatgaattttacaaaggttactagggaaagcaaaagacttc(A)17	100	-	GGGAAAGCAAAAGACTTCAAAA	AATTTGGAGAGCACAAGGGA
chr1	27647835	27648240	c	(A)12ctcaaattaatattcactgcatgacacctcatctcatggaaccctacaaacgaaacaatcaaccatttaaataac(A)19	106	-	CCTCAAAGTGGCCTTGGTAG	CTTTTCGGGTCGATGTTGAT
chr1	27649727	27650093	c	(T)10aaatacaaaaatacccttcttctaatacttacccatgtctctcac(CT)6	67	-	AGTTAAAAGGGCGGTTTGCT	CTTTGTCCCAAAGCGAAGAG
chr1	27678792	27679733	c	(T)10aaaaccggtctttcaaagaccggtttttctctctattcattcatttctctcactcttttctctctccttaaaaaaatgaa(T)12aaagtttttttctctcttcattcatttctctcactcttttctctcttcttaaaaaaaatgaa(T)10aaaatttttttctctctcttcattcatttctcttactcctttctctctcctattattt(A)11cgaatctattttaaaattttttatttttttaaataataggagaaagaaaggggtgagaaaatgaatgaagagagagaaaatttaaaaaaaaattag(T)11aaataataggagagagaaaggggtgagagaaatgaatga(AG)6aatttt(A)10ttcatttttttttaaagagagag…	642	-	GGAGAAAGAAAGGGGTGAGAA	GACCGGTTTTTCTCTCTCTTCA
chr1	27697370	27697729	c	(GT)7tgggga(G)40	60	-	AGCACCCTACCGTCTTCAAA	CAGCATTTCCCTGTTTTTCA
chr1	27700761	27701110	c	(A)10ttaatgtaccatttggttctcatatg(T)14	50	-	AATCCTTTGGATGCGTGCTA	TCTTGAGTTCGAATCACCCC
chr1	27709145	27709634	c	(T)10attttttattttttgaaatcttagaggttgaattcaaatgggttttggggataaatcaagg(T)10cttttcttttaaatttttttaaagatgagggtgcttgatcattctaaaagtctcttgcaaaactgaagtcaatggaaatgcaagaggtatctc(A)16	190	-	TGGGTTTTGGGGATAAATCA	CCCACCCATAGAACCATCTG
chr1	27714329	27714708	c	(A)12ggattgtgaggtagaaatcaatgagagagaaactttaaaacttggaaataatctca(T)12	80	-	CGTGCTATAGGATCAAGCCC	TGGGTCCTGTTTAGATTTGACT
chr1	27718741	27719170	c	(T)15cttcttttctttttaaattttttttaagatgagggtgcttgatcattctaaaagtctcttgcaaaactgaagtcaatggaaatgcaagaggtatctcc(A)17	130	-	TGTGCCTTTGTCAACCTCTG	GAATGATCAAGCACCCTCATC
chr1	27720934	27721318	c	(A)17gaggattgtgagatagatatcagtgataaagaaactttaaaacttggaaagaatctca(T)10	85	-	ACCTCAAACCGGCATTACAA	TGGGTCTTGCTTAAATTTGATT
chr1	27722423	27722816	c	(G)23attgcccccactcccactataaatccaccatgagcacttgattttaccacatgataaaag(A)11	94	-	TCCACCATGAGCACTTGATT	GGCCAAGTATCTAGTGTGCCA
chr1	27728504	27728928	c	(T)12cctgttatttttaaaaattttaagatgagggtgtttgatcattataaaagtctcttgcaaaactgaagtctagggaaatgcaagaggcatctcaac(A)17	125	-	TCCAATGGGTTTTGGGAATA	ACCCCTTCAGGAGGTCTGAT
chr1	27733507	27733923	c	(T)23ccttctatttccattcaaacattaggataaatcccacattaatccaacactttccttactaacttatgaagaaaagtg(T)16	117	-	TCCCACATTAATCCAACACTTTC	GCGTACAACCACATCAGTGC
chr1	27737597	27737983	c	(T)10aaataccggtcattgaaagaccgatttcttctctctcctctacatttaaaaaaaaaggaaaattatg(A)10	87	-	CCGGTCATTGAAAAACCGAT	CGTGAACATTAGGGGTGTCA
chr1	27738244	27738663	c	(T)10ataa(T)14gggggattttttcataattttcccttaattttcagatgcaagtgagtcaatggttggtaattagtagatgaga(G)19	120	-	GGGAGGGACTTTCGTTTCA	CCAACCATTGACTCACTTGC
chr1	27744909	27745305	c	(CA)21(TA)16t(TA)11	97	-	GACCCACACACACACACACA	TTAGGGCGTTGAACATTTCC
chr1	27760809	27761160	p2	(AT)26	52	-	TCAGCCAATTCCAAAACCTC	AGGACAAATGGGGCATGTAA
chr1	27762741	27763117	c	(A)11tatattacattccacttaattctctcatcatctcttttctactccttcaattacac(A)10	77	-	CCCCCAACTCTCACTACCAA	TTTGTTGCACCCATCTTGAA
chr1	27766088	27766482	c	(A)10ggcacaagcagacaaaccttcggacagcctttcccatcagatgaaccatttagcgactgtgccagtg(TC)9	95	-	GTCACGTGGATGATTTGCAC	GACACTGGCACAGTCGCTAA
chr1	27766799	27767226	c	(TTCT)5tcgttgatttctataaaagttgccccaagaagaactctctctctagtttctgaaaaaagcaaagaaatagtgcttgaatcagaaaaacagattc(CT)7	128	-	TGGGAAAGATTTCTGCCAAA	GTGAGAAAGACACTGGGGGA
chr1	27775299	27775744	c	(AC)7aagcgcacacacgcacgcacaaga(AC)15aagcacacacacgcacgcacaaga(AC)9aagcacacacacgcacgcacaaga(AC)6	146	-	ACACACACGCACACACAAGA	TATTTTGGATGGCAGAACCC
chr1	27777803	27778195	c	(AG)7aaggtggtcggagacggagccgacggcgacggcgatgacaatgacggcgaggttagtgtaa(TGG)6	93	-	GGAGGAGGTAAGGGATGGAG	TTTTCCACCCCATTCAAAAA
chr1	27779715	27780066	c	(A)16g(A)17gaac(A)14	52	-	CCCCTTTTAGAAGCACCACA	AGGCCCAGTCCAAATGTATG
chr1	27823611	27823994	c	(AT)9a(AT)22a(AT)10	84	-	CACTTATCCGGTTAGGACACG	TACATATGTCCCATGAGCCG
chr1	27833273	27833688	c	(T)15gggtgaaaaacccaattaaatttatccaaattctttgatacctaatcaaaatattagctttttctaacaacaaatagaatgtc(A)18	116	-	TGGGTGAAAAACCCAATTAAA	CCACCTGGGTGAGTGTTCTT
chr1	27838511	27838917	c	(T)16cttctttttaatagaaaaaatcactatcaacacttgcaaactatctttttagaagtaattactacaaataaaactatat(TA)6	107	-	AGACCACCCAATGGCATAGA	AATTTGGGCTCACATTCCAG
chr1	27873201	27873552	c	(A)11tttctcttttttaaagttgcacttgaa(AT)7	52	-	ATCTTGGTTTGGGTTTGCAG	CGTTTTGCACGTGACATCAT
chr1	27901088	27901453	p2	(TA)33	66	-	TCAAGGGTTTTGGTTGATTG	TTTGGGGTTTCAGATCTTGG
chr1	27916380	27916800	c	(AT)17gttttatttttttaaaataaaaaagcttgaattactcggaataattcaatagttcggagaataaaattttcatt(A)13	121	-	GGGTCATGATGCAAAGAGGT	GTGAGTCAAACTGGGCGGTA
chr1	27933914	27934290	c	(A)10ttttgatacaaaaaaacggttacctagtttatcaataataattccaatattcatcag(A)10	77	-	CTGGCCATACCCAGATCTTT	GACCCTTAGCTTGCTTGTCC
chr1	27954875	27955243	c	(AT)6a(AT)14(TA)7(AT)7	69	-	TCAGCCCATTCCAAAATCTC	TCAGCCCATTCCAAAATCTC
chr1	27961566	27961920	c	(A)11ttaaatacaaagacatgtcaaggagcaca(ATT)5	55	-	CTGGCAAAGCCTATGGATGT	GTTTGGGAATTCGTGGTTTC
chr1	27965317	27965695	c	(A)14tcttccacagatgttgatggaagatcttctgtgattcttaaattttttcca(TC)7	79	-	AAGTTTGGAACACATTGGGG	CAACAACTTCTTTGGTGATTGAG
chr1	27985816	27986193	c	(TC)15(CT)14(AT)10	78	-	TTCGATGGACGTGTTGAAAA	ATTGAAGTTGACGAGGGACG
chr1	28013467	28013897	c	(T)13ggttcccttggatgggaatcctctaagtaatagagatttttttaagatgtgaaatttgtagttaaaatatgattttcttcgaataaaacaaaattaag(GA)10	131	-	CCTGCCAAAAATGGGTAAGA	TGTTCTTGAGAGTTGGGGCT
chr1	28050062	28050467	c	(A)11gctgaaattatgagattgatgagttacttcaccatgtgtatggatcgtaactttaaaattaggataacgctgaagtaacatt(G)13	106	-	ACGCTGAAGTAACATTGGGG	GCTGGAGTAACCTTGTAGGGG
chr1	28058939	28059295	c	(TA)11catatatat(AG)13	57	-	TCATCTGCCATCTCTCTTCTTC	CGAAATGTCAACCGGACTCT
chr1	28091607	28091958	c	(CT)15(AT)11	52	-	TCAGCCCATTCCAAAACTTC	GAGAGTCTCATTCGCCAACC
chr1	28099837	28100259	c	(T)11gggag(A)10tcaactagaggttgaagatgagagcatttaggtaattttgcattagtatataagagaagaccgtcttcaagaggcatat(ATC)6	123	-	CGAGGCTTAAAAGGATGAATTG	CCTCCATGTTTTGGAGTTGG
chr1	28131862	28132216	c	(AT)18a(AT)9	55	-	TAGGGTGCTGAACATTTCCC	TAGGGTGCTGAACATTTCCC
chr1	28134052	28134427	c	(A)10tgccaatgagtgagaataagtaaaagttgaggtgccaatagatctt(TC)10	76	-	TCAATATTTAAGGCACGCCC	AAAAGGTTTGGGTGCCAATA
chr1	28135016	28135401	c	(AGA)5aatgggttcactgtgtgataggctattgggtgggttcaatgagaattagacac(A)18	86	-	TGGGTGGGTTCAATGAGAAT	CAAACTTGCGATACCCACCT
chr1	28136893	28137311	c	(AAT)6tgtttttcattgttgaattttatttcaaaatttgggtgttcggtaattgtctgttttaaacaccttggatcaagcttgaaaaacaattg(T)12	119	-	GATCCAATGAAATGGGGTTG	ATCCAACCACACAGCCATCT
chr1	28161131	28161483	c	(TA)12t(TA)14	53	-	ATATATATGGGGGCGGTTCG	GATGTTCGAATGAATCTGCG
chr1	28163958	28164351	c	(AT)12c(TA)15t(TA)19	94	-	GAAGTTTTGGAATGGGCTGA	TATGGGAAATATTCGGCACC
chr1	28164680	28165134	c	(T)11attatgcgagtttcataacggcataaccatcactttctccgggctacgagcatcaggtagatgaattggcatcggaa(TC)12aatagctcaacgacattgttaggttagg(T)15	155	-	CAGAACCAGCAAAATGCAGA	CCCGGAGAAAGTGATGGTTA
chr1	28169428	28169800	c	(A)13gagagacttctttgcagttagatgataaattcaatgatcatgtgctcaag(T)10	73	-	CCTGCTTCTATGTCTCAAGCTG	GTCCTGTGGAAAAATCCTGG
chr1	28174656	28175005	c	(TA)14(AT)11	50	-	AATGGGCTGATTTTTGGTGA	CAAGGGCCAACTTTTTAGCA
chr1	28188877	28189273	c	(GA)6ttttgacacaggctgtctgcttcaaagttttttcccttagg(GA)10(GT)12	97	-	GTGGGCTTTAACCCATCAAA	GCAGACAGCCTGTGTCAAAA
chr1	28194869	28195257	c	(A)10tcagaaaaatttaaattttagatggtatatctcgttgcttagtttttcaaattaaaaaaatatctg(T)13	89	-	AGGTCCAACTTAGGCAGTCCT	TGCATGCGTCGTAGTCTAGC
chr1	28204802	28205185	c	(GA)8(AG)34	84	-	ACATCCTCACAGAGCCTTGG	CAACCAAATCATGCCGTGTA
chr1	28208262	28208622	c	(TA)7t(TA)23	61	-	TGAAGAATTGTGCATCGTCC	AAAATCGGGAGTTACCAAAATATG
chr1	28210971	28211363	c	(AT)6gaatatgaaatctcatataataaatcataatctattcatcaataaaaaaatcattcacgtatccattt(A)13	93	-	TCCGAATCAAATTACGGTCG	TTTAAATGGATACGTGAATGATTTTT
chr1	28217950	28218316	c	(T)18ctaaatctgatccaagacaagattcttacatgccccacg(T)10	67	-	CAGCATAAAGCTGACGTGGA	AAAAACGTGGGGCATGTAAG
chr1	28227221	28227600	c	(AT)18(TA)11(AT)11	80	-	GCCATTGCCACATTAGTTGA	CTCACCAAAAATCAGCCCAT
chr1	28234565	28234929	c	(T)12caaaatggtgttcaaatacttaaattacttaatgaaaacttg(A)11	65	-	CCTCCTTGACCCTAAGTCAACA	AGATTTTTCCCCCATGATCG
chr1	28240658	28241088	c*	(GA)9ggtgtcaatggatagccgaagaagacattggttatggagttcgcaccacatgggttttaccgagag(AGA)6(AG)16*	131	-	ACCACATGGGTTTTACCGAG	GTAAATGGAACGACGATGGG
chr1	28304417	28304777	c	(T)10cgggtttatctttgctcgaactaggctaggacaaa(GT)8	61	-	TGCGTGTGATTTGTGTTTTG	CGAGCAAAGATAAACCCGAA
chr1	28308249	28308634	c	(AG)10atttaaaagaaaaattaatacttcagccatgtaaggatcattaggtagatctaagg(A)10	86	-	CGATCCTTTTGCCGTACACT	TGGATTTTAACGGTTGAGGG
chr1	28326812	28327173	c	(A)14tcaccacttgatggctgcaaattatgattt(A)18	62	-	CATGGGTTCAAGTCCAGCTT	AGCATTTTTGTGGAATTGGC
chr1	28331275	28331790	c	(A)10tggatttgatattttcttccattatggttttatgtaaaatatacatgtattacacgtgtaacacacgtgcactttactagtaaata(AT)14gaaaagaattcaggttagaaaattcg(AT)6a(AT)8a(AT)18	216	-	CGCCACCCTTAGTTTTACCA	GCTGATTTTTGGTGAGGATGA
chr1	28336775	28337198	c	(GA)13gggagatttaaaagaaaaattaatactttagccctgtaaggatcattaggtagatcagatctaagg(AAAT)8	124	-	CGATCCTTTTGCCGTACACT	TTTCGAAGCCGTTCACTAGC
chr1	28340430	28340795	c	(A)10tgagattttattttacggaaaactttaatagtcataacgaaaaag(A)11	66	-	CGTCATGTTGGAAATGGAGA	CCCAACGTGTTATCTATGGATTC
chr1	28345474	28345887	c	(A)10ccttgatctggcaaaattcttcttttacctttgtccttaattggcttcacgtgatcagcaaaccctctcttttttttaaccctaaaaaac(A)14	114	-	GTGGCATCTCTGCATCAAAA	GAGTGAGTGGGTGGTTTGGT
chr1	28358820	28359233	c	(A)35gaaaaag(A)10tgatttttgtgaaagttgaaaatagactcttttggatagaaaaatttaagg(T)11	114	-	GCCTAGGGATCTGGAACCTC	TTCATCGTTAAACTCTTCGCAA
chr1	28363996	28364350	c	(CT)11cgctc(TA)14	55	-	GCCACATAGGACAAAACACG	GGAGATCAAATGAATCACCCA
chr1	28408366	28408767	c	(CT)25atctttcaaaaaacaaaaacaaaattatttgaaaaaaaac(A)12	102	-	CCTGCTCTCCTCTCCTCTCC	GTGTCCCTGGCATCATAGGT
chr1	28416129	28416520	c	(A)18ctcttaattttgtttctttccaaaaccattcacattcaatcttgaacgcataattgaaagac(A)12	92	-	ACGTCAAAGTGTGCGATGTG	TGAATGTGAATGGTTTTGGAA
chr1	28423438	28423906	c	(TG)6ttttttttattttttattttttattgttattgagtatccgatcatcattttattgtattctt(TTA)5tcatcttttagagatctttgtgtgtttttttcttaattatccggtctttttttattgtgtgtttttttc(T)11	169	-	TGGAGATATCTTTGTGTGTGTGTG	GGTCTGCCTAACCCCAAAAT
chr1	28437674	28438104	c*	(AT)30(T)24*aaataaaattttggatgagttttaccatgaaatc(T)14	131	-	TTTAACACCTTGGTTCAAGCG	AGCCTCAGCTTACCGATCAA
chr1	28441211	28441601	c	(T)14aaatactcaatgtctacaagatcatgtcaaaaagattctattgacaaaaaatattt(A)10g(A)10	91	-	AAAAGATCTTGTTGACATTGAAGA	TCAATGGAATCATTTTGACACTG
chr1	28449788	28450234	c	(A)11tttatttttaggtcttgatccaaggtttggaaaatggaaagctactgaattcccagatttaattaaaacctagatggggttaaatgat(TTA)8tttttttattatta(T)10	147	-	CCAAGGTTTGGAAAATGGAA	TTGGCATCCAAAAACATGAA
chr1	28461748	28462115	c	(A)10cgtccttgatattgtcaagaatacgaaacaaaagcattcttctatgca(T)10	68	-	CAGGAGGATCCCATTAGCAA	GCACCTTTGGCAAGAAAGAA
chr1	28482409	28482775	c	(A)11caaatactagtcaacaaatttatattaaaatcccaagttttaac(A)12	67	-	TCCAATCGCCAACTACACAA	CCACATGCCTAAGTCCGATT
chr1	28488851	28489241	c	(GA)6gttcctagttccaactttcttctcttcggatgagggatgaaaagaaagacacataaactag(T)18	91	-	ATCTCCCATCTCCAAAGGCT	TTTTCATCCCTCATCCGAAG
chr1	28508058	28508464	c	(A)13ttaaacaattgatgatgacctcataaactaagactcttctctaatttcattgcaaacatgcttgtttctccctttaaatattt(A)11	107	-	AAAATGCAACAAAGCATGTCA	AACAAGCATGTTTGCAATGAA
chr1	28541996	28542393	c	(T)13ctttttcccagaaacaaatgatattttccttcttgctgctaaggtatgattatttgcaccagtcatggataagaa(T)10	98	-	CATGCTAATGGTGAGGTTTCAA	CCAGCACCGTACAACAAGAA
chr1	28546599	28546981	c	(A)10ctgtactccacccatcaagcttatctccccctcacttggatatcaagtgcaacaatgaa(T)14	83	-	TAGAACCCACCTTCACCGTC	ATTTAAAAGGCGCATGATGG
chr1	28548144	28548540	c	(ACC)5attacactaacctcgtcgttgtcgtcatcgccgtcgtcaacatcgccgtcggctccgtctccgaccacct(TC)6	97	-	TTGATTGCACATGGAAATGG	GTGGTGGTGGTAGGGAAGAA
chr1	28622755	28623117	c	(AT)19a(AT)12	63	-	TTTCATATGGCCCTTGATCC	TAGTTTGCCATTTAACGCCC
chr1	28628027	28628382	p2	(TC)28	56	-	CGACGTCACCTTCGATTTTT	CGAGGGAGACAGATCAAAAGA
chr1	28630614	28631083	c	(T)20atatcatagggtaggagaatatttagtttacgttttattcattatttttgcataccggtaagattggaaga(T)16aatatttctctatgtttttatttgttttgtgtaccaatagggttaagaaaata(T)10	170	-	CTCACATGCTTTGGAGGTCA	CAATCTTACCGGTATGCAAAAA
chr1	28639696	28640063	c	(T)14gaagcccattctctaataatttgatagtccagagccgtc(A)15	68	-	TCGTTCATTGTGATTGGTGAA	GAAATTTGATGGACCCTCCC
chr1	28644350	28644724	c	(T)16catttccattaatatttttgcatatagttatattt(A)24	75	-	GGATTCAATGCTGAGGCAAT	TCTTCTCCGAAATGTCCTCG
chr1	28657312	28657708	c	(A)11caaacctcaaatatcctcaaccgacatgttctgcaaagaaccataca(T)10ccatgtgtatcattagtgg(A)10	97	-	TGCTTTCGAAGGGTTCTGAC	CAGAACATGTCGGTTGAGGA
chr1	28663572	28663936	c	(T)10accttttaataaatttcttggttgctt(AATA)7	65	-	CTTTTTGTTTCCAAGGCGTC	ATTCAATTTACCGTGGGCTG
chr1	28665244	28665642	c	(T)11aattaaagacttcgaccctcatttagatactaacaccttctatttttatatgaggattgaagatgacgaaaatgtg(A)12	99	-	TGAGGATTGAAGATGACGAAAA	CAAATGCTAAAATCAGCCTTCA
chr1	28682700	28683076	c	(AT)8a(AT)6(TA)7tc(TA)16	77	-	GGGCTGATTTTTGGTGAAGA	CGTTCAATGGCCAACTTTTT
chr1	28728180	28728535	c	(AT)17agat(AG)9	56	-	TCAGCCCATTCCAAAACTTC	AACCCGACCCTCTCTCTCTC
chr1	28729587	28729944	c	(AT)18agat(AG)9	58	-	CTCACCAAAAATCAGCCCAT	AACCCGACCCTCTCTCTCTC
chr1	28740791	28741224	c	(TA)13aatataggaaactttggaagtgttttggcatatttggttttgttttgtttttgtttttttgttttttgtttttcgattt(TG)6tt(GTG)5	134	-	TCTCATATGGCCCTTGAACC	AAGGACCGCTACTTGCAAAA
chr1	28745383	28745807	c	(T)14acttagtacaaaaagtatttttcttctttgttccacgcattccaaagatcggtatgagatcaaaaggttatttaaatggaaaacccatggataaga(T)15	125	-	GTTCCACGCATTCCAAAGAT	GTAGTGGGGGATGGAATGTG
chr1	28772023	28772398	c	(A)10gtgttggacaatgctaatgtctctatgagatcttagacgttagcattccc(AT)8	76	-	GATCTTAGACGTTAGCATTCCCA	AACAAAGAAAATGAGATTGGCA
chr1	28773319	28773707	c	(TA)29attctaaaaaagaaaaaaaag(A)10	89	-	TGCTAAATTATTTCTTACACCCCA	TGTAGACAGCTATTGATCCCCC
chr1	28784081	28784441	c	(T)10gggtggggtg(T)20(G)21	61	-	AAAATTGGAGGGTTGGAAGG	CCAAGCCTCCTTCCTTTTTC
chr1	28794679	28795051	c	(T)10atgatgagtctatgattcaactatgttgatttacttggttctatgaataatg(T)11	73	-	TTGAGGGGAAAAAGAAAAGATG	TCAATAGAGCTTTGATCGTTTG
chr1	28803828	28804234	c	(TTA)10ttttgtatatgtagctctacaatggatgggtcaaacaataatcacatccactttagggtgaac(T)14	107	-	AGGGCTTTTTCCATGTTGTG	CCTTGTCAATGAAAGAGGGC
chr1	28805037	28805398	c	(GAG)8gggggagtcatgataatcggggga(G)14	62	-	AGGACCCCTTCTCCTCACAT	CCTCCTCCTCCTCCTCAAAC
chr1	28809872	28810269	c	(TC)8ccaataatcagattgaaaagtaaaaaagatattattaggaaaagaaaagtaaacttattaaact(A)18	98	-	TTGATCACAGGAAAGTGACCAG	TGTGCATCCAGAGGCAAATA
chr1	28810632	28810986	c*	(AAT)6aa(AAG)6(AAGA)5*	55	-	TTCACACGGTCCATTGTTTC	TGGATCCAAAGATTGACAACAC
chr1	28830670	28831025	c	(T)13agtttttatttttatt(TTG)9	56	-	AGCTTGATCGAAGGTGTTGAA	TAATCGCATTAACTTCCGGC
chr1	28842939	28843330	c	(AT)6tgtatcattgtcagtgtatgattggctcatcacattattttgtaagaaaaagtaactaacaaatatgaag(A)10	92	-	GCCTGAAAAACGGACCATAA	TGCATTTGAAAGAAACGTGG
chr1	28858417	28858819	c	(A)14ttaatgtgtaacaaggacttgggcccacaacctcaaagttgtttcgtaatatgtcaaatcaattgagctattagatct(A)11	103	-	GGGTTTGAGTGTCAAAGGGA	ACAACTTTGAGGTTGTGGGC
chr1	28862964	28863373	c	(AT)13(TA)12t(TA)14aatgaatgaaaaa(AT)9	110	-	TAAGTCGGTGAGAAGCAGCA	ATTGGGTTTGGTTTGCGTAG
chr1	28888358	28888765	c	(AT)20gcaaaggggaatgctaacatccaaaacctcatgtccatgttagcattatcaaatac(T)12	108	-	ATCAGCCCATTCAGAAGCTG	TTTGGATGTTAGCATTCCCC
chr1	28946959	28947374	c	(T)10gtgaattatttgtgttcctttcatttacgtgagttcatctcaaattttggattttctatcgattttatttatttttcttgatttaagtttagatc(T)11	116	-	TGATTTTGGGGTTGAATGCT	CCGCCAAACAGAGAGAAATC
chr1	28956888	28957262	c	(A)14gatttcaacaattgcaaacgctcaatcaacacctaaataaagg(T)18	75	-	GTTGGGGTGCCAATAGAAAA	GAGCGTTTGCAATTGTTGAA
chr1	28994255	28994673	c	(A)12tcaactcatcataaacaacacaaagagttttcttgtaacagaggggagttaccgtgaacaggtcgttcatctcgattgaat(GA)13	119	-	GAGGGGAGTTACCGTGAACA	AATGGACTCGCTTTCTGCTC
chr1	29034613	29034963	c*	(AAG)5aaat(GA)7(AGA)7*	51	-	TCATTTGGTACCTATAAGGTGGG	TAGCCGATGCCAAAATGACT
chr1	29055344	29055802	c	(A)12taccagggagcaatgtgaaaagtttgggtgaaaaacaggggtagataaactttaaatataaatataa(AT)7ttacatttaaagtttatctacccctgtt(TA)9(GA)10	159	-	TTCAACTCCATCTTGAGCCA	CTACCCCTGTTTTTCACCCA
chr1	29059182	29059568	c	(T)14cttttttttatgaaaaggaaatagaaattgattttattttccaaatagttgaaaaat(TA)8	87	-	CGTTGTGCATGAAAAATTGG	ATGGGCTCAATCCACTGTCT
chr1	29066970	29067322	c	(GA)12attaagcttatattgatgg(A)10	53	-	ACCAAGCAAAGTCCCCTTTT	ATTGCTTCTGGCCAATGTTC
chr1	29067859	29068330	c	(A)10tgaaatttacctgagaactagcattattatcatctctctttcttgggttcatatccgacagtctaaattcactaatctgttg(A)15tttaaatatcatttttaattaaacgcacatcaaattaatatcaaagaaggaaata(T)10	172	-	TCTTGGGTTCATATCCGACAG	GATCATGTTGTCGGGTCGAT
chr1	29072168	29072554	c	(T)10aaacatccactatgcctgattggggtaggtatgggggtatttttaaga(T)10(A)19	87	-	GAGGACAGCCACATGCATAA	ATACCCCCATACCTACCCCA
chr1	29095318	29095823	c	(TC)6ctctctctctacataaatgccattgcaccatctatacgctctgcaattactccttgctgccacatcttctccatctgttcccctttctccttctc(TCT)7ttcttctttcttttctctttcatcaccatctttcttttgaaggttttttcatagcttctt(TC)9	206	-	AAACGTATGGCTCAGATGGG	AAGATGTGGCAGCAAGGAGT
chr1	29095852	29096302	c*	(C)17(CT)8*tttattttttac(T)12acagaaaaaacaggtgggagaaagagaggaagaagaggtgaagtgtttgattctccgaaatattcataggtgttgccc(T)17	151	-	CAGGTGGGAGAAAGAGAGGA	CTCAAAGGGGGTTTGTTTGA
chr1	29096455	29096846	c	(CT)11cattcttccttgtttcctttgcagtttctaagtttctatttctcacttgtgtgaa(T)15	92	-	CGATCCCAGCAAGAAGAGAG	GAGGGATTATGAAGCGCTGA
chr1	29108138	29108542	c	(T)12atctttttcaaatttcaataagtaaatttatattaatattcataattttacctta(AT)19	105	-	CCCTCGACTCTGTGATGGAT	AAAAACCTTGGAATATGCCTAAATAA
chr1	29108853	29109226	c	(T)10aacatagcttgttgcggtctgctatctgcctaaacctaatcttttccctcaaag(A)10	74	-	GCATGGCCTCAATAATTGGT	CAGATAGCAGACCGCAACAA
chr1	29116067	29116500	c	(A)16gttctgttttttggttattctccagtcattattatctattaggggttcgtgatgcgtcagttttggtttaattcttaaggtatatacc(TAGAAT)5	134	-	AGTCCTCCCCGAGATCAGTT	TCTGGATCGTTCGTGTTTCA
chr1	29120574	29121025	c	(A)12caataaacacgttttaggcattttcacatagtcaccttttcttcgcctatataacaccctttctactccacgatccaaggtatcaaactcta(TC)6tacgatccaaggtatcaa(TC)9	152	-	TGGTCGTAGAATGACGTTCG	CCGGACGCTCTTTTTCATTA
chr1	29129695	29130084	c	(A)10tcaataaaattccagagattatacaaaatatattattggatttcttaccaaaacctattatcatcaac(CT)6	90	-	CATCAACTTGGTTAATTCAGGAAA	CGAATCAATCAACGATCCCT
chr1	29135209	29135580	c	(TA)7t(TA)7t(TA)21	72	-	AATGTCACCCTAGGTGCGTG	ATTCACATCAGAAATGCCCC
chr1	29140684	29141093	c	(AAT)5accaatacacaattaactataattataactaattacaataatagtagtaataataataacaataatcataaaaaaaatag(TAA)5	110	-	TGACGACGACAACAACAACA	TTGGAAAGAAATTGAAGAAGGC
chr1	29170741	29171155	c	(GA)8tctactattggcaccccaactttacctattacaccccattcacttttatttttattttcagttggggtgtaataccagctc(T)18	115	-	CTCGGTCAAGTAGCACACCA	TCATGTTTTCGGATTCCACA
chr1	29180499	29180947	c	(A)10gcattagtttattcgtaaaatatcactaatctataccctaactcctaaaataattcataataattattacatacatatc(TA)17(GA)13	149	-	TCGGTTCTCGATTTGTTTCG	TTTGGGGTGGTTTGGAATAA
chr1	29194574	29195068	c	(T)10aagctctcgattttagagttgctcttagtcattccatcaaacatcaaccaggtagat(AG)9ggaaaagaccaaatcaaatccaatcaaaggttacttcattacgggtttgattttaataatgcatggattatgcacttttgtttttggtaaaaattg(T)14	195	-	TCCATCAAACATCAACCAGG	TTGGGAATCCAAAATCTAGGG
chr1	29223591	29223993	c	(T)14aaaaataataattaaaatgcacctgcctaggcattcattgaactaattttttacataggcatagttttgtttat(A)15	103	-	CAGGCTTACCTTGGCTGTTC	GCCTAGGCAGGTGCATTTTA
chr1	29228327	29228686	p2	(TA)30	60	-	CACCAAAAATCAGCCCATTC	TCTCATATGGCCCTTGAACC
chr1	29230071	29230596	c	(T)12gggataaaacatcatcttcaaaacccatcatatttaaccttcttaaaaatcatatcttgttcttaagat(A)10caggaagaaaaagcgagaagaaccctcttcttcatatggtaaaaactacaaaatttacaagggtaacaattacaaccc(A)15ctgatttctttaaaattgtctaagt(A)17	226	-	GAAAAAGCGAGAAGAACCCTC	CATCGCCGTCAATCTCTTTT
chr1	29230559	29230958	c	(GA)6acgagtgagcgagagaa(AG)8atggcgccaaagtgaaacttgagagagagatgggttttcgagc(GA)6	100	-	AGAGCTCCGAAGACGATGAG	TCTCCCTCACAAAACCCAAC
chr1	29230887	29231258	c	(AT)23(GT)13	72	-	CTCGATCTAACGCCCAAAAA	CAAGAGTGGATGGGGATTTG
chr1	29250669	29251082	c	(GT)9ataaattgagggttcaaattggtgaggagatcatcctgacaaaacaaaaacaaaaaaataaaaaatcagcccaattcgaaa(C)15	114	-	CATGACCTAACCCAGCCTGT	TTCGAATTGGGCTGATTTTT
chr1	29254965	29255402	c	(AT)8taataagaaaccttttctttatatgccaaattttggacaagactaata(AT)37	138	-	CGAAGAATGGAATACCCACG	ATGGCACTCAGCCCATTAAA
chr1	29291256	29291632	c	(A)13tgatttattgcacaaaatcaaagttttctattataatccaaagttt(A)18	77	-	GATTTTGGACCCACCAAGTG	TCTCCCTTCACAATTGCTCC
chr1	29296012	29296441	c	(TA)17tttttggcaatttgatctatttgaggactgtcatatatatattttttccaatacatcaattaaagacacagaacttcacaatga(T)12	130	-	GACTCGTGATGGATGCTTTG	TGCAAGTCCATCACAAAATCA
chr1	29306012	29306367	p2	(AT)28	56	-	TTTTTGCATTTCTGCAAGGAT	CGTCCTCACACAAAATCAGC
chr1	29342522	29342879	c*	(AT)7(T)12*gggggggtggt(G)22	58	-	AGCTTCATGCCTCCATCATT	TACCTGGATGGTACTCCCCC
chr1	29344932	29345299	c	(A)18tttacttagaattttacttaaaatgtgataatattcaca(T)11	68	-	ACAGTCAAACTCGGTCCAGG	TCAAATAGGGGTTTTGGCTG
chr1	29364038	29364455	c	(AAG)5agttgaagatgtgcaagagtttgtttcctcagttacggctactacagttatgttatctatcagaactaacatgcttctactc(AGG)7	118	-	GAAGAGGAGGGTCAGGGAAC	TTCTTCCAAATTAGGTGCGG
chr1	29372481	29372875	c	(TA)24tttctttgtttgcttgtttgtgtatgggttga(GGT)5	95	-	AGACGTTCCCGCAAACTCTA	TGCCCATCTTTCCTTTCAAC
chr1	29376324	29376823	c	(TA)25t(TA)28(GA)15aaagtttctatggcattccaacttctatttattctcaatcattggttga(T)14	200	-	TGGTAAAACTTAGGGTGCCG	AGAGAGCTGCTATTGGCTCC
chr1	29383121	29383533	c	(A)12tatccattttgagtttgttccaaggtattaaaaatggatggctacaaaactttcaaatttaaatttaaagtttaacagaaaattaattg(T)12	113	-	TAAAATTCGCAATTCCCCAC	GTGGCGTCCAAAAACAAGAT
chr1	29397779	29398199	c	(AAG)6agttgaagatgtgcaagactttatttcctcagttacggaaactagatttagagtctctatcagaactaacatgcttctactc(AGG)7	121	-	CTATGGCTGCGACAAGTTGA	TCTTCCTCCTCCTCCTCCTC
chr1	29398172	29398595	c	(AAG)7agttgaagatgtgcaagagtttgtttcctcagttacagacactgtggttacgtaatctatcagaactaacatgcttctactc(AGG)7	124	-	GTGGAATTGCAAGAGCATGA	GTTCCCTGACCCTCCTCTTC
chr1	29445928	29446293	p2	(TA)33	66	-	CGGTCCACGAATCCTCTAAA	TTCATCCGAAGATCCACCTC
chr1	29453258	29453670	c	(A)10tcctttttgagtttgttccagggtattaaaaatggatggctatcaaactttcaaatttaaatctaaagtttaacggaaaactaattg(T)16	113	-	CAATCCCCCACCACATACTT	TTCGTGACGTCCAACAACAT
chr1	29456671	29457082	c	(T)14ggcacttttagtgtcgatttgataattataaaaaatatattac(T)11ataataatttgttttttagtttttagtttttag(T)11	112	-	GCTGGGAGCCAACATGTAAT	CAAATCGACACTAAAAGTGCCA
chr1	29459848	29460245	c	(A)12gtgaatgattgagaagaagtaaaattggggagccaatagaaactctttcttttttcgacaagattataattaattc(T)10	98	-	AAAGCTGCTATTGGAACCCA	AAAAGTTTGCCATTGAACGC
chr1	29464246	29464660	c	(AAG)6agttgaagatgtgcaagactttatttcctcagttacggagattggatttacgtaatctatcagaactaacatgcttctactc(AGG)5	115	-	GAGGAGGAGGAGGAAGAGGA	AACTCAGGTGCGGTATGAGG
chr1	29494837	29495257	c	(T)16aatatgaaaattttcatgaaatctaaaaaactttgttgttggattgtcaatgtcggcccaatgactctttttgatatttgaaattgaaatt(A)14	121	-	GGCCCAATGACTCTTTTTGA	TCGCCCTATTACAAGTTGGC
chr1	29513065	29513497	c	(AAG)6agttgaagatgtgcaagagtttgtttcctcagttacagacactgtggttacgtaatctatcagaactaacatgcttctactc(AGG)11	133	-	GAAGAGGAGGGTCAGGGAAC	TTCTTCCAAATTAGGTGCGG
chr1	29525835	29526249	c	(T)10cttgccctttgataggtttgtatttcttttctttcggttggtccccttgaccttcgttttgattaatgaaattatctttacctatatatattt(A)12	115	-	GTCCCCTTGACCTTCGTTTT	ATATGGAGCTGAATGCCGAC
chr1	29530090	29530446	c	(T)13cactataggtaggagagagaaactc(T)19	57	-	TCATCGGAACGTGATTTTGA	CACACCTAACGCACCATGAC
chr1	29548434	29548798	c	(T)22aagattaaaagggggttaggtagactcccaac(A)11	65	-	TCATCTTTTGTGGTGGGTGA	GACACTCCCGGGCATAGATA
chr1	29557318	29557717	c	(T)10catctatgtgatgtgtcatatattggaaacaagtcgttgagactctcctactaacaccgtggagatagcatcctcttcg(A)11	100	-	TGGGTGGAAAAGAACTTTGG	GGATGCTATCTCCACGGTGT
chr1	29569731	29570104	c	(T)10gtcagaattcaagttaatcagatgatgttacctatgggatctgcagacttc(T)13	74	-	TAAAAACATGGGTGGTGGGT	CGGATCCAATGCAATTTTCT
chr1	29573137	29573541	c	(CT)9gcctctctgtctctcttctcctctcaatttccctccctgcc(CT)23	105	-	TCCTCTCAATTTCCCTCCCT	TTTTCCCGCAAACACACATA
chr1	29579289	29579645	c	(T)16ctacgaatgatcttgcggttgatttttgaga(T)10	57	-	TTCACTTGATTTGACGTGGC	TCACAAGTAGCTGGTTCCCC
chr1	29586649	29587006	p2	(TA)29	58	-	CATCTTCATTCGGCCAGTTT	TGGGTTGTTTGGGTTGAAAT
chr1	29615366	29615754	c	(T)10caagggtatatcttcaaaatacaaatgtggtgatttaaatttcaaatgccataat(AATA)6	89	-	GCAAGTGCAGTTTCAACAGG	GTTCCATTTTTAGGCAGGCA
chr1	29624536	29624914	c	(T)15catttttccaaaaacaccttttacaaatttctctattgttttttctc(T)17	79	-	TGCCATTTTCCAATATTGCTC	GTTGGCATCATCTTTGGGAT
chr1	29648446	29648849	c	(T)16aaattttaaaatttcaataattataataactggtcaccaattgccaaataagtctgtggttcttatttctct(A)16	104	-	TGGTCACCAATTGCCAAATA	ACTTCAACATTGGGCCCTC
chr1	29675447	29675812	c	(T)10cctctttttcataattgcaacttaaatggtgatgaaggtgc(T)15	66	-	TCATGGCTACTGAGCTCCAA	ACAGGCAAGTGAGGCAAATC
chr1	29681609	29681986	c	(GT)11gaggggggagggaagatgttccatgagaatctctttat(GA)9	78	-	TGTGTGTGTGTGTGTGAGGG	ATTCCAACCCCCTCTTCTGT
chr1	29685243	29685672	c	(G)11agcattttgtagccgcattccatcagtcattagttatgtttttgatcaatttgggcgtatgattggggttattgatgggccggtcctcagcccattaatt(G)19	130	-	TGATCAATTTGGGCGTATGA	CTTTTGCCTCGGGTAATTCA
chr1	29691584	29691964	c	(A)10tccaaataacagagatgttattgaatctatgaagtatcaacatctatagtttcttgta(T)13	81	-	TCTCTCTCCACCCGTGACTT	GACTTCCAACAAGACTGCCC
chr1	29693280	29693652	c	(A)17tgtcaagcggatgagaataagtaaaaattggagtgccaatagaaac(T)10	73	-	TCAAATTGCATGTTTTGGGA	TCTCATCCGCTTGACATTTTT
chr1	29749880	29750235	p2	(TA)28	56	-	ATTTTTCCAGGATGATCCCC	CTTTGCGACACACCATTTTG
chr1	29763948	29764324	c	(AC)24aaagtgtgtgt(GA)9	77	-	AAATCGCCAAAACACACACA	AGCAACCTTTGAGTCGAGGA
chr1	29769214	29769591	c	(T)11cttcgtccctccctctctcttctctttcttaacgcttcctcttctttcac(A)17	78	-	CAAATGTCAATTCACCCCCT	AGAGAGAGGGAGGGACGAAG
chr1	29808767	29809136	c*	(TTTA)7(TTA)5*ttttttttt(G)21	70	-	GCAATCACCAAGCTGAGGA	CCCTGGGGTAAAATATTGGG
chr1	29834093	29834512	c	(A)10caagaaggtacttttataatagtaataacaagaaaatccttaaataatgtatttaata(AT)14(GT)12	120	-	GTGTGTGTGTGTGTGTTGGG	TGAACAAGCATTGCAGAGGT
chr1	29836532	29836915	c	(AG)11cagagtggagtaagtgtacgtgtctaggagactgtaaagtataaatcgtt(CG)6	84	-	ACCAAATCCAAACCAGGTCA	CGATGATCATGCCACGTAAC
chr1	29861112	29861516	c	(A)10tccttctatatttttaatccacaattcagtttctttaattgaagattcacattaattatttttatttaacttatatttaaaagg(A)11	105	-	TCCTGGACCAGAACCCTTAT	CAACTGTGTGCAATTCTTTGG
chr1	29882054	29882408	c	(CA)16a(TC)11	55	-	CCTTCGTCTCCACAGCTCTC	CAATCATCATTGGGTTGAGAAA
chr1	29892798	29893150	c	(AT)12accattttattaacaagtc(T)10	53	-	CCACCAAATTTTGAGATGCC	CGTGTTGTTAAGGGGAAACG
chr1	29895116	29895616	c	(GA)8agggattatctgtcagccgccaaccactgaagttgagaggcagcccgcaacaccttaacttgcaagagacgagacgagac(GA)6ggaatatccgtcagtcaccagcgactagccgtcggagttgagaggcagcccgtagcacctcagcttgcaagagat(GA)9	201	-	ACTAGCCGTCGGAGTTGAGA	TTTGATTCGGTTCTCGGTTC
chr1	29896089	29896516	c	(AAT)8atatggtttcggtacacattccacaagtgtatttgagtttcttttttatttgtttatttaattaatttagtattattcttatttttat(TC)8	128	-	TGGCCCGACGAATAAATAAG	CCCAAACTCATGACCCAAAT
chr1	29911966	29912386	c	(A)12gtaaaaagaatgaaaaattgtgtttctttcccttccccacaac(A)10ctgaacatgtataataatcccactttttttgggggggaaatt(A)14	121	-	CACATTCAAGTCCAGGACCA	GGGAAGGGAAAGAAACACAA
chr1	29927538	29927952	c	(T)17gggcttccaaggaataaactcttagacgttcttttaattcgaggataattttatgatccaacaatgttcgacactcctatttgagatg(A)10	115	-	TCGACACAATCCAAAAACCA	TTGCCCCTACTCCAAGAGAA
chr1	29935396	29935768	c	(A)11gtcattttcaaacattgtaaagatgtatgtaaaaaaactaagattttttcac(T)10	73	-	TCCCTAGACCTCATCTCCCA	TTCTTGATCGATTTTCATCCAA
chr1	29956703	29957056	c	(ATA)9gtaatg(ATA)7	54	-	GCTTGAACCTGCATGAATGA	CAGGACTCCAAATTGGTTGG
chr1	30031616	30032033	c	(T)12aagtcaaaagagtaaatacatcgatttcatttggtagcttagaaaaattgaatggttcatttacttaactccaattctttgagataaaact(TGA)5	118	-	GTAAGAGCTTTTGGGCCAACT	CGAATCCTCCAATGATAGGG
chr1	30051724	30052135	c	(T)16ggttaacatgtgcgataagggcacacgtttaggtgcattaaatacaacttgaaaattgaatttcttgcaaaaataccttcaaaaga(T)10	112	-	TAACATGTGCGATAAGGGCA	TCAAAAGGCCTTGTTAACGC
chr1	30054993	30055389	c	(A)15ttaatagaactggactttgtttcaggaccaacccggttcattagaaaaaataaaaatcaatccactaaatca(T)10	97	-	TTTTAGAGGCCATCTCAGCC	TTTCTAATGAACCGGGTTGG
chr1	30107337	30107758	c	(T)15ggtgtggttttttcaactaatcagaatggttcattattagatcacggcatttgattctccaaatacatttgtgtgtttgtgttgtttt(G)19	122	-	CGAGATCATAGCATTGGGGT	ATTTGGAGAATCAAATGCCG
chr1	30126646	30127052	c	(TG)7ctgtatgtcaactctttttgtctacattcttctacaattaaggttctagtactgcaatgtagaacccat(GA)12	107	-	GCGTATGTGTGTGTGTGTGC	ATGATGGCCAAATTGGATGT
chr1	30151339	30151695	c	(T)10ccaccaaaagttttgaattttctcaacaaaaaaacc(A)11	57	-	CCTTGACCATGGTATTCTTGG	GGGTGAATATGATGGGCTTG
chr1	30173622	30174019	c	(A)11tcacgaattaaacaggagattgcaactaagggtcaacaatatcgtca(AT)20	98	-	GCATGTCCACGTCAGAATTG	GGGGTTTCTCGGATGAATTT
chr1	30183202	30183575	c	(CT)16(CA)21	74	-	TCACACACACACACACACACA	AAGCAATCTCACGCCATCTT
chr1	30184257	30184636	c	(TC)22tacagacacacagacagcagac(AG)7	80	-	CAGACACACAGACAGCAGACAG	AAAACCGGGAAACCCATTAG
chr1	30193708	30194177	c	(AG)6gaaaaatataagattcat(A)10ttatttgtcaatactcaatagattttgacaaatacaattgatgatgaatgacgcatgtctaattgtgtgacaataaaga(AT)13ttt(G)22	170	-	TAAGCGGTGAGAGTTCGTTG	CACATCACATGCACCACGTA
chr1	30202180	30202560	c	(TGC)5tacctaaagttcttcctacaccctgaaatgcaacctgacgcttctctggttcctgg(A)10	81	-	ATGCAACCTGACGCTTCTCT	TTTACTCCCCCTCCCTCACT
chr1	30209515	30209865	c	(A)10gattaaaaagttttaggtcaatag(T)17	51	-	TGCCCAACAGAATTTCCCTA	GCCTGGGAATCTCCAGTTCT
chr1	30218211	30218586	c*	(G)12tcagcccccaccccattactcttat(A)13(AAT)5*(A)13	76	-	TCTTACGTCCCCACTTTTGG	TTGGATGAGACCCAAAATCC
chr1	30238089	30238459	c	(T)10cttgcaaacatacacgtcctcaattaccaaagaaaattaaaaccaaatca(T)11	71	-	TGCAAACATACACGTCCTCAA	GCAGAATCTTCTTGCCCACT
chr1	30247315	30247681	c	(AC)6aatacaatgtatctcacataataaaattactaaatgaaaggaa(AT)6	67	-	TGGCATTGAGTCAAAGTTGG	TGTACAGAAGGCCAGAACCA
chr1	30252184	30252534	c	(TA)9tgttagttttatctcat(C)16	51	-	CAAAGGCTTTCTTTGACCCA	TATTCTTAATTGTGCCGGGG
chr1	30272735	30273090	c	(T)10ctctactaatctttgttgtcttcttttaact(TTC)5	56	-	TTGTCGATGCTGAAGAGGTG	CCATGGAGGGTTGGAGTCTA
chr1	30272919	30273303	c	(TC)7acacacatacaaaaactcattgtctctgtttttcattaatggttttgtgctttttcttgca(T)10	85	-	AACCCTCCATGGGGTAACAT	CCTCACCAAAAGAAACCGAA
chr1	30273235	30273613	c	(T)14atatactagattgatcctaattgggttttagttaaaatactattt(TTTG)5	79	-	TGTGGGTGTTCCAGTAGGGT	GGTAAAACACAGCATTCCCC
chr1	30278619	30278989	c	(T)11gtttttttggaccatatatttgtgtttggtttagttcattagcccccccc(T)10	71	-	CTTCCCCATATTTGCTGCAT	TGACAGGACCGTGATGAGAA
chr1	30284031	30284394	c	(T)10ctcgggatgcataattatggagatacgcagtttgtatcccaaag(A)10	64	-	ACTCTCCTGACGAGGCATGT	CCTATCCTCTCGTGGCATGT
chr1	30300419	30300913	c	(AT)55tattttaagttgtgaaggtaaatcatacatgatctttacatggttgagatggtaagggcacagaactataaatc(T)11	195	-	GGTTGAGATGGTAAGGGCAC	TTGGTATGCAGTTGAGGTGG
chr1	30317307	30317701	c	(TGT)5tgggtgtccaccaccgcctccacccttctttcttctccctcctgatttccccatctctctcc(CT)9	95	-	AATTTTCAAGAGCACCCACG	GGGAAATCAGGAGGGAGAAG
chr1	30324869	30325236	c	(A)15cagggaagaaaaataaatataggatgagaaagcaagtgag(A)13	68	-	CGTAAACCGTTCGAGATTCC	TTTTCTCACTTGCTTTCTCATCC
chr1	30367418	30367800	c	(T)10gtaaatcgcagatggatataaactggggatactccctgggttacccct(A)12c(A)12	83	-	TGAGCGGTGACATTACCATC	TTTAGGGGTAACCCAGGGAG
chr1	30371532	30371924	c	(TCA)9tcgtcataattttttatgtccaccatcacgtctttcccatcaaccactc(A)17	93	-	ACCTGGCACGTGTACAATCA	GGTGGTGGGTTGGTGTTTAC
chr1	30373499	30373972	c	(TA)7gggtcccgttcaatggctaattttttggcaaaacattttttaaaacatgagttagaagttttggaattgactgatttt(TGA)5tctcctgtttgaaaaatgttttgccaaaaagttagcgattaaacactaccc(AT)8	174	-	TCCCGTTCAATGGCTAATTT	TATTGGGCAAATTGTTGGGT
chr1	30374256	30374759	c	(A)10ttaaagtgtaataaataaaatttggagtgccaatagcacctctatgtctctttctttcatttgaaggaagt(TTA)6ttttccatgtagtttgaatagatttagggcacgaagctcattgaagataataggagttaggtactataaattattttatttcaatttaaa(AAT)5	204	-	TTTAGGGCACGAAGCTCATT	AACCCACAGGAAGCAGTACG
chr1	30377222	30377582	c	(TC)12gatctattaatcttgaaattttcctat(A)10	61	-	AAGGCAACCATTCCTCCTCT	TTGGTTTCTTGATCCTTCCG
chr1	30387585	30387970	c	(TA)34tc(TG)8	86	-	TCTCATATGGCCCTTGAACC	GAAAATGTGTGTTTGCCCCT
chr1	30393473	30393824	p2	(TC)26	52	-	AACTGTTGCTAATGCCACCC	TCGGTACTCTTGCCACATCA
chr1	30426092	30426516	c	(A)10tgttagaacttaaaaagggagctaaaatggaagtagaatagaaataggttcgaacgtcgtccgatttttttc(T)15(G)28	125	-	CTTGCTGCTTGAGCTTGATG	TTGACCTGTGCACAAAATCC
chr1	30429134	30429561	c	(A)15ttcaatcaatataaatcatgttaaatggattgtctcatccgattctagacggcaaaccgacttttgaaaccatggtaaaaccacgtactttcaaaaaaa(AT)7	128	-	CTCATCCGATTCTAGACGGC	AAAGACGAATTTGCCCTTGA
chr1	30448465	30448824	c	(T)11caaatcattataaaactcttttctttaaaataaaaaaac(A)10	60	-	TTCTTGTCAATTACGGGTTCG	TCATTCGATTTTTGAGAACTGG
chr1	30456287	30456675	c	(A)10tctaaaacttaatattcattgatttaacctttcacaaaactcaaaaagacatgaatatg(GA)10	89	-	GCAATCAAAAACACAAAAGGG	TTTGCACACACCAAAGTCGT
chr1	30456952	30457351	c	(T)10ctgctagtttgaagaatctagtttttttttccggcatttctgcttcaaggattttgtgatcttatctactgtgttaggga(T)10	100	-	GGCATTTCTGCTTCAAGGAT	TTTTTGCCTGATTCAAACCC
chr1	30471203	30471570	p2	(TA)34	68	-	TTGACAGAAACATTGCCTCG	ACCTGCGCGATTATCACTTT
chr1	30488112	30488501	c	(T)16ctgttttatttgtgttgtatcgatccaagtatgtttatgaaacttggtgttattttatcaa(T)13	90	-	ACATAGCCGTCGAAGAATCG	GACCTGCTCCAACGAGAATC
chr1	30488629	30488995	c	(T)10aaaattagcttgattataaaatgaaatatcgtgattttttattcat(A)11	67	-	GTGCTTAAGAGTTCCAGCGG	AACCCACAACCAAACACCAT
chr1	30501741	30502115	c	(AG)7atacatacaagagaagagaggatgaaaactaagttatgtgtggtatata(AT)6	75	-	TTTGGGTTCCTGTCATGGTT	TTTGTCCACTGATCCCTTCC
chr1	30516129	30516533	c	(A)20gacaataaagtgggattgtgtgaatttcatttatttgtctcaatttttattcgcacaaaactatagcaattga(AT)6	105	-	AAGGTGGGGAGGAGAAGAAA	TCAATTGCTATAGTTTTGTGCGA
chr1	30522300	30522727	c	(C)10tccccgccaaca(AT)53	128	-	TCGACCTGTTGTCAAAAATCC	ATATATTGTTGGCGGGGAGG
chr1	30528231	30528649	c	(A)25tccttttagaactcaaggggttagaaaatgaatgattattgaactctcagtttttaaataaaaattcaacgagggaaaa(ATT)5	119	-	AGCAAATCAAACCCGACAAC	TGCATCAATTTATGACATCCAA
chr1	30544607	30545102	c	(TA)37actttttagcctcaaactaccaaacataccattgtgtgaagagttcgttttttcatgggaatcccaaataatatcttcccatcttcccccaccccctcca(T)10cc(T)10	196	-	TCTCATATGGCCCTTGAACC	TTGACGTTCTCCCACAAACA
chr1	30557737	30558087	c	(GA)10a(AG)15	51	-	TGGTTTGATCCATTTGAGAGTC	CTCGTCGGAAATCAAAGAGG
chr1	30558305	30558689	c	(TA)8cttcggattggttcagttctattatacctctaatccaaaaccaaaccaaatcaatcgga(T)10	85	-	CTCACCAAAAATCAGCCCAT	CCGAAGTCTTTTGGATTGGA
chr1	30573526	30573919	c	(CT)12(AT)35	94	-	CATCATTAGCGTGTATGGCG	GCAACCTCTATCCATGTCCAA
chr1	30576835	30577190	c	(TC)16(TA)12	56	-	TTTCCTGTTGTGACAGTCATCC	CTCCTGGGCAAGTCTATTCG
chr1	30585613	30585968	p2	(TA)28	56	-	AAAAGTTTGCCATTGAACGC	AAGGATGTGCGATGTGAGGT
chr1	30588932	30589352	c	(T)13acagaaaattaaaaatgaattttcaccattatttataaatcttactaagattaaatttcatttttcaaaaatgaaatccaacttatcatcctt(TTC)5	121	-	TTCTCCAACAAGATGCAACG	ACAGAGGTGGAGCAAGAGGA
chr1	30603876	30604284	c*	(GA)47(AGA)6*	109	-	TGTGAACCCAAATCCTTCAT	TGTCAAAGGGAAATTGGAGG
chr1	30606694	30607267	c	(T)11ataaacaaaaccctcttctactg(TC)6ggcgtgaggcgtgagactgcatgcgtgcgactgcgggcgtggtctcaactccagtggccggctgtcttcct(TC)22ggcgtgcggttgaaggcgtacagctgtagatacctctcatggaaattgggttttgtagttttggtttaatttttttcgataacttttagaaaccttattg(T)13	274	-	GAACCAAACCGAAAATCGAA	CGCCGAGAGAGAGAGAGAGA
chr1	30624933	30625327	c	(GA)6gggaaggaggttgtttggggaagttttaacgaaatgatcatgtggtaatctgaatctatggat(GA)10	95	-	AGGAGGTTGTTTGGGGAAGT	AGCTATTGTCCACCCAATCG
chr1	30626993	30627408	c	(G)25tgaattgcacaaagaatgaaaagaaaataaaagaaatgggaaaaaaagagccatgcacaaaattcttaatagcatt(G)15	116	-	CCAGGTGGTTTGTTAAAGGG	TTCTTTGTGCAATTCACCCC
chr1	30637818	30638210	c	(A)10cgaatttttttttaaaaaaaattttctctctcttcattcatttctctcacccctttctctctcctattatttt(A)10	93	-	TCTCCTCGATTTTCCTCAAGA	GGAGAGAGAAAGGGGTGAGAG
chr1	30656280	30656639	c	(AT)6agatatatttggattttgatggcttagttaggcg(T)14	60	-	GTTGTTACAATGCATCCGCA	GAGGAAATGGAGTTCATGGC
chr1	30693730	30694123	c	(T)13acatgagtatagtatagtccaatgcatcaagttttgagtttataccatcgtat(TA)14	94	-	TCCAATGCATCAAGTTTTGAG	TTGCAAATGCTTGCTTTCAT
chr1	30709491	30709882	c	(A)11gaactttaatcacttcatataaggcataaaaattggacaacttccctagtatgcaaacaatggaaaac(A)13	92	-	AACCATGAGGACATCTTCCG	TTTCGTTTCATGGTTTTCCC
chr1	30709936	30710350	c	(T)10ctttttcatttcttcctgattttgaatttctttttcttctgttttttcttgttttcactgatttctacttactttctcaatgactg(T)19	115	-	TTCAGTCAACCAAGCACCTG	GGTGTTAGGCCCTCTGCTTA
chr1	30724235	30724637	c	(T)10attattaggatgatcttcttaccataaaaatagtcatcataaaaaatcagctcattctaaaacttttgcccatattttac(A)13	103	-	TGATGGTCCACGATTCTTCA	TTGAGGATCGAATTCAAGGG
chr1	30725340	30725731	c	(T)24aatcaagtccatcaagaaagctaatcaaaccaggtttatttgtttttaaacttagaag(A)10	92	-	TGGTGGCATTATTCATGTTGA	CCAGCAGTCCTCTAATGCAA
chr1	30729224	30729609	p2	(TA)43	86	-	CGAACCTGAGTTGAGAGCAA	TTCCATGGCATGTTTTTCCT
chr1	30737331	30737705	c	(T)10attgtcaaactcaccattttttattttatctagttcaacattaaaatgcacttc(T)11	75	-	TTGGGGCCATAGCTTTATTG	TCGATCAACGATGATTCTTTTG
chr1	30788443	30788851	c	(TTC)5ccttctctagggtttacagtttctcttcgtcttttagggttacagttcgggattttagtcttcagatctgtaattttctacagc(T)10	109	-	CTCTCAGTCCCCACGCTTAG	TGAAGGATGAACAACGCAAG
chr1	30820549	30820930	c	(A)10tttgttcatataagacaaaacacattgtttagaatgttgtccacagatcccgaccctc(TA)7	82	-	AATGTTGTCCACAGATCCCG	CTCACCAAAAATCAGCCCAT
chr1	30829882	30830243	c	(T)13atagatttttttgtttttgtttttgttttttttg(T)15	62	-	TGCCTTCTAGGTTTTGGTGAA	CTTGTATTGGCACCCCAACT
chr1	30858506	30858945	c	(AT)7aaataattaattaattaatcattaaaaaaaagaaattataatattttttgtttaaatgttttacttttatcccacttttttactcttt(TC)19	140	-	TGGGCTAGCTGTAAAGAGCG	CCGGAAATTTCTGTAACGACA
chr1	30885999	30886383	c	(G)16tagcttgggcaattaatccatcttcatgctctctcctctcaactaattcgttttttg(T)12	85	-	GCTTGGGCAATTAATCCATC	TGCCGATGAATTTGACCTTT
chr1	30897130	30897501	c	(T)13aaagtttgaagagacactccattcctattggattacgtggc(AT)9	72	-	GGAAATCCAATGGTTGGGA	GCATTTGAGGTTGTTTCAACG
chr1	30917203	30917596	c	(T)10ctcttccgctccctaactttgaaacaacctcaaatgcaactattaaataattattaataaaaataatataa(T)13	94	-	GGATAGTCGATTGAGTTCGGG	TTCAAAGTTAGGGAGCGGAA
chr1	30966913	30967321	c	(T)11gagatattctacatgttttaaaatgccattctccccgactcttgatttctcaatagttgaaagatcttttttgttcttattattag(A)12	109	-	GGGTTTTTGGCATAGAGCAA	AACTCCAGGTCATGAAACCG
chr1	30979034	30979470	c	(AG)11ttatttttaaagggctctcacacgatgataattttgtaaataattttttttataatcatttactcaccccttttgcccttaagtggaaaaaaaga(AG)10	137	-	GGCTCTTAGGGAAAAGCCAC	TGTTGCCACCAGAGATGTGT
chr1	30998700	30999099	c	(A)16tcaatttcttgatgaattaacagtgaaaatttgattttgttttatcaaaatttagattattaaattaaaattt(A)11	100	-	GGGTTTGATTCACCTCTTGG	TTCTAACCGAGTGTCCGAGC
chr1	31009311	31009697	c	(A)12cgatagtcagaaagagcagctgtaaattaaaatgctcccataaaataatgctgttagggg(A)15	87	-	TTTTAAAGTGCGCAGTGGTG	ACATACGCACCCATCCTTTC
chr1	31018448	31018858	c	(GA)10(GT)9gcaagaaagaactgtatatttgtagagtcacgaaaatatttgacttcta(AG)12	111	-	GTCTGGGTGGTCGTTTATGC	CGATTCCCACAAACACCTTT
chr1	31048739	31049117	c	(A)10ttgacagttcacattctaaatcacttttaatggggttagaagttttagattggactga(T)11	79	-	TCCAGATGATCTTCCCATCA	GGGAATGGATCAAGGGACAT
chr1	31070669	31071042	c	(T)13caagaaaactatttcaacttttttatcttcctatctcataatacattttac(T)10	74	-	AGGTAAAGTTGGTGGACCCC	AGATTTTGCAGGGGCATCTA
chr1	31073810	31074215	c	(A)10caaaaaaagaatagaaaaactcattacttgtaggcatcaatgagataaatgttctatatttattaattctctcaagtcc(T)17	106	-	TGTTTGGGAAGCTATTGATGG	CTTTGCGCACTTGATTCGTA
chr1	31075870	31076245	c	(TA)9atttattataaatttatttcaattcttcgatatatttttgagc(A)15	76	-	TCACTTCCACATCATTTCCAA	TGCATGGATGTTCAATAGCG
chr1	31121796	31122220	c	(A)10tcatggatgaaatagttgtcttgaatgatgactttgactggacacgtggcagttttctgttgatttaatagcttaacatcgtttgattattaacat(A)19	125	-	GCTAAGCGGTTAAACCAACG	CCACGTGTCCAGTCAAAGTC
chr1	31125491	31125850	c	(A)10ttcttttaagagatattaagcaaagagtaggtt(A)17	60	-	GACCCCAAGTCACAAAAATACAA	CACAATTCAAATTGACAATGCTT
chr1	31148424	31148837	c	(T)14attcttctttttattcaacagtattgaagctgaaatatatgtctaactttggtgacattttcgatcatgaacaaccatatcatagcttc(T)11	114	-	TCAACAACTGGTGATGGCTT	CATGATCGAAAATGTCACCAA
chr1	31181007	31181418	c	(A)11ttcacaaaaaaatttatgtttcaacattgaattttaattttaagtaatcgtccactttcaaaaccttggatcaagcttggaag(ATT)6	112	-	TAACAAGGGTCCTTGGAGCA	CAACAATCCAACACCCACAG
chr1	31195323	31195708	c	(A)11ttatagaaaattttataattctacagatttcaaattcatgattcaattcaaac(TG)11	86	-	TCAAACTGTGTGTGTGTGTGTG	TGGAAGGAGTGAACAAAGGG
chr1	31197957	31198319	c	(T)19aatgactttttatttatgtgctttcctccccc(CT)6	63	-	CCGTAAATCTCATGGAACCG	GGTTGATTCGGGTTAGAGCA
chr1	31212652	31213037	c	(A)11ttatagaaaattttataattctacagatttcaaattcatgattcaattcaaac(TG)11	86	-	TCAAACTGTGTGTGTGTGTGTG	TGGAAGGAGTGAACAAAGGG
chr1	31215287	31215649	c	(T)19aatgactttttatttatgtgctttcctccccc(CT)6	63	-	CCGTAAATCTCATGGAACCG	GGTTGATTCGGGTTAGAGCA
chr1	31229988	31230373	c	(A)11ttatagaaaattttataattctacagatttcaaattcatgattcaattcaaac(TG)11	86	-	TCAAACTGTGTGTGTGTGTGTG	TGGAAGGAGTGAACAAAGGG
chr1	31232624	31232987	c	(T)20aatgactttttatttatgtgctttcctccccc(CT)6	64	-	CCGTAAATCTCATGGAACCG	GGTTGATTCGGGTTAGAGCA
chr1	31241118	31241484	c	(AAT)5aaagaaaataaagagagtacaaagagagagttgaaattga(T)12	67	-	ATTTGCATTGAAGGACGAGG	TCATATCTGGATCCCCCAAA
chr1	31250084	31250447	c	(A)14(TA)25	64	-	TGGTCTCAAGTTCAAATCCCA	ATAATGAAGGGTATCCGGGC
chr1	31253579	31253948	c	(AC)6atagatagatagatatatacat(AG)18	70	-	TCCCAAATCGCAATAGTGAA	TTCGTCATCAAGGAGACGTG
chr1	31254051	31254412	c	(A)11caaaaactaaaaaagggctatagtagctttc(TAAA)5	62	-	TCCTCACAGCCCATATTGTTT	TTTTGAAACATTAATCCCACGTC
chr1	31284991	31285453	c	(AG)26atacttgatcgactatccgtcatcatctgattttttgacattttggtggtggcatgcaggggagaaatgggtaaaggaccttggatgcttagggaatt(A)13	163	-	AAACTCCCATGCTTTGAACC	TCCTTTACCCATTTCTCCCC
chr1	31322050	31322453	c	(T)11caatctgtgaggtgggattgaagtgaccccctcacccctcccccacgacagataaataaatctgtcactattggctccacaa(T)11	104	-	TGTGAGGTGGGATTGAAGTG	AGGGGTGGAGTGAGGATTTT
chr1	31323598	31323984	c	(G)27ttgcgtatcgttgacgcaaagtgcaatcttattagaggtttgctttgaaa(T)10	87	-	ACTGGCACTCCGCATACTCT	GCACTTTGCGTCAACGATAC
chr1	31338914	31339302	c	(T)10acttgttaacactaccattcaggacgaacgagtccactcagtttcgagtctgtgagttgagtcgattg(A)11	89	-	ACAAAAGAAAAGCGGCAGAA	GTGCTCATTCCCTGTCTGGT
chr1	31361285	31361654	c*	(TC)10atttttttttcaagttcatgcattta(GTT)5(T)11*	70	-	TCTGTGGGCTTCTCATTGTG	GTTTGAAGGCCACCACATTT
chr1	31367905	31368260	p2	(TC)28	56	-	GTGGGGTGTCTTATGGTGGA	ATCCATACCCCAACATCTGC
chr1	31385261	31385666	c	(GA)9aaaagagagagctgtactggg(A)14gcatctcaaccctctagtaatcatgacttatatttaattt(A)13	106	-	GATGTGGAAGGAGGGTTTCA	AGGATTCGCTAACAACATTGC
chr1	31386116	31386477	c	(GA)12(GT)19	62	-	AAGGCATTCTTGGATGGTTG	GGTTGCCTGAGTGAAACACA
chr1	31393426	31393843	c	(TTC)6tttcatagatccaacaccgaccaacgattaaaaaatgtgatgtgatcttgatgcaactagccgacaagtggcgggatcatccttttttc(T)11	118	-	TTCTTGAATCGAAAAACCCG	CTTGTCGGCTAGTTGCATCA
chr1	31396362	31396764	c	(T)10aaacaaaaatatgccttacataaaaatgggttcaatgaatgtttagacccgggtattttaattattattttaaaatttattt(A)11	103	-	AGGGTTCATTTACCCCCATC	CCCGGGTCTAAACATTCATT
chr1	31403866	31404255	c	(GA)8atctgcgtttccaatcttcggatctccgaatcttctgtaagttttttc(T)12aa(T)12	90	-	TGGAGGGAGGGAAAAAGAAT	GACGAAATTTCAAAACCCCA
chr1	31414039	31414428	c	(GGT)9ggggcttctactggtagaccaaggtaggtttaggtcaatattatt(ATG)6	90	-	TTTCAATGGGAGTGGGATGT	TTTCCTGACCCAGCACTACC
chr1	31414908	31415441	c	(AG)8ggacgcaccgtcgacacagccgcaatcgtagacgct(GA)6gggggggacacaccgtcgacacagtcgcagccgcagacgct(GA)11ggggacgcaccgtcgacacagccgcagacgct(GA)9aagggggggacgcaccgtcgacacagtcgcagccgcagaagct(GA)7	234	-	AAGAGCCAAATTCCCTCCAT	GACTGTGTCGACGGTGTGTC
chr1	31417744	31418125	c	(T)10aaatatctaattgggcataatataattaagtgaactttataattattaaggaagggctttt(A)11	82	-	TGTTGCTTCCTTTTGTGTTGTT	TTTGTTATTATGGTTCAATCCCA
chr1	31456685	31457130	c	(TC)6tatcgctaacagaaaatcaataaaatacgagaccgaacaaatgtgcgagatctgtgtgagaccgaacagctgtgcgcagctgtctgg(GAAGA)5agagaagt(AG)7	146	-	ACAGAAGCAGCCCTCATTGT	GGTCTCACACAGATCTCGCA
chr1	31498214	31498609	c	(T)10aatcgataaatttgaggtcaaggggacttcacccttcattggaatcagacaaaatcttacaaacgatgattt(A)14	96	-	GGACTTCACCCTTCATTGGA	CACGTTAACACCAGATTTCCTG
chr1	31507779	31508154	p2	(TA)38	76	SSR-7	TCCGGAGCTTTTTAGCCATA	AGGAGGCGTAAACCTTTGGT
chr1	31529545	31529912	c	(TC)8tgaagactctcgggaggtctctctctagctccga(T)18	68	-	TAGCAAAGGTGGGTAGGTGG	CAGCAGTAACTAGCGAGCCA
chr1	31537424	31537845	c	(A)11tttaagg(A)11tattgagcttgatcaaaggtgtagaaaaaggatggttaccaaactcccttcaaacaaaaaataaaaataaaaaat(A)18	122	-	AATTGGCAATCCAACACCAC	GTTTGATGCCACAGGGTTTT
chr1	31559849	31560273	c	(T)16gcattttagagctgggatctttattttgt(TA)33(T)14	125	-	GGAGCTTTGCTTTTCACCAC	TTTACCACACGACCAGCAAA
chr1	31573470	31573825	c	(TGA)7cgacaacaaggatctattac(TTA)5	56	-	ACCCCCAATTTTTGGGATAA	TTGGGGTTGAAAAGCACAAT
chr1	31578901	31579352	c	(GTG)5gcggaagaggtaagggatgaagaagaagaaggagaaagagaaga(AG)7aaggtggtcggagacggagtcgacggcgacgacgatgacgacgattgcaaggttagtgtaatga(TGG)5	152	-	TAATGATGGTGGTGGTGGTG	TCCACCCATTCAAAAAGTCC
chr1	31594795	31595211	c	(CT)10cacaatatccaatatccacagacaaacccaatgctttctgacgctcgctcttcttttcttctcttttatttccttga(CT)10	117	-	TGGCTTTGACCACTCAACAC	AAAAGAAGAGCGAGCGTCAG
chr1	31596207	31596587	c	(A)16cagagattcaaaaggtctgcaatatttttttgtagaggttgtattg(T)19	81	-	CAGAGATTCAAAAGGTCTGCAA	GCAAACCAAAATCAGGAAAAA
chr1	31606412	31606780	c	(TTTA)5tccatcaaacaaacaattgagatgttaggaactttcaag(A)10	69	-	TCGACAACTTGGAAGCCTTT	TTGAGGCTCTCCATCAAACA
chr1	31624895	31625298	c	(A)10caaaagaaagaaagaaagataaaatagaagaaggaaatcaaaagaaggaatatttcttcaaatgtccataattttgttattt(A)12	104	-	AAAACCTCATTGGCGTTAAAAA	TGAAAGGCCACCACATGTAA
chr1	31632729	31633091	c	(T)10ctttctatg(TA)22	63	-	TATAGGGTCCCGTTCAGCAA	CTCACCAAAAATCAGCCCAT
chr1	31633316	31633668	c	(G)40t(G)12	53	-	TGCTATGAATTTCTTGGGGC	CACCCTTTGGGTGGAACTAA
chr1	31641318	31641753	c	(A)10ttaattacactttaatctagtttaacactaactaatcttttagtgctctctatataaagagtacttcttcattcacttccattccaccaccaaatcatca(TC)13	136	-	ACTTCCATTCCACCACCAAA	CCCCCTACAACACAGACGAT
chr1	31645413	31645827	c	(A)11ccaagctttttgctgatattttaaatttttactataaaaatatgcaataaatagaactgttttcttttattttttactggtcccca(TC)9	115	-	AACGAATGGAAGATGATGGG	AATTCGAATCGACCAACCAG
chr1	31649871	31650288	c	(A)12ccaagctttttgctgatattttaaatttttactataaaaatatgcaataaatagaactgttttcttttattttttactggtcccca(TC)10	118	-	AACGAATGGAAGATGATGGG	ATTCGAATCAACCAACCAGC
chr1	31651873	31652293	c	(T)14aaatgaccttttcaacccctaacttaggaaaattatcatataaatggcccacaacctaagtaaaaaatcatcaaaatcggaagaaatgcaaacaaag(A)10	121	-	CCCTCAACATTCAGCAACAA	TTTGTTTGCATTTCTTCCGA
chr1	31660072	31660441	c	(TA)11ttaatatatatata(AT)17	70	-	TGGGTACTTGTGACCGTCCT	TCTCCTACCCACACGTCCTC
chr1	31704703	31705062	c	(TG)6cgtgtgtttatgtt(TG)8agaa(AG)7	60	-	TTGATTTTGGTCCAAGAGGG	ATTGCATGAAACAAAAGGGG
chr1	31712912	31713275	c	(T)15aatatttctacaatttcctttgtagtttattttt(TTC)5	64	-	TGAATTTTTGCGTTCCATTG	TGCTATAATGGCTTGATTTGGA
chr1	31733084	31733498	c	(AC)6gcgcacg(CA)7cgcacagaaac(AG)9aaggggagaagcagaggagatggagaatcaaataaacatac(AG)6	115	-	TCTCATCGTCGCTGTGATTC	ACCCCCTAAAATCTTCCCCT
chr1	31746109	31746524	c	(T)13aaacagaattttaaagaattgatctcatattagaacacaggagtcttcataagatgagaggtaaaaaccagagtttcataactttgatttgg(A)11	116	-	CACACAGTACCCAGTTTTGCAT	CCCTTGAATGCAAGAGCTTTA
chr1	31752626	31753041	c	(TA)6tttaaatctcacttttataacccttattttaacttcgaattaatgcccatgctaaaggtttcaaagtaaatacaagtatcctatttgataa(T)13	116	-	GCCCATGCTAAAGGTTTCAA	AATCCCAGTCCCTTAGGCAT
chr1	31761169	31761530	c	(T)10aacattcaaatatc(AAG)5atagg(AT)9	62	-	TGCGGTAACGTTTTTACCCT	TCGCAATGTGAGTCCCAATA
chr1	31764015	31764370	c	(T)17ggcataaaaaatccttaaaaaaag(A)15	56	-	TTCAAACAAAGAAACCCTCCA	TGTCGATGATTCTTGACCTGA
chr1	31879027	31879432	c	(T)10ggagttttcttctcctatggggaaatagctttagaacacgtgtaacataatctaagaatcctctccaaatgtactggattcacac(T)11	106	-	TTGACTCTTTGCACTGCCAC	CCCTCTTCTTCACTCGTTGC
chr1	31888424	31888806	c	(TC)7tactacgtttttacaggttg(AGA)6aagaagtctttcatttatc(A)12	83	-	GCATAGCAGGGTGGAACAAT	CAAAAAGAAAGTGCGGCAA
chr1	31911318	31911737	c	(T)12ctttctcttctctccattttttttaatccaaacacaactaactcttttatataatagaaaaagttaattttaaaataaaacgcattatcttaa(T)15	120	-	GTGGGTTCACCAAATCCAAC	TGGTTATTTAATGCGTGTCCA
chr1	31921905	31922257	c	(CT)8acttcgtttttacaggatg(AGA)6	53	-	CTTCATAGCATAGCCGGGTC	AAACCAGAGCAACCTTCCAA
chr1	31944220	31944642	c	(CT)12tttgttgtataaatgtcttgtattctattggcagtacctaatttttttaggattacgagaagaataattgtgtaatattttcttaaa(T)12	123	-	CAACTCGGTCATGGGAGTTT	CGTGTCTAGGTTGCCAATGA
chr1	31994632	31994987	p2	(TA)28	56	-	TCGTCCAACGAGATAACTCAAA	CAGGCATGGAAAGAGGGTTA
chr1	32002181	32002554	c	(A)11tgttgagtcccttggaattagaattaaaatttctataaattaaagtaatata(T)11	74	-	AAAAATGTTGAGTCCCTTGGAA	AAGTGGCAACACCCATCTTC
chr1	32004774	32005165	c	(T)10aacagatgaattttaactttaaatttgggagtttggctgactttttcaacaccttggatgaatttcaa(T)14	92	-	TAAGGATACCATCCGATGCC	ATCGTTGCACCCAAATGAAT
chr1	32013282	32013683	c	(CA)6aaataaataaataaataaaagaaccttcctatcagatttcagtacatggcattt(TG)8ttgggta(G)13	102	-	CTTAGTCCCCACCCACACAC	CCCTACCCAACACACACACA
chr1	32080475	32080840	c	(TC)10gacagaacgactgaaaacctgagt(TC)11	66	-	CTCGCTAACGGAGAGACACC	ATTCTCCGTCTTCAGCGAAA
chr1	32084461	32084822	p2	(AG)31	62	-	CCACCAAATCTGAATTCCAC	CACGCCACATTCCAGAAGTA
chr1	32127020	32127422	c	(TAA)10taggaaa(AAG)7aaaaagaagaaaagaaatgaggatggggaagg(T)13	103	-	TGAGGATGGGGAAGGTTTTT	CAATCCTGGCCAACTCATCT
chr1	32127974	32128431	c	(GA)9aagagagaaagagaggaagtatgtttggatgctcttcgaccgaagaagacgatggttacggagctcacaccgtcgaaaaaataggttttacc(GA)24	158	-	ATGGTTACGGAGCTCACACC	TAAACTGCACGAACCAGTCG
chr1	32128305	32128762	c	(AT)15tcgataatatccacttcgatataatatatatattatgtattcatgttttacaacaag(AT)14aaattcttgttgtaaaacatgaatacata(AT)7	158	-	CGACTGGTTCGTGCAGTTTA	GCGAAATCCGATTCGATAAT
chr1	32129110	32129496	c	(G)22cacaaattaaactgtacaaacattgcatttgttttgcttggatga(TC)10	87	-	GGAAGTGGGGATGGAAGAAT	AGCCTCTTGTTCCCCAATCT
chr1	32167676	32168151	c	(A)18cttcataaatcatgacacaaaactcaaatagtattgtgggaaaatcattagggcttacctgat(TA)6ataaattagtttcataattaatatattctctattcaacatcaaatcactaattaaaatt(TAA)8	176	-	CGCATGTGAATTTGTTGGTC	GCCCTAATGATTTTCCCACA
chr1	32212894	32213253	c	(A)10cgataaaggatcatacatggaacgatataaaagcaagg(A)12	60	-	GGACATGCAATGGTAAGCGT	CCTTATTGGTGCTGCAAACA
chr1	32216469	32216904	c	(T)19gaaataggaaaaattcaataatttatattgattttacaagtttggaatctcca(T)10gttataaaagatttcatcccccaaacgctattttaga(T)17	136	-	CACCTTTTCAAGGGGAATCA	CTAAAATAGCGTTTGGGGGA
chr1	32230589	32230942	c	(T)12caaacccatttatcaatgatccatg(A)17	54	-	TCCGACGGATATTCAAAAGAA	TTGAGGTTGGAAATGAGGGA
chr1	32232827	32233205	c	(A)17ctctaaatttagaagttatgtattagtccgttctttttagtttttt(TC)8	79	-	ATGGAATGAATCTGCAGAAAA	GGCTTAAAATCATCAAAGGCA
chr1	32243782	32244198	c	(A)16cccttcacgttagcatctaaggttttgagacattaaaaaattgttagtatcttatcttggatgttagtatttctctataaataaaatcaa(T)11	117	-	TTTTACCAACAAAAACGGGG	CTCCCAAACACCTGGTGAAC
chr1	32250244	32250674	c	(A)23caaaaaaacaaaaaaacaaaaaaaaatgacccatatgttgtattattaaaaaaatctaaatcatatcgatgctcctatccccaccaaaaa(AAT)6	131	-	GAGATCAATTGTGCCATGGTT	TTTTTGTGGGGATAGGAGCA
chr1	32252343	32252715	c	(A)13gttgcttacctgtgtgagttgcagagatgaatccttgattatcagatc(AG)6	73	-	AACCGGATGATTTTGTGGAG	GTGTTTGGAATGGGTTGGAC
chr1	32260108	32260469	p2	(TA)31	62	-	GGGTGCTGAACATTTCCCTA	CTCACCAAAAATCAGCCCAT
chr1	32265363	32265772	c	(A)10tgttattattatattttagatttgatcttaagtcttaaaaatggaggactactgagctcccaaaatcaaaattaaaattccatggtga(AT)6	110	-	GGGGAGTACAGGGTGTCTGA	GTCGAGTTCTACGTGTGGCA
chr1	32282761	32283118	p2	(AT)29	58	-	TGCAATTACCCTTTCAACGA	CCAAAAATCAGCCAATTCCA
chr1	32283559	32283916	p2	(AT)29	58	-	TGGTAAAACTTAGGGTGCCG	CTCACCAAAAATCAGCCCAT
chr1	32283970	32284335	c	(AT)11(TA)22	66	-	GAAGTTTTGGAATGGGCTGA	ACGCACGAGAAACATAGGCT
[truncated: 34,162 more rows]

## Sheet: Table S4
Supplementary Table 4. Amplification results of 100 SSR markers
	Amplification band	Polymorphism	Allele number
SSR-1	Yes	Yes	4
SSR-2	Yes	Yes	2
SSR-3	Yes	Yes	3
SSR-4	Yes	Yes	1
SSR-5	Yes	Yes	8
SSR-6	Yes	Yes	2
SSR-7	Yes	Yes	7
SSR-8	Yes	Yes	3
SSR-9	Yes	Yes	3
SSR-10	Yes	Yes	5
SSR-11	Yes	Yes	3
SSR-12	Yes	Yes	2
SSR-13	Yes	Yes	7
SSR-14	Yes	Yes	4
SSR-15	Yes	Yes	2
SSR-16	Yes	Yes	8
SSR-17	Yes	Yes	2
SSR-18	Yes	Yes	5
SSR-19	Yes	NO	-
SSR-20	Yes	Yes	5
SSR-21	Yes	Yes	1
SSR-22	Yes	Yes	6
SSR-23	Yes	Yes	2
SSR-24	Yes	Yes	5
SSR-25	Yes	Yes	2
SSR-26	Yes	NO	-
SSR-27	Yes	Yes	2
SSR-28	Yes	Yes	3
SSR-29	Yes	Yes	5
SSR-30	Yes	NO	-
SSR-31	Yes	Yes	4
SSR-32	Yes	Yes	2
SSR-33	Yes	Yes	1
SSR-34	Yes	Yes	4
SSR-35	Yes	Yes	5
SSR-36	NO	NO	-
SSR-37	Yes	Yes	2
SSR-38	Yes	Yes	3
SSR-39	Yes	Yes	1
SSR-40	Yes	Yes	3
SSR-41	Yes	Yes	4
SSR-42	Yes	Yes	2
SSR-43	Yes	Yes	1
SSR-44	Yes	Yes	1
SSR-45	Yes	Yes	4
SSR-46	Yes	Yes	1
SSR-47	Yes	Yes	5
SSR-48	Yes	NO	-
SSR-49	Yes	NO	-
SSR-50	Yes	Yes	3
SSR-51	Yes	Yes	3
SSR-52	Yes	NO	-
SSR-53	Yes	Yes	4
SSR-54	Yes	Yes	9
SSR-55	NO	NO	-
SSR-56	Yes	Yes	11
SSR-57	Yes	NO	-
SSR-58	Yes	Yes	3
SSR-59	Yes	Yes	2
SSR-60	Yes	Yes	4
SSR-61	Yes	Yes	1
SSR-62	Yes	Yes	6
SSR-63	Yes	Yes	3
SSR-64	Yes	Yes	9
SSR-65	Yes	NO	-
SSR-66	Yes	Yes	5
SSR-67	Yes	Yes	10
SSR-68	Yes	Yes	5
SSR-69	Yes	Yes	2
SSR-70	Yes	Yes	8
SSR-71	Yes	NO	-
SSR-72	Yes	NO	-
SSR-73	Yes	Yes	4
SSR-74	Yes	Yes	11
SSR-75	Yes	Yes	4
SSR-76	Yes	Yes	2
SSR-77	Yes	Yes	1
SSR-78	Yes	Yes	12
SSR-79	Yes	Yes	2
SSR-80	Yes	Yes	2
SSR-81	Yes	Yes	7
SSR-82	Yes	Yes	9
SSR-83	Yes	Yes	2
SSR-84	Yes	Yes	2
SSR-85	Yes	Yes	4
SSR-86	Yes	NO	-
SSR-87	Yes	NO	-
SSR-88	Yes	Yes	4
SSR-89	Yes	Yes	5
SSR-90	NO	NO	-
SSR-91	NO	NO	-
SSR-92	Yes	Yes	3
SSR-93	Yes	Yes	7
SSR-94	Yes	Yes	2
SSR-95	Yes	Yes	5
SSR-96	Yes	Yes	2
SSR-97	Yes	NO	-
SSR-98	Yes	Yes	3
SSR-99	Yes	Yes	3
SSR-100	Yes	Yes	6

## Sheet: Table S5
Supplementary Table 5. Characteristics of different types of SSR motifs between 7 plant species
	Akebia trifoliata	Aquilegia coerulea	Amborella trichopoda	Arabidopsis thalian	Oryza sativa	Papaver somniferum	Vitis vinifera	Universal SSRs
Genome length (Mb)	652.8	306.52	706.33	119.67	374.47	2715.53	486.2
Total number of identified SSRs	434293	133819	404949	50092	135845	563800	297452
Si-nucleotide repeats (SNR)
A/T	278534 (95.76%)	88881 (94.76%)	204990 (95.96%)	34483 (98.97%)	56049 (86.28%)	400351 (96.71%)	203536 (97.47%)	1760 (95.81%)
C/G	12334 (4.24%)	4917 (5.24%)	8622 (4.04%)	360 (1.03%)	8912 (13.72%)	13616 (3.29%)	5285 (2.53%)	77 (4.19%)
Subtotal	290868 (100%)	93798 (100%)	213612 (100%)	34843 (100%)	64961 (100%)	413967 (100%)	208821 (100%)	1837 (100.00%)
Di-nucleotide repeats (DNR)
AT/AT	11292 (53.35%)	2947 (37.9%)	13018 (21.89%)	994 (52.58%)	3751 (41.02%)	5851 (67.04%)	4557 (66.36%)	13752 (81.30%)
AG/CT	41454 (36.59%)	10213 (47.82%)	111417 (69.93%)	3454 (36.8%)	15724 (41.93%)	14893 (23.62%)	13638 (25.18%)	2851 (16.85%)
AC/GT	60450 (9.97%)	8096 (13.8%)	34872 (8.17%)	4935 (10.59%)	15383 (10%)	42265 (9.28%)	35943 (8.41%)	311 (1.84%)
CG/CG	103 (0.09%)	103 (0.48%)	13 (0.01%)	3 (0.03%)	2639 (7.04%)	33 (0.05%)	24 (0.04%)	2 (0.01%)
Subtotal	113299 (100%)	21359 (100%)	159320 (100%)	9386 (100%)	37497 (100%)	63042 (100%)	54162 (100%)	16916 (100.00%)
Tri-nucleotide repeats (TNR)
AAT/ATT	1930 (45.19%)	1851 (14.97%)	1328 (34.07%)	733 (7.9%)	500 (4.47%)	4941 (20.41%)	631 (75.31%)	146 (55.73%)
AAG/CTT	5169 (21.24%)	7208 (43.86%)	4602 (18.68%)	2619 (46.8%)	1842 (6.15%)	21023 (25.79%)	2884 (10.89%)	64 (24.43%)
ATC/GAT	11000 (10.93%)	2460 (9.43%)	8392 (20.99%)	442 (15.76%)	1339 (2.6%)	16635 (10.4%)	19937 (4.5%)	8 (3.05%)
ACC/GGT	2198 (9.03%)	1746 (10.62%)	629 (2.55%)	241 (4.31%)	1785 (5.96%)	10536 (12.93%)	707 (2.67%)	22 (8.40%)
AAC/GTT	211 (7.93%)	27 (11.26%)	165 (5.39%)	68 (13.1%)	2489 (1.67%)	108 (6.06%)	65 (2.38%)	8 (3.05%)
AGG/CCT	362 (2.27%)	609 (2.47%)	3427 (2.86%)	98 (6.27%)	489 (13.26%)	471 (2.23%)	183 (1.92%)	5 (1.91%)
ACT/AGT	235 (1.49%)	564 (3.71%)	196 (13.91%)	128 (1.75%)	2528 (1.63%)	17299 (0.58%)	296 (0.69%)	4 (1.53%)
AGC/GCT	552 (0.97%)	406 (3.43%)	705 (0.8%)	351 (2.29%)	3970 (8.44%)	1819 (21.22%)	509 (1.12%)	2 (0.76%)
ACG/CGT	2660 (0.87%)	1550 (0.16%)	5171 (0.67%)	882 (1.22%)	778 (8.31%)	8480 (0.13%)	1190 (0.25%)	3 (1.15%)
CCG/CGG	24 (0.1%)	14 (0.09%)	17 (0.07%)	34 (0.61%)	14218 (47.49%)	197 (0.24%)	70 (0.26%)	0 (0.00%)
Subtotal	24341 (100%)	16435 (100%)	24632 (100%)	5596 (100%)	29938 (100%)	81509 (100%)	26472 (100%)	262 (100.00%)
Tetra-nucleotide repeats (TtNR)
AAAT/ATTT	3019 (68.94%)	402 (26.48%)	2121 (48.79%)	37 (21.89%)	239 (9.27%)	1721 (49.05%)	4374 (67.97%)	34 (53.97%)
AAAG/CTTT	291 (6.65%)	338 (22.27%)	171 (3.93%)	41 (24.26%)	186 (7.21%)	517 (14.73%)	444 (6.9%)	7 (11.11%)
ACAT/ATGT	211 (4.82%)	51 (3.36%)	154 (3.54%)	15 (8.88%)	387 (15.01%)	155 (4.42%)	326 (5.07%)	12 (19.05%)
AAAC/GTTT	178 (4.06%)	168 (11.07%)	41 (0.94%)	34 (20.12%)	48 (1.86%)	211 (6.01%)	217 (3.37%)	1 (1.59%)
AATT/AATT	142 (3.24%)	43 (2.83%)	25 (0.58%)	4 (2.37%)	138 (5.35%)	114 (3.25%)	488 (7.58%)	1 (1.59%)
AGAT/ATCT	130 (2.97%)	136 (8.96%)	98 (2.25%)	7 (4.14%)	613 (23.77%)	101 (2.88%)	163 (2.53%)	3 (4.76%)
AGGG/CCCT	95 (2.17%)	22 (1.45%)	308 (7.09%)	1 (0.59%)	89 (3.45%)	43 (1.23%)	88 (1.37%)	1 (1.59%)
ACCC/GGGT	63 (1.44%)	8 (0.53%)	38 (0.87%)	0 (0%)	23 (0.89%)	36 (1.03%)	23 (0.36%)	1 (1.59%)
Others	250 (5.71%)	350 (23.06%)	1391 (32%)	30 (17.75%)	856 (33.19%)	611 (17.41%)	312 (4.85%)	3 (4.76%)
Subtotal	4379 (100%)	1518 (100%)	4347 (100%)	169 (100%)	2579 (100%)	3509 (100%)	6435 (100%)	63 (100.00%)
Penta-nucleotide repeats (PNR)
AAAAT/ATTTT	293 (30.14%)	38 (10.44%)	289 (23.21%)	4 (7.69%)	18 (2.96%)	423 (32.66%)	621 (55%)	1 (33.33%)
AATAT/ATATT	289 (29.73%)	1 (0.27%)	87 (6.99%)	0 (0%)	45 (7.4%)	57 (4.4%)	43 (3.81%)	2 (66.67%)
AAAAG/CTTTT	67 (6.89%)	15 (4.12%)	89 (7.15%)	2 (3.85%)	124 (20.39%)	171 (13.2%)	215 (19.04%)	0 (0.00%)
AAGAG/CTCTT	46 (4.73%)	53 (14.56%)	60 (4.82%)	7 (13.46%)	34 (5.59%)	24 (1.85%)	5 (0.44%)	0 (0.00%)
AAAAC/GTTTT	43 (4.42%)	27 (7.42%)	14 (1.12%)	13 (25%)	6 (0.99%)	226 (17.45%)	37 (3.28%)	0 (0.00%)
AGGGG/CCCCT	37 (3.81%)	5 (1.37%)	52 (4.18%)	0 (0%)	46 (7.57%)	1 (0.08%)	12 (1.06%)	0 (0.00%)
AAGGG/CCCTT	35 (3.6%)	2 (0.55%)	12 (0.96%)	0 (0%)	6 (0.99%)	2 (0.15%)	3 (0.27%)	0 (0.00%)
ACCCC/GGGGT	26 (2.67%)	9 (2.47%)	61 (4.9%)	0 (0%)	8 (1.32%)	22 (1.7%)	10 (0.89%)	0 (0.00%)
Others	136 (13.99%)	214 (58.79%)	581 (46.67%)	26 (50%)	321 (52.8%)	369 (28.49%)	183 (16.21%)	0 (0.00%)
Subtotal	972 (100%)	364 (100%)	1245 (100%)	52 (100%)	608 (100%)	1295 (100%)	1129 (100%)	3 (100.00%)
Hexa-nucleotide repeats (HNR)
AAAAAT/ATTTTT	100 (23.04%)	49 (14.2%)	117 (6.53%)	1 (2.17%)	1 (0.38%)	62 (12.97%)	95 (21.94%)	0 (0.00%)
AAAAAG/CTTTTT	50 (11.52%)	4 (1.16%)	32 (1.78%)	1 (2.17%)	5 (1.91%)	52 (10.88%)	82 (18.94%)	0 (0.00%)
AGGGGG/CCCCCT	24 (5.53%)	0 (0%)	42 (2.34%)	0 (0%)	7 (2.67%)	2 (0.42%)	4 (0.92%)	0 (0.00%)
AAAAAC/GTTTTT	18 (4.15%)	5 (1.45%)	25 (1.39%)	3 (6.52%)	2 (0.76%)	42 (8.79%)	13 (3%)	0 (0.00%)
ACCCCC/GGGGGT	18 (4.15%)	2 (0.58%)	27 (1.51%)	0 (0%)	1 (0.38%)	2 (0.42%)	6 (1.39%)	0 (0.00%)
ACCATC/GATGGT	12 (2.76%)	3 (0.87%)	16 (0.89%)	4 (8.7%)	2 (0.76%)	4 (0.84%)	3 (0.69%)	0 (0.00%)
CCCCCG/CGGGGG	10 (2.3%)	0 (0%)	5 (0.28%)	0 (0%)	5 (1.91%)	0 (0%)	0 (0%)	0 (0.00%)
AAGAGG/CCTCTT	9 (2.07%)	2 (0.58%)	14 (0.78%)	1 (2.17%)	3 (1.15%)	2 (0.42%)	3 (0.69%)	0 (0.00%)
Others	193 (44.47%)	280 (81.16%)	1515 (84.5%)	36 (78.26%)	236 (90.08%)	312 (65.27%)	227 (52.42%)	4 (100.00%)
Subtotal	434 (100%)	345 (100%)	1793 (100%)	46 (100%)	262 (100%)	478 (100%)	433 (100%)	4 (100.00%)
